# Supplementary material for: Maturing Mycobacterium smegmatis peptidoglycan requires non-canonical crosslinks to maintain shape
Source: eLife. 2018 Oct 16;7:e37516. doi: 10.7554/eLife.37516 (PMC6231781; doi:10.7554/eLife.37516)
Supplement: Figure 1—figure supplement 2—source data 1. [file elife-37516-fig1-figsupp2-data1.xlsx]

## Sheet: T=0
length um	ALEXA	RADA
0	35.267	230.576
0.07222	42.071	337.652
0.14444	50.07	491.652
0.21667	62.714	622.554
0.28889	78.71	805.033
0.36111	99.499	949.864
0.43333	130.422	1002.18
0.50555	164.152	1066.2
0.57778	194.685	1027.64
0.65	225.003	1032.8
0.72222	253.11	1036.35
0.79444	280.056	982.023
0.86666	313.805	913.349
0.93889	345.749	869.312
1.01111	373.127	802.544
1.08333	397.13	732.407
1.15555	415.765	687.756
1.22777	434.364	625.979
1.3	441.94	592.012
1.37222	445.755	572.225
1.44444	452.04	536.126
1.51666	455.266	526.115
1.58888	452.106	510.205
1.66111	453.073	478.075
1.73333	454.031	459.56
1.80555	454.805	457.334
1.87777	450.875	453.574
1.94999	452.756	445.337
2.02222	457.183	425.134
2.09444	458.862	410.819
2.16666	467.038	421.125
2.23888	475.517	413.124
2.3111	475.035	398.403
2.38333	475.049	388.283
2.45555	481.162	374.537
2.52777	484.171	382.799
2.59999	490.603	365.599
2.67221	494.744	388.197
2.74444	496.959	373.164
2.81666	491.491	370.105
2.88888	486.737	362.43
2.9611	483.719	361.153
3.03332	482.85	351.702
3.10555	479.555	338.441
3.17777	477.91	352.628
3.24999	472.365	343.148
3.32221	463.419	320.415
3.39443	455.851	334.384
3.46666	455.597	316.576
3.53888	445.086	325.186
3.6111	438.154	313.278
3.68332	435.173	331.445
3.75554	435.974	336.138
3.82776	429.162	343.845
3.89999	428.46	369.699
3.97221	430.689	341.017
4.04443	428.719	316.902
4.11665	424.165	309.778
4.18887	419.158	306.968
4.2611	422.423	304.042
4.33332	424.841	296.962
4.40554	424.944	303.488
4.47776	428.663	291.356
4.54998	433.197	280.904
4.62221	431.033	286.075
4.69443	434.209	295.833
4.76665	429.203	297.568
4.83887	421.512	292.581
4.91109	416.619	278.728
4.98332	412.076	269.903
5.05554	406.325	280.855
5.12776	406.977	276.248
5.19998	405.33	263.126
5.2722	406.91	279.394
5.34443	407.647	266.168
5.41665	404.975	293.021
5.48887	398.892	298.01
5.56109	389.175	316.779
5.63331	365.641	329.433
5.70554	318.511	324.812
5.77776	247.574	289.706

## Sheet: T=30
length um	ALEXA	RADA
0	3.653	124.355
0.07222	3.866	173.592
0.14444	3.679	272.95
0.21667	4.758	315.523
0.28889	5.089	339.679
0.36111	5.057	367.319
0.43333	6.483	366.166
0.50555	6.065	368.411
0.57778	7.113	387.701
0.65	8.435	379.95
0.72222	8.858	381.349
0.79444	8.873	367.717
0.86666	9.145	387.203
0.93889	11.269	380.545
1.01111	11.249	378.413
1.08333	11.742	389.165
1.15555	13.276	397.548
1.22777	13.456	375.921
1.3	16.479	373.826
1.37222	17.495	366.463
1.44444	18.388	396.905
1.51666	20.24	382.33
1.58888	21.665	372.585
1.66111	23.137	385.297
1.73333	25.486	395.203
1.80555	26.833	381.913
1.87777	28.713	413.582
1.94999	32.225	412.156
2.02222	35.721	420.63
2.09444	38.109	431.922
2.16666	43.4	447.181
2.23888	48.175	454.739
2.3111	57.446	521.304
2.38333	68.897	623.907
2.45555	87.159	695.595
2.52777	112.227	814.768
2.59999	141.807	856.488
2.67221	176.711	919.454
2.74444	209.477	930.747
2.81666	242.473	895.856
2.88888	272.152	895.169
2.9611	301.068	836.926
3.03332	333.805	801.759
3.10555	367.206	753.062
3.17777	395.808	711.971
3.24999	428.14	632.317
3.32221	445.97	583.509
3.39443	466.526	542.773
3.46666	478.047	517.234
3.53888	484.644	475.723
3.6111	488.01	463.484
3.68332	494.964	465.6
3.75554	499.145	442.038
3.82776	497.303	425.918
3.89999	495.385	413.684
3.97221	497.915	392.425
4.04443	499.116	389.768
4.11665	499.989	387.657
4.18887	502.038	385.73
4.2611	506.779	374.619
4.33332	510.003	369.19
4.40554	512.798	358.05
4.47776	513.626	356.674
4.54998	520.665	335.512
4.62221	525.569	331.339
4.69443	524.006	334.851
4.76665	533.356	337.139
4.83887	533.73	349.987
4.91109	543.838	354.275
4.98332	545.188	378.381
5.05554	537.893	404.773
5.12776	533.834	418.809
5.19998	535.98	412.391
5.2722	529.008	377.288
5.34443	527.698	333.154
5.41665	522.243	305.596
5.48887	517.969	298.328
5.56109	508.918	292.554
5.63331	502.144	287.066
5.70554	492.113	290.795
5.77776	480.411	252.544
5.84998	474.811	277.998
5.9222	469.732	271.205
5.99442	467.11	273.137
6.06665	465.831	283.955
6.13887	464.149	286.804
6.21109	461.904	282.322
6.28331	462.392	268.825
6.35553	462.104	255.014
6.42776	457.578	241.993
6.49998	456.897	257.051
6.5722	459.339	244.709
6.64442	461.315	247.122
6.71664	465.718	249.921
6.78887	470.578	252.341
6.86109	474.163	265.453
6.93331	476.996	254.717
7.00553	475.988	246.41
7.07775	474.715	251.162
7.14998	466.846	251.975
7.2222	456.979	260.668
7.29442	457.732	246.024
7.36664	456.705	243.823
7.43886	451.64	251.887
7.51109	454.378	259.729
7.58331	456.989	258.457
7.65553	453.077	266.381
7.72775	447.52	288.668
7.79997	433.834	304.948
7.8722	416.043	309.678
7.94442	379.865	338.622
8.01664	326.395	393.175
8.08886	261.079	417.988
8.16108	194.924	390.483
8.23331	142.93	371.564
8.30553	108.593	363.719
8.37775	81.939	355.416
8.44997	64.234	342.376
8.52219	53.407	318.003
8.59442	43.066	311.921
8.66664	36.743	294.424
8.73886	31.21	270.142
8.81108	25.902	214.453
8.8833	23.369	143.191
8.95553	22.252	99.984
