# Supplementary material for: Maturing Mycobacterium smegmatis peptidoglycan requires non-canonical crosslinks to maintain shape
Source: eLife. 2018 Oct 16;7:e37516. doi: 10.7554/eLife.37516 (PMC6231781; doi:10.7554/eLife.37516)
Supplement: Figure 1—source data 1. [file elife-37516-fig1-data1.xlsx]

## Sheet: Sheet1
gene	MWU p-value	log10(Pval)	proportion of Low 1 population	proportion of High 1 population	proportion of Low 2 population	proportion of High 2 population	L2/H2	neg log10pval
'MSMEG_0001 '	NaN	#VALUE!	0	0	1.03309e-07	0	#DIV/0!	#VALUE!
'MSMEG_0002 '	0.458562	-0.338602	4.80752e-05	3.40704e-05	2.59306e-05	3.10128e-05	0.836126	0.338602
'MSMEG_0003 '	NaN	#VALUE!	0	0	1.03309e-07	4.80479e-06	0.0215013	#VALUE!
'MSMEG_0004 '	0.00578898	-2.2374	2.50827e-06	2.2932e-06	0	8.95439e-06	0	2.2374
'MSMEG_0005 '	NaN	#VALUE!	6.96743e-07	3.276e-07	2.06618e-07	1.092e-07	1.89211	#VALUE!
'MSMEG_0006 '	NaN	#VALUE!	1.39349e-07	0	1.03309e-07	0	#DIV/0!	#VALUE!
'MSMEG_0007 '	0.474504	-0.32376	0.000164571	8.76875e-05	5.20678e-05	6.28991e-05	0.827798	0.32376
'MSMEG_0008 '	NaN	#VALUE!	0	0	1.03309e-07	0	#DIV/0!	#VALUE!
'MSMEG_0011 '	0.03102	-1.50836	0.000324125	0.000203658	0.000272116	0.000170898	1.59227	1.50836
'MSMEG_0012 '	0.00791318	-2.10165	6.42397e-05	9.90443e-05	7.69653e-05	3.41796e-05	2.25179	2.10165
'MSMEG_0013 '	0.733274	-0.134734	0.000277304	0.000184985	0.000218189	0.000229538	0.950556	0.134734
'MSMEG_0014 '	0.0587304	-1.23114	7.87319e-05	0.000136172	0.000107028	0.000149495	0.715934	1.23114
'MSMEG_0015 '	6.50823e-07	-6.18654	2.89845e-05	4.18235e-05	7.06634e-05	9.17279e-06	7.70359	6.18654
'MSMEG_0016 '	0.000918618	-3.03686	5.43459e-06	1.16844e-05	1.16739e-05	0	#DIV/0!	3.03686
'MSMEG_0017 '	0.20496	-0.688331	0.000168054	0.000171662	0.00011209	8.32103e-05	1.34707	0.688331
'MSMEG_0018 '	0.155826	-0.80736	0.000191883	0.000189134	0.000207445	0.00015692	1.32198	0.80736
'MSMEG_0019 '	0.983007	-0.00744345	0.00278168	0.00252394	0.00277313	0.00265541	1.04433	0.00744345
'MSMEG_0020 '	0.327185	-0.485206	8.37485e-05	0.0001187	0.000122111	0.00010374	1.17709	0.485206
'MSMEG_0021 '	0.00273851	-2.56249	0.000114684	9.47855e-05	0.000125211	6.44279e-05	1.94342	2.56249
'MSMEG_0022 '	0.0524345	-1.28038	0.000286501	0.000280098	0.000405798	0.000273436	1.48407	1.28038
'MSMEG_0023 '	0.34299	-0.464719	5.33705e-05	6.75947e-05	1.84923e-05	1.3104e-05	1.4112	0.464719
'MSMEG_0024 '	0.628946	-0.201387	0.000247344	0.000186623	9.90734e-05	0.000104504	0.948032	0.201387
'MSMEG_0025 '	0.0038199	-2.41795	0.00012611	8.84519e-05	0.000171493	8.60495e-05	1.99296	2.41795
'MSMEG_0027 '	0.244639	-0.611475	0.000244278	0.000390608	0.000387099	0.000312639	1.23817	0.611475
'MSMEG_0030 '	0.00450651	-2.34616	1.28201e-05	3.53808e-05	4.42163e-05	1.71444e-05	2.57905	2.34616
'MSMEG_0031 '	0.0779829	-1.108	5.75509e-05	0.000137155	5.29976e-05	7.66583e-05	0.691348	1.108
'MSMEG_0032 '	0.313622	-0.503593	6.06166e-05	7.90607e-05	3.09927e-05	3.80016e-05	0.815565	0.503593
'MSMEG_0033 '	NaN	#VALUE!	2.09023e-06	9.82799e-07	2.2728e-06	1.092e-06	2.08132	#VALUE!
'MSMEG_0034 '	0.0709748	-1.1489	2.99599e-05	7.46927e-05	1.23971e-05	2.6208e-05	0.473028	1.1489
'MSMEG_0035 '	0.0530763	-1.2751	7.70597e-05	3.06852e-05	3.82244e-05	1.84548e-05	2.07124	1.2751
'MSMEG_0036 '	NaN	#VALUE!	0	0	0	1.092e-07	0	#VALUE!
'MSMEG_0038 '	0.918739	-0.0368076	2.92632e-05	6.47555e-05	6.57046e-05	6.55199e-05	1.00282	0.0368076
'MSMEG_0039 '	0.26342	-0.579351	0.000166382	0.000144253	0.000231826	0.000188697	1.22856	0.579351
'MSMEG_0040 '	0.110423	-0.956939	2.64762e-05	7.04339e-05	6.0849e-05	3.94211e-05	1.54356	0.956939
'MSMEG_0041 '	0.515793	-0.287525	0.000101306	7.36007e-05	6.82873e-05	5.30711e-05	1.28671	0.287525
'MSMEG_0042 '	NaN	#VALUE!	8.36091e-07	0	1.03309e-07	0	#DIV/0!	#VALUE!
'MSMEG_0043 '	0.0855788	-1.06763	0.000206933	0.000209555	0.000252591	0.000183347	1.37767	1.06763
'MSMEG_0044 '	0.0331328	-1.47974	0.000207351	0.000228774	0.000288956	0.000184329	1.5676	1.47974
'MSMEG_0045 '	0.761152	-0.118529	0.000331231	0.00034387	0.000260029	0.00026754	0.971927	0.118529
'MSMEG_0046 '	0.802951	-0.095311	0.00039575	0.000372699	0.000517269	0.000458093	1.12918	0.095311
'MSMEG_0047 '	0.596919	-0.224085	0.000111339	0.000104613	0.00010114	9.17279e-05	1.1026	0.224085
'MSMEG_0048 '	0.0287884	-1.54078	0.000308936	0.000239694	0.000159199	0.000234343	0.679343	1.54078
'MSMEG_0049 '	0.616592	-0.210002	8.31911e-05	0.000125252	0.000106202	0.000108326	0.980388	0.210002
'MSMEG_0050 '	0.000570689	-3.2436	0.000105347	4.12775e-05	1.23971e-05	4.56455e-05	0.271595	3.2436
'MSMEG_0053 '	0.0199104	-1.70092	0.000450653	0.000339939	0.000449085	0.000302374	1.48519	1.70092
'MSMEG_0054 '	0.716756	-0.144629	0.000267689	0.000229757	0.00025507	0.000232268	1.09817	0.144629
'MSMEG_0055 '	0.0381861	-1.41809	0.000525205	0.000469996	0.000613243	0.000418126	1.46664	1.41809
'MSMEG_0056 '	0.17492	-0.75716	0.00011343	6.83591e-05	6.3845e-05	8.48483e-05	0.752461	0.75716
'MSMEG_0057 '	0.000731768	-3.13563	0.000107298	0.000110947	0.000139571	6.42095e-05	2.17367	3.13563
'MSMEG_0058 '	6.6391e-06	-5.17789	3.98537e-05	6.77039e-06	2.43809e-05	8.68139e-05	0.280842	5.17789
'MSMEG_0059 '	0.304356	-0.516618	0.000332486	0.000277149	0.000353214	0.000401855	0.878957	0.516618
'MSMEG_0060 '	0.0769753	-1.11365	0.000309075	0.000344307	0.000198457	0.000282937	0.701417	1.11365
'MSMEG_0061 '	0.820075	-0.0861464	0.000415677	0.00042992	0.000536071	0.0004831	1.10965	0.0861464
'MSMEG_0062 '	0.527262	-0.277974	0.000596412	0.000410264	0.000538447	0.000492382	1.09355	0.277974
'MSMEG_0063 '	0.115933	-0.935793	0.000200523	0.000189134	0.000245772	0.000183019	1.34288	0.935793
'MSMEG_0064 '	0.0214442	-1.66869	0.000101306	0.000120993	0.000122938	0.00018018	0.682306	1.66869
'MSMEG_0065 '	0.0211792	-1.67409	3.05173e-05	4.28063e-05	0.000105685	6.11519e-05	1.72824	1.67409
'MSMEG_0066 '	0.853094	-0.0690032	7.23219e-05	7.80779e-05	7.62421e-05	7.64399e-05	0.997412	0.0690032
'MSMEG_0067 '	0.00254082	-2.59503	0.000161505	0.000145127	0.000307551	0.000171225	1.79618	2.59503
'MSMEG_0068 '	5.83788e-06	-5.23374	0.000116774	0.000138793	0.000163228	5.85311e-05	2.78874	5.23374
'MSMEG_0069 '	0.155107	-0.809368	0.00013698	0.000155719	0.000229449	0.000175047	1.31079	0.809368
'MSMEG_0071 '	0.0495218	-1.3052	0.000461244	0.000445645	0.000551774	0.000731311	0.754499	1.3052
'MSMEG_0072 '	0.427919	-0.368639	0.000368159	0.00039443	0.00038462	0.000428937	0.896681	0.368639
'MSMEG_0073 '	0.858519	-0.06625	0.000378889	0.0003549	0.000365094	0.000339939	1.074	0.06625
'MSMEG_0074 '	0.292322	-0.534139	0.000541648	0.00059372	0.000653843	0.000542832	1.2045	0.534139
'MSMEG_0075 '	0.00319167	-2.49598	4.96081e-05	3.12312e-05	2.87199e-05	6.65027e-05	0.431861	2.49598
'MSMEG_0076 '	0.0144445	-1.8403	0.000260582	0.000232923	0.000280174	0.000179852	1.5578	1.8403
'MSMEG_0077 '	0.143121	-0.844296	0.00015189	5.54735e-05	0.000115293	7.58939e-05	1.51913	0.844296
'MSMEG_0078 '	0.531759	-0.274285	0.000248319	0.000231067	0.000213127	0.000183783	1.15966	0.274285
'MSMEG_0079 '	0.83306	-0.0793239	0.00020972	0.000250504	0.000244429	0.000225607	1.08343	0.0793239
'MSMEG_0080 '	0.0280977	-1.55133	0.000160251	0.000110729	0.000146802	8.82335e-05	1.66379	1.55133
'MSMEG_0081 '	0.00355672	-2.44895	3.83208e-05	1.27764e-05	8.30605e-05	3.87659e-05	2.14261	2.44895
'MSMEG_0082 '	4.1219e-07	-6.3849	0.000186866	0.000162053	0.000379454	0.000144581	2.62452	6.3849
'MSMEG_0083 '	0.0681264	-1.16668	0.000349486	0.000327818	0.000521608	0.000370406	1.40821	1.16668
'MSMEG_0084 '	6.51116e-05	-4.18634	2.4804e-05	1.84548e-05	5.84729e-05	1.60524e-05	3.64263	4.18634
'MSMEG_0085 '	0.401426	-0.396395	0.000405365	0.000350204	0.000394434	0.000327927	1.20281	0.396395
'MSMEG_0086 '	0.240851	-0.618251	4.51489e-05	2.32596e-05	3.28523e-05	2.08572e-05	1.57511	0.618251
'MSMEG_0087 '	0.249987	-0.602083	4.16652e-05	4.13867e-05	7.7895e-05	5.29619e-05	1.47077	0.602083
'MSMEG_0088 '	0.228953	-0.640254	0.000344609	0.000366366	0.000349495	0.000416161	0.839807	0.640254
'MSMEG_0089 '	2.88847e-05	-4.53933	0.000384602	0.000347692	0.000411687	0.000193065	2.13237	4.53933
'MSMEG_0090 '	0.057147	-1.24301	0.000330813	0.000292	0.000391748	0.000258476	1.51561	1.24301
'MSMEG_0091 '	0.00132782	-2.87686	0.000939488	0.000974063	0.000849924	0.00137406	0.618548	2.87686
'MSMEG_0092 '	3.38861e-10	-9.46998	0.000157603	0.000203876	7.92381e-05	0.000307288	0.257862	9.46998
'MSMEG_0093 '	0.0027618	-2.55881	0.000397701	0.000441932	0.000472123	0.000744525	0.634126	2.55881
'MSMEG_0094 '	1.85455e-06	-5.73176	6.49364e-05	5.18699e-05	4.4113e-05	0.000142069	0.310504	5.73176
'MSMEG_0095 '	0.414213	-0.382777	0.000496638	0.00058007	0.000567993	0.000482445	1.17732	0.382777
'MSMEG_0096 '	0.000914714	-3.03871	0.000439784	0.0002552	0.000457866	0.000245809	1.86269	3.03871
'MSMEG_0097 '	0.892699	-0.0492947	3.55339e-05	8.82335e-05	6.26053e-05	6.08243e-05	1.02928	0.0492947
'MSMEG_0098 '	0.651153	-0.186317	5.12803e-05	4.02947e-05	6.27086e-05	7.49111e-05	0.837107	0.186317
'MSMEG_0099 '	1.31069e-05	-4.8825	5.4764e-05	7.74227e-05	1.71493e-05	6.87959e-05	0.249278	4.8825
'MSMEG_0100 '	0.00616055	-2.21038	0.000166382	0.000109746	0.00011364	5.77667e-05	1.96722	2.21038
'MSMEG_0101 '	0.678493	-0.168454	2.95419e-05	6.85775e-05	5.28943e-05	4.80479e-05	1.10086	0.168454
'MSMEG_0102 '	0.0352093	-1.45334	0.000127643	9.52223e-05	9.73172e-05	5.85311e-05	1.66266	1.45334
'MSMEG_0103 '	0.127981	-0.892854	0.000540672	0.000578104	0.000459415	0.000561178	0.818663	0.892854
'MSMEG_0104 '	0.340036	-0.468475	0.000131824	0.000101556	0.000163538	0.000129402	1.2638	0.468475
'MSMEG_0105 '	0.00508819	-2.29344	0.000113708	0.00012962	7.7895e-05	0.000137592	0.566131	2.29344
'MSMEG_0106 '	0.517792	-0.285845	0.00012611	0.000176685	0.000175625	0.000150805	1.16459	0.285845
'MSMEG_0107 '	0.5869	-0.231436	0.000380282	0.000345727	0.000294328	0.000302484	0.973036	0.231436
'MSMEG_0108 '	0.311986	-0.505865	0.000550566	0.000427081	0.000403525	0.000461806	0.873798	0.505865
'MSMEG_0109 '	0.0174023	-1.75939	0.000539697	0.000595139	0.000489995	0.000657383	0.745372	1.75939
'MSMEG_0110 '	0.638797	-0.194637	0.000599477	0.000641549	0.000612416	0.000620474	0.987014	0.194637
'MSMEG_0111 '	0.534142	-0.272343	0.00064379	0.00069058	0.000637624	0.000699207	0.911924	0.272343
'MSMEG_0112 '	0.629076	-0.201297	5.43459e-06	9.93719e-06	2.48975e-05	1.84548e-05	1.34911	0.201297
'MSMEG_0113 '	0.0130378	-1.8848	0.000177809	0.000265574	0.00025538	0.000155064	1.64694	1.8848
'MSMEG_0114 '	0.652228	-0.1856	0.000134471	0.00012962	0.000122525	0.000107016	1.14492	0.1856
'MSMEG_0115 '	0.898996	-0.0462422	1.47709e-05	3.4944e-05	5.15512e-05	4.37891e-05	1.17726	0.0462422
'MSMEG_0116 '	0.893575	-0.0488692	3.06567e-05	1.95468e-05	2.56207e-05	2.47884e-05	1.03358	0.0488692
'MSMEG_0117 '	0.14654	-0.834045	0.000367601	0.000429592	0.00035311	0.000464645	0.759957	0.834045
'MSMEG_0118 '	0.512708	-0.29013	0.000125832	9.21647e-05	6.21921e-05	5.49275e-05	1.13226	0.29013
'MSMEG_0119 '	0.000378357	-3.4221	0.000165546	0.000113349	0.000163538	7.16351e-05	2.28293	3.4221
'MSMEG_0120 '	0.0001979	-3.70355	0.000322731	0.00028392	5.57869e-05	0.000127873	0.436268	3.70355
'MSMEG_0121 '	0.717795	-0.144	0.000306288	0.00034256	0.000302902	0.000282828	1.07098	0.144
'MSMEG_0122 '	0.982982	-0.00745435	0.000163735	0.000219929	0.000287716	0.000273	1.05391	0.00745435
'MSMEG_0123 '	0.705808	-0.151313	4.54276e-05	2.3478e-05	2.55173e-05	2.31504e-05	1.10224	0.151313
'MSMEG_0124 '	0.000374623	-3.42641	3.26076e-05	3.73464e-05	1.03309e-07	1.67076e-05	0.00618337	3.42641
'MSMEG_0125 '	0.0720398	-1.14243	0.000189375	0.000141305	0.000133682	8.80151e-05	1.51885	1.14243
'MSMEG_0126 '	0.771787	-0.112503	7.98467e-05	0.000109091	8.10976e-05	6.91235e-05	1.17323	0.112503
'MSMEG_0127 '	0.302569	-0.519176	6.1592e-05	7.21811e-05	2.50008e-05	1.638e-05	1.5263	0.519176
'MSMEG_0128 '	0.635184	-0.1971	0.000245811	0.000241441	0.000172939	0.000184875	0.935438	0.1971
'MSMEG_0130 '	0.853162	-0.0689686	8.17976e-05	0.000106251	9.74205e-05	8.81243e-05	1.10549	0.0689686
'MSMEG_0131 '	0.93577	-0.0288308	0.000470719	0.000350968	0.000464581	0.000448811	1.03514	0.0288308
'MSMEG_0132 '	0.0028673	-2.54253	0.000233269	0.000243297	0.000301766	0.000170133	1.7737	2.54253
'MSMEG_0133 '	0.0108974	-1.96268	0.000286779	0.000193611	0.000205585	0.000118919	1.72879	1.96268
'MSMEG_0134 '	0.0981108	-1.00828	0.00023522	0.000255309	0.000191535	0.000133988	1.42949	1.00828
'MSMEG_0135 '	0.00415452	-2.38148	5.10016e-05	0.000103194	8.02712e-05	3.57084e-05	2.24797	2.38148
'MSMEG_0136 '	0.0449037	-1.34772	5.40672e-05	4.37891e-05	4.35964e-05	2.2932e-05	1.90112	1.34772
'MSMEG_0137 '	0.0148901	-1.8271	0.000116913	4.95767e-05	0.000139364	7.56755e-05	1.8416	1.8271
'MSMEG_0138 '	0.110423	-0.956939	5.25344e-05	9.72971e-05	3.89475e-05	5.62379e-05	0.692549	0.956939
'MSMEG_0139 '	0.670807	-0.173402	0.000658004	0.000689706	0.000529356	0.00047087	1.12421	0.173402
'MSMEG_0140 '	0.163325	-0.786948	0.000208047	0.000113349	8.88458e-05	0.000116407	0.763234	0.786948
'MSMEG_0141 '	0.853247	-0.0689253	0.000241352	0.00023882	0.000152381	0.00015146	1.00608	0.0689253
'MSMEG_0142 '	0.636216	-0.196396	1.10085e-05	4.64099e-05	6.22954e-05	5.33987e-05	1.16661	0.196396
'MSMEG_0143 '	0.0995872	-1.0018	6.52151e-05	6.89051e-05	3.50218e-05	5.19791e-05	0.673766	1.0018
'MSMEG_0144 '	0.670482	-0.173613	0.000170423	0.000182801	0.000247838	0.000220802	1.12245	0.173613
'MSMEG_0145 '	0.90999	-0.0409633	1.89514e-05	1.61616e-05	5.16545e-05	5.11055e-05	1.01074	0.0409633
'MSMEG_0146 '	0.0357197	-1.44709	0.000101864	6.32267e-05	4.31832e-05	7.34915e-05	0.587594	1.44709
'MSMEG_0147 '	0.0135421	-1.86831	0.000251245	0.000262516	0.000177278	0.00025935	0.68355	1.86831
'MSMEG_0149 '	0.209144	-0.679554	4.83539e-05	0.000114332	7.55189e-05	5.38355e-05	1.40277	0.679554
'MSMEG_0150 '	0.000307276	-3.51247	3.92963e-05	4.89215e-05	5.86796e-05	2.00928e-05	2.92043	3.51247
'MSMEG_0151 '	0.382425	-0.417454	7.14858e-05	6.99971e-05	7.83083e-05	8.56127e-05	0.914681	0.417454
'MSMEG_0152 '	0.928389	-0.0322699	5.26737e-05	4.81571e-05	4.95884e-05	4.69559e-05	1.05606	0.0322699
'MSMEG_0153 '	0.00230126	-2.63804	5.93625e-05	5.83127e-05	5.78531e-05	0.000111821	0.517374	2.63804
'MSMEG_0154 '	NaN	#VALUE!	2.94025e-05	9.50039e-06	0	4.58639e-06	0	#VALUE!
'MSMEG_0155 '	0.360345	-0.443281	3.27469e-05	3.07944e-05	1.98353e-05	1.24488e-05	1.59336	0.443281
'MSMEG_0156 '	0.000741651	-3.1298	0.000117192	0.000105269	8.41969e-05	0.000170024	0.495205	3.1298
'MSMEG_0157 '	0.00173028	-2.76188	9.96342e-05	0.000146219	8.90524e-05	3.75648e-05	2.37064	2.76188
'MSMEG_0158 '	0.149518	-0.825306	0.000185891	0.000213595	0.000252694	0.000192192	1.3148	0.825306
'MSMEG_0159 '	0.507385	-0.294662	2.85664e-05	2.50068e-05	4.08071e-05	4.36799e-05	0.934229	0.294662
'MSMEG_0160 '	0.056178	-1.25043	9.99129e-05	0.000108872	6.93204e-05	0.000104613	0.662634	1.25043
'MSMEG_0161 '	0.00485316	-2.31398	0.000233827	0.000269396	0.000135748	0.000204422	0.664058	2.31398
'MSMEG_0162 '	0.00428576	-2.36797	1.39349e-07	0	8.98789e-06	0	#DIV/0!	2.36797
'MSMEG_0163 '	0.000151577	-3.81937	2.92632e-05	3.46164e-05	3.98773e-05	9.88259e-05	0.403511	3.81937
'MSMEG_0164 '	0.254271	-0.594703	0.000231319	0.000190117	0.000179861	0.000222113	0.809775	0.594703
'MSMEG_0165 '	0.824959	-0.0835677	0.000263647	0.000361561	0.000279244	0.000252252	1.10701	0.0835677
'MSMEG_0166 '	0.0523263	-1.28128	3.05173e-05	4.80479e-05	1.64261e-05	3.06852e-05	0.535312	1.28128
'MSMEG_0167 '	0.928874	-0.0320432	0.000597526	0.000581598	0.000562828	0.000560086	1.0049	0.0320432
'MSMEG_0168 '	0.570235	-0.243946	0.000255147	0.000375538	0.000294224	0.000330548	0.890111	0.243946
'MSMEG_0170 '	0.367401	-0.43486	0.000293468	0.000473709	0.000409104	0.000468358	0.873485	0.43486
'MSMEG_0171 '	0.774809	-0.110805	0.000188399	0.000180398	0.000205275	0.00021021	0.976525	0.110805
'MSMEG_0172 '	1.04199e-07	-6.98214	8.68141e-05	8.52851e-05	0.000175625	5.24159e-05	3.35061	6.98214
'MSMEG_0173 '	0.00141455	-2.84938	4.96081e-05	2.99208e-05	8.88458e-06	4.31339e-05	0.205977	2.84938
'MSMEG_0174 '	0.454255	-0.3427	4.89113e-05	4.82663e-05	7.09733e-05	5.90771e-05	1.20137	0.3427
'MSMEG_0175 '	0.250406	-0.601356	9.90768e-05	4.59731e-05	5.71299e-05	6.97787e-05	0.81873	0.601356
'MSMEG_0176 '	0.0022811	-2.64186	0.000118446	0.000134425	0.000127587	6.24623e-05	2.04262	2.64186
'MSMEG_0177 '	0.00660035	-2.18043	0.000116913	0.000108108	4.98983e-05	9.67511e-05	0.515739	2.18043
'MSMEG_0178 '	0.0114836	-1.93992	3.76241e-05	2.184e-05	3.00629e-05	5.87495e-05	0.511714	1.93992
'MSMEG_0180 '	0.0234147	-1.63051	4.61244e-05	1.9656e-05	4.17369e-05	7.52387e-05	0.554726	1.63051
'MSMEG_0181 '	0.590626	-0.228687	0.000298206	0.000259022	0.000193188	0.000201146	0.960436	0.228687
'MSMEG_0182 '	0.322121	-0.491981	0.000167636	0.00018695	0.000177072	0.000206715	0.856597	0.491981
'MSMEG_0183 '	0.255515	-0.592583	6.21494e-05	2.46792e-05	6.49814e-05	4.89215e-05	1.32828	0.592583
'MSMEG_0184 '	0.222277	-0.653105	7.74778e-05	8.73599e-05	8.02712e-05	5.90771e-05	1.35875	0.653105
'MSMEG_0185 '	0.128964	-0.889531	0.000703849	0.00080251	0.000835667	0.000617853	1.35253	0.889531
'MSMEG_0186 '	0.00164674	-2.78338	9.35029e-05	0.000102975	0.000120355	5.20883e-05	2.3106	2.78338
'MSMEG_0187 '	0.658413	-0.181502	0.000240376	0.000152225	0.000190399	0.000152006	1.25257	0.181502
'MSMEG_0189 '	0.00391524	-2.40724	0.000258073	0.000195031	0.000337511	0.000184548	1.82885	2.40724
'MSMEG_0190 '	0.305673	-0.514743	0.000491064	0.000612065	0.000397947	0.000439093	0.906293	0.514743
'MSMEG_0191 '	0.0920351	-1.03605	0	0	1.39467e-05	2.41332e-05	0.577907	1.03605
'MSMEG_0192 '	0.362157	-0.441103	6.21494e-05	0.000113786	7.86182e-05	6.34451e-05	1.23915	0.441103
'MSMEG_0193 '	0.000462986	-3.33443	0.00016903	0.000197324	0.000158786	6.71579e-05	2.36437	3.33443
'MSMEG_0194 '	0.246823	-0.607614	0.000192719	0.000273436	0.000228106	0.000187387	1.2173	0.607614
'MSMEG_0195 '	0.210343	-0.677072	0.000426267	0.000525361	0.000500946	0.000570242	0.87848	0.677072
'MSMEG_0196 '	0.376734	-0.423966	0.000144783	0.000228119	0.000167671	0.00013508	1.24127	0.423966
'MSMEG_0197 '	0.0811128	-1.09091	6.18707e-05	5.08871e-05	3.21291e-05	5.02319e-05	0.639616	1.09091
'MSMEG_0198 '	0.000866122	-3.06242	0.000189514	0.000159104	0.000174386	8.49575e-05	2.05262	3.06242
'MSMEG_0199 '	0.000757328	-3.12072	0.000133357	0.000108326	9.00855e-05	0.000175047	0.514635	3.12072
'MSMEG_0200 '	0.052742	-1.27784	0.00029737	0.000251706	0.000243086	0.000347911	0.698703	1.27784
'MSMEG_0201 '	0.652499	-0.18542	4.86326e-05	6.67211e-05	5.70266e-05	6.08243e-05	0.937563	0.18542
'MSMEG_0202 '	0.845443	-0.0729158	0.000366208	0.000385694	0.00036809	0.000346491	1.06234	0.0729158
'MSMEG_0203 '	0.801659	-0.0960105	0.000313395	0.000304995	0.000316332	0.00031941	0.990366	0.0960105
'MSMEG_0204 '	0.145004	-0.83862	0.000213482	0.000200163	0.000246289	0.000304558	0.808675	0.83862
'MSMEG_0205 '	0.161473	-0.7919	0.000194949	0.000187715	0.000166534	0.000122522	1.35922	0.7919
'MSMEG_0206 '	0.375108	-0.425844	0.000358544	0.000605295	0.000498466	0.00054458	0.915323	0.425844
'MSMEG_0207 '	NaN	#VALUE!	1.11479e-05	0	4.13236e-06	1.4196e-06	2.91094	#VALUE!
'MSMEG_0208 '	0.719156	-0.143177	7.58056e-05	0.000110619	8.87425e-05	8.41931e-05	1.05404	0.143177
'MSMEG_0209 '	0.00258968	-2.58675	1.67218e-05	1.5288e-05	2.67571e-05	5.89679e-06	4.53756	2.58675
'MSMEG_0210 '	0.442713	-0.353878	0.000306845	0.000314714	0.000319742	0.000268632	1.19026	0.353878
'MSMEG_0211 '	0.958951	-0.0182038	0.000352134	0.0003003	0.000367987	0.000350422	1.05012	0.0182038
'MSMEG_0212 '	0.33546	-0.474359	5.86657e-05	6.97787e-05	7.02502e-05	5.92955e-05	1.18475	0.474359
'MSMEG_0213 '	0.657413	-0.182162	0.000241352	0.000184439	0.000149592	0.000133115	1.12378	0.182162
'MSMEG_0214 '	0.017425	-1.75883	0.000284828	0.000312312	0.000213746	0.000315478	0.677531	1.75883
'MSMEG_0215 '	0.983415	-0.00726325	0.000123184	6.69395e-05	0.000123351	0.000110073	1.12062	0.00726325
'MSMEG_0216 '	0.730551	-0.13635	0.00030378	0.000214578	0.000305485	0.00026481	1.1536	0.13635
'MSMEG_0217 '	0.394864	-0.403552	0.000238983	0.000328036	0.000179964	0.000203876	0.882715	0.403552
'MSMEG_0218 '	0.163039	-0.787708	0.000176694	0.000191427	0.000136885	0.000169478	0.807682	0.787708
'MSMEG_0219 '	0.332135	-0.478686	0.000502073	0.00061556	0.000505595	0.000526671	0.959982	0.478686
'MSMEG_0220 '	0.210706	-0.676323	0.000161784	9.21647e-05	7.32461e-05	8.98715e-05	0.81501	0.676323
'MSMEG_0221 '	3.31862e-06	-5.47904	5.2395e-05	1.911e-05	3.9774e-05	3.6036e-06	11.0373	5.47904
'MSMEG_0222 '	3.17476e-09	-8.49829	0.00017112	0.000135408	5.50637e-05	0.000215015	0.256093	8.49829
'MSMEG_0223 '	0.0046916	-2.32868	0.000103397	6.65027e-05	0.000145046	7.28363e-05	1.9914	2.32868
'MSMEG_0224 '	0.123962	-0.906712	4.52883e-05	7.20719e-05	5.15512e-05	3.28692e-05	1.56838	0.906712
'MSMEG_0225 '	0.250067	-0.601944	0.000924717	0.00106099	0.000848994	0.00094851	0.895082	0.601944
'MSMEG_0226 '	0.741387	-0.129955	0.000127086	0.000149276	0.000151864	0.000135408	1.12153	0.129955
'MSMEG_0227 '	0.00171413	-2.76596	4.76572e-05	3.04668e-05	3.23357e-05	7.77503e-05	0.415892	2.76596
'MSMEG_0228 '	0.24733	-0.606723	0.000451489	0.000483319	0.000454353	0.000517389	0.878166	0.606723
'MSMEG_0229 '	0.0342756	-1.46501	0.000305452	0.000320283	0.000246909	0.00032891	0.750688	1.46501
'MSMEG_0230 '	0.0223617	-1.6505	0.00013043	0.000124051	0.000153414	8.88887e-05	1.72591	1.6505
'MSMEG_0231 '	0.0147756	-1.83045	6.84201e-05	7.22903e-05	3.96707e-05	1.45236e-05	2.73147	1.83045
'MSMEG_0232 '	0.616993	-0.209719	0.000276189	0.000262516	0.000318502	0.000332732	0.957233	0.209719
'MSMEG_0233 '	2.0689e-31	-30.6843	0.00160697	0.000255637	0.00187537	4.58639e-05	40.8899	30.6843
'MSMEG_0234 '	0.406047	-0.391423	0.000506671	0.000594484	0.000529459	0.000545562	0.970483	0.391423
'MSMEG_0235 '	0.0201211	-1.69635	2.06236e-05	5.54735e-05	6.87005e-05	3.68004e-05	1.86684	1.69635
'MSMEG_0236 '	0.00755154	-2.12196	6.9953e-05	6.34451e-05	3.64681e-05	7.34915e-05	0.496222	2.12196
'MSMEG_0237 '	0.00948148	-2.02312	0.000186727	0.000170898	0.000147319	0.00025935	0.568031	2.02312
'MSMEG_0238 '	0.325989	-0.486798	0.00025877	0.000235435	0.000207341	0.0002374	0.873382	0.486798
'MSMEG_0239 '	0.206535	-0.685006	0.000398955	0.000332623	0.000388959	0.000303466	1.28172	0.685006
'MSMEG_0240 '	0.0283722	-1.54711	8.98798e-05	3.13404e-05	3.17159e-05	1.68168e-05	1.88597	1.54711
'MSMEG_0241 '	1.86552e-10	-9.7292	0.000101864	1.77996e-05	6.48781e-05	1.092e-07	594.123	9.7292
'MSMEG_0242 '	0.00107897	-2.96699	5.21163e-05	4.00763e-05	6.01259e-05	0.000124706	0.48214	2.96699
'MSMEG_0243 '	6.51401e-09	-8.18615	7.90106e-05	0.00010232	9.40113e-06	7.67675e-05	0.122462	8.18615
'MSMEG_0244 '	0.000807876	-3.09266	5.62968e-05	0.000214687	9.24616e-05	0.000182364	0.507018	3.09266
'MSMEG_0245 '	0.657959	-0.181801	3.94356e-05	8.80151e-05	0.000111264	9.54407e-05	1.16579	0.181801
'MSMEG_0247 '	0.0436477	-1.36004	6.95349e-05	0.00016653	0.000109611	0.000158231	0.692729	1.36004
'MSMEG_0248 '	0.963126	-0.0163168	0.000219335	0.000255091	0.000220462	0.000212612	1.03692	0.0163168
'MSMEG_0249 '	0.00129288	-2.88844	6.9953e-05	9.55499e-05	4.58692e-05	1.70352e-05	2.69262	2.88844
'MSMEG_0251 '	2.46253e-06	-5.60862	5.71329e-05	5.41631e-05	1.63228e-05	7.05431e-05	0.231388	5.60862
'MSMEG_0252 '	0.000167099	-3.77703	8.34698e-05	5.70023e-05	7.79984e-05	2.53344e-05	3.07876	3.77703
'MSMEG_0253 '	0.136816	-0.863864	3.70667e-05	1.62708e-05	2.0042e-05	1.0374e-05	1.93194	0.863864
'MSMEG_0254 '	0.928302	-0.0323108	0.00019035	0.000258258	0.000211474	0.000210428	1.00497	0.0323108
'MSMEG_0255 '	0.680985	-0.166862	0.000682947	0.000836034	0.000995176	0.0010232	0.972609	0.166862
'MSMEG_0256 '	0.939519	-0.0270945	0.000357011	0.000294403	0.000358276	0.000350641	1.02177	0.0270945
'MSMEG_0257 '	0.00423111	-2.37355	0.000394217	0.000408626	0.000366954	0.000562052	0.652883	2.37355
'MSMEG_0258 '	0.0334396	-1.47574	7.80352e-06	1.44144e-05	1.42567e-05	2.95932e-05	0.481755	1.47574
'MSMEG_0259 '	0.00375196	-2.42574	6.96743e-05	6.48647e-05	8.72962e-05	3.89843e-05	2.23926	2.42574
'MSMEG_0260 '	0.0159467	-1.79733	0.000214179	0.000183893	0.000133062	0.000209118	0.636302	1.79733
'MSMEG_0261 '	0.497156	-0.303507	4.51489e-05	4.05131e-05	5.96093e-05	7.05431e-05	0.845006	0.303507
'MSMEG_0262 '	0.292507	-0.533864	4.919e-05	8.80151e-05	3.8431e-05	5.26343e-05	0.73015	0.533864
'MSMEG_0263 '	0.0366764	-1.43561	5.67149e-05	4.35707e-05	3.73979e-05	6.42095e-05	0.582435	1.43561
'MSMEG_0264 '	8.46439e-05	-4.0724	4.89113e-05	4.08407e-05	8.0891e-05	2.48976e-05	3.24895	4.0724
'MSMEG_0265 '	7.09759e-05	-4.14889	4.62637e-05	3.21048e-05	4.60759e-05	9.82799e-06	4.68823	4.14889
'MSMEG_0266 '	0.0723725	-1.14043	4.12472e-05	9.20555e-05	0.000114776	7.29455e-05	1.57345	1.14043
'MSMEG_0267 '	0.91253	-0.0397529	4.48702e-05	9.10727e-05	8.02712e-05	7.25087e-05	1.10706	0.0397529
'MSMEG_0268 '	0.00896575	-2.04741	8.93224e-05	6.92327e-05	0.000111987	6.32267e-05	1.7712	2.04741
'MSMEG_0269 '	0.000109921	-3.95892	9.90768e-05	0.000148621	0.000110747	0.000236527	0.468223	3.95892
'MSMEG_0270 '	0.195516	-0.708818	8.79289e-05	6.71579e-05	4.52494e-05	6.25715e-05	0.723163	0.708818
'MSMEG_0271 '	0.0196903	-1.70575	2.87058e-05	5.82035e-05	6.82873e-05	3.47256e-05	1.96649	1.70575
'MSMEG_0272 '	0.966816	-0.0146564	0	0	7.23164e-06	5.45999e-06	1.32448	0.0146564
'MSMEG_0275 '	0.163183	-0.787324	1.07298e-05	5.03411e-05	3.90508e-05	2.57712e-05	1.51529	0.787324
'MSMEG_0276 '	0.858957	-0.0660285	9.39209e-05	0.000172208	0.000145253	0.000141414	1.02715	0.0660285
'MSMEG_0277 '	0.623878	-0.2049	0.000135447	4.36799e-05	7.61388e-05	8.45207e-05	0.90083	0.2049
'MSMEG_0278 '	0.00289102	-2.53895	0	1.51788e-05	2.52074e-05	6.44279e-06	3.9125	2.53895
'MSMEG_0279 '	0.179162	-0.746754	0.000231876	0.000234561	0.000195048	0.000238274	0.818585	0.746754
'MSMEG_0280 '	0.691564	-0.160167	0.000141996	0.000148075	0.00014081	0.000150914	0.933049	0.160167
'MSMEG_0281 '	0.00676126	-2.16997	0.000243442	0.000229866	0.000362718	0.000205842	1.76212	2.16997
'MSMEG_0282 '	0.00771053	-2.11292	0.000196342	0.000153426	0.00015796	8.50667e-05	1.85689	2.11292
'MSMEG_0283 '	5.14456e-06	-5.28865	1.78366e-05	1.13568e-05	2.73769e-05	0	#DIV/0!	5.28865
'MSMEG_0284 '	0.00189992	-2.72127	3.38617e-05	1.67076e-05	3.82244e-06	1.83456e-05	0.208357	2.72127
'MSMEG_0285 '	0.222752	-0.652179	3.77635e-05	3.29784e-05	3.06828e-05	4.31339e-05	0.711338	0.652179
'MSMEG_0286 '	0.00309351	-2.50955	1.30988e-05	3.39612e-05	5.02082e-05	1.8018e-05	2.78656	2.50955
'MSMEG_0287 '	0.114533	-0.94107	3.34436e-06	1.95468e-05	3.55383e-05	1.84548e-05	1.9257	0.94107
'MSMEG_0288 '	0.00161692	-2.79131	0.000126807	6.66119e-05	0.000156823	7.85147e-05	1.99737	2.79131
'MSMEG_0289 '	0.373582	-0.427614	0.000127504	0.0001365	0.000154344	0.000177231	0.87086	0.427614
'MSMEG_0290 '	0.834691	-0.0784741	0.000123881	9.32567e-05	0.000144426	0.000131913	1.09486	0.0784741
'MSMEG_0291 '	0.0128588	-1.8908	3.74848e-05	3.36336e-05	5.31009e-05	2.09664e-05	2.53267	1.8908
'MSMEG_0292 '	0.0197694	-1.70401	1.07298e-05	1.34316e-05	6.19854e-06	0	#DIV/0!	1.70401
'MSMEG_0293 '	4.16875e-05	-4.37999	0.000202055	0.000148621	0.000144943	0.000304777	0.47557	4.37999
'MSMEG_0294 '	0.00386961	-2.41233	0	1.50696e-05	1.03309e-07	8.51759e-06	0.0121289	2.41233
'MSMEG_0295 '	0.00169826	-2.77	3.44191e-05	3.40704e-05	6.8184e-06	3.03576e-05	0.224603	2.77
'MSMEG_0296 '	0.000232836	-3.63295	7.38547e-06	1.6926e-05	1.74592e-05	1.092e-07	159.883	3.63295
'MSMEG_0297 '	0.000282108	-3.54959	3.23289e-05	7.42559e-06	1.7046e-05	1.092e-07	156.099	3.54959
'MSMEG_0298 '	0.000859098	-3.06596	1.08692e-05	2.9484e-06	3.76045e-05	1.04832e-05	3.58713	3.06596
'MSMEG_0299 '	0.149148	-0.826382	0.000128479	0.000117499	0.000134818	9.17279e-05	1.46976	0.826382
'MSMEG_0300 '	0.0655681	-1.18331	9.32242e-05	7.25087e-05	0.000126864	0.000173519	0.731124	1.18331
'MSMEG_0301 '	7.08221e-07	-6.14983	4.20833e-05	3.276e-05	2.75835e-05	0.000100901	0.273373	6.14983
'MSMEG_0302 '	0.168006	-0.774675	9.39209e-05	2.9484e-05	4.71089e-05	2.87196e-05	1.64031	0.774675
'MSMEG_0303 '	0.3089	-0.510182	4.79359e-05	3.36336e-05	3.69847e-05	4.55363e-05	0.812201	0.510182
'MSMEG_0304 '	0.0471886	-1.32616	0.000279812	0.000213923	0.000117462	0.000182364	0.644111	1.32616
'MSMEG_0305 '	0.105818	-0.975441	7.62236e-05	5.42723e-05	6.70476e-05	9.23831e-05	0.725756	0.975441
'MSMEG_0306 '	0.834819	-0.0784079	4.93294e-05	7.49111e-05	5.9816e-05	5.05595e-05	1.18308	0.0784079
'MSMEG_0307 '	0.685795	-0.163806	9.96342e-05	6.27899e-05	6.90105e-05	6.07151e-05	1.13663	0.163806
'MSMEG_0308 '	0.265693	-0.57562	0.000146316	0.000204204	0.000256413	0.000201583	1.272	0.57562
'MSMEG_0309 '	0.0813967	-1.08939	0.000245114	0.000296805	0.000292675	0.000179415	1.63127	1.08939
'MSMEG_0311 '	NaN	#VALUE!	0	0	1.03309e-07	0	#DIV/0!	#VALUE!
'MSMEG_0312 '	0.201935	-0.694789	2.28532e-05	2.30412e-05	1.53931e-05	2.46792e-05	0.623727	0.694789
'MSMEG_0313 '	0.446452	-0.350225	0.000229228	0.000215997	0.000238437	0.00026612	0.895977	0.350225
'MSMEG_0314 '	0.904754	-0.0434693	0.000142135	0.000118919	0.000165604	0.000166093	0.997059	0.0434693
'MSMEG_0315 '	0.000948362	-3.02303	5.36492e-05	1.37592e-05	3.51251e-05	1.0374e-05	3.38588	3.02303
'MSMEG_0316 '	0.00420816	-2.37591	4.04111e-06	7.97159e-06	1.10541e-05	3.06852e-05	0.360242	2.37591
'MSMEG_0317 '	NaN	#VALUE!	0	0	1.03309e-07	0	#DIV/0!	#VALUE!
'MSMEG_0318 '	0.150358	-0.822875	0.00026741	0.000263936	0.000440923	0.000319956	1.37808	0.822875
'MSMEG_0319 '	NaN	#VALUE!	0	0	1.03309e-07	0	#DIV/0!	#VALUE!
'MSMEG_0320 '	0.68698	-0.163056	0.00019885	0.000191755	0.000187093	0.000175157	1.06815	0.163056
'MSMEG_0321 '	0.548397	-0.260905	0.000137816	9.98087e-05	0.000150315	0.000129074	1.16456	0.260905
'MSMEG_0322 '	0.139883	-0.854235	0.00033583	0.000276603	0.00026788	0.000207371	1.2918	0.854235
'MSMEG_0323 '	0.60439	-0.218683	0.000319805	0.000310455	0.000269947	0.000246573	1.09479	0.218683
'MSMEG_0324 '	0.00463955	-2.33352	0.000185752	9.12911e-05	9.98999e-05	0.000165656	0.603056	2.33352
'MSMEG_0325 '	0.80144	-0.0961289	5.16983e-05	8.63771e-05	8.523e-05	7.86239e-05	1.08402	0.0961289
'MSMEG_0326 '	0.134379	-0.871667	0.000439645	0.000594812	0.000691551	0.00052951	1.30602	0.871667
'MSMEG_0327 '	0.403269	-0.394405	0.000319944	0.000453616	0.00041179	0.000339721	1.21214	0.394405
'MSMEG_0328 '	0.0353729	-1.45133	0.000107995	8.24459e-05	2.73769e-05	5.08871e-05	0.537993	1.45133
'MSMEG_0329 '	0.000331788	-3.47914	4.47309e-05	2.5116e-05	0.000103206	4.07315e-05	2.5338	3.47914
'MSMEG_0330 '	0.548648	-0.260706	0.0002525	0.000232705	0.000195254	0.000210319	0.928372	0.260706
'MSMEG_0331 '	0.370892	-0.430753	8.16582e-05	0.000110947	0.000102689	0.000122522	0.838127	0.430753
'MSMEG_0332 '	0.0616041	-1.21039	0.000161226	0.000136281	0.000210957	0.000132023	1.59789	1.21039
'MSMEG_0333 '	0.827571	-0.082195	0.000105905	0.000189243	9.928e-05	9.67511e-05	1.02614	0.082195
'MSMEG_0334 '	0.00896521	-2.04744	0.000229507	0.000190335	0.000130583	0.000205187	0.63641	2.04744
'MSMEG_0335 '	0.681121	-0.166776	4.05504e-05	4.75019e-05	2.22115e-05	1.99836e-05	1.11149	0.166776
'MSMEG_0336 '	0.00694775	-2.15816	2.41073e-05	4.45535e-05	5.99193e-06	2.30412e-05	0.260053	2.15816
'MSMEG_0337 '	0.000354249	-3.45069	0.000172653	0.000191209	0.000240917	0.000104941	2.29573	3.45069
'MSMEG_0338 '	0.254289	-0.594673	0.000230204	0.000328364	0.00032811	0.000264919	1.23853	0.594673
'MSMEG_0339 '	0.00220355	-2.65688	0.000157185	0.000134971	0.00028534	0.00015834	1.80207	2.65688
'MSMEG_0340 '	0.815029	-0.0888272	0.000110782	2.8392e-05	6.12623e-05	6.09335e-05	1.0054	0.0888272
'MSMEG_0341 '	0.000948362	-3.02303	3.69274e-05	6.97787e-05	1.06408e-05	3.45072e-05	0.308366	3.02303
'MSMEG_0342 '	0.853906	-0.0685898	0.000404529	0.000409936	0.000502289	0.00047764	1.0516	0.0685898
'MSMEG_0343 '	0.0286644	-1.54266	2.03449e-05	5.24159e-05	3.92575e-05	1.97652e-05	1.98619	1.54266
'MSMEG_0344 '	0.0555558	-1.25527	2.49434e-05	2.10756e-05	5.47538e-05	2.93748e-05	1.86397	1.25527
'MSMEG_0345 '	0.391298	-0.407492	0.000261557	0.000239366	0.000130273	0.000156483	0.832502	0.407492
'MSMEG_0346 '	0.313948	-0.503143	0.000124996	0.000188479	0.000123764	0.000149931	0.825473	0.503143
'MSMEG_0347 '	0.960449	-0.0175256	5.30918e-05	0.000100245	8.75028e-05	8.40839e-05	1.04066	0.0175256
'MSMEG_0348 '	0.490339	-0.309503	0.000333182	0.000350422	0.000336891	0.000354026	0.9516	0.309503
'MSMEG_0349 '	0.0302999	-1.51856	0.000167497	0.000135735	0.000210441	0.000132459	1.58872	1.51856
'MSMEG_0350 '	1.92141e-05	-4.71638	2.04842e-05	0	0	2.21676e-05	0	4.71638
'MSMEG_0351 '	0.886469	-0.0523363	0.000230622	0.000202566	0.000241847	0.000232814	1.0388	0.0523363
'MSMEG_0352 '	0.184409	-0.734218	4.41735e-05	1.76904e-05	4.26667e-05	5.75483e-05	0.741406	0.734218
'MSMEG_0353 '	0.00484791	-2.31445	2.07629e-05	5.64563e-05	5.75432e-05	2.30412e-05	2.49741	2.31445
'MSMEG_0354 '	0.680007	-0.167486	5.65755e-05	4.42259e-05	6.36384e-05	5.44907e-05	1.16788	0.167486
'MSMEG_0355 '	0.00538134	-2.26911	9.64292e-05	0.000108435	0.000157753	7.80779e-05	2.02046	2.26911
'MSMEG_0356 '	0.855052	-0.0680073	8.52813e-05	0.000139776	9.62841e-05	8.87795e-05	1.08453	0.0680073
'MSMEG_0357 '	1.47575e-06	-5.83099	0.00016903	0.000140868	0.000303522	0.000112803	2.69072	5.83099
'MSMEG_0358 '	0.0497876	-1.30288	0.00015607	0.000127327	0.00018668	0.000122631	1.52228	1.30288
'MSMEG_0360 '	0.00386961	-2.41233	1.99268e-05	1.9656e-05	0	1.10292e-05	0	2.41233
'MSMEG_0361 '	2.26946e-08	-7.64408	0.00037652	0.000194157	0.00039774	0.000132023	3.01267	7.64408
'MSMEG_0362 '	0.97309	-0.0118471	0.000206515	0.000141632	0.000232962	0.000217199	1.07258	0.0118471
'MSMEG_0364 '	0.00668311	-2.17502	4.43128e-05	5.74391e-05	3.11993e-05	1.11384e-05	2.80107	2.17502
'MSMEG_0365 '	0.451088	-0.345739	0.000236335	0.000193721	0.000310444	0.000326726	0.950166	0.345739
'MSMEG_0366 '	0.00386961	-2.41233	0	1.7472e-06	0	8.08079e-06	0	2.41233
'MSMEG_0367 '	0.738165	-0.131847	0.000210277	0.000184985	0.000214263	0.000201692	1.06233	0.131847
'MSMEG_0368 '	0.414681	-0.382286	4.19439e-05	4.96859e-05	6.10557e-05	4.42259e-05	1.38054	0.382286
'MSMEG_0369 '	0.35766	-0.44653	1.88121e-05	1.01556e-05	1.85956e-06	6.66119e-06	0.279164	0.44653
'MSMEG_0370 '	0.225448	-0.646953	0.000150078	8.21183e-05	7.91348e-05	0.000100355	0.788551	0.646953
'MSMEG_0371 '	0.969867	-0.0132877	4.04111e-05	1.65984e-05	2.15916e-05	1.92192e-05	1.12344	0.0132877
'MSMEG_0373 '	0.198319	-0.702636	0.000146455	0.000135954	0.000146492	9.81707e-05	1.49222	0.702636
'MSMEG_0374 '	0.000481674	-3.31725	8.79289e-05	8.20091e-05	4.90718e-05	0.000112476	0.436288	3.31725
'MSMEG_0375 '	2.2261e-05	-4.65245	0.000343355	0.000370952	0.000546195	0.000258585	2.11224	4.65245
'MSMEG_0376 '	0.10682	-0.971347	1.82547e-05	4.87031e-05	4.63858e-05	2.74092e-05	1.69235	0.971347
'MSMEG_0377 '	0.299685	-0.523335	0.000233269	0.000203767	0.000296187	0.000353152	0.838695	0.523335
'MSMEG_0378 '	0.00409883	-2.38734	3.80421e-05	5.73299e-05	8.32671e-05	3.98579e-05	2.0891	2.38734
'MSMEG_0379 '	0.000109872	-3.95911	0.000104929	6.84683e-05	0.000175006	7.77503e-05	2.25087	3.95911
'MSMEG_0380 '	0.452738	-0.344153	1.57464e-05	4.91399e-06	6.61178e-06	1.10292e-05	0.59948	0.344153
'MSMEG_0381 '	0.354761	-0.450064	0.000194809	0.000147311	0.000165811	0.000133988	1.2375	0.450064
'MSMEG_0382 '	0.549838	-0.259765	0.000192162	0.000115752	0.00015796	0.000135189	1.16843	0.259765
'MSMEG_0383 '	0.690412	-0.160892	6.93956e-05	8.64863e-05	4.38031e-05	5.14331e-05	0.85165	0.160892
'MSMEG_0384 '	0.0177623	-1.7505	1.30988e-05	1.1466e-05	0	5.67839e-06	0	1.7505
'MSMEG_0385 '	0.123674	-0.907721	0.000749695	0.000693638	0.000722234	0.00086115	0.838685	0.907721
'MSMEG_0386 '	NaN	#VALUE!	0	9.28199e-06	0	4.14959e-06	0	#VALUE!
'MSMEG_0387 '	0.939609	-0.0270528	0.000670127	0.00068512	0.000636487	0.000590225	1.07838	0.0270528
'MSMEG_0388 '	0.000551115	-3.25876	0.000136144	9.75155e-05	9.98999e-05	0.000197215	0.506553	3.25876
'MSMEG_0390 '	0.210283	-0.677196	0.000773663	0.000647883	0.000494644	0.000597323	0.828101	0.677196
'MSMEG_0391 '	0.455114	-0.34188	0.000616339	0.000460605	0.000499293	0.000444334	1.12369	0.34188
'MSMEG_0392 '	0.516766	-0.286706	0.000160948	0.000154081	0.000130583	0.000146983	0.88842	0.286706
'MSMEG_0393 '	0.856397	-0.067325	0.000339592	0.000301282	0.000411687	0.000345836	1.19041	0.067325
'MSMEG_0394 '	3.3817e-08	-7.47086	2.1599e-05	6.22439e-06	2.89265e-06	5.01227e-05	0.0577114	7.47086
'MSMEG_0396 '	0.0506592	-1.29534	0.000127643	0.000135517	0.000132339	0.000192083	0.688969	1.29534
'MSMEG_0397 '	0.631383	-0.199707	0.000345445	0.000374665	0.000363235	0.000346928	1.047	0.199707
'MSMEG_0398 '	0.616391	-0.210144	0.000312698	0.000309036	0.000305588	0.000310455	0.984323	0.210144
'MSMEG_0399 '	0.040734	-1.39004	2.31319e-05	6.55199e-06	1.85956e-05	5.89679e-06	3.15352	1.39004
'MSMEG_0400 '	0.00281048	-2.55122	0.00351033	0.00251313	0.00279492	0.00169402	1.64988	2.55122
'MSMEG_0401 '	9.77885e-05	-4.00971	0.000844173	0.000517389	0.000790624	0.000406442	1.94523	4.00971
'MSMEG_0402 '	0.0171978	-1.76453	0.00232879	0.00173901	0.00192992	0.00126497	1.52566	1.76453
'MSMEG_0403 '	0.922509	-0.0350292	0.000163874	0.000253344	0.000205792	0.000191864	1.07259	0.0350292
'MSMEG_0404 '	0.998398	-0.000696099	0.000148685	0.000177559	0.000143083	0.000133661	1.0705	0.000696099
'MSMEG_0405 '	0.422179	-0.374504	0.00035938	0.000320502	0.000407864	0.000442369	0.922001	0.374504
'MSMEG_0406 '	0.333866	-0.476427	0.000376102	0.00039847	0.000578531	0.000468904	1.23379	0.476427
'MSMEG_0407 '	0.0128766	-1.8902	0.000170145	0.000202129	0.000200006	0.000117717	1.69904	1.8902
'MSMEG_0408 '	0.0606349	-1.21728	0.00167176	0.00225498	0.00157929	0.00205132	0.769888	1.21728
'MSMEG_0409 '	0.401378	-0.396446	0.000202055	0.000211411	0.000204449	0.000227136	0.900117	0.396446
'MSMEG_0410 '	0.472461	-0.325634	0.000965407	0.00103685	0.000860151	0.00100136	0.858981	0.325634
'MSMEG_0411 '	0.162443	-0.7893	0.000171956	0.000232486	0.000209717	0.000257166	0.815495	0.7893
'MSMEG_0412 '	0.289865	-0.537804	0.000525483	0.000654762	0.000543819	0.000614577	0.884867	0.537804
'MSMEG_0413 '	0.000744795	-3.12796	0.000207072	0.000179525	8.40936e-05	0.000162162	0.518578	3.12796
'MSMEG_0414 '	0.00753087	-2.12315	0.000415259	0.000320065	0.000272943	0.000404367	0.674987	2.12315
'MSMEG_0416 '	0.185761	-0.731046	6.59119e-05	0.000108654	0.000105892	7.69859e-05	1.37547	0.731046
'MSMEG_0417 '	0.615103	-0.211052	0.000152308	0.00017472	0.000179241	0.00018564	0.965533	0.211052
'MSMEG_0418 '	0.178718	-0.747832	0.000374987	0.000404695	0.000474602	0.000355009	1.33687	0.747832
'MSMEG_0419 '	0.474508	-0.323757	0.000232991	0.000173409	0.000207858	0.000231504	0.89786	0.323757
'MSMEG_0420 '	6.83072e-05	-4.16553	2.94025e-05	4.88123e-05	5.74399e-05	1.3104e-05	4.38339	4.16553
'MSMEG_0422 '	0.0312322	-1.5054	3.90176e-06	3.36336e-05	2.89265e-06	1.34316e-05	0.215362	1.5054
'MSMEG_0423 '	0.0434673	-1.36184	5.74116e-05	5.00135e-05	7.98579e-05	0.000119792	0.666637	1.36184
'MSMEG_0424 '	9.64235e-08	-7.01582	0.000146455	0.000147529	0.000186783	5.39447e-05	3.46249	7.01582
'MSMEG_0425 '	0.926428	-0.0331885	7.58056e-05	3.74556e-05	5.32042e-05	5.53643e-05	0.960983	0.0331885
'MSMEG_0426 '	0.0650031	-1.18707	0.0001668	0.000125798	0.000202176	0.000137264	1.4729	1.18707
'MSMEG_0427 '	0.953759	-0.0205613	0.000241352	0.000407534	0.000376458	0.000350204	1.07497	0.0205613
'MSMEG_0428 '	0.000220368	-3.65685	4.8772e-06	7.01063e-05	5.49604e-05	1.38684e-05	3.963	3.65685
'MSMEG_0429 '	0.0778301	-1.10885	4.54276e-05	6.55199e-05	6.70476e-05	0.000107343	0.624608	1.10885
'MSMEG_0430 '	0.185208	-0.732339	0.00044062	0.000395085	0.000335548	0.00040262	0.833411	0.732339
'MSMEG_0431 '	0.0405772	-1.39172	0.000223654	0.000204641	0.000216742	0.000291127	0.744495	1.39172
'MSMEG_0432 '	0.00134629	-2.87086	5.5182e-05	2.93748e-05	9.72138e-05	4.04039e-05	2.40605	2.87086
'MSMEG_0433 '	0.282041	-0.549688	0.000477965	0.000525797	0.00046985	0.000379251	1.23889	0.549688
'MSMEG_0434 '	0.108364	-0.965114	0.000207072	0.000168168	0.000116739	0.000153644	0.759803	0.965114
'MSMEG_0435 '	0.536252	-0.270631	3.46978e-05	8.96531e-05	8.23373e-05	8.85611e-05	0.929724	0.270631
'MSMEG_0436 '	0.00656693	-2.18264	6.38216e-05	1.22304e-05	2.99596e-05	6.44279e-05	0.46501	2.18264
'MSMEG_0437 '	0.0879364	-1.05583	0.000590698	0.000595248	0.000390095	0.000493256	0.790858	1.05583
'MSMEG_0438 '	4.17935e-08	-7.37889	4.26406e-05	5.11055e-05	8.47134e-06	6.94511e-05	0.121976	7.37889
'MSMEG_0439 '	0.00136343	-2.86537	0.00016262	0.000124269	0.000176762	8.56127e-05	2.06467	2.86537
'MSMEG_0441 '	0.964859	-0.0155361	0.000108274	0.000159541	0.000167671	0.000159323	1.0524	0.0155361
'MSMEG_0442 '	0.826986	-0.0825017	0.000153144	0.000152552	0.000223974	0.000218072	1.02706	0.0825017
'MSMEG_0443 '	0.898529	-0.0464678	0.000167358	0.000164892	0.000122421	0.000119137	1.02757	0.0464678
'MSMEG_0444 '	0.318364	-0.497076	0.0003081	0.000313622	0.000501256	0.000390826	1.28255	0.497076
'MSMEG_0445 '	0.294959	-0.530238	0.000182407	0.000247665	0.000277178	0.000230958	1.20013	0.530238
'MSMEG_0446 '	0.405713	-0.391781	0.000624421	0.000596013	0.000588035	0.000643515	0.913787	0.391781
'MSMEG_0447 '	4.42603e-07	-6.35399	9.55931e-05	1.53972e-05	9.0912e-06	5.98415e-05	0.151921	6.35399
'MSMEG_0448 '	0.220702	-0.656193	0.000178784	0.000198962	0.000213437	0.000255418	0.835635	0.656193
'MSMEG_0449 '	0.105326	-0.977463	0.000324961	0.000433196	0.000481937	0.000375648	1.28295	0.977463
'MSMEG_0450 '	0.111317	-0.95344	0	3.69096e-05	2.90299e-05	4.41167e-05	0.658023	0.95344
'MSMEG_0451 '	6.48461e-05	-4.18812	7.26006e-05	4.60823e-05	1.18805e-05	5.05595e-05	0.234981	4.18812
'MSMEG_0452 '	0.722379	-0.141235	0.000155931	0.000136718	0.000140707	0.00013923	1.01061	0.141235
'MSMEG_0453 '	0.0837599	-1.07696	2.92632e-05	4.69559e-05	4.5456e-05	6.90143e-05	0.658646	1.07696
'MSMEG_0454 '	0.0808095	-1.09254	4.19439e-05	1.82364e-05	6.43616e-05	3.77832e-05	1.70345	1.09254
'MSMEG_0455 '	0.674894	-0.170764	0.000335969	0.000258585	0.000300113	0.000280534	1.06979	0.170764
'MSMEG_0456 '	0.680557	-0.167135	7.62236e-05	5.86403e-05	0.000101243	8.72507e-05	1.16037	0.167135
'MSMEG_0457 '	0.0154432	-1.81126	0.000199826	0.000153426	0.000153207	0.000228337	0.670971	1.81126
'MSMEG_0458 '	0.935946	-0.0287492	0.000177669	0.000180835	0.000215399	0.000212394	1.01415	0.0287492
'MSMEG_0459 '	0.000113783	-3.94392	0.00017321	0.000119683	7.57256e-05	0.000163035	0.464473	3.94392
'MSMEG_0460 '	1.82103e-05	-4.73968	6.7584e-05	7.10891e-05	9.14285e-05	2.48976e-05	3.67219	4.73968
'MSMEG_0461 '	0.000137329	-3.86224	0.000165267	0.000177996	9.928e-05	0.000214796	0.462206	3.86224
'MSMEG_0462 '	0.547967	-0.261245	0.000157743	0.000135299	0.000171183	0.000183347	0.933659	0.261245
'MSMEG_0463 '	0.42383	-0.372808	0.000613552	0.000556919	0.000637624	0.000508435	1.25409	0.372808
'MSMEG_0464 '	0.000629356	-3.2011	7.74778e-05	0.000158886	9.60774e-05	0.000182582	0.526215	3.2011
'MSMEG_0465 '	0.954927	-0.02003	9.74046e-05	0.000137592	0.000121285	0.000119901	1.01154	0.02003
'MSMEG_0466 '	0.836398	-0.0775873	0.00044703	0.00041627	0.000592684	0.000518263	1.1436	0.0775873
'MSMEG_0467 '	0.0302042	-1.51993	1.29594e-05	1.092e-05	5.76465e-05	2.91564e-05	1.97715	1.51993
'MSMEG_0468 '	0.0213899	-1.66979	7.48302e-05	0.000125143	0.000146802	9.01991e-05	1.62754	1.66979
'MSMEG_0469 '	0.000146177	-3.83512	0.000275771	0.000288506	0.000344019	0.000159869	2.15189	3.83512
'MSMEG_0470 '	0.192145	-0.716371	0.000227556	0.000276494	0.000299906	0.000218181	1.37457	0.716371
'MSMEG_0471 '	0.293696	-0.532102	1.25414e-05	1.10292e-05	2.30379e-05	3.1122e-05	0.740247	0.532102
'MSMEG_0472 '	0.575998	-0.239579	0.000237868	0.000221567	0.000244326	0.000210756	1.15929	0.239579
'MSMEG_0473 '	0.323762	-0.489774	7.32973e-05	0.0001638	0.000141533	0.00015692	0.901945	0.489774
'MSMEG_0474 '	0.838348	-0.0765756	7.51089e-05	9.26015e-05	6.58079e-05	6.66119e-05	0.98793	0.0765756
'MSMEG_0475 '	0.814656	-0.0890256	0.00042557	0.000348348	0.000387822	0.000354244	1.09479	0.0890256
'MSMEG_0476 '	0.0239414	-1.62085	0.000459432	0.000352934	0.000433485	0.000290799	1.49067	1.62085
'MSMEG_0478 '	0.89646	-0.047469	0.000372757	0.000391918	0.000443093	0.000478732	0.925554	0.047469
'MSMEG_0479 '	0.995057	-0.00215193	0.000130152	0.000121212	0.000135232	0.000131804	1.026	0.00215193
'MSMEG_0480 '	0.906434	-0.042664	6.86988e-05	8.11355e-05	4.23567e-05	4.05131e-05	1.04551	0.042664
'MSMEG_0481 '	0.166227	-0.779299	0.000345584	0.000248976	0.000386583	0.000300081	1.28826	0.779299
'MSMEG_0482 '	0.489803	-0.309978	0.000171259	0.000141632	0.00012676	0.000105487	1.20167	0.309978
'MSMEG_0483 '	0.58336	-0.234063	0.000150078	0.000144908	9.27716e-05	0.000102866	0.901866	0.234063
'MSMEG_0484 '	0.120573	-0.918752	0.000248458	0.000254763	0.00028441	0.00020333	1.39876	0.918752
'MSMEG_0485 '	0.826333	-0.0828447	0.000238147	0.000374665	0.00038462	0.000328801	1.16977	0.0828447
'MSMEG_0486 '	0.00390785	-2.40806	6.82808e-05	0.000119901	0.000106408	0.000183456	0.580022	2.40806
'MSMEG_0487 '	0.0908205	-1.04182	4.89113e-05	2.91564e-05	1.72526e-05	6.66119e-06	2.59002	1.04182
'MSMEG_0488 '	0.829964	-0.0809408	0.000209859	0.000151351	0.000136678	0.000122522	1.11554	0.0809408
'MSMEG_0489 '	0.0517793	-1.28584	0.000117889	7.70951e-05	0.000175729	0.000107671	1.63209	1.28584
'MSMEG_0490 '	0.390423	-0.408464	8.38878e-05	7.73135e-05	0.000104032	8.23367e-05	1.2635	0.408464
'MSMEG_0491 '	5.14996e-08	-7.2882	5.88051e-05	7.69859e-05	0.000110541	1.8564e-05	5.95458	7.2882
'MSMEG_0492 '	0.0365152	-1.43753	0.000185194	9.80615e-05	0.000195874	0.000128747	1.52139	1.43753
'MSMEG_0494 '	0.000288019	-3.54058	2.55008e-05	1.95468e-05	4.85553e-06	2.70816e-05	0.179293	3.54058
'MSMEG_0495 '	0.786024	-0.104564	5.72722e-05	4.30247e-05	5.72332e-05	5.38355e-05	1.06311	0.104564
'MSMEG_0496 '	0.000108873	-3.96308	5.71329e-05	2.26044e-05	1.84923e-05	1.5288e-06	12.096	3.96308
'MSMEG_0497 '	0.177763	-0.750158	9.1552e-05	0.000129074	7.06634e-05	9.34751e-05	0.75596	0.750158
'MSMEG_0499 '	0.207138	-0.683741	0.000436161	0.000470324	0.000443919	0.000355992	1.24699	0.683741
'MSMEG_0500 '	0.152875	-0.815663	0.000205957	0.000174283	0.000348255	0.000240458	1.4483	0.815663
'MSMEG_0501 '	3.01124e-05	-4.52125	4.76572e-05	5.82035e-05	2.24181e-05	7.40375e-05	0.302793	4.52125
'MSMEG_0502 '	0.270627	-0.567628	4.77965e-05	3.35244e-05	8.96723e-05	6.34451e-05	1.41338	0.567628
'MSMEG_0503 '	0.00010822	-3.96569	3.10747e-05	7.09799e-06	5.9816e-05	1.5288e-05	3.91261	3.96569
'MSMEG_0504 '	0.798026	-0.0979832	0.000170981	0.000208463	0.000198457	0.000197433	1.00518	0.0979832
'MSMEG_0505 '	0.00448647	-2.3481	0.000129594	0.000152661	0.000235545	0.000125471	1.87729	2.3481
'MSMEG_0506 '	0.0832591	-1.07957	5.74116e-05	9.50039e-06	6.92171e-06	1.67076e-05	0.414286	1.07957
'MSMEG_0507 '	0.229902	-0.638458	8.75109e-05	0.0001092	0.000155067	0.000116407	1.33211	0.638458
'MSMEG_0508 '	0.142433	-0.84639	0.000112872	7.61123e-05	7.43825e-05	4.72835e-05	1.57312	0.84639
'MSMEG_0509 '	0.994494	-0.00239778	3.55339e-05	3.07944e-05	2.47942e-05	2.16216e-05	1.14673	0.00239778
'MSMEG_0510 '	0.0542717	-1.26543	0.000148127	0.000173955	0.000163848	0.000108763	1.50647	1.26543
'MSMEG_0511 '	0.0769079	-1.11403	5.85264e-05	7.14167e-05	5.87829e-05	8.87795e-05	0.662122	1.11403
'MSMEG_0512 '	0.150395	-0.822768	1.99268e-05	1.90008e-05	1.38434e-05	2.35872e-05	0.586905	0.822768
'MSMEG_0513 '	0.000551232	-3.25867	4.83539e-05	5.76575e-05	4.26667e-05	0.000102975	0.414338	3.25867
'MSMEG_0514 '	0.0545619	-1.26311	0.000198293	0.000123614	0.000209201	0.00013508	1.54872	1.26311
'MSMEG_0515 '	0.000693635	-3.15887	9.1552e-05	8.96531e-05	2.56207e-05	6.87959e-05	0.372415	3.15887
'MSMEG_0516 '	0.107397	-0.969006	0.000135586	0.000155828	0.000193291	0.000138575	1.39485	0.969006
'MSMEG_0517 '	3.95308e-10	-9.40306	2.1181e-05	4.80479e-06	6.0849e-05	0	#DIV/0!	9.40306
'MSMEG_0518 '	0.00762182	-2.11794	0.000298763	0.000197761	0.00017139	0.000267103	0.641662	2.11794
'MSMEG_0519 '	0.369051	-0.432914	3.73454e-05	1.08108e-05	2.841e-05	2.39148e-05	1.18797	0.432914
'MSMEG_0520 '	0.629623	-0.200919	0.000127643	0.000133988	8.86392e-05	7.78595e-05	1.13845	0.200919
'MSMEG_0521 '	0.790501	-0.102098	0.000226302	0.000291891	0.000265918	0.000250395	1.06199	0.102098
'MSMEG_0523 '	0.896847	-0.0472816	0.000277304	0.000221785	0.000303832	0.000277368	1.09541	0.0472816
'MSMEG_0524 '	0.354781	-0.450039	5.49033e-05	9.81707e-05	0.00011271	8.69231e-05	1.29667	0.450039
'MSMEG_0525 '	0.00474209	-2.32403	0	4.80479e-06	8.67796e-06	0	#DIV/0!	2.32403
'MSMEG_0526 '	0.00230071	-2.63814	0.000237868	0.000265465	0.000267157	0.000134971	1.97937	2.63814
'MSMEG_0527 '	0.531847	-0.274213	1.81153e-06	5.67839e-06	1.42567e-05	8.95439e-06	1.59214	0.274213
'MSMEG_0528 '	0.0015239	-2.81704	0.000124578	0.000106251	0.000167567	7.81871e-05	2.14316	2.81704
'MSMEG_0529 '	0.00291183	-2.53583	0.000380003	0.000401419	0.000364371	0.000215561	1.69034	2.53583
'MSMEG_0530 '	0.88796	-0.0516066	0.000148685	9.99179e-05	9.16352e-05	9.23831e-05	0.991904	0.0516066
'MSMEG_0531 '	0.0322267	-1.49178	0.000270754	0.000348784	0.000230792	0.000334916	0.689106	1.49178
'MSMEG_0532 '	0.0035636	-2.44811	6.25675e-05	7.04339e-05	3.06828e-05	6.81407e-05	0.450286	2.44811
'MSMEG_0533 '	0.0828574	-1.08167	0.000118725	9.58775e-05	0.000144529	9.22739e-05	1.56631	1.08167
'MSMEG_0534 '	0.623906	-0.204881	0.000301968	0.000311547	0.000276145	0.000256183	1.07792	0.204881
'MSMEG_0535 '	0.00135818	-2.86704	1.36562e-05	2.8392e-06	0	1.33224e-05	0	2.86704
'MSMEG_0536 '	0.0041128	-2.38586	5.5182e-05	0.000102975	0.000132546	6.87959e-05	1.92665	2.38586
'MSMEG_0537 '	0.193802	-0.712641	0.000338478	0.000238165	0.000302592	0.000366256	0.826176	0.712641
'MSMEG_0538 '	0.0720348	-1.14246	5.39279e-05	5.84219e-05	5.88862e-05	3.549e-05	1.65924	1.14246
'MSMEG_0539 '	0.116344	-0.934255	0.000311305	0.00031395	0.000237198	0.000298334	0.795074	0.934255
'MSMEG_0540 '	0.0424125	-1.37251	0.000444243	0.000459404	0.000553427	0.000406442	1.36164	1.37251
'MSMEG_0541 '	0.75167	-0.123973	7.80352e-05	9.70787e-05	0.000119115	0.000110838	1.07468	0.123973
'MSMEG_0542 '	0.00342108	-2.46584	0.000230204	0.000204531	0.000118496	0.000206388	0.57414	2.46584
'MSMEG_0543 '	0.0106211	-1.97383	6.54938e-05	6.43187e-05	3.18192e-05	6.36635e-05	0.499803	1.97383
'MSMEG_0544 '	0.30431	-0.516683	8.36091e-06	6.47555e-05	0.000156307	0.000118809	1.31561	0.516683
'MSMEG_0545 '	0.511714	-0.290972	1.08692e-05	2.79552e-05	2.20048e-05	2.93748e-05	0.749107	0.290972
'MSMEG_0546 '	0.426538	-0.370042	0.000488417	0.000432868	0.000515822	0.000592628	0.870399	0.370042
'MSMEG_0547 '	0.460736	-0.336548	0.000196899	0.000163581	0.000220772	0.000188807	1.1693	0.336548
'MSMEG_0548 '	0.332298	-0.478473	0.00014966	0.000155719	0.000133682	0.000145345	0.919756	0.478473
'MSMEG_0549 '	0.0813976	-1.08939	0.000108831	0.000108108	6.82873e-05	9.83891e-05	0.694054	1.08939
'MSMEG_0550 '	0.0514906	-1.28827	0.000280787	0.000320174	0.000329556	0.000225825	1.45934	1.28827
'MSMEG_0551 '	0.214911	-0.667742	3.60913e-05	3.1668e-05	2.93398e-05	4.30247e-05	0.681928	0.667742
'MSMEG_0552 '	0.374778	-0.426226	2.77304e-05	1.11384e-05	7.43825e-06	4.04039e-06	1.84097	0.426226
'MSMEG_0553 '	3.21194e-05	-4.49323	0.000220449	0.000214032	0.00029815	0.000135626	2.19832	4.49323
'MSMEG_0554 '	0.245597	-0.609777	1.14266e-05	1.2012e-05	2.78935e-05	3.7674e-05	0.740391	0.609777
'MSMEG_0555 '	0.926618	-0.0330994	0.000126807	0.000156047	0.00022635	0.000215342	1.05112	0.0330994
'MSMEG_0556 '	0.221262	-0.655093	0.000215572	0.000125798	0.000174799	0.000128091	1.36464	0.655093
'MSMEG_0557 '	0.572962	-0.241874	1.32381e-05	1.9656e-05	9.71105e-06	1.38684e-05	0.70023	0.241874
'MSMEG_0558 '	0.000918618	-3.03686	1.08692e-05	0	0	1.22304e-05	0	3.03686
'MSMEG_0559 '	0.854594	-0.0682403	9.4757e-06	1.1466e-05	6.87005e-05	6.41003e-05	1.07177	0.0682403
'MSMEG_0560 '	0.806755	-0.0932584	0.000161226	0.000112585	0.000146389	0.000135517	1.08023	0.0932584
'MSMEG_0561 '	0.0254488	-1.59433	0.000284132	0.000269614	0.000208684	0.000309363	0.674561	1.59433
'MSMEG_0562 '	0.631713	-0.19948	0.000149939	0.000156811	0.000191328	0.000153207	1.24882	0.19948
'MSMEG_0563 '	0.461884	-0.335467	0.000179899	0.000160742	0.000219945	0.000183565	1.19819	0.335467
'MSMEG_0564 '	0.00232058	-2.6344	0.000158579	0.000165547	9.59741e-05	0.000170461	0.563027	2.6344
'MSMEG_0565 '	0.17174	-0.765128	0.000107298	0.000152989	0.000215916	0.000153535	1.4063	0.765128
'MSMEG_0566 '	0.00900681	-2.04543	0.00012611	0.000164455	0.000151038	8.56127e-05	1.7642	2.04543
'MSMEG_0567 '	0.0231416	-1.63561	7.45515e-05	5.05595e-05	1.59096e-05	4.13867e-05	0.384413	1.63561
'MSMEG_0568 '	0.0348717	-1.45753	8.20763e-05	6.35543e-05	6.16755e-05	3.55992e-05	1.7325	1.45753
'MSMEG_0569 '	0.487888	-0.31168	0.000150775	0.000174283	0.000222838	0.000247228	0.901343	0.31168
'MSMEG_0570 '	0.00104615	-2.9804	2.34106e-05	6.44279e-06	3.56416e-05	8.29919e-06	4.29459	2.9804
'MSMEG_0571 '	0.00174962	-2.75706	8.62567e-05	0.000108763	8.12009e-05	0.000150696	0.53884	2.75706
'MSMEG_0572 '	0.99453	-0.00238191	0.000111339	9.86075e-05	0.000120252	0.000114114	1.05379	0.00238191
'MSMEG_0573 '	0.0053935	-2.26813	2.35499e-05	3.2214e-05	5.73365e-05	2.46792e-05	2.32328	2.26813
'MSMEG_0574 '	0.373367	-0.427864	1.11479e-05	2.17308e-05	1.98353e-05	2.66448e-05	0.744437	0.427864
'MSMEG_0575 '	0.00135818	-2.86704	1.42135e-05	1.13568e-05	0	1.2558e-05	0	2.86704
'MSMEG_0576 '	0.066756	-1.17551	0.000161505	0.000188151	0.000139674	0.000175484	0.795934	1.17551
'MSMEG_0577 '	0.0049302	-2.30714	0.000126947	9.98087e-05	4.71089e-05	8.99807e-05	0.523545	2.30714
'MSMEG_0578 '	0.170666	-0.767854	0.000185055	0.000314386	0.000241123	0.00018018	1.33824	0.767854
'MSMEG_0579 '	0.294565	-0.530819	2.46647e-05	6.36635e-05	6.60145e-05	5.02319e-05	1.31419	0.530819
'MSMEG_0580 '	1.62744e-06	-5.78849	0.00010911	8.75783e-05	0.000118289	3.14496e-05	3.76123	5.78849
'MSMEG_0581 '	0.232576	-0.633436	0.00017321	0.000175484	0.000116843	0.000144581	0.808148	0.633436
'MSMEG_0582 '	0.736102	-0.133062	0.000100331	9.12911e-05	4.74189e-05	4.79387e-05	0.989156	0.133062
'MSMEG_0583 '	0.756317	-0.121296	3.44191e-05	5.09963e-05	3.71913e-05	3.70188e-05	1.00466	0.121296
'MSMEG_0584 '	0.12256	-0.911653	0.000190211	0.000139667	0.00028441	0.000340267	0.835844	0.911653
'MSMEG_0586 '	0.0141798	-1.84833	1.44922e-05	1.60524e-05	3.61582e-05	1.59432e-05	2.26794	1.84833
'MSMEG_0587 '	0.012036	-1.91952	6.73053e-05	7.56755e-05	0.000119425	6.57383e-05	1.81668	1.91952
'MSMEG_0588 '	0.114204	-0.942319	0.000651872	0.000690908	0.000903748	0.000679442	1.33013	0.942319
'MSMEG_0589 '	0.848061	-0.0715729	0.000191465	0.000105378	0.000148455	0.000141086	1.05223	0.0715729
'MSMEG_0590 '	0.991642	-0.00364515	0.000115381	0.000130057	0.000210647	0.000188588	1.11697	0.00364515
'MSMEG_0591 '	0.0312779	-1.50476	0.000191465	0.000252688	0.000175729	0.000257275	0.683039	1.50476
'MSMEG_0592 '	0.0496778	-1.30384	4.45915e-05	6.55199e-05	5.29976e-05	3.02484e-05	1.75208	1.30384
'MSMEG_0593 '	0.872006	-0.0594806	6.27068e-06	6.68303e-05	3.49185e-05	3.07944e-05	1.13392	0.0594806
'MSMEG_0594 '	0.222051	-0.653547	9.67079e-05	9.74063e-05	6.87005e-05	8.74691e-05	0.785427	0.653547
'MSMEG_0595 '	0.175654	-0.755341	0.000276467	0.000283483	0.000232239	0.000290581	0.799223	0.755341
'MSMEG_0596 '	0.913701	-0.0391961	0.000109946	0.000104504	0.000152588	0.000143925	1.06018	0.0391961
'MSMEG_0597 '	0.613972	-0.211852	0.000446473	0.00042446	0.000429869	0.000387987	1.10795	0.211852
'MSMEG_0598 '	9.73457e-05	-4.01168	0.000110364	0.000107125	6.09524e-05	0.000135845	0.448692	4.01168
'MSMEG_0599 '	0.539259	-0.268203	0.000459711	0.000485939	0.000419641	0.000378159	1.1097	0.268203
'MSMEG_0600 '	0.00988652	-2.00496	6.20101e-05	6.19163e-05	2.20048e-05	4.89215e-05	0.449799	2.00496
'MSMEG_0601 '	0.54884	-0.260554	0.000122209	0.000123614	0.000150625	0.000139448	1.08015	0.260554
'MSMEG_0602 '	0.0046683	-2.33084	0.000108553	0.000144144	9.03954e-05	0.000157357	0.574461	2.33084
'MSMEG_0603 '	0.615206	-0.21098	0.000166521	0.000220147	0.000206515	0.000184329	1.12036	0.21098
'MSMEG_0604 '	0.0749713	-1.1251	0.000162062	0.000149058	0.000131926	0.00017057	0.773439	1.1251
'MSMEG_0605 '	0.588511	-0.230246	7.23219e-05	0.000118373	9.16352e-05	0.000100355	0.913113	0.230246
'MSMEG_0606 '	0.000789199	-3.10281	0.000143111	5.80943e-05	0.00012707	5.52551e-05	2.2997	3.10281
'MSMEG_0607 '	0.874213	-0.0583828	5.00261e-05	7.48019e-05	6.6531e-05	6.57383e-05	1.01206	0.0583828
'MSMEG_0608 '	0.604425	-0.218658	6.46577e-05	5.99507e-05	3.34721e-05	3.7128e-05	0.901535	0.218658
'MSMEG_0609 '	0.304876	-0.515877	0.000127783	0.000148512	0.000116119	0.000134207	0.865229	0.515877
'MSMEG_0610 '	0.911808	-0.0400968	0.000119979	0.000212612	0.000203622	0.000189462	1.07474	0.0400968
'MSMEG_0611 '	0.590587	-0.228716	0.000154119	0.000153317	9.57675e-05	9.86075e-05	0.971199	0.228716
'MSMEG_0612 '	0.353345	-0.451801	4.52883e-05	4.75019e-05	6.16755e-05	7.25087e-05	0.850595	0.451801
'MSMEG_0613 '	0.80561	-0.0938753	0.000351158	0.000313404	0.000346602	0.000324979	1.06654	0.0938753
'MSMEG_0614 '	0.0719694	-1.14285	0.000141021	0.000187387	9.78337e-05	0.000135845	0.720188	1.14285
'MSMEG_0615 '	0.0670253	-1.17376	9.96342e-05	0.000192956	0.000185646	0.000239475	0.775222	1.17376
'MSMEG_0616 '	0.000225417	-3.64701	3.37223e-05	3.2214e-05	4.03939e-05	9.74063e-05	0.414695	3.64701
'MSMEG_0617 '	0.894968	-0.0481923	0.000142972	0.000275293	0.000275835	0.000279442	0.987091	0.0481923
'MSMEG_0618 '	0.206654	-0.684756	7.80352e-06	2.21676e-05	2.98563e-05	1.53972e-05	1.93908	0.684756
'MSMEG_0619 '	0.278634	-0.554965	4.83539e-05	0.000110401	8.04778e-05	9.96995e-05	0.807204	0.554965
'MSMEG_0620 '	0.0207696	-1.68257	2.50827e-06	1.19028e-05	2.79968e-05	8.29919e-06	3.37343	1.68257
'MSMEG_0621 '	0.000454311	-3.34265	1.5189e-05	0.000110729	3.88442e-05	0.000106033	0.366341	3.34265
'MSMEG_0622 '	0.000373131	-3.42814	1.25414e-05	4.06223e-05	5.47538e-06	3.13404e-05	0.174707	3.42814
'MSMEG_0623 '	0.866059	-0.0624526	3.38617e-05	0.000146983	0.000235855	0.000213813	1.10309	0.0624526
'MSMEG_0624 '	0.471114	-0.326874	0.000125414	0.000153753	0.000146802	0.000122522	1.19817	0.326874
'MSMEG_0625 '	0.981628	-0.0080532	6.77234e-05	6.26807e-05	7.53123e-05	6.85775e-05	1.09821	0.0080532
'MSMEG_0626 '	0.433431	-0.36308	1.11479e-06	6.87959e-06	3.07861e-05	3.66912e-05	0.839061	0.36308
'MSMEG_0627 '	0.813212	-0.0897964	0.00021808	0.000140868	0.000145046	0.000139776	1.0377	0.0897964
'MSMEG_0628 '	0.83754	-0.0769942	0.000256401	0.000170352	0.000149075	0.000137046	1.08777	0.0769942
'MSMEG_0629 '	9.22486e-08	-7.03504	2.25745e-05	1.98744e-05	1.03309e-07	3.94211e-05	0.00262065	7.03504
'MSMEG_0630 '	0.218733	-0.660085	5.69935e-05	2.28228e-05	5.57869e-05	3.81108e-05	1.46381	0.660085
'MSMEG_0631 '	4.53665e-05	-4.34327	0.00015621	0.000264919	0.00014236	0.000307288	0.463278	4.34327
'MSMEG_0632 '	0.181271	-0.741672	9.29455e-05	0.000213267	0.000165088	0.000222877	0.740713	0.741672
'MSMEG_0633 '	0.487106	-0.312376	0.000257377	0.000234998	0.00031127	0.000271252	1.14753	0.312376
'MSMEG_0634 '	0.259484	-0.585889	9.89375e-05	0.000117936	0.000126554	9.45671e-05	1.33824	0.585889
'MSMEG_0635 '	0.0715758	-1.14523	6.68873e-05	7.09799e-05	6.6841e-05	0.000100136	0.6675	1.14523
'MSMEG_0636 '	0.0973286	-1.01176	0.000184637	0.00018291	0.000184923	0.000249194	0.742085	1.01176
'MSMEG_0637 '	0.290988	-0.536125	0.00041066	0.00055408	0.000487309	0.000395631	1.23173	0.536125
'MSMEG_0638 '	0.0246081	-1.60892	0.000112036	9.48947e-05	8.01678e-05	0.000128091	0.625864	1.60892
'MSMEG_0639 '	0.0546257	-1.2626	0.000219195	0.000146109	0.000146802	0.000103849	1.41361	1.2626
'MSMEG_0640 '	0.000835763	-3.07792	0.000110921	0.000165656	5.34108e-05	0.000108981	0.490091	3.07792
'MSMEG_0641 '	0.592543	-0.22728	0.000551681	0.000470979	0.000403835	0.000441932	0.913795	0.22728
'MSMEG_0642 '	0.753679	-0.122814	0.000901724	0.00053497	0.000502805	0.000471962	1.06535	0.122814
'MSMEG_0643 '	0.00782333	-2.10661	0.00135795	0.00135157	0.000783909	0.00115326	0.679734	2.10661
'MSMEG_0644 '	0.00707898	-2.15003	0.000137398	0.000102648	0.000153724	0.00023882	0.643681	2.15003
'MSMEG_0645 '	0.100858	-0.996292	0.000352552	0.000517171	0.000378215	0.000463881	0.815327	0.996292
'MSMEG_0646 '	1.96544e-05	-4.70654	8.01254e-05	8.39747e-05	2.11784e-05	7.18535e-05	0.294744	4.70654
'MSMEG_0647 '	0.696568	-0.157036	0.000128479	0.000162162	0.000122318	0.000106907	1.14416	0.157036
'MSMEG_0648 '	0.0175152	-1.75659	2.56401e-05	5.14331e-05	1.14673e-05	2.57712e-05	0.444967	1.75659
'MSMEG_0649 '	0.744838	-0.127938	3.38617e-05	1.93284e-05	2.74802e-05	3.04668e-05	0.901974	0.127938
'MSMEG_0650 '	0.886493	-0.0523249	0.000152726	0.00012962	0.000170667	0.000155937	1.09446	0.0523249
'MSMEG_0651 '	0.00925872	-2.03345	0.000410939	0.000422494	0.000376872	0.000227136	1.65924	2.03345
'MSMEG_0652 '	0.534897	-0.27173	6.50758e-05	9.16187e-05	0.000121388	0.000100573	1.20696	0.27173
'MSMEG_0653 '	0.670344	-0.173703	7.44121e-05	3.99671e-05	6.9527e-05	5.94047e-05	1.1704	0.173703
'MSMEG_0654 '	0.130215	-0.885339	0.000168054	0.000161179	0.000243706	0.000162162	1.50286	0.885339
'MSMEG_0655 '	3.60074e-06	-5.44361	4.04111e-05	3.26508e-05	3.16126e-05	9.93719e-05	0.318124	5.44361
'MSMEG_0656 '	0.501442	-0.299779	5.49033e-05	4.80479e-05	2.88232e-05	3.58176e-05	0.804724	0.299779
'MSMEG_0657 '	0.789722	-0.102526	0.000153841	0.000183347	0.000167154	0.000168932	0.989475	0.102526
'MSMEG_0658 '	0.00189922	-2.72142	5.89444e-05	3.92027e-05	1.79758e-05	4.70651e-05	0.381934	2.72142
'MSMEG_0659 '	0.0631739	-1.19946	0.000282878	0.000266775	0.000252487	0.000335899	0.751677	1.19946
'MSMEG_0660 '	0.604111	-0.218884	0.000129037	0.000196232	0.000205792	0.000180835	1.13801	0.218884
'MSMEG_0661 '	0.235649	-0.627735	0.00013252	8.27735e-05	0.000102586	0.000131804	0.77832	0.627735
'MSMEG_0662 '	2.55774e-05	-4.59214	9.81014e-05	0.00010232	0.000182031	6.87959e-05	2.64595	4.59214
'MSMEG_0663 '	0.708821	-0.149463	8.91831e-06	1.86732e-05	2.14883e-05	1.72536e-05	1.24544	0.149463
'MSMEG_0664 '	0.000629611	-3.20093	0.000196899	0.000224515	0.000130066	0.00024428	0.532447	3.20093
'MSMEG_0665 '	0.22467	-0.648454	0.000109946	0.000107671	0.000183374	0.000143816	1.27506	0.648454
'MSMEG_0666 '	0.235569	-0.627882	2.77304e-05	6.94511e-05	5.53737e-05	3.75648e-05	1.47409	0.627882
'MSMEG_0667 '	0.288452	-0.539926	0.000150914	0.00018018	0.000154344	0.000182255	0.846858	0.539926
'MSMEG_0669 '	0.258782	-0.587066	5.50427e-05	6.99971e-05	7.83083e-05	5.48183e-05	1.42851	0.587066
'MSMEG_0670 '	0.105947	-0.974912	0.000146177	0.000132132	0.000210027	0.000154627	1.35828	0.974912
'MSMEG_0671 '	0.00719817	-2.14278	0.000309075	0.000288288	0.000434001	0.000249085	1.74238	2.14278
'MSMEG_0672 '	0.430392	-0.366136	2.34106e-05	5.11055e-05	3.19225e-05	4.22603e-05	0.755377	0.366136
'MSMEG_0673 '	0.219354	-0.658854	6.63299e-05	7.89515e-05	4.09104e-05	5.88587e-05	0.695061	0.658854
'MSMEG_0674 '	0.0333054	-1.47749	3.58126e-05	5.36171e-05	5.14479e-05	8.10263e-05	0.634953	1.47749
'MSMEG_0675 '	0.847223	-0.0720025	0.00031869	0.000362653	0.000276765	0.000272235	1.01664	0.0720025
'MSMEG_0676 '	1.39271e-05	-4.85614	5.11409e-05	6.62843e-05	1.61162e-05	6.28991e-05	0.256223	4.85614
'MSMEG_0677 '	0.000451953	-3.34491	6.4379e-05	7.81871e-05	5.67167e-05	0.000121212	0.467914	3.34491
'MSMEG_0678 '	0.0270239	-1.56825	2.22958e-06	0	0	5.35079e-06	0	1.56825
'MSMEG_0679 '	0.560272	-0.251601	0.000195506	0.000202238	0.000245256	0.000201037	1.21995	0.251601
'MSMEG_0680 '	0.00199891	-2.69921	0.000159833	0.000248211	0.00022883	0.000120775	1.89468	2.69921
'MSMEG_0681 '	0.377271	-0.423347	0.000118446	6.08243e-05	9.28749e-05	0.000113568	0.817792	0.423347
'MSMEG_0682 '	0.0794873	-1.0997	7.59449e-05	2.85012e-05	5.49604e-05	3.30876e-05	1.66106	1.0997
'MSMEG_0683 '	0.718729	-0.143435	2.96812e-05	1.48512e-05	7.91348e-05	6.93419e-05	1.14123	0.143435
'MSMEG_0684 '	0.375414	-0.42549	0.000434489	0.000388096	0.000492164	0.000396614	1.24092	0.42549
'MSMEG_0685 '	0.811028	-0.0909641	4.83539e-05	4.95767e-05	3.63648e-05	3.96395e-05	0.917387	0.0909641
'MSMEG_0686 '	0.0016127	-2.79245	1.07298e-05	3.30876e-05	3.66747e-05	1.08108e-05	3.39242	2.79245
'MSMEG_0687 '	0.0998445	-1.00068	0.000179342	0.000173409	0.000158786	0.000214359	0.740747	1.00068
'MSMEG_0688 '	0.249486	-0.602953	4.45915e-06	6.55199e-06	1.80791e-05	9.28199e-06	1.94776	0.602953
'MSMEG_0689 '	0.153708	-0.813305	7.83139e-05	8.04803e-05	4.92784e-05	6.87959e-05	0.716299	0.813305
'MSMEG_0691 '	0.789877	-0.102441	6.77234e-05	5.54735e-05	6.97336e-05	7.39283e-05	0.94326	0.102441
'MSMEG_0692 '	0.0139703	-1.8548	0.000375405	0.000376412	0.000338957	0.00020879	1.62343	1.8548
'MSMEG_0694 '	0.439791	-0.356753	0.000324125	0.000276166	0.000287303	0.000329128	0.872919	0.356753
'MSMEG_0695 '	0.338092	-0.470965	0.000103954	8.16815e-05	8.3577e-05	8.87795e-05	0.9414	0.470965
'MSMEG_0697 '	0.000108873	-3.96308	1.04511e-05	0	1.90089e-05	0	#DIV/0!	3.96308
'MSMEG_0698 '	0.931036	-0.0310334	0.000343355	0.000249412	0.000314473	0.000277586	1.13288	0.0310334
'MSMEG_0699 '	0.0431247	-1.36527	0.000114823	7.77503e-05	0.000128516	7.91699e-05	1.6233	1.36527
'MSMEG_0700 '	0.204658	-0.688971	0.000187563	0.000151023	0.000168704	0.000205296	0.82176	0.688971
'MSMEG_0701 '	0.807905	-0.0926397	4.51489e-05	4.60823e-05	4.61792e-05	4.08407e-05	1.13071	0.0926397
'MSMEG_0702 '	0.335066	-0.47487	0.000135447	0.000209445	0.000184097	0.000144908	1.27044	0.47487
'MSMEG_0703 '	0.132792	-0.876829	9.4339e-05	0.000145782	0.000163228	0.000220147	0.741452	0.876829
'MSMEG_0704 '	0.153964	-0.812581	0.000151054	0.000149385	9.24616e-05	0.000118373	0.781106	0.812581
'MSMEG_0705 '	0.0709752	-1.14889	0.00018617	0.000267212	0.000278935	0.000186186	1.49815	1.14889
'MSMEG_0706 '	0.495458	-0.304993	2.92632e-05	3.85476e-05	2.22115e-05	2.93748e-05	0.756141	0.304993
'MSMEG_0707 '	0.00355964	-2.44859	6.1174e-05	9.32567e-05	5.31009e-05	0.000106579	0.49823	2.44859
'MSMEG_0708 '	0.00241316	-2.61741	1.39349e-07	3.90935e-05	4.72123e-05	1.56156e-05	3.02341	2.61741
'MSMEG_0709 '	NaN	#VALUE!	2.50827e-06	7.42559e-06	0	1.092e-07	0	#VALUE!
'MSMEG_0710 '	0.00135818	-2.86704	8.77896e-06	7.64399e-07	1.23971e-05	0	#DIV/0!	2.86704
'MSMEG_0711 '	7.07435e-06	-5.15031	3.51158e-05	3.34152e-05	4.00839e-05	1.638e-06	24.4713	5.15031
'MSMEG_0712 '	0.846831	-0.0722031	0.000133357	0.000139994	9.28749e-05	8.60495e-05	1.07932	0.0722031
'MSMEG_0713 '	NaN	#VALUE!	0	0	2.06618e-06	0	#DIV/0!	#VALUE!
'MSMEG_0714 '	0.00365311	-2.43734	0.000215015	0.00026208	0.000314163	0.000168495	1.86452	2.43734
'MSMEG_0715 '	0.00172176	-2.76403	4.8772e-05	5.32895e-05	5.33075e-05	2.05296e-05	2.59662	2.76403
'MSMEG_0716 '	0.00403042	-2.39465	0.000373593	0.000448811	0.000292985	0.000469232	0.624392	2.39465
'MSMEG_0717 '	0.000268332	-3.57133	0.000223236	0.000194485	0.000118599	0.000226262	0.524166	3.57133
'MSMEG_0718 '	0.00176625	-2.75295	0.000389479	0.000273873	0.000393194	0.000209882	1.87341	2.75295
'MSMEG_0719 '	1.96861e-06	-5.70584	6.84201e-05	2.59896e-05	6.17788e-05	9.17279e-06	6.73501	5.70584
'MSMEG_0720 '	0.811798	-0.0905522	0.000237729	0.000245044	0.000262095	0.000250832	1.0449	0.0905522
'MSMEG_0721 '	0.121545	-0.915262	0.000201498	0.000206279	0.000159199	0.000113677	1.40045	0.915262
'MSMEG_0722 '	0.696337	-0.157181	7.92893e-05	0.000122741	9.37013e-05	9.63143e-05	0.972871	0.157181
'MSMEG_0723 '	0.513886	-0.289134	0.000150218	8.44115e-05	0.000229243	0.000199508	1.14904	0.289134
'MSMEG_0724 '	0.120507	-0.918986	2.52221e-05	2.19492e-05	3.06828e-05	1.64892e-05	1.86078	0.918986
'MSMEG_0725 '	0.98923	-0.00470264	0.000322174	0.000316352	0.000302799	0.000308926	0.980165	0.00470264
'MSMEG_0727 '	0.991102	-0.00388174	2.45253e-05	1.2558e-05	1.07441e-05	1.07016e-05	1.00398	0.00388174
'MSMEG_0728 '	0.0114639	-1.94067	9.58718e-05	0.000118482	0.000117876	6.03875e-05	1.95199	1.94067
'MSMEG_0729 '	0.0222644	-1.65239	2.56401e-05	5.40539e-05	4.58692e-05	7.77503e-05	0.589956	1.65239
'MSMEG_0730 '	0.0765344	-1.11614	0.000290681	0.000359814	0.000279554	0.000198198	1.41048	1.11614
'MSMEG_0731 '	0.0362779	-1.44036	0.000145201	0.000114114	0.000206102	0.000130931	1.57413	1.44036
'MSMEG_0732 '	0.0127304	-1.89516	0.000187842	0.000127545	0.0003278	0.000198635	1.65027	1.89516
'MSMEG_0733 '	0.382336	-0.417554	0.000192162	0.000190226	0.000147422	0.000119137	1.23742	0.417554
'MSMEG_0734 '	0.718346	-0.143667	0.000356454	0.000394539	0.000432142	0.000392464	1.1011	0.143667
'MSMEG_0735 '	0.0264513	-1.57755	0.000271033	0.000175375	0.00023978	0.000158667	1.51121	1.57755
'MSMEG_0736 '	0.214911	-0.667742	1.39349e-05	1.8018e-05	4.26667e-05	2.91564e-05	1.46337	0.667742
'MSMEG_0737 '	0.501875	-0.299405	8.05434e-05	0.00013781	0.000139571	0.00015146	0.9215	0.299405
'MSMEG_0738 '	0.0527609	-1.27769	0.000286361	0.000148184	0.00018544	0.000254654	0.728203	1.27769
'MSMEG_0739 '	6.84304e-05	-4.16475	3.02386e-05	2.77368e-05	4.02905e-05	5.24159e-06	7.6867	4.16475
'MSMEG_0740 '	0.078258	-1.10647	0.000236753	0.000289707	0.000288336	0.000196451	1.46773	1.10647
'MSMEG_0741 '	0.257238	-0.589665	6.41003e-05	8.20091e-05	0.000141327	0.000109855	1.28648	0.589665
'MSMEG_0742 '	3.056e-07	-6.51485	3.05173e-05	2.97024e-05	7.28329e-05	1.35408e-05	5.37878	6.51485
'MSMEG_0743 '	0.0416477	-1.38041	0.000129733	9.46763e-05	0.000147732	9.17279e-05	1.61055	1.38041
'MSMEG_0744 '	0.0264049	-1.57832	9.7962e-05	0.000117827	7.9548e-05	4.48811e-05	1.77241	1.57832
'MSMEG_0745 '	0.00516378	-2.28703	5.1559e-05	5.47091e-05	2.14883e-05	4.78295e-05	0.449268	2.28703
'MSMEG_0746 '	0.00866319	-2.06232	0.000512942	0.000676602	0.00045301	0.000650285	0.696633	2.06232
'MSMEG_0747 '	0.485038	-0.314224	4.73785e-05	4.59731e-05	6.39483e-05	5.19791e-05	1.23027	0.314224
'MSMEG_0748 '	0.228026	-0.642015	0.0001753	0.000194267	0.000217776	0.000173082	1.25822	0.642015
'MSMEG_0749 '	0.915935	-0.0381354	4.89113e-05	3.86568e-05	3.30589e-05	3.276e-05	1.00913	0.0381354
'MSMEG_0750 '	0.319449	-0.495598	6.7166e-05	3.24324e-05	7.83083e-05	5.61287e-05	1.39516	0.495598
'MSMEG_0751 '	0.206216	-0.685678	7.32973e-05	0.000199945	0.000134612	0.000161288	0.834604	0.685678
'MSMEG_0752 '	0.0326241	-1.48646	0.000435882	0.000432213	0.000531009	0.000353589	1.50177	1.48646
'MSMEG_0753 '	0.00608555	-2.2157	0.000151611	8.97623e-05	0.000119115	6.25715e-05	1.90367	2.2157
'MSMEG_0754 '	1.87107e-06	-5.72791	7.20432e-05	0.000174174	2.73769e-05	0.000103958	0.263345	5.72791
'MSMEG_0755 '	0.00492725	-2.3074	0.000205678	0.000234998	0.000268087	0.000149495	1.79329	2.3074
'MSMEG_0756 '	0.455505	-0.341506	0.000107298	0.000141414	9.34947e-05	8.45207e-05	1.10618	0.341506
'MSMEG_0757 '	1.45299e-07	-6.83774	0.0001668	0.000137701	4.50428e-05	0.000166639	0.270301	6.83774
'MSMEG_0758 '	0.0988953	-1.00482	1.12872e-05	1.4196e-06	9.29782e-06	2.0748e-06	4.48131	1.00482
'MSMEG_0760 '	0.453572	-0.343353	0.000106462	0.000131695	0.000119322	0.000135626	0.879786	0.343353
'MSMEG_0761 '	0.075347	-1.12293	9.01585e-05	8.11355e-05	4.5456e-05	6.70487e-05	0.677955	1.12293
'MSMEG_0762 '	0.880458	-0.0552914	6.85595e-05	0.000105815	8.80193e-05	8.87795e-05	0.991438	0.0552914
'MSMEG_0763 '	0.354764	-0.45006	0.000344609	0.000298006	0.000306415	0.000336336	0.911039	0.45006
'MSMEG_0764 '	0.667019	-0.175862	0.00041289	0.000473709	0.000524397	0.000467703	1.12122	0.175862
'MSMEG_0765 '	0.398017	-0.400098	0.000353527	0.000338083	0.000363131	0.000301938	1.20267	0.400098
'MSMEG_0766 '	0.178086	-0.749371	0.00043421	0.000382418	0.000402699	0.000297897	1.3518	0.749371
'MSMEG_0767 '	1.91303e-07	-6.71828	0.000115102	7.37099e-05	0.000181824	5.44907e-05	3.33679	6.71828
'MSMEG_0768 '	0.0238789	-1.62199	0.000147709	0.000153207	0.000167051	9.59867e-05	1.74035	1.62199
'MSMEG_0769 '	0.7475	-0.126389	0.000127225	9.16187e-05	9.50444e-05	8.43023e-05	1.12742	0.126389
'MSMEG_0770 '	0.916632	-0.0378048	5.4764e-05	6.11519e-05	5.12413e-05	5.03411e-05	1.01788	0.0378048
'MSMEG_0771 '	0.384188	-0.415456	0.000169727	0.000213704	0.000204655	0.000240676	0.850334	0.415456
'MSMEG_0772 '	0.961402	-0.0170948	0.000371643	0.000383947	0.00041179	0.000414086	0.994456	0.0170948
'MSMEG_0773 '	0.466712	-0.330951	0.0001027	0.000103085	0.000223044	0.000183893	1.21291	0.330951
'MSMEG_0774 '	0.135766	-0.86721	5.25344e-05	6.32267e-05	6.72542e-05	9.60959e-05	0.699866	0.86721
'MSMEG_0775 '	0.0846153	-1.07255	0.000164989	9.60959e-05	0.000180688	0.000120884	1.49472	1.07255
'MSMEG_0776 '	0.317976	-0.497606	1.74186e-05	1.35408e-05	2.06618e-05	1.15752e-05	1.78501	0.497606
'MSMEG_0777 '	0.240085	-0.619634	0.000277443	0.000389516	0.000258996	0.000313622	0.825822	0.619634
'MSMEG_0778 '	0.210691	-0.676355	0.000142554	0.000119574	0.00011302	8.10263e-05	1.39486	0.676355
'MSMEG_0779 '	0.110212	-0.95777	0.000145062	7.66583e-05	0.000141637	9.59867e-05	1.47559	0.95777
'MSMEG_0780 '	0.0782522	-1.1065	8.04041e-05	0.000112148	7.94447e-05	0.000115206	0.689589	1.1065
'MSMEG_0781 '	0.00296499	-2.52798	0.000229089	0.000274638	0.000193601	0.000300955	0.64329	2.52798
'MSMEG_0782 '	0.826317	-0.0828531	0.00043212	0.000304886	0.000360652	0.000356974	1.0103	0.0828531
'MSMEG_0783 '	0.00018419	-3.73473	0.000361609	0.000247665	0.000544439	0.000268522	2.02754	3.73473
'MSMEG_0784 '	3.66068e-05	-4.43644	0.000103536	8.67047e-05	6.40516e-05	0.000158449	0.404241	4.43644
'MSMEG_0785 '	0.319326	-0.495766	0.000106602	0.000155173	0.000119632	0.000142069	0.842069	0.495766
'MSMEG_0786 '	0.0177623	-1.7505	3.60913e-05	9.39119e-06	4.13236e-07	6.22439e-06	0.0663898	1.7505
'MSMEG_0787 '	0.00111859	-2.95133	1.04511e-05	1.365e-05	1.405e-05	1.2012e-06	11.6967	2.95133
'MSMEG_0788 '	0.97331	-0.0117489	3.10747e-05	1.01556e-05	8.57465e-06	8.73599e-06	0.981532	0.0117489
'MSMEG_0790 '	0.164671	-0.783382	8.15189e-05	0.000103958	6.45682e-05	4.26971e-05	1.51224	0.783382
'MSMEG_0791 '	0.000131152	-3.88222	4.5985e-06	2.19492e-05	8.13042e-05	2.68632e-05	3.02661	3.88222
'MSMEG_0794 '	9.44216e-05	-4.02493	8.58387e-05	5.76575e-05	3.22324e-05	8.94347e-05	0.360402	4.02493
'MSMEG_0795 '	0.01233	-1.90904	0.00014325	0.00017745	0.0001686	8.97623e-05	1.8783	1.90904
'MSMEG_0796 '	0.0523995	-1.28067	0.000249434	0.000306524	0.000179758	0.000244498	0.73521	1.28067
'MSMEG_0797 '	0.840821	-0.0752964	0.000898798	0.000936935	0.000858498	0.000830137	1.03416	0.0752964
'MSMEG_0798 '	0.0014992	-2.82414	5.86657e-05	9.33659e-05	0.000109611	4.69559e-05	2.33434	2.82414
'MSMEG_0800 '	0.101099	-0.995254	1.95088e-05	4.07315e-05	1.96287e-05	3.47256e-05	0.565253	0.995254
'MSMEG_0801 '	0.785876	-0.104646	0.000327051	0.000307725	0.000316126	0.000312967	1.01009	0.104646
'MSMEG_0802 '	0.960143	-0.017664	0.000306288	0.000316243	0.000298667	0.000296696	1.00664	0.017664
'MSMEG_0803 '	0.359094	-0.444791	0.000192858	0.000223969	0.000217466	0.000258913	0.839918	0.444791
'MSMEG_0804 '	0.000918618	-3.03686	2.4386e-05	4.91399e-06	0	1.13568e-05	0	3.03686
'MSMEG_0805 '	0.0172	-1.76447	0.000115938	7.46927e-05	0.000124901	0.000194048	0.643658	1.76447
'MSMEG_0806 '	0.270125	-0.568436	0.000246229	0.000309472	0.000287096	0.000335025	0.856938	0.568436
'MSMEG_0807 '	0.00135385	-2.86843	0.000198432	0.000215561	0.000167981	0.000295604	0.568262	2.86843
'MSMEG_0808 '	0.374009	-0.427118	0.000192301	0.000183565	0.000216949	0.00024832	0.873666	0.427118
'MSMEG_0809 '	0.802231	-0.0957004	3.09354e-05	6.03875e-05	0.000105375	9.80615e-05	1.07458	0.0957004
'MSMEG_0810 '	0.171469	-0.765815	0.000135168	0.000128419	0.000119425	8.88887e-05	1.34354	0.765815
'MSMEG_0811 '	0.482537	-0.316469	0.000150496	9.12911e-05	0.000122421	0.00013235	0.92498	0.316469
'MSMEG_0812 '	0.814814	-0.0889413	0.000590002	0.000514987	0.000558489	0.000504722	1.10653	0.0889413
'MSMEG_0813 '	0.394551	-0.403897	3.66487e-05	3.24324e-05	5.49604e-05	6.35543e-05	0.864779	0.403897
'MSMEG_0814 '	0.947993	-0.0231948	3.24682e-05	1.28856e-05	2.89265e-05	2.97024e-05	0.97388	0.0231948
'MSMEG_0815 '	0.243932	-0.612731	0.000263229	0.000184329	0.000173559	0.000133661	1.29851	0.612731
'MSMEG_0816 '	0.80335	-0.0950951	0.000413726	0.000345618	0.000419951	0.000411137	1.02144	0.0950951
'MSMEG_0817 '	0.746209	-0.127139	0.000363421	0.00030838	0.000337821	0.000293529	1.15089	0.127139
'MSMEG_0818 '	0.849993	-0.0705844	0.000171677	0.00016926	0.000214056	0.000218727	0.978645	0.0705844
'MSMEG_0819 '	0.391571	-0.40719	1.10085e-05	2.2386e-05	2.99596e-05	3.87659e-05	0.772834	0.40719
'MSMEG_0821 '	0.333819	-0.476489	0.000116913	9.56591e-05	0.000157443	0.0001187	1.32639	0.476489
'MSMEG_0822 '	0.0500997	-1.30016	0.000213621	0.000262516	0.000165088	0.000237946	0.693803	1.30016
'MSMEG_0823 '	0.00835284	-2.07817	0.000155234	0.000158231	0.00021168	0.000123723	1.71092	2.07817
'MSMEG_0824 '	0.14072	-0.851646	6.29855e-05	5.49275e-05	8.7916e-05	6.02783e-05	1.4585	0.851646
'MSMEG_0826 '	0.0183363	-1.73669	5.88051e-05	7.79687e-05	5.17579e-05	8.99807e-05	0.575211	1.73669
'MSMEG_0827 '	0.230989	-0.636409	0.000301132	0.00037117	0.000351561	0.000266994	1.31674	0.636409
'MSMEG_0828 '	2.3186e-05	-4.63477	6.38216e-05	6.78131e-05	2.76868e-05	8.64863e-05	0.32013	4.63477
'MSMEG_0829 '	0.0510408	-1.29208	0.000172235	0.000168714	0.000167877	0.000109309	1.5358	1.29208
'MSMEG_0830 '	0.776239	-0.110004	0.000112733	8.17907e-05	9.94866e-05	0.000102975	0.96612	0.110004
'MSMEG_0831 '	0.327774	-0.484425	9.16913e-05	0.000147311	0.000126347	0.000148184	0.852635	0.484425
'MSMEG_0833 '	0.479454	-0.319253	7.10677e-06	7.64399e-06	1.12607e-05	1.24488e-05	0.904561	0.319253
'MSMEG_0834 '	0.992406	-0.00331045	7.94287e-06	3.1668e-06	1.33269e-05	1.22304e-05	1.08965	0.00331045
'MSMEG_0836 '	0.0404893	-1.39266	0.000194391	0.000224297	0.000170977	0.000227463	0.751666	1.39266
'MSMEG_0837 '	0.0502818	-1.29859	1.72792e-05	2.4024e-05	6.50847e-06	1.55064e-05	0.419729	1.29859
'MSMEG_0838 '	0.427453	-0.369111	0.000233409	0.000104067	0.000132132	0.000107343	1.23093	0.369111
'MSMEG_0839 '	0.191947	-0.716819	3.72061e-05	2.81736e-05	7.23164e-06	1.1466e-05	0.630703	0.716819
'MSMEG_0840 '	0.317976	-0.497606	3.90176e-06	0	2.06618e-05	1.23396e-05	1.67443	0.497606
'MSMEG_0841 '	0.397884	-0.400244	0.000665668	0.000633796	0.000589688	0.00069189	0.852286	0.400244
'MSMEG_0842 '	0.459926	-0.337312	6.45184e-05	6.71579e-05	7.70686e-05	6.31175e-05	1.22103	0.337312
'MSMEG_0843 '	NaN	#VALUE!	0	5.78759e-06	0	3.93119e-06	0	#VALUE!
'MSMEG_0844 '	0.0635262	-1.19705	0.000132938	0.000121758	0.000173353	0.000109637	1.58116	1.19705
'MSMEG_0845 '	0.738037	-0.131922	6.91169e-05	0.000224952	0.000159922	0.000145891	1.09618	0.131922
'MSMEG_0846 '	0.0441418	-1.35515	0.000967636	0.000826752	0.000930195	0.000658912	1.41171	1.35515
'MSMEG_0847 '	0.578705	-0.237543	8.11008e-05	9.15095e-05	7.7895e-05	8.70323e-05	0.895013	0.237543
'MSMEG_0848 '	0.0560519	-1.25141	0.00111033	0.000858529	0.000960155	0.000713293	1.34609	1.25141
'MSMEG_0849 '	0.45965	-0.337572	1.88121e-05	1.62708e-05	1.81824e-05	1.28856e-05	1.41107	0.337572
'MSMEG_0850 '	0.291835	-0.534863	0.000139488	0.000267321	0.00015827	0.000171881	0.920811	0.534863
'MSMEG_0851 '	0.000575201	-3.24018	0.000160669	0.000153426	0.000136161	0.000257384	0.52902	3.24018
'MSMEG_0852 '	0.976347	-0.0103957	1.36562e-05	1.44144e-05	2.86166e-05	2.75184e-05	1.03991	0.0103957
'MSMEG_0853 '	0.308475	-0.51078	3.6788e-05	5.20883e-05	4.04972e-05	2.82828e-05	1.43187	0.51078
'MSMEG_0854 '	0.0012703	-2.89609	3.10747e-05	4.32431e-05	3.72946e-05	8.29919e-06	4.49376	2.89609
'MSMEG_0855 '	0.184313	-0.734444	6.95349e-05	0.000103085	9.13252e-05	6.33359e-05	1.44192	0.734444
'MSMEG_0856 '	0.69896	-0.155547	0.000232712	0.000307507	0.000207238	0.000212066	0.977233	0.155547
'MSMEG_0857 '	1.39973e-07	-6.85396	2.18777e-05	1.15752e-05	6.53946e-05	1.092e-05	5.98853	6.85396
'MSMEG_0858 '	0.00600223	-2.22169	3.51158e-05	9.12911e-05	5.79564e-05	2.2932e-05	2.52732	2.22169
'MSMEG_0859 '	0.951284	-0.02169	0.000292075	0.000280425	0.000229036	0.000216762	1.05663	0.02169
'MSMEG_0862 '	0.0605549	-1.21785	9.00191e-05	0.000125689	4.246e-05	6.63935e-05	0.639521	1.21785
'MSMEG_0863 '	0.00414346	-2.38264	0.000184497	0.00014327	0.000240607	0.000135735	1.77262	2.38264
'MSMEG_0864 '	0.0607014	-1.2168	9.30848e-05	6.86867e-05	0.000105685	6.56291e-05	1.61034	1.2168
'MSMEG_0865 '	0.107047	-0.970426	0.000172932	0.000199071	0.000207651	0.000261424	0.794307	0.970426
'MSMEG_0866 '	NaN	#VALUE!	0	2.184e-07	1.03309e-07	1.092e-07	0.946055	#VALUE!
'MSMEG_0867 '	0.646385	-0.189508	7.21825e-05	0.00018968	9.78337e-05	0.000103412	0.946055	0.189508
'MSMEG_0868 '	0.00117657	-2.92938	0.000563943	0.000380889	0.000416232	0.00070827	0.587674	2.92938
'MSMEG_0869 '	NaN	#VALUE!	0	0	1.03309e-07	0	#DIV/0!	#VALUE!
'MSMEG_0870 '	0.00918498	-2.03692	0.00022895	0.000190226	0.000190295	0.000293092	0.649267	2.03692
'MSMEG_0871 '	0.00484014	-2.31514	4.19439e-05	4.57547e-05	6.59112e-05	2.43516e-05	2.70665	2.31514
'MSMEG_0873 '	0.0832591	-1.07957	0	3.21048e-05	1.54964e-05	5.02319e-06	3.08496	1.07957
'MSMEG_0874 '	0.342325	-0.465561	6.59119e-05	4.32431e-05	4.16336e-05	4.89215e-05	0.851027	0.465561
'MSMEG_0875 '	0.968657	-0.0138299	0.000267828	0.000329347	0.000286889	0.000273218	1.05004	0.0138299
'MSMEG_0876 '	0.145473	-0.837219	0.000124438	0.00011466	7.98579e-05	5.61287e-05	1.42276	0.837219
'MSMEG_0877 '	0.772124	-0.112313	0.000144226	0.000141195	0.000159613	0.000162271	0.983617	0.112313
'MSMEG_0878 '	0.0646425	-1.18948	3.46978e-05	4.21511e-05	3.17159e-05	1.5288e-05	2.07456	1.18948
'MSMEG_0881 '	0.000998005	-3.00087	0.000163177	0.000142506	0.000200316	9.81707e-05	2.04049	3.00087
'MSMEG_0882 '	0.0110063	-1.95836	6.93956e-05	4.91399e-05	7.98579e-05	0.000127655	0.625578	1.95836
'MSMEG_0883 '	0.416961	-0.379905	0.000270475	0.000255309	0.000376458	0.000300955	1.25088	0.379905
'MSMEG_0884 '	0.0614531	-1.21146	6.88382e-05	0.00012416	4.78321e-05	7.56755e-05	0.632069	1.21146
'MSMEG_0885 '	0.078822	-1.10335	0.000133775	0.000126453	7.63454e-05	0.000111275	0.686099	1.10335
'MSMEG_0886 '	0.000189999	-3.72125	0.000232991	0.000183019	0.000250008	0.000112476	2.22277	3.72125
'MSMEG_0887 '	0.000415837	-3.38108	0.000211531	0.000202675	0.000112917	0.000212831	0.530548	3.38108
'MSMEG_0888 '	0.000244242	-3.61218	7.39941e-05	6.97787e-05	4.29766e-05	0.00010374	0.414273	3.61218
'MSMEG_0889 '	0.227052	-0.643874	0.000528688	0.000548511	0.000545265	0.000407315	1.33868	0.643874
'MSMEG_0890 '	0.179596	-0.745703	0.000190907	0.000225935	0.000182341	0.000219819	0.829502	0.745703
'MSMEG_0891 '	0.242191	-0.615842	0.00029737	0.000320938	0.000384	0.00030707	1.25053	0.615842
'MSMEG_0892 '	0.96975	-0.0133402	9.07159e-05	3.75648e-05	8.59532e-05	8.45207e-05	1.01695	0.0133402
'MSMEG_0893 '	0.0170318	-1.76874	0.000104233	0.000152334	0.000118702	0.000181599	0.653648	1.76874
'MSMEG_0894 '	0.219243	-0.659074	0.000305452	0.000329893	0.000256826	0.00031111	0.825515	0.659074
'MSMEG_0895 '	0.901638	-0.0449677	0.000141299	0.000117062	0.000136781	0.000136827	0.999662	0.0449677
'MSMEG_0896 '	0.0171195	-1.76651	0.000448702	0.000447283	0.000278521	0.000436363	0.638279	1.76651
'MSMEG_0897 '	0.225106	-0.647613	0.000368159	0.000270597	0.000265401	0.000300846	0.882183	0.647613
'MSMEG_0898 '	0.599157	-0.22246	2.80091e-05	1.05924e-05	1.30169e-05	1.71444e-05	0.759254	0.22246
'MSMEG_0899 '	0.11793	-0.928376	0.000323428	0.000310892	0.000376252	0.000468467	0.803154	0.928376
'MSMEG_0900 '	0.231112	-0.636178	0.000753597	0.000761341	0.000825646	0.000674418	1.22423	0.636178
'MSMEG_0901 '	0.0866689	-1.06214	8.63961e-06	6.33359e-06	3.57449e-05	1.81272e-05	1.9719	1.06214
'MSMEG_0902 '	0.522804	-0.281661	0.000391151	0.00029484	0.000277798	0.000316461	0.877827	0.281661
'MSMEG_0904 '	0.0202385	-1.69382	4.61244e-05	5.92955e-05	5.47538e-05	2.42424e-05	2.2586	1.69382
'MSMEG_0905 '	5.86751e-07	-6.23155	3.44191e-05	4.85939e-05	7.85149e-06	5.54735e-05	0.141536	6.23155
'MSMEG_0906 '	0.968644	-0.0138356	0.000569099	0.000481135	0.000349288	0.000356101	0.980869	0.0138356
'MSMEG_0908 '	0.188147	-0.725502	0.000202055	0.000244826	0.000227693	0.000272672	0.835044	0.725502
'MSMEG_0909 '	0.0143179	-1.84412	0.000345863	0.000271034	0.000254244	0.000368113	0.690668	1.84412
'MSMEG_0910 '	5.21414e-07	-6.28282	1.07298e-05	1.8564e-06	6.42582e-05	1.08108e-05	5.9439	6.28282
'MSMEG_0911 '	0.402393	-0.39535	0.000352273	0.00035479	0.000189056	0.000216871	0.871743	0.39535
'MSMEG_0912 '	0.000645332	-3.19022	0.000202055	0.00016926	0.000153414	6.87959e-05	2.22999	3.19022
'MSMEG_0913 '	0.000406284	-3.39117	0.00012416	0.000225279	0.000112194	0.000217745	0.515254	3.39117
'MSMEG_0914 '	0.11842	-0.926576	0.000133078	0.000173191	0.000244739	0.000172208	1.42118	0.926576
'MSMEG_0915 '	0.0573256	-1.24165	0.000302526	0.000375538	0.000343709	0.000451651	0.761007	1.24165
'MSMEG_0916 '	0.717421	-0.144226	0.000218498	0.00023336	0.000170357	0.000179852	0.947204	0.144226
'MSMEG_0917 '	0.680961	-0.166878	9.29455e-05	0.000128747	7.81017e-05	8.09171e-05	0.965206	0.166878
'MSMEG_0918 '	0.726915	-0.138516	8.33304e-05	7.87331e-05	6.99402e-05	6.56291e-05	1.06569	0.138516
'MSMEG_0919 '	0.382982	-0.416821	0.000227835	0.000217417	0.000215813	0.000177996	1.21246	0.416821
'MSMEG_0920 '	0.63566	-0.196775	0.000124856	0.000101883	0.00014236	0.000152225	0.935197	0.196775
'MSMEG_0921 '	0.00821408	-2.08544	2.96812e-05	1.10292e-05	1.73559e-05	3.6036e-06	4.81628	2.08544
'MSMEG_0922 '	0.498404	-0.302419	0	0	6.71509e-06	1.04832e-05	0.640558	0.302419
'MSMEG_0923 '	NaN	#VALUE!	0	2.184e-07	1.03309e-07	0	#DIV/0!	#VALUE!
'MSMEG_0924 '	0.000819493	-3.08645	9.4757e-05	0.000193284	0.000128	0.000236308	0.541665	3.08645
'MSMEG_0925 '	0.0121487	-1.91547	8.2355e-05	0.0001187	0.000105685	0.000174174	0.60678	1.91547
'MSMEG_0926 '	0.0443618	-1.35299	0.000242048	0.000352716	0.000255897	0.000336117	0.761332	1.35299
'MSMEG_0927 '	0.00522371	-2.28202	5.60181e-05	8.31011e-05	1.69427e-05	4.18235e-05	0.405099	2.28202
'MSMEG_0928 '	0.146284	-0.834805	5.62968e-05	7.21811e-05	3.59516e-05	2.14032e-05	1.67973	0.834805
'MSMEG_0929 '	0.378663	-0.421747	0.000774081	0.000668849	0.000772752	0.000639147	1.20904	0.421747
'MSMEG_0930 '	0.236251	-0.626626	0.000161644	0.000159432	0.000250834	0.000194485	1.28974	0.626626
'MSMEG_0931 '	0.293489	-0.532407	4.5985e-05	5.66747e-05	5.07248e-05	6.02783e-05	0.841509	0.532407
'MSMEG_0932 '	0.885551	-0.0527864	0.000138791	0.000137046	0.000167361	0.000165984	1.0083	0.0527864
'MSMEG_0933 '	6.13684e-12	-11.2121	7.38547e-05	0.000108326	2.47942e-06	8.44115e-05	0.029373	11.2121
'MSMEG_0934 '	0.0134097	-1.87258	5.64362e-05	5.06687e-05	1.65295e-05	4.28063e-05	0.386145	1.87258
'MSMEG_0935 '	0.00123302	-2.90903	1.5189e-05	0	2.06618e-07	1.2558e-05	0.0164531	2.90903
'MSMEG_0936 '	NaN	#VALUE!	2.36892e-06	1.8018e-05	4.85553e-06	0	#DIV/0!	#VALUE!
'MSMEG_0938 '	0.00143762	-2.84236	7.44121e-05	3.83292e-05	1.41533e-05	4.23695e-05	0.334045	2.84236
'MSMEG_0939 '	0.00155549	-2.80813	4.79359e-05	5.30711e-05	6.30185e-05	2.28228e-05	2.76121	2.80813
'MSMEG_0940 '	NaN	#VALUE!	8.36091e-07	3.276e-07	3.61582e-06	1.4196e-06	2.54707	#VALUE!
'MSMEG_0941 '	5.44163e-08	-7.26427	0.000257516	0.000275402	0.000176452	4.90307e-05	3.5988	7.26427
'MSMEG_0942 '	0.123444	-0.908528	0.000145201	0.000123505	0.000118289	8.01527e-05	1.47579	0.908528
'MSMEG_0943 '	0.169086	-0.771893	8.19369e-05	6.22439e-05	3.72946e-05	5.35079e-05	0.696992	0.771893
'MSMEG_0944 '	NaN	#VALUE!	7.24612e-06	4.04039e-06	0	1.3104e-06	0	#VALUE!
'MSMEG_0945 '	0.0291975	-1.53465	0.000166382	7.77503e-05	0.000123868	7.27271e-05	1.70318	1.53465
'MSMEG_0946 '	0.0863401	-1.06379	0.000315624	0.000353152	0.000419951	0.000302811	1.38684	1.06379
'MSMEG_0947 '	0.0713399	-1.14667	0.000270754	0.000313622	0.000315299	0.000217417	1.45021	1.14667
'MSMEG_0950 '	0.110925	-0.954972	1.58857e-05	3.6036e-06	1.62195e-05	2.91564e-05	0.556295	0.954972
'MSMEG_0951 '	0.0401882	-1.3959	1.29594e-05	5.67839e-06	7.64487e-06	1.3104e-06	5.83401	1.3959
'MSMEG_0952 '	NaN	#VALUE!	1.39349e-07	1.092e-07	0	1.092e-07	0	#VALUE!
'MSMEG_0955 '	0.00537158	-2.2699	0.000140881	9.66419e-05	5.17579e-05	0.000100901	0.512958	2.2699
'MSMEG_0959 '	0.00120705	-2.91828	0.000104511	6.32267e-05	0.000162608	8.16815e-05	1.99076	2.91828
'MSMEG_0960 '	0.021421	-1.66916	9.48963e-05	7.13075e-05	3.69847e-05	7.01063e-05	0.527551	1.66916
'MSMEG_0961 '	0.591186	-0.228276	0.000706915	0.000619272	0.000680704	0.000595139	1.14377	0.228276
'MSMEG_0962 '	0.122398	-0.912227	0.000114684	8.81243e-05	0.000102276	6.97787e-05	1.46572	0.912227
'MSMEG_0963 '	0.73144	-0.135822	0.000148546	7.27271e-05	4.65924e-05	3.94211e-05	1.18191	0.135822
'MSMEG_0964 '	0.527581	-0.277711	0.000183522	0.000298662	0.000216433	0.00018695	1.1577	0.277711
'MSMEG_0965 '	5.63542e-08	-7.24907	0.000339592	6.07151e-05	0.000104032	1.51788e-05	6.85379	7.24907
'MSMEG_0966 '	0.969867	-0.0132877	0.0001027	8.52851e-05	1.90089e-05	1.81272e-05	1.04864	0.0132877
'MSMEG_0967 '	9.9801e-07	-6.00087	6.01986e-05	2.5662e-05	5.42373e-05	5.02319e-06	10.7974	6.00087
'MSMEG_0968 '	0.0975112	-1.01095	0.000222818	0.000267649	0.000168497	0.000213595	0.788863	1.01095
'MSMEG_0969 '	NaN	#VALUE!	1.39349e-07	0	1.03309e-07	0	#DIV/0!	#VALUE!
'MSMEG_0973 '	NaN	#VALUE!	0	0	1.03309e-07	0	#DIV/0!	#VALUE!
'MSMEG_0974 '	NaN	#VALUE!	4.18046e-07	0	0	1.092e-07	0	#VALUE!
'MSMEG_0975 '	0.513518	-0.289444	0.000233269	0.000266229	0.000256207	0.00021698	1.18078	0.289444
'MSMEG_0976 '	0.404719	-0.392846	0.000148267	0.000132896	0.000104445	0.000118591	0.88072	0.392846
'MSMEG_0978 '	0.0118452	-1.92646	0.000120676	0.000142069	7.21097e-05	0.000121976	0.591179	1.92646
'MSMEG_0979 '	1.67276e-05	-4.77657	5.00261e-05	5.84219e-05	1.91122e-05	7.13075e-05	0.268025	4.77657
'MSMEG_0980 '	1.17319e-05	-4.93063	0.000204982	0.00023467	0.000524087	0.000228009	2.29853	4.93063
'MSMEG_0981 '	0.389931	-0.409012	3.58126e-05	4.67375e-05	4.34931e-05	3.17772e-05	1.36869	0.409012
'MSMEG_0982 '	0.010401	-1.98292	0.000218777	0.000136827	0.000151658	0.000215888	0.702483	1.98292
'MSMEG_0983 '	0.0645545	-1.19007	3.60913e-05	3.18864e-05	3.50218e-05	1.92192e-05	1.82223	1.19007
'MSMEG_0984 '	0.890269	-0.0504786	0.000289427	0.000266338	0.00031096	0.000292983	1.06136	0.0504786
'MSMEG_0985 '	0.212246	-0.673161	0.000950775	0.000785365	0.000815935	0.00090756	0.899043	0.673161
'MSMEG_0987 '	0.930062	-0.031488	0.000161226	0.000241332	0.000275525	0.000256947	1.0723	0.031488
'MSMEG_0988 '	0.191928	-0.716861	1.03118e-05	2.10756e-05	1.74592e-05	2.68632e-05	0.649932	0.716861
'MSMEG_0990 '	0.740894	-0.130244	2.46647e-05	1.50696e-05	3.82244e-05	3.85476e-05	0.991616	0.130244
'MSMEG_0991 '	0.0412139	-1.38496	0.000108413	6.68303e-05	3.82244e-05	6.04967e-05	0.631842	1.38496
'MSMEG_0992 '	0.90424	-0.0437162	0.000148127	0.000125361	6.16755e-05	6.21347e-05	0.99261	0.0437162
'MSMEG_0994 '	0.000270587	-3.56769	1.60251e-05	5.58011e-05	2.68604e-05	7.16351e-05	0.374961	3.56769
'MSMEG_0995 '	0.00200334	-2.69824	3.00993e-05	4.48811e-05	4.04972e-05	1.17936e-05	3.43383	2.69824
'MSMEG_0997 '	0.662455	-0.178844	5.99199e-06	1.365e-05	1.45666e-05	1.53972e-05	0.946055	0.178844
'MSMEG_0998 '	0.257398	-0.589395	0	8.40839e-06	9.50444e-06	1.68168e-05	0.565176	0.589395
'MSMEG_0999 '	0.00272911	-2.56398	0.00010047	8.94347e-05	4.02905e-05	8.04803e-05	0.500626	2.56398
'MSMEG_1000 '	0.547895	-0.261303	0.000160669	0.000229866	0.000247735	0.000220911	1.12142	0.261303
'MSMEG_1001 '	8.47952e-14	-13.0716	5.18377e-05	5.16515e-05	4.64891e-06	0.000117499	0.0395655	13.0716
'MSMEG_1002 '	0.716234	-0.144945	0.000310747	0.000293311	0.000310134	0.000310564	0.998614	0.144945
'MSMEG_1003 '	0.786924	-0.104067	0.000370249	0.000383838	0.000363958	0.000361124	1.00785	0.104067
'MSMEG_1004 '	0.167979	-0.774744	0.000230343	0.00021021	0.000180894	0.000216434	0.835793	0.774744
'MSMEG_1005 '	0.396394	-0.401873	7.44121e-05	9.05267e-05	8.36804e-05	0.000100901	0.829334	0.401873
'MSMEG_1006 '	0.0632355	-1.19904	0.000174046	0.000179743	0.00018265	0.000240676	0.758904	1.19904
'MSMEG_1007 '	0.0943229	-1.02538	9.16913e-05	0.000164237	0.000129446	8.65955e-05	1.49484	1.02538
'MSMEG_1008 '	0.0010855	-2.96437	6.52151e-05	5.77667e-05	8.2234e-05	3.1668e-05	2.59676	2.96437
'MSMEG_1009 '	0.961693	-0.0169637	0.000561714	0.00051182	0.000538963	0.000505486	1.06623	0.0169637
'MSMEG_1010 '	0.717431	-0.14422	0.000204842	0.000241441	0.000228416	0.000250723	0.911031	0.14422
'MSMEG_1011 '	0.843881	-0.0737188	6.88382e-05	0.000111384	6.43616e-05	6.50831e-05	0.988913	0.0737188
'MSMEG_1012 '	0.993298	-0.00292066	0.000377495	0.000346491	0.000352181	0.000338192	1.04136	0.00292066
'MSMEG_1013 '	0.0037735	-2.42326	0.000116077	0.000101337	5.56836e-05	0.0001092	0.509924	2.42326
'MSMEG_1014 '	0.570675	-0.243611	0.000166382	0.000174829	0.00019732	0.00016926	1.16578	0.243611
'MSMEG_1015 '	0.00471744	-2.32629	0.000234663	0.000203003	0.000313027	0.000181927	1.72062	2.32629
'MSMEG_1016 '	0.70955	-0.149017	9.32242e-05	9.24923e-05	0.000115086	0.00011739	0.980377	0.149017
'MSMEG_1017 '	0.626702	-0.202939	0.000146316	0.000218072	0.00020073	0.000168495	1.19131	0.202939
'MSMEG_1018 '	0.00831643	-2.08006	0.000213482	0.000170133	0.000239677	0.000139121	1.7228	2.08006
'MSMEG_1019 '	0.698076	-0.156097	0.00150148	0.00151023	0.00160677	0.00153939	1.04377	0.156097
'MSMEG_1020 '	0.613335	-0.212302	0.000264205	0.000196123	0.000212197	0.000220256	0.96341	0.212302
'MSMEG_1021 '	0.96966	-0.0133807	0.000116913	8.77967e-05	6.6841e-05	6.83591e-05	0.977792	0.0133807
'MSMEG_1022 '	0.113697	-0.94425	5.60181e-05	4.81571e-05	7.05601e-05	9.33659e-05	0.755738	0.94425
'MSMEG_1023 '	0.784737	-0.105276	0.000161505	0.000208244	0.000172216	0.000155064	1.11062	0.105276
'MSMEG_1024 '	0.864174	-0.0633989	0.000159972	0.000116407	0.000181514	0.000163909	1.10741	0.0633989
'MSMEG_1025 '	0.13388	-0.873285	0.000278976	0.00023063	0.000283687	0.0002006	1.41419	0.873285
'MSMEG_1026 '	0.726434	-0.138804	0.000208605	0.000233578	0.00019794	0.000190991	1.03639	0.138804
'MSMEG_1027 '	0.405105	-0.392432	0.000189375	0.000199617	0.000246082	0.000206934	1.18918	0.392432
'MSMEG_1028 '	0.871103	-0.0599303	0.000526041	0.000585093	0.000522434	0.000503302	1.03801	0.0599303
'MSMEG_1029 '	0.828824	-0.0815374	0.000305034	0.000337318	0.000247838	0.00024843	0.99762	0.0815374
'MSMEG_1030 '	0.85898	-0.0660171	0.000676258	0.000470761	0.000551774	0.000549384	1.00435	0.0660171
'MSMEG_1031 '	0.776237	-0.110006	0.000136283	0.000139557	0.000132959	0.000126781	1.04873	0.110006
'MSMEG_1032 '	9.15682e-06	-5.03826	7.20432e-05	5.86403e-05	0.000104032	3.03576e-05	3.4269	5.03826
'MSMEG_1033 '	0.34782	-0.458646	0.000487023	0.000477422	0.000495884	0.00050494	0.982064	0.458646
'MSMEG_1034 '	0.0807724	-1.09274	0.00019885	0.000248866	0.000220772	0.000283155	0.779684	1.09274
'MSMEG_1035 '	0.179887	-0.745001	0.000202055	0.000253344	0.000281724	0.000207917	1.35499	0.745001
'MSMEG_1036 '	0.530551	-0.275273	0.000145062	0.000194267	0.000174902	0.00015015	1.16485	0.275273
'MSMEG_1037 '	0.914296	-0.0389131	0.000479777	0.000421621	0.000391025	0.000364509	1.07274	0.0389131
'MSMEG_1038 '	0.748832	-0.125615	8.54206e-05	6.22439e-05	5.82663e-05	5.63471e-05	1.03406	0.125615
'MSMEG_1039 '	0.0259995	-1.58503	8.41665e-05	0.000141741	8.29572e-05	0.000128856	0.643799	1.58503
'MSMEG_1040 '	0.300762	-0.521777	0.000817558	0.000830028	0.000974825	0.000799671	1.21903	0.521777
'MSMEG_1041 '	0.246057	-0.608963	0.000203728	0.000228883	0.00022511	0.00018149	1.24035	0.608963
'MSMEG_1042 '	0.943778	-0.0251304	3.41404e-05	2.5116e-05	4.20468e-05	4.19327e-05	1.00272	0.0251304
'MSMEG_1043 '	0.819901	-0.0862384	0.000194531	0.000220802	0.000162712	0.000151242	1.07584	0.0862384
'MSMEG_1044 '	0.00250653	-2.60093	6.31249e-05	5.50367e-05	1.75625e-05	4.58639e-05	0.382927	2.60093
'MSMEG_1045 '	0.237507	-0.624323	0.000211113	0.000185531	0.000266228	0.000209991	1.2678	0.624323
'MSMEG_1046 '	0.000294649	-3.53069	0.000135029	0.000155282	9.26682e-05	0.000189353	0.489395	3.53069
'MSMEG_1047 '	0.137347	-0.862181	0.000134471	0.000145127	7.087e-05	9.24923e-05	0.766226	0.862181
'MSMEG_1048 '	0.838348	-0.0765756	6.17314e-05	5.15423e-05	6.92171e-05	6.35543e-05	1.0891	0.0765756
'MSMEG_1049 '	0.0970607	-1.01296	0.000129315	0.000157794	0.000134302	0.000179088	0.749922	1.01296
'MSMEG_1050 '	0.865197	-0.0628852	9.62898e-05	0.000104613	0.00013988	0.00013235	1.0569	0.0628852
'MSMEG_1051 '	0.357755	-0.446414	0.000363839	0.000412666	0.000374185	0.000399671	0.936233	0.446414
'MSMEG_1052 '	0.166037	-0.779795	0.00111423	0.00096074	0.00107462	0.000829373	1.2957	0.779795
'MSMEG_1053 '	0.921274	-0.035611	0.000459989	0.000549494	0.000515202	0.00049129	1.04867	0.035611
'MSMEG_1054 '	0.0177623	-1.7505	0	3.822e-06	0	6.33359e-06	0	1.7505
'MSMEG_1055 '	0.289955	-0.537669	0.000127643	0.000175921	0.000172733	0.000141305	1.22241	0.537669
'MSMEG_1056 '	0.714986	-0.145702	0.000220589	0.000181163	0.000143186	0.00014469	0.989609	0.145702
'MSMEG_1057 '	0.918771	-0.0367929	8.13795e-05	6.68303e-05	7.46925e-05	7.03247e-05	1.06211	0.0367929
'MSMEG_1058 '	0.726629	-0.138687	0.000277722	0.000270379	0.000274492	0.000289489	0.948196	0.138687
'MSMEG_1059 '	0.961984	-0.0168324	0.000360077	0.000372699	0.000363855	0.00035479	1.02555	0.0168324
'MSMEG_1060 '	0.767231	-0.115074	9.28061e-05	0.000166857	0.000108991	9.71879e-05	1.12145	0.115074
'MSMEG_1061 '	0.000734322	-3.13411	0.000190629	0.000227245	0.000163228	0.00029211	0.558791	3.13411
'MSMEG_1062 '	NaN	#VALUE!	0	0	0	1.092e-07	0	#VALUE!
'MSMEG_1063 '	NaN	#VALUE!	0	0	1.03309e-07	1.092e-07	0.946055	#VALUE!
'MSMEG_1064 '	0.0955295	-1.01986	9.22487e-05	0.00014469	9.33914e-05	5.70023e-05	1.63838	1.01986
'MSMEG_1065 '	0.831616	-0.0800774	5.2395e-05	8.80151e-05	9.74205e-05	9.41303e-05	1.03495	0.0800774
'MSMEG_1066 '	0.763498	-0.117192	1.35168e-05	2.09664e-05	3.01663e-05	2.59896e-05	1.16071	0.117192
'MSMEG_1067 '	0.00660733	-2.17997	5.04442e-05	0.000104613	4.34931e-05	7.93883e-05	0.547853	2.17997
'MSMEG_1068 '	0.368335	-0.433757	0.000127086	0.000206497	0.000135645	0.000156156	0.868651	0.433757
'MSMEG_1069 '	0.575591	-0.239886	0.000246786	0.000302702	0.000427906	0.000372808	1.14779	0.239886
'MSMEG_1070 '	0.120159	-0.920244	7.49695e-05	5.96231e-05	6.5188e-05	4.57547e-05	1.42473	0.920244
'MSMEG_1071 '	0.0487991	-1.31159	0.000106044	0.000119465	0.000176659	0.000111821	1.57984	1.31159
'MSMEG_1072 '	0.137979	-0.860186	0.000195924	0.000153863	0.000150625	0.000189789	0.793641	0.860186
'MSMEG_1073 '	0.19834	-0.70259	9.68472e-05	5.87495e-05	8.48168e-05	6.07151e-05	1.39696	0.70259
'MSMEG_1074 '	0.0017273	-2.76263	0.000145759	0.000209336	0.000150521	0.000307944	0.488795	2.76263
'MSMEG_1075 '	0.984107	-0.00695776	3.20502e-06	2.2932e-06	2.2728e-06	3.93119e-06	0.578145	0.00695776
'MSMEG_1076 '	0.77288	-0.111888	2.78697e-05	3.19956e-05	2.77901e-05	3.02484e-05	0.918732	0.111888
'MSMEG_1077 '	0.00112812	-2.94765	5.16983e-05	5.78759e-05	2.68604e-05	6.51923e-05	0.412017	2.94765
'MSMEG_1078 '	0.0183747	-1.73578	0.000119561	5.59103e-05	0.000114776	6.35543e-05	1.80596	1.73578
'MSMEG_1080 '	0.946866	-0.0237115	0.000417906	0.00042173	0.000442679	0.000415833	1.06456	0.0237115
'MSMEG_1082 '	0.116091	-0.935202	0.000234524	0.000177122	0.000150005	0.000194594	0.77086	0.935202
'MSMEG_1084 '	0.706126	-0.151118	0.000234384	0.000204641	0.0001842	0.000180289	1.02169	0.151118
'MSMEG_1085 '	0.626447	-0.203116	0.000214736	0.000151679	0.000135335	0.000148512	0.911274	0.203116
'MSMEG_1086 '	0.917712	-0.0372934	0.00010702	7.45835e-05	0.0001717	0.000168714	1.0177	0.0372934
'MSMEG_1087 '	1.23395e-05	-4.9087	5.57394e-05	8.62679e-05	1.16739e-05	6.39911e-05	0.18243	4.9087
'MSMEG_1088 '	0.660119	-0.180378	0.000107159	8.69231e-05	7.15932e-05	6.19163e-05	1.15629	0.180378
'MSMEG_1089 '	0.104697	-0.980067	5.71329e-06	0	3.92575e-06	1.01556e-05	0.38656	0.980067
'MSMEG_1090 '	0.252743	-0.597321	0.000109667	0.000148293	0.000145149	0.000178869	0.811482	0.597321
'MSMEG_1091 '	3.02809e-05	-4.51883	1.88121e-05	5.65655e-05	0	2.33688e-05	0	4.51883
'MSMEG_1092 '	0.00135818	-2.86704	0	0	1.45666e-05	0	#DIV/0!	2.86704
'MSMEG_1093 '	0.00386961	-2.41233	2.46647e-05	1.49604e-05	0	1.092e-05	0	2.41233
'MSMEG_1094 '	0.0300102	-1.52273	0.000191186	0.000163254	0.000111057	0.000164564	0.674857	1.52273
'MSMEG_1095 '	0.649124	-0.187672	5.10016e-05	7.25087e-05	5.74399e-05	4.81571e-05	1.19276	0.187672
'MSMEG_1096 '	0.704771	-0.151952	0.000207629	0.000200382	0.000161989	0.000164673	0.983697	0.151952
'MSMEG_1097 '	2.9061e-07	-6.53669	8.51419e-05	8.88887e-05	0.000103619	2.15124e-05	4.81672	6.53669
'MSMEG_1098 '	0.93833	-0.0276442	0.00059474	0.000489761	0.000474189	0.000463444	1.02318	0.0276442
'MSMEG_1099 '	0.650625	-0.18667	1.37955e-05	9.06359e-06	2.15916e-05	1.68168e-05	1.28393	0.18667
'MSMEG_1100 '	0.000341023	-3.46722	2.34106e-05	4.23695e-05	0	1.60524e-05	0	3.46722
'MSMEG_1101 '	5.20702e-08	-7.28341	9.41996e-05	0.000157685	0.000244223	7.48019e-05	3.26493	7.28341
'MSMEG_1102 '	0.0695055	-1.15798	0.000251524	0.000284684	0.000282344	0.000374119	0.75469	1.15798
'MSMEG_1104 '	NaN	#VALUE!	0	0	0	3.3852e-06	0	#VALUE!
'MSMEG_1105 '	0.696983	-0.156778	5.16983e-05	7.44743e-05	5.51671e-05	4.70651e-05	1.17214	0.156778
'MSMEG_1106 '	0.0414397	-1.38258	0.000102003	9.47855e-05	6.52913e-05	3.53808e-05	1.84539	1.38258
'MSMEG_1107 '	0.589964	-0.229175	4.36161e-05	5.38355e-05	2.98563e-05	3.63636e-05	0.821051	0.229175
'MSMEG_1108 '	0.00403041	-2.39465	4.62637e-05	0.000101883	0.000142567	7.60031e-05	1.8758	2.39465
'MSMEG_1109 '	NaN	#VALUE!	0	0	1.03309e-07	0	#DIV/0!	#VALUE!
'MSMEG_1110 '	0.0219718	-1.65813	0	4.04039e-06	5.99193e-06	0	#DIV/0!	1.65813
'MSMEG_1111 '	0.000687999	-3.16241	0.000171399	0.000122959	0.000248045	0.000122741	2.02089	3.16241
'MSMEG_1112 '	0.585168	-0.232719	0.00013684	0.000140649	0.000132132	0.000152006	0.869256	0.232719
'MSMEG_1113 '	0.972476	-0.0121212	2.74517e-05	3.276e-05	2.29346e-05	2.09664e-05	1.09388	0.0121212
'MSMEG_1114 '	0.421285	-0.375424	0.000205957	0.000231067	0.000291332	0.000227136	1.28263	0.375424
'MSMEG_1115 '	0.257398	-0.589395	6.96743e-07	3.7128e-06	1.58063e-05	9.50039e-06	1.66375	0.589395
'MSMEG_1116 '	0.654063	-0.184381	0.000317157	0.000195468	0.000265504	0.000271689	0.977235	0.184381
'MSMEG_1117 '	0.00772856	-2.1119	2.04842e-05	1.93284e-05	5.06215e-06	2.26044e-05	0.223945	2.1119
'MSMEG_1118 '	0.835048	-0.0782888	0.000331789	0.000272017	0.000264161	0.000267103	0.988987	0.0782888
'MSMEG_1119 '	0.3743	-0.42678	0.000177948	0.000187824	0.000206205	0.000156811	1.31499	0.42678
'MSMEG_1120 '	0.291157	-0.535873	0.00019244	0.000194703	0.00018575	0.000219055	0.84796	0.535873
'MSMEG_1122 '	0.341042	-0.467192	0	0	2.06618e-06	7.42559e-06	0.278251	0.467192
'MSMEG_1123 '	0.676515	-0.169722	9.87981e-05	0.000110292	8.85359e-05	0.000102211	0.866206	0.169722
'MSMEG_1124 '	0.254817	-0.593772	0.000116495	6.51923e-05	0.000138537	0.000102539	1.35108	0.593772
'MSMEG_1125 '	0.569129	-0.244789	2.25745e-05	4.42259e-05	3.78111e-05	4.02947e-05	0.938364	0.244789
'MSMEG_1126 '	0.000444922	-3.35172	4.30587e-05	4.35707e-05	0.000119942	4.89215e-05	2.45172	3.35172
'MSMEG_1127 '	0.00273274	-2.5634	7.81745e-05	3.75648e-05	3.30589e-05	7.02155e-05	0.470821	2.5634
'MSMEG_1129 '	0.203745	-0.690912	0.00013907	0.000128747	0.000208581	0.000159432	1.30828	0.690912
'MSMEG_1130 '	0.562777	-0.249664	0.000173628	0.000142397	0.000134612	0.000147311	0.913795	0.249664
'MSMEG_1131 '	0.96537	-0.0153061	6.49364e-05	0.000141741	0.000118496	0.000117062	1.01224	0.0153061
'MSMEG_1132 '	0.000518988	-3.28484	2.91238e-05	5.60195e-05	7.28329e-05	2.47884e-05	2.93819	3.28484
'MSMEG_1134 '	0.0297716	-1.5262	0.000167218	0.000135299	0.000141327	0.000210101	0.672663	1.5262
'MSMEG_1135 '	0.090315	-1.04424	9.87981e-05	9.07451e-05	0.000104962	0.000142287	0.737676	1.04424
'MSMEG_1136 '	0.187691	-0.726557	4.04111e-05	4.32431e-05	3.88442e-05	5.43815e-05	0.714291	0.726557
'MSMEG_1137 '	0.635286	-0.197031	0.000579411	0.000493037	0.000503322	0.000453179	1.11065	0.197031
'MSMEG_1138 '	0.104406	-0.981273	0.000137816	0.000104941	0.000124797	0.000154518	0.807657	0.981273
'MSMEG_1139 '	0.0244391	-1.61191	0.000103118	9.82799e-05	0.000113123	6.41003e-05	1.76479	1.61191
'MSMEG_1140 '	0.0324652	-1.48858	8.29124e-05	0.000100573	5.58902e-05	9.43487e-05	0.592379	1.48858
'MSMEG_1141 '	3.78249e-09	-8.42222	0.000144922	0.000109746	4.01872e-05	0.000174065	0.230875	8.42222
'MSMEG_1142 '	0.973276	-0.011764	0.000152169	0.000106797	0.000139571	0.000144362	0.966808	0.011764
'MSMEG_1143 '	0.0496714	-1.30389	5.92231e-05	7.55663e-05	8.84326e-05	5.21975e-05	1.69419	1.30389
'MSMEG_1144 '	0.680583	-0.167119	0.000139488	0.000157575	0.000139674	0.000140213	0.996158	0.167119
'MSMEG_1145 '	0.00321068	-2.4934	4.83539e-05	9.36935e-05	3.85343e-05	8.67047e-05	0.444431	2.4934
'MSMEG_1146 '	8.48606e-08	-7.07129	2.53614e-05	4.60823e-05	1.03309e-07	3.84384e-05	0.00268766	7.07129
'MSMEG_1147 '	0.34498	-0.462206	2.78697e-06	2.66448e-05	2.44843e-05	1.70352e-05	1.43728	0.462206
'MSMEG_1148 '	0.215028	-0.667505	0.000127643	6.94511e-05	0.00010052	7.28363e-05	1.38008	0.667505
'MSMEG_1149 '	3.3125e-05	-4.47984	2.41073e-05	3.74556e-05	0	2.17308e-05	0	4.47984
'MSMEG_1150 '	0.00328833	-2.48302	0.000137537	0.000147311	0.000120355	0.000212503	0.566369	2.48302
'MSMEG_1151 '	0.00277455	-2.55681	0.000114126	0.000100901	7.55189e-05	0.000141414	0.534028	2.55681
'MSMEG_1152 '	0.0163047	-1.78769	0.000298345	0.00020202	0.000344329	0.000209773	1.64144	1.78769
'MSMEG_1153 '	0.0119245	-1.92356	0.000182407	0.000179961	0.000134715	0.000205842	0.654459	1.92356
'MSMEG_1154 '	3.1938e-07	-6.49569	8.62567e-05	9.40211e-05	2.75835e-05	0.000101993	0.270446	6.49569
'MSMEG_1155 '	8.98331e-06	-5.04656	0	2.27136e-05	4.53527e-05	5.35079e-06	8.47588	5.04656
'MSMEG_1156 '	0.03831	-1.41669	7.97074e-05	7.82963e-05	7.33494e-05	4.04039e-05	1.8154	1.41669
'MSMEG_1157 '	0.0020928	-2.67927	6.27068e-05	4.54271e-05	4.29766e-05	9.17279e-05	0.468523	2.67927
'MSMEG_1158 '	0.00200438	-2.69802	8.69535e-05	0.000157466	0.000132649	0.000223423	0.593712	2.69802
'MSMEG_1159 '	0.00876141	-2.05743	2.03449e-05	4.25879e-05	8.34737e-05	4.14959e-05	2.01161	2.05743
'MSMEG_1160 '	0.0681871	-1.1663	3.34436e-05	5.65655e-05	1.96287e-05	3.64728e-05	0.538175	1.1663
'MSMEG_1161 '	0.576991	-0.238831	4.79359e-05	7.85147e-05	6.1159e-05	6.30083e-05	0.970649	0.238831
'MSMEG_1162 '	0.3173	-0.49853	5.10016e-05	4.55363e-05	1.9732e-05	2.80644e-05	0.703099	0.49853
'MSMEG_1163 '	0.174229	-0.75888	4.5985e-05	6.60659e-05	3.73979e-05	4.83755e-05	0.773074	0.75888
'MSMEG_1164 '	0.304592	-0.516281	4.26406e-05	2.457e-05	3.71913e-05	2.71908e-05	1.36779	0.516281
'MSMEG_1165 '	0.736288	-0.132952	3.09354e-05	7.05431e-05	5.58902e-05	6.23531e-05	0.89635	0.132952
'MSMEG_1167 '	0.706095	-0.151137	0.000463613	0.000534752	0.000505905	0.000475893	1.06306	0.151137
'MSMEG_1168 '	0.00431962	-2.36455	7.85926e-05	5.02319e-05	6.85972e-05	0.000129183	0.531006	2.36455
'MSMEG_1169 '	0.794511	-0.0998998	0.000171677	0.000194594	0.000153621	0.000160196	0.958953	0.0998998
'MSMEG_1171 '	0.00986283	-2.006	5.10016e-05	0.000103958	3.49185e-05	6.43187e-05	0.542897	2.006
'MSMEG_1172 '	0.272256	-0.565022	0.000133357	9.00899e-05	0.000113123	0.000133224	0.849123	0.565022
'MSMEG_1173 '	0.177171	-0.751606	8.79289e-05	3.26508e-05	6.59112e-05	4.64099e-05	1.4202	0.751606
'MSMEG_1174 '	0.392787	-0.405843	4.8772e-05	2.53344e-05	2.68604e-05	3.45072e-05	0.7784	0.405843
'MSMEG_1175 '	0.152568	-0.816537	7.00923e-05	6.34451e-05	6.26053e-05	4.16051e-05	1.50475	0.816537
'MSMEG_1176 '	0.000460447	-3.33682	0.000163316	0.000122195	0.000107132	0.000201365	0.532028	3.33682
'MSMEG_1177 '	0.444008	-0.35261	0.000140185	0.000185203	0.000211887	0.000176467	1.20072	0.35261
'MSMEG_1178 '	0.953157	-0.0208355	1.21233e-05	2.5662e-05	1.53931e-05	1.4742e-05	1.04416	0.0208355
'MSMEG_1179 '	0.94596	-0.0241274	0.000210556	0.000278132	0.000226763	0.000211302	1.07317	0.0241274
'MSMEG_1180 '	0.849027	-0.0710783	8.36091e-06	2.53344e-05	2.69637e-05	2.77368e-05	0.972127	0.0710783
'MSMEG_1181 '	0.123372	-0.908784	0.000121094	7.50203e-05	0.000103929	7.34915e-05	1.41416	0.908784
'MSMEG_1182 '	0.00143108	-2.84434	2.46647e-05	2.184e-06	3.51251e-06	2.15124e-05	0.163279	2.84434
'MSMEG_1183 '	0.00955986	-2.01955	4.15259e-05	5.32895e-05	1.03309e-05	2.8938e-05	0.357002	2.01955
'MSMEG_1184 '	0.095387	-1.02051	0.000206515	0.000126453	0.000149592	9.83891e-05	1.52041	1.02051
'MSMEG_1185 '	0.802688	-0.0954533	0.000214179	0.000301282	0.000298047	0.000299644	0.994668	0.0954533
'MSMEG_1186 '	0.137286	-0.862375	0.000473785	0.000622876	0.000438857	0.000558448	0.785851	0.862375
'MSMEG_1187 '	0.504138	-0.297451	0.000600313	0.000597651	0.000566547	0.000608462	0.931114	0.297451
'MSMEG_1188 '	0.87573	-0.0576297	0.000585403	0.000660878	0.000611693	0.000631066	0.969301	0.0576297
'MSMEG_1189 '	0.0675079	-1.17065	0.000197178	0.000171662	0.000165501	0.000223641	0.740029	1.17065
'MSMEG_1190 '	0.764796	-0.116454	0.000379028	0.000288288	0.000326043	0.000319519	1.02042	0.116454
'MSMEG_1191 '	0.027571	-1.55955	2.17384e-05	0	1.45666e-05	3.6036e-06	4.04224	1.55955
'MSMEG_1192 '	0.201445	-0.695843	0.000263926	0.000324433	0.00025476	0.000318536	0.799785	0.695843
'MSMEG_1193 '	0.888753	-0.0512187	0.000362864	0.000312421	0.000263541	0.00025793	1.02176	0.0512187
'MSMEG_1194 '	0.665914	-0.176582	3.85995e-05	4.60823e-05	7.2213e-05	6.30083e-05	1.14609	0.176582
'MSMEG_1195 '	0.793795	-0.100292	0.000449956	0.000426316	0.000357966	0.00036855	0.971283	0.100292
'MSMEG_1196 '	0.753484	-0.122926	0.000100749	6.77039e-05	7.74818e-05	7.10891e-05	1.08993	0.122926
'MSMEG_1197 '	0.222275	-0.653109	1.75579e-05	5.24159e-05	8.2544e-05	6.02783e-05	1.36938	0.653109
'MSMEG_1198 '	0.686226	-0.163533	5.01655e-05	7.93883e-05	2.53107e-05	2.31504e-05	1.09332	0.163533
'MSMEG_1199 '	0.0310712	-1.50764	0.000112176	8.97623e-05	9.87635e-05	5.48183e-05	1.80165	1.50764
'MSMEG_1200 '	0.121702	-0.914702	0.000400627	0.000454817	0.000661281	0.000494129	1.33828	0.914702
'MSMEG_1201 '	0.000918618	-3.03686	1.22627e-05	2.63172e-05	1.37401e-05	0	#DIV/0!	3.03686
'MSMEG_1202 '	0.0963888	-1.01597	4.01324e-05	5.06687e-05	4.69023e-05	6.73763e-05	0.696125	1.01597
'MSMEG_1203 '	0.372991	-0.428302	0.00014757	0.000164346	0.000119839	0.000138247	0.866844	0.428302
'MSMEG_1204 '	0.513105	-0.289794	0.000424038	0.000279224	0.000328936	0.000274201	1.19962	0.289794
'MSMEG_1205 '	0.00298791	-2.52463	0.000172374	0.000122195	0.000111471	0.000191755	0.581317	2.52463
'MSMEG_1207 '	0.688923	-0.161829	0.000178645	0.000100901	0.00014236	0.000145563	0.977992	0.161829
'MSMEG_1208 '	0.139343	-0.855914	9.04372e-05	8.16815e-05	6.66344e-05	8.76875e-05	0.759907	0.855914
'MSMEG_1209 '	0.000513725	-3.28927	0.000335273	0.000329565	0.000255483	0.000451214	0.566214	3.28927
'MSMEG_1210 '	0.144433	-0.840332	0.000235778	0.000199181	0.00034247	0.000265356	1.29061	0.840332
'MSMEG_1211 '	0.00968722	-2.0138	0.00024386	0.000310346	0.000358586	0.000213377	1.68053	2.0138
'MSMEG_1212 '	2.00182e-07	-6.69857	3.0378e-05	2.50068e-05	2.11784e-05	8.68139e-05	0.243951	6.69857
'MSMEG_1213 '	0.190424	-0.720278	0.000112872	8.63771e-05	0.000104549	0.000129948	0.804544	0.720278
'MSMEG_1214 '	0.07681	-1.11458	0.000148127	6.72671e-05	0.000118289	7.17443e-05	1.64876	1.11458
'MSMEG_1215 '	1.4552e-05	-4.83708	5.57394e-05	7.82963e-05	1.59096e-05	6.28991e-05	0.252938	4.83708
'MSMEG_1216 '	0.649254	-0.187585	0.000520188	0.000382418	0.000469643	0.000484083	0.970171	0.187585
'MSMEG_1217 '	8.98962e-05	-4.04626	0.000180038	0.000126563	0.000304658	0.000142178	2.14279	4.04626
'MSMEG_1218 '	6.8499e-05	-4.16432	1.61644e-05	3.18864e-05	0	1.8564e-05	0	4.16432
'MSMEG_1219 '	0.820576	-0.0858811	0.00037861	0.000314605	0.000286166	0.000269833	1.06053	0.0858811
'MSMEG_1220 '	0.802168	-0.0957346	0.000419996	0.000375538	0.000391955	0.000362216	1.0821	0.0957346
'MSMEG_1221 '	0.0215453	-1.66665	0.000353806	0.000413758	0.000363131	0.000521211	0.696707	1.66665
'MSMEG_1222 '	0.27882	-0.554676	0.000467375	0.000525033	0.000475842	0.000403057	1.18058	0.554676
'MSMEG_1223 '	0.0268451	-1.57114	0.000197039	0.00026481	0.000194014	0.000275839	0.703362	1.57114
'MSMEG_1225 '	0.293574	-0.532283	0.000130012	7.61123e-05	9.70072e-05	7.10891e-05	1.36459	0.532283
'MSMEG_1226 '	0.182979	-0.737599	0.000152865	0.000133661	0.000104755	0.000134097	0.781189	0.737599
'MSMEG_1228 '	0.40451	-0.393071	0.000174464	0.000264919	0.000232239	0.000260878	0.890218	0.393071
'MSMEG_1229 '	0.00478826	-2.31982	0.000192301	0.000288178	0.000430902	0.000267212	1.61259	2.31982
'MSMEG_1230 '	0.000918618	-3.03686	1.81153e-05	1.12476e-05	0	1.2558e-05	0	3.03686
'MSMEG_1231 '	NaN	#VALUE!	5.99199e-06	6.66119e-06	3.09927e-07	0	#DIV/0!	#VALUE!
'MSMEG_1232 '	0.428563	-0.367986	0.000157324	0.000135954	0.000217466	0.000182036	1.19463	0.367986
'MSMEG_1233 '	0.914915	-0.0386194	0.000109528	9.56591e-05	7.7895e-05	7.19627e-05	1.08244	0.0386194
'MSMEG_1234 '	0.000780497	-3.10763	3.17715e-05	1.61616e-05	2.4071e-05	4.36799e-06	5.51077	3.10763
'MSMEG_1235 '	0.0159951	-1.79601	0.000190071	0.000311766	0.000365817	0.000219819	1.66417	1.79601
'MSMEG_1236 '	5.45309e-05	-4.26336	4.96081e-05	3.85476e-05	0.000101346	2.81736e-05	3.59721	4.26336
'MSMEG_1237 '	0.0709748	-1.1489	6.54938e-06	5.24159e-06	1.25004e-05	2.65356e-05	0.471081	1.1489
'MSMEG_1238 '	0.226554	-0.644829	0.000363421	0.000310783	0.000358689	0.000426862	0.840292	0.644829
'MSMEG_1239 '	0.406892	-0.390521	0.000426546	0.000380234	0.000336581	0.000372372	0.903885	0.390521
'MSMEG_1240 '	0.0927394	-1.03274	0.00023313	0.000205842	0.000203519	0.000271471	0.74969	1.03274
'MSMEG_1241 '	0.896339	-0.0475277	0.000135865	0.000167185	0.000219119	0.000211411	1.03646	0.0475277
'MSMEG_1242 '	0.82421	-0.0839622	0.000340707	0.000406879	0.000410034	0.000407861	1.00533	0.0839622
'MSMEG_1243 '	0.0170306	-1.76877	0.000638495	0.000611301	0.000489995	0.000695494	0.704528	1.76877
'MSMEG_1244 '	0.459979	-0.337262	0.00181808	0.00189822	0.00197579	0.002076	0.951728	0.337262
'MSMEG_1245 '	0.202273	-0.694063	0.000536631	0.000550149	0.000397843	0.000480589	0.827825	0.694063
'MSMEG_1246 '	0.112357	-0.949398	0.00108957	0.00126595	0.00137721	0.00103347	1.33261	0.949398
'MSMEG_1247 '	0.166794	-0.77782	0.000206096	0.000275074	0.000164365	0.00020606	0.797654	0.77782
'MSMEG_1248 '	0.0164909	-1.78275	0.000478105	0.00050636	0.000426563	0.000593283	0.718988	1.78275
'MSMEG_1249 '	0.362022	-0.441264	9.08552e-05	0.00011324	0.000159716	0.000132132	1.20876	0.441264
'MSMEG_1250 '	0.000630694	-3.20018	0.000109946	0.000125143	4.30799e-05	9.98087e-05	0.431625	3.20018
'MSMEG_1251 '	0.00762428	-2.1178	0.000693816	0.000577776	0.000386479	0.000588041	0.657232	2.1178
'MSMEG_1252 '	0.0672154	-1.17253	0.000735342	0.000805895	0.000885565	0.000656073	1.3498	1.17253
'MSMEG_1253 '	0.687392	-0.162796	0.00141481	0.00142495	0.00143548	0.00148108	0.969213	0.162796
'MSMEG_1254 '	0.705573	-0.151458	0.00249476	0.00272192	0.00296528	0.00253999	1.16744	0.151458
'MSMEG_1255 '	0.17463	-0.757882	0.000936422	0.000940102	0.000749094	0.000874145	0.856945	0.757882
'MSMEG_1256 '	0.0742202	-1.12948	0.00012402	0.000105269	0.000105479	0.000145236	0.726257	1.12948
'MSMEG_1257 '	0.709639	-0.148962	0.000317575	0.00031395	0.000313543	0.000314932	0.995588	0.148962
'MSMEG_1258 '	1	0	0.000289288	0.000320938	0.000298667	0.000287523	1.03876	0
'MSMEG_1259 '	0.74209	-0.129544	0.000164013	0.000135299	0.000136678	0.000149167	0.916274	0.129544
'MSMEG_1260 '	0.413177	-0.383864	0.000436858	0.00054185	0.000395467	0.000475019	0.832528	0.383864
'MSMEG_1261 '	0.000105718	-3.97585	0.000195785	0.00030565	0.000175522	0.000324651	0.540648	3.97585
'MSMEG_1262 '	0.326178	-0.486546	1.43529e-05	1.98744e-05	1.45666e-05	1.8564e-05	0.784669	0.486546
'MSMEG_1263 '	0.1494	-0.825651	0.000243721	0.000215342	0.000215503	0.000273327	0.788442	0.825651
'MSMEG_1264 '	0.000149888	-3.82423	0.000209162	0.000236636	0.000104549	0.000210319	0.497096	3.82423
'MSMEG_1265 '	0.0751932	-1.12382	0.000348093	0.000284247	0.000334205	0.000235435	1.41952	1.12382
'MSMEG_1266 '	0.848844	-0.0711722	6.81414e-05	0.000120884	7.40726e-05	6.89051e-05	1.07499	0.0711722
'MSMEG_1267 '	0.975525	-0.0107617	0.000190907	0.000197324	0.000138537	0.000132132	1.04848	0.0107617
'MSMEG_1268 '	0.0142962	-1.84478	2.10416e-05	1.6926e-05	1.30169e-05	3.26508e-05	0.398672	1.84478
'MSMEG_1269 '	0.37782	-0.422715	0.000556558	0.000374556	0.000486792	0.000403603	1.20612	0.422715
'MSMEG_1270 '	0.805892	-0.0937233	0.000114405	0.000105269	0.000139571	0.000129183	1.08041	0.0937233
'MSMEG_1271 '	0.283633	-0.547243	8.76502e-05	0.000119137	8.39903e-05	9.52223e-05	0.882044	0.547243
'MSMEG_1272 '	0.000363363	-3.43966	5.1559e-05	8.51759e-05	8.06844e-05	0.000156374	0.51597	3.43966
'MSMEG_1273 '	0.0126878	-1.89661	0.000147152	0.000122631	9.40113e-05	0.000157248	0.597854	1.89661
'MSMEG_1274 '	0.0561629	-1.25055	0.000294165	0.00025651	0.000266641	0.00036309	0.734366	1.25055
'MSMEG_1275 '	0.954522	-0.0202138	8.31911e-05	5.62379e-05	8.23373e-05	7.96067e-05	1.0343	0.0202138
'MSMEG_1276 '	1.40022e-09	-8.8538	7.3576e-05	4.19327e-05	2.5414e-05	0.000143052	0.177656	8.8538
'MSMEG_1278 '	0.953409	-0.0207207	0.000206654	0.00017472	0.000146079	0.000155391	0.940072	0.0207207
'MSMEG_1279 '	0.0584423	-1.23327	0.000449538	0.000485503	0.000448051	0.000595576	0.752299	1.23327
'MSMEG_1280 '	0.517388	-0.286184	0.000270754	0.000306415	0.000319948	0.000269178	1.18861	0.286184
'MSMEG_1281 '	0.978662	-0.00936747	0.000619544	0.000632158	0.000749921	0.000712857	1.05199	0.00936747
'MSMEG_1282 '	0.243694	-0.613154	0.000163038	0.000215561	0.000121905	0.00016238	0.750736	0.613154
'MSMEG_1283 '	0.304994	-0.515709	0.000204842	0.000171116	0.00016922	0.000135845	1.24569	0.515709
'MSMEG_1284 '	0.622879	-0.205596	8.68141e-05	0.000119465	0.000132029	0.000143707	0.918737	0.205596
'MSMEG_1285 '	0.314905	-0.501821	0.000273123	0.000194485	0.000249801	0.000296368	0.842874	0.501821
'MSMEG_1286 '	0.118337	-0.926879	0.000264623	0.000209227	0.000179758	0.000227463	0.790272	0.926879
'MSMEG_1287 '	4.35086e-06	-5.36142	5.71329e-05	0.000127655	3.05795e-05	9.55499e-05	0.320037	5.36142
'MSMEG_1288 '	8.69977e-07	-6.06049	0.000115241	0.000102429	0.000150625	4.65191e-05	3.23791	6.06049
'MSMEG_1289 '	0.474318	-0.323931	0.000292911	0.000255964	0.000259512	0.000213377	1.21622	0.323931
'MSMEG_1290 '	0.485404	-0.313897	0.000279254	0.000264919	0.000257136	0.000271798	0.946055	0.313897
'MSMEG_1291 '	0.16242	-0.789359	0.000274517	0.000279442	0.000324907	0.000242533	1.33964	0.789359
'MSMEG_1292 '	0.318826	-0.496447	2.61975e-05	7.90607e-05	2.96497e-05	3.78924e-05	0.782472	0.496447
'MSMEG_1293 '	0.4015	-0.396314	0.000108692	0.000152115	0.00011178	0.000129293	0.864554	0.396314
'MSMEG_1294 '	0.0330439	-1.48091	6.10347e-05	5.75483e-05	2.76868e-05	4.94675e-05	0.559697	1.48091
'MSMEG_1295 '	4.7702e-07	-6.32146	4.97474e-05	4.93583e-05	7.29362e-05	1.32132e-05	5.51996	6.32146
'MSMEG_1296 '	0.54038	-0.267301	1.82547e-05	1.70352e-05	3.38854e-05	3.84384e-05	0.881551	0.267301
'MSMEG_1297 '	0.338092	-0.470965	7.76171e-05	7.61123e-05	9.66973e-05	7.76411e-05	1.24544	0.470965
'MSMEG_1298 '	0.000558915	-3.25265	3.56732e-05	4.85939e-05	5.12413e-05	0.000109527	0.46784	3.25265
'MSMEG_1299 '	0.0423732	-1.37291	0.000207351	0.00024155	0.000183684	0.00011739	1.56473	1.37291
'MSMEG_1300 '	0.0274264	-1.56183	0.000132381	0.000142287	0.000199696	0.0001187	1.68236	1.56183
'MSMEG_1301 '	0.0372317	-1.42909	1.68612e-05	5.28527e-05	7.77917e-05	4.60823e-05	1.6881	1.42909
'MSMEG_1302 '	0.000411299	-3.38584	5.99199e-06	1.49604e-05	1.75625e-05	0	#DIV/0!	3.38584
'MSMEG_1303 '	0.192396	-0.715804	9.35029e-05	0.000158231	0.000112607	0.000142724	0.788982	0.715804
'MSMEG_1304 '	0.56297	-0.249515	0.00010688	7.76411e-05	0.000124901	0.000103194	1.21035	0.249515
'MSMEG_1305 '	0.0691538	-1.16018	0.00011329	0.000105596	0.00011209	0.000159869	0.701141	1.16018
'MSMEG_1306 '	0.143531	-0.843055	0.000164849	0.000156156	0.000102793	0.000133224	0.771578	0.843055
'MSMEG_1307 '	0.0398855	-1.39918	0.000170145	0.000121212	0.00024133	0.000150696	1.60144	1.39918
'MSMEG_1308 '	0.569331	-0.244635	0.000168054	0.000175703	0.000199696	0.000223314	0.894242	0.244635
'MSMEG_1309 '	0.0665693	-1.17673	2.27138e-05	3.1122e-05	7.43825e-06	1.7472e-05	0.425725	1.17673
'MSMEG_1310 '	0.661032	-0.179778	0.000231876	0.000262516	0.000225834	0.000203221	1.11127	0.179778
'MSMEG_1311 '	0.228229	-0.64163	0.000319526	0.000264154	0.000405591	0.000452306	0.89672	0.64163
'MSMEG_1312 '	0.0599074	-1.22252	7.0371e-05	8.49575e-05	0.000100416	0.000142397	0.705188	1.22252
'MSMEG_1313 '	0.367556	-0.434677	0.000283156	0.000285776	0.000270876	0.000304558	0.889407	0.434677
'MSMEG_1314 '	0.467948	-0.329803	0.000173628	0.000246136	0.000222321	0.000248866	0.893335	0.329803
'MSMEG_1315 '	0.0288057	-1.54052	0.000363282	0.000405241	0.00031313	0.000444116	0.705063	1.54052
'MSMEG_1316 '	0.772318	-0.112204	6.77234e-05	0.000134753	0.000106718	9.66419e-05	1.10427	0.112204
'MSMEG_1317 '	0.117108	-0.931413	2.17384e-05	1.94376e-05	9.81436e-06	1.9656e-06	4.99307	0.931413
'MSMEG_1318 '	0.501524	-0.299709	8.34698e-05	0.000109855	6.5498e-05	7.53479e-05	0.869274	0.299709
'MSMEG_1319 '	0.00047698	-3.3215	6.57725e-05	0.000118263	9.25649e-05	3.72372e-05	2.48582	3.3215
'MSMEG_1320 '	0.96978	-0.0133266	0.000208187	0.000203549	0.000258686	0.000245918	1.05192	0.0133266
'MSMEG_1321 '	5.51949e-05	-4.2581	0.000125553	0.000145236	8.89491e-05	0.00019514	0.455822	4.2581
'MSMEG_1322 '	2.88492e-07	-6.53987	0.000971538	0.000799015	0.00107865	0.000462789	2.33076	6.53987
'MSMEG_1323 '	0.0356387	-1.44808	3.72061e-05	8.87795e-05	2.61372e-05	4.81571e-05	0.542748	1.44808
'MSMEG_1324 '	0.177192	-0.751556	0	0	7.85149e-06	1.15752e-05	0.678304	0.751556
'MSMEG_1325 '	0.0287068	-1.54202	8.05434e-05	0.000109746	0.000104755	0.000156374	0.669902	1.54202
'MSMEG_1326 '	NaN	#VALUE!	0	3.7128e-06	0	3.4944e-06	0	#VALUE!
'MSMEG_1327 '	0.689509	-0.16146	0.000286779	0.000381544	0.000228933	0.000204531	1.1193	0.16146
'MSMEG_1328 '	0.409678	-0.387557	0.000394635	0.000296805	0.000382347	0.000399781	0.956392	0.387557
'MSMEG_1329 '	6.61845e-10	-9.17924	0.000109807	6.74855e-05	4.53527e-05	0.000196778	0.230476	9.17924
'MSMEG_1330 '	0.941316	-0.0262645	0.000103815	0.000112803	9.7937e-05	8.97623e-05	1.09107	0.0262645
'MSMEG_1331 '	0.728758	-0.137417	0.000268385	0.00015834	0.000229863	0.000222331	1.03388	0.137417
'MSMEG_1332 '	0.964881	-0.0155262	0.000233269	0.000265356	0.000321601	0.00030019	1.07132	0.0155262
'MSMEG_1333 '	0.157362	-0.8031	0.000457481	0.000356538	0.000487516	0.000384711	1.26723	0.8031
'MSMEG_1334 '	0.0853408	-1.06884	0.000101167	0.000119574	9.86602e-05	0.000138029	0.714781	1.06884
'MSMEG_1335 '	0.000333878	-3.47641	3.81815e-05	4.29155e-05	1.35335e-05	4.50995e-05	0.30008	3.47641
'MSMEG_1336 '	0.00403782	-2.39385	0.00019899	0.000235653	0.000241123	0.000130931	1.84161	2.39385
'MSMEG_1338 '	NaN	#VALUE!	0	0	2.06618e-07	0	#DIV/0!	#VALUE!
'MSMEG_1339 '	0.35766	-0.44653	0	1.5288e-06	7.64487e-06	4.04039e-06	1.89211	0.44653
'MSMEG_1340 '	0.731093	-0.136028	0.0021312	0.00202063	0.00218261	0.00203701	1.07148	0.136028
'MSMEG_1341 '	0.0437303	-1.35922	2.22958e-06	2.28228e-05	2.34512e-05	4.26971e-05	0.549244	1.35922
'MSMEG_1346 '	NaN	#VALUE!	0	1.76904e-05	1.03309e-07	0	#DIV/0!	#VALUE!
'MSMEG_1348 '	0.321646	-0.492622	0.000125692	8.56127e-05	0.000144736	0.000162489	0.890741	0.492622
'MSMEG_1349 '	0.493438	-0.306767	0.000249155	0.000374665	0.000278831	0.0003098	0.900036	0.306767
'MSMEG_1350 '	0.0304131	-1.51694	0.000267131	0.000308817	0.000223561	0.00031941	0.699919	1.51694
'MSMEG_1351 '	0.75997	-0.119204	0.000399094	0.000342232	0.000321704	0.000295713	1.08789	0.119204
'MSMEG_1352 '	0.141774	-0.848402	0.000164571	0.000151023	0.000113123	0.000143598	0.78778	0.848402
'MSMEG_1353 '	NaN	#VALUE!	2.78697e-07	0	0	2.184e-07	0	#VALUE!
'MSMEG_1354 '	0.614262	-0.211646	0.00043003	0.000445645	0.000380591	0.000393556	0.967055	0.211646
'MSMEG_1355 '	0.00678089	-2.16871	0.000109389	0.00025662	0.000146286	0.00021567	0.678286	2.16871
'MSMEG_1356 '	0.0258749	-1.58712	8.29124e-05	7.92791e-05	0.000165295	0.000101665	1.62587	1.58712
'MSMEG_1357 '	0.351734	-0.453786	0.000119561	7.44743e-05	3.92575e-05	4.88123e-05	0.804253	0.453786
'MSMEG_1358 '	0.893334	-0.0489859	0.000148685	0.000182473	0.000152588	0.000157029	0.971713	0.0489859
'MSMEG_1359 '	0.534897	-0.27173	0.000148824	0.000133224	0.000107338	0.000112476	0.954322	0.27173
'MSMEG_1360 '	0.348144	-0.458241	0.000430169	0.000334042	0.000476358	0.000388315	1.22673	0.458241
'MSMEG_1361 '	0.988661	-0.00495252	0.000433792	0.000398907	0.000451047	0.000434615	1.03781	0.00495252
'MSMEG_1362 '	0.00010459	-3.98051	1.30988e-05	2.99208e-05	4.21501e-05	8.95439e-06	4.7072	3.98051
'MSMEG_1363 '	0.00109678	-2.95988	3.85995e-05	7.62215e-05	2.4071e-05	3.822e-06	6.29802	2.95988
'MSMEG_1364 '	NaN	#VALUE!	1.39349e-07	9.82799e-07	2.06618e-07	1.2012e-06	0.17201	#VALUE!
'MSMEG_1366 '	0.000185373	-3.73195	0.000154956	0.000167403	0.000190502	8.52851e-05	2.23371	3.73195
'MSMEG_1367 '	NaN	#VALUE!	2.78697e-07	0	0	1.092e-07	0	#VALUE!
'MSMEG_1368 '	0.0431323	-1.3652	1.22627e-05	9.17279e-06	2.35545e-05	8.18999e-06	2.87601	1.3652
'MSMEG_1369 '	0.090685	-1.04246	8.84863e-05	8.28827e-05	0.000163022	0.000112694	1.44658	1.04246
'MSMEG_1370 '	0.144815	-0.839187	7.3576e-05	0.000109309	0.000126244	8.82335e-05	1.43079	0.839187
'MSMEG_1371 '	0.139155	-0.856501	7.69204e-05	0.000122304	0.00010021	7.18535e-05	1.39464	0.856501
'MSMEG_1372 '	0.000295935	-3.5288	1.60251e-05	1.9656e-05	8.05811e-06	3.12312e-05	0.258015	3.5288
'MSMEG_1373 '	0.0976604	-1.01028	0.000118446	0.000149058	0.000134715	0.000183456	0.734319	1.01028
'MSMEG_1374 '	0.84062	-0.0754003	0.000212925	0.000188807	8.10976e-05	8.46299e-05	0.958262	0.0754003
'MSMEG_1375 '	0.00406419	-2.39103	1.15659e-05	5.07779e-05	1.32236e-05	3.822e-05	0.345986	2.39103
'MSMEG_1376 '	0.177621	-0.750506	8.77896e-06	3.89843e-05	4.61792e-05	2.74092e-05	1.68481	0.750506
'MSMEG_1378 '	0.70239	-0.153422	6.41003e-06	4.10591e-05	1.99387e-05	2.35872e-05	0.845318	0.153422
'MSMEG_1379 '	0.312387	-0.505307	0.000203031	0.000174829	0.0001124	0.000135408	0.830087	0.505307
'MSMEG_1380 '	0.000495264	-3.30516	3.0378e-05	3.93119e-06	2.73769e-05	4.04039e-06	6.7758	3.30516
'MSMEG_1381 '	0.367824	-0.434359	0.000105347	0.000147747	0.000160749	0.000124597	1.29015	0.434359
'MSMEG_1382 '	0.192695	-0.715129	0.000343355	0.000535844	0.000443299	0.000539011	0.822432	0.715129
'MSMEG_1383 '	0.0329767	-1.48179	0.000182825	0.000170133	0.000141533	0.000202238	0.699836	1.48179
'MSMEG_1384 '	0.122954	-0.910257	0.000296116	0.000285121	0.000251248	0.000305214	0.823186	0.910257
'MSMEG_1385 '	0.233487	-0.631737	0.000504302	0.000658257	0.000659628	0.000525142	1.2561	0.631737
'MSMEG_1386 '	0.901662	-0.0449562	0.000339592	0.000463117	0.000310857	0.000301392	1.03141	0.0449562
'MSMEG_1387 '	0.559832	-0.251942	0.000412472	0.000442369	0.000417885	0.000360796	1.15823	0.251942
'MSMEG_1388 '	0.152427	-0.816939	7.26006e-05	5.20883e-05	0.000153621	0.00011597	1.32466	0.816939
'MSMEG_1389 '	0.000250763	-3.60074	1.29594e-05	3.24324e-05	2.53107e-05	1.7472e-06	14.4865	3.60074
'MSMEG_1390 '	1	0	9.197e-06	1.911e-05	8.57465e-06	8.73599e-06	0.981532	0
'MSMEG_1391 '	0.696875	-0.156845	3.62306e-05	3.822e-05	5.00016e-05	4.56455e-05	1.09543	0.156845
'MSMEG_1392 '	0.996426	-0.00155493	3.9575e-05	4.23695e-05	4.71089e-05	4.33523e-05	1.08665	0.00155493
'MSMEG_1393 '	0.198297	-0.702685	0.000160111	0.000183237	7.41759e-05	9.52223e-05	0.778977	0.702685
'MSMEG_1394 '	0.0145394	-1.83745	0.00011343	7.10891e-05	8.04778e-05	0.000131695	0.611092	1.83745
'MSMEG_1395 '	0.00353456	-2.45166	0.000187145	0.000227682	0.000265814	0.000152661	1.7412	2.45166
'MSMEG_1396 '	0.194216	-0.711716	0.000155234	0.000178651	9.13252e-05	0.000111384	0.819914	0.711716
'MSMEG_1397 '	0.431016	-0.365507	0.000168194	0.000150041	0.000148972	0.000121976	1.22132	0.365507
'MSMEG_1399 '	NaN	#VALUE!	0	1.092e-07	1.03309e-07	0	#DIV/0!	#VALUE!
'MSMEG_1400 '	NaN	#VALUE!	2.78697e-07	0	1.03309e-07	0	#DIV/0!	#VALUE!
'MSMEG_1401 '	NaN	#VALUE!	0	0	0	3.276e-07	0	#VALUE!
'MSMEG_1402 '	0.523707	-0.280912	8.26337e-05	2.15124e-05	5.12413e-05	4.00763e-05	1.27859	0.280912
'MSMEG_1403 '	0.96466	-0.0156259	0.000159554	0.000214469	0.00019794	0.00019383	1.02121	0.0156259
'MSMEG_1404 '	0.885336	-0.0528919	0.000365511	0.000380889	0.00036809	0.000356101	1.03367	0.0528919
'MSMEG_1405 '	0.833296	-0.0792009	0.000320084	0.000309363	0.000296807	0.00029615	1.00222	0.0792009
'MSMEG_1406 '	0.328558	-0.483387	9.29455e-05	7.30547e-05	0.000106305	8.35379e-05	1.27254	0.483387
'MSMEG_1407 '	0.656546	-0.182735	0.000170005	0.000173519	0.000135955	0.000115533	1.17676	0.182735
'MSMEG_1408 '	0.403846	-0.393784	0.000159136	0.000166202	0.000252384	0.000224624	1.12358	0.393784
'MSMEG_1409 '	0.161275	-0.792433	0.000326215	0.000408735	0.000431625	0.000326944	1.32018	0.792433
'MSMEG_1410 '	0.00508071	-2.29408	8.12402e-05	5.53643e-05	6.28119e-05	0.000126344	0.497149	2.29408
'MSMEG_1411 '	1.74177e-05	-4.75901	3.83208e-05	0.000117281	1.93188e-05	7.19627e-05	0.268456	4.75901
'MSMEG_1412 '	0.00469838	-2.32805	0.000235917	0.000246246	0.000209304	0.000334807	0.625149	2.32805
'MSMEG_1413 '	0.217377	-0.662786	5.2395e-05	4.33523e-05	8.76061e-05	6.12611e-05	1.43004	0.662786
'MSMEG_1414 '	0.0285657	-1.54416	0.000229646	0.000204422	0.000156617	0.000217745	0.719268	1.54416
'MSMEG_1415 '	0.000564559	-3.24829	0.000127643	9.75155e-05	3.78111e-05	9.10727e-05	0.415175	3.24829
'MSMEG_1416 '	0.256825	-0.590362	0.000226999	0.000262516	0.000173766	0.000210865	0.824062	0.590362
'MSMEG_1417 '	0.443693	-0.352918	4.79359e-05	2.21676e-05	2.15916e-05	2.58804e-05	0.834285	0.352918
'MSMEG_1418 '	0.00639405	-2.19422	0.000171538	0.000111384	0.000116946	6.14795e-05	1.90219	2.19422
'MSMEG_1419 '	0.820315	-0.0860195	5.50427e-05	7.55663e-05	0.0001124	0.000101337	1.10917	0.0860195
'MSMEG_1420 '	0.315266	-0.501323	7.02317e-05	5.64563e-05	5.84729e-05	4.42259e-05	1.32214	0.501323
'MSMEG_1421 '	0.00560143	-2.2517	5.36492e-05	0.000113459	7.37627e-05	0.000130057	0.567156	2.2517
'MSMEG_1422 '	0.00550275	-2.25942	2.63369e-05	4.38983e-05	7.01469e-05	3.07944e-05	2.27791	2.25942
'MSMEG_1423 '	0.0020907	-2.67971	3.24682e-05	4.82663e-05	6.84939e-05	2.90472e-05	2.35802	2.67971
'MSMEG_1424 '	0.104442	-0.981124	0.000119979	0.000138029	0.000182237	0.000121758	1.49672	0.981124
'MSMEG_1425 '	0.246834	-0.607595	0.000116774	0.000122631	0.000199593	0.000155719	1.28175	0.607595
'MSMEG_1426 '	0.239239	-0.621168	2.85664e-05	2.99208e-05	4.44229e-05	5.36171e-05	0.828521	0.621168
'MSMEG_1427 '	0.821236	-0.0855322	7.17645e-05	8.02619e-05	0.000115086	0.000125907	0.914055	0.0855322
'MSMEG_1428 '	0.0113538	-1.94486	2.88451e-05	1.15752e-05	1.64261e-05	3.6036e-06	4.55827	1.94486
'MSMEG_1429 '	0.747928	-0.12614	0.000191744	0.000175047	0.000187919	0.000185312	1.01407	0.12614
'MSMEG_1430 '	0.933768	-0.0297609	5.30918e-05	4.06223e-05	1.88023e-05	1.84548e-05	1.01883	0.0297609
'MSMEG_1431 '	0.375497	-0.425394	0.000776171	0.000824241	0.000776058	0.000862133	0.90016	0.425394
'MSMEG_1432 '	0.29556	-0.529355	0.000244557	0.000230849	0.00028534	0.000338738	0.842361	0.529355
'MSMEG_1433 '	0.170327	-0.768718	0.000177669	0.000113131	0.000161162	0.000197324	0.816738	0.768718
'MSMEG_1434 '	0.465764	-0.331834	0.000125832	9.30383e-05	3.85343e-05	4.87031e-05	0.791208	0.331834
'MSMEG_1439 '	NaN	#VALUE!	0	1.092e-07	1.03309e-07	1.092e-07	0.946055	#VALUE!
'MSMEG_1442 '	NaN	#VALUE!	0	0	0	2.184e-07	0	#VALUE!
'MSMEG_1443 '	NaN	#VALUE!	0	0	0	1.092e-07	0	#VALUE!
'MSMEG_1444 '	NaN	#VALUE!	0	0	0	1.092e-07	0	#VALUE!
'MSMEG_1446 '	0.000165674	-3.78075	3.65093e-05	4.33523e-05	6.17788e-05	1.97652e-05	3.12564	3.78075
'MSMEG_1447 '	0.575794	-0.239732	7.49695e-05	5.88587e-05	7.66553e-05	7.89515e-05	0.970917	0.239732
'MSMEG_1448 '	0.934711	-0.0293227	0.000182407	0.000116298	0.000125727	0.000118373	1.06213	0.0293227
'MSMEG_1449 '	0.181893	-0.740184	8.77896e-06	8.29919e-06	5.76465e-05	3.74556e-05	1.53906	0.740184
'MSMEG_1450 '	0.00133967	-2.873	1.8394e-05	1.08108e-05	2.41743e-05	1.9656e-06	12.2987	2.873
'MSMEG_1451 '	0.891722	-0.0497707	0.000585403	0.000517607	0.000592788	0.000583127	1.01657	0.0497707
'MSMEG_1452 '	0.0119732	-1.92179	3.16321e-05	0.00010505	9.23583e-05	0.000150368	0.614214	1.92179
'MSMEG_1453 '	0.0752944	-1.12324	0.000225605	0.000190445	0.0001717	0.000236745	0.725251	1.12324
'MSMEG_1454 '	NaN	#VALUE!	1.96481e-05	1.04832e-05	0	4.58639e-06	0	#VALUE!
'MSMEG_1455 '	0.542886	-0.265291	0.000162759	0.000131258	0.000140604	0.000121321	1.15894	0.265291
'MSMEG_1456 '	0.0206987	-1.68406	0.00019035	0.00015146	0.000253417	0.000153644	1.64938	1.68406
'MSMEG_1457 '	7.52217e-05	-4.12366	0	9.82799e-06	0	1.81272e-05	0	4.12366
'MSMEG_1458 '	0.199624	-0.699786	0.000231737	0.000221021	0.000228416	0.00028654	0.797152	0.699786
'MSMEG_1459 '	0.683072	-0.165533	1.30988e-05	5.97323e-05	4.61792e-05	4.21511e-05	1.09556	0.165533
'MSMEG_1460 '	0.000165742	-3.78057	9.39209e-05	6.92327e-05	1.84923e-05	6.60659e-05	0.279907	3.78057
'MSMEG_1461 '	0.607702	-0.216309	7.0371e-05	8.49575e-05	6.58079e-05	7.05431e-05	0.932875	0.216309
'MSMEG_1462 '	0.000748977	-3.12553	2.1181e-05	3.276e-06	2.28313e-05	5.94047e-05	0.384335	3.12553
'MSMEG_1463 '	0.0511917	-1.2908	3.98537e-05	8.48483e-05	0.000123868	7.28363e-05	1.70063	1.2908
'MSMEG_1464 '	0.566704	-0.246644	0.000152029	0.000203985	0.000167257	0.000168823	0.990727	0.246644
'MSMEG_1475 '	2.98629e-05	-4.52487	3.6788e-05	9.14003e-05	2.17982e-05	7.80779e-05	0.279185	4.52487
'MSMEG_1476 '	3.09116e-07	-6.50988	0.000170702	0.000150914	6.78741e-05	0.000187715	0.361581	6.50988
'MSMEG_1477 '	0.872718	-0.0591259	0.000563386	0.000623859	0.000685972	0.000664481	1.03234	0.0591259
'MSMEG_1478 '	0.0476547	-1.32189	0.000131545	0.000124706	0.000173353	0.000110838	1.56402	1.32189
'MSMEG_1479 '	0.000182392	-3.73899	7.94287e-05	4.44443e-05	7.24197e-05	2.10756e-05	3.43619	3.73899
'MSMEG_1480 '	0.706601	-0.150826	0.000136562	0.000111056	7.06634e-05	6.07151e-05	1.16385	0.150826
'MSMEG_1481 '	8.72913e-08	-7.05903	9.32242e-05	0.000103412	0.000124591	3.04668e-05	4.0894	7.05903
'MSMEG_1482 '	0.562861	-0.249599	0.000102282	0.000145345	0.000173559	0.000148184	1.17124	0.249599
'MSMEG_1483 '	NaN	#VALUE!	8.63961e-06	0	1.03309e-07	0	#DIV/0!	#VALUE!
'MSMEG_1485 '	0.614544	-0.211447	0.000426128	0.000299644	0.000349081	0.000334042	1.04502	0.211447
'MSMEG_1486 '	0.596651	-0.224279	0.000181292	9.07451e-05	0.000152794	0.000163035	0.937184	0.224279
'MSMEG_1487 '	0.484333	-0.314856	5.78296e-05	4.73927e-05	7.70686e-05	8.60495e-05	0.895631	0.314856
'MSMEG_1488 '	0.00425983	-2.37061	7.23219e-05	8.80151e-05	0.000118392	5.99507e-05	1.97483	2.37061
'MSMEG_1489 '	0.0619798	-1.20775	8.5978e-05	0.00013377	8.70896e-05	5.20883e-05	1.67196	1.20775
'MSMEG_1490 '	0.661038	-0.179773	0.000240516	0.000210974	0.000185233	0.000209555	0.883938	0.179773
'MSMEG_1491 '	0.312684	-0.504894	0.000203449	0.000103085	0.000174179	0.000133442	1.30528	0.504894
'MSMEG_1493 '	1.60935e-06	-5.79335	6.67479e-05	4.83755e-05	5.20678e-05	5.67839e-06	9.16946	5.79335
'MSMEG_1494 '	0.605303	-0.218027	9.68472e-05	0.000138247	0.000117979	0.000125471	0.940291	0.218027
'MSMEG_1495 '	0.000367574	-3.43466	9.90768e-05	0.000125907	0.000206412	0.000103631	1.9918	3.43466
'MSMEG_1496 '	0.0869735	-1.06061	1.53283e-05	4.91399e-06	5.06215e-06	1.61616e-05	0.313221	1.06061
'MSMEG_1497 '	0.205308	-0.687593	0.000159833	0.000245044	0.000172216	0.00021567	0.798518	0.687593
'MSMEG_1498 '	0.191071	-0.718804	0.000208187	0.000247884	0.00031127	0.000233032	1.33574	0.718804
'MSMEG_1499 '	0.157524	-0.802653	0.000191883	0.00018968	0.000178931	0.00012689	1.41013	0.802653
'MSMEG_1500 '	0.00646325	-2.18955	7.66417e-05	8.15723e-05	4.44229e-05	8.08079e-05	0.549735	2.18955
'MSMEG_1501 '	0.978165	-0.00958802	0.000152865	0.000207807	0.000135438	0.000124051	1.09179	0.00958802
'MSMEG_1502 '	0.393894	-0.404621	8.45846e-05	7.20719e-05	9.43212e-05	0.000110838	0.850984	0.404621
'MSMEG_1503 '	0.0338926	-1.46989	6.35429e-05	7.52387e-05	4.70056e-05	8.41931e-05	0.558307	1.46989
'MSMEG_1504 '	0.0319198	-1.49594	0.000216687	9.74063e-05	0.000129343	0.00020475	0.631713	1.49594
'MSMEG_1505 '	0.161512	-0.791795	9.22487e-05	6.63935e-05	5.23777e-05	7.22903e-05	0.724547	0.791795
'MSMEG_1506 '	0.0691307	-1.16033	0.000390455	0.000284902	0.000337407	0.000224187	1.50502	1.16033
'MSMEG_1507 '	3.37825e-08	-7.47131	9.87981e-05	0.000106361	8.16142e-06	6.42095e-05	0.127106	7.47131
'MSMEG_1508 '	0.0429707	-1.36683	0.000199686	0.000251596	0.000227177	0.000153972	1.47544	1.36683
'MSMEG_1509 '	1.33974e-06	-5.87298	0.000139627	8.02619e-05	3.36788e-05	0.000112476	0.299431	5.87298
'MSMEG_1510 '	0.0279131	-1.55419	4.04111e-06	1.638e-06	1.95254e-05	6.11519e-06	3.19294	1.55419
'MSMEG_1513 '	0.890654	-0.0502908	0.000225605	0.000189899	0.000205792	0.000208353	0.987705	0.0502908
'MSMEG_1514 '	0.0779896	-1.10796	0.000225187	0.000169041	0.000130066	0.000165875	0.784123	1.10796
'MSMEG_1515 '	0.0502032	-1.29927	0.000100888	8.70323e-05	0.000132339	8.75783e-05	1.51109	1.29927
'MSMEG_1516 '	0.822946	-0.0846286	0.000660373	0.000775865	0.000842382	0.000820419	1.02677	0.0846286
'MSMEG_1517 '	0.332158	-0.478655	0.000362864	0.000392355	0.000301353	0.000337318	0.893377	0.478655
'MSMEG_1518 '	0.610371	-0.214406	0.000582059	0.000539011	0.000506215	0.000419327	1.20721	0.214406
'MSMEG_1523 '	NaN	#VALUE!	0	0	0	1.092e-07	0	#VALUE!
'MSMEG_1524 '	NaN	#VALUE!	0	0	2.06618e-07	0	#DIV/0!	#VALUE!
'MSMEG_1525 '	0.958754	-0.0182926	3.00993e-05	3.94211e-05	4.21501e-05	4.07315e-05	1.03483	0.0182926
'MSMEG_1526 '	0.724811	-0.139775	0.000176694	0.000163581	0.000161885	0.000170789	0.94787	0.139775
'MSMEG_1527 '	0.156668	-0.805019	2.60582e-05	1.23396e-05	1.28103e-05	7.53479e-06	1.70016	0.805019
'MSMEG_1528 '	0.1245	-0.904832	7.3576e-05	0.000136827	0.000150625	9.88259e-05	1.52414	0.904832
'MSMEG_1529 '	0.0401296	-1.39654	0.000115938	0.000181818	0.000150831	9.70787e-05	1.5537	1.39654
'MSMEG_1530 '	0.325998	-0.486785	0.00022881	0.000326726	0.000406934	0.000319519	1.27359	0.486785
'MSMEG_1531 '	0.196885	-0.705788	2.88451e-05	3.68004e-05	2.62405e-05	1.57248e-05	1.66874	0.705788
'MSMEG_1532 '	0.0693082	-1.15922	5.99199e-05	8.46299e-05	3.77078e-05	5.65655e-05	0.666622	1.15922
'MSMEG_1533 '	0.00020752	-3.68294	3.52552e-05	3.41796e-05	8.99822e-05	3.24324e-05	2.77446	3.68294
'MSMEG_1534 '	NaN	#VALUE!	1.75579e-05	0	3.51251e-06	0	#DIV/0!	#VALUE!
'MSMEG_1535 '	0.0249153	-1.60353	9.7544e-06	2.16216e-05	1.35335e-05	3.36336e-05	0.402381	1.60353
'MSMEG_1536 '	0.469201	-0.328641	0.000279951	0.000250068	0.000307964	0.000340704	0.903907	0.328641
'MSMEG_1537 '	0.758407	-0.120098	6.06166e-05	1.911e-05	7.7895e-05	7.14167e-05	1.09071	0.120098
'MSMEG_1539 '	0.169789	-0.770091	1.17053e-05	1.75812e-05	4.44229e-06	1.092e-05	0.406804	0.770091
'MSMEG_1540 '	0.790966	-0.101842	0.000111618	0.000113786	0.000108268	9.00899e-05	1.20178	0.101842
'MSMEG_1541 '	0.486602	-0.312826	6.08953e-05	7.58939e-05	9.81436e-05	0.000109637	0.895172	0.312826
'MSMEG_1542 '	0.710942	-0.148166	0.000113848	0.000162271	0.00018296	0.00017876	1.0235	0.148166
'MSMEG_1543 '	0.381244	-0.418796	0.000360495	0.000247119	0.000414373	0.000343543	1.20618	0.418796
'MSMEG_1544 '	4.99002e-07	-6.3019	0	1.23396e-05	0	3.31968e-05	0	6.3019
'MSMEG_1545 '	0.460617	-0.33666	3.53945e-05	2.76276e-05	3.61582e-05	4.65191e-05	0.777275	0.33666
'MSMEG_1546 '	0.303022	-0.518526	4.44522e-05	1.98744e-05	6.61178e-05	4.88123e-05	1.35453	0.518526
'MSMEG_1547 '	0.153962	-0.812586	0.00014757	9.59867e-05	0.000144219	0.000181709	0.793686	0.812586
'MSMEG_1548 '	NaN	#VALUE!	1.61644e-05	9.06359e-06	0	2.184e-06	0	#VALUE!
'MSMEG_1549 '	0.826844	-0.0825764	4.97474e-05	8.29919e-06	3.87409e-05	3.40704e-05	1.13709	0.0825764
'MSMEG_1551 '	0.000918618	-3.03686	1.2402e-05	1.2012e-05	1.19839e-05	0	#DIV/0!	3.03686
'MSMEG_1552 '	0.321954	-0.492206	0.000258352	0.000354463	0.000332345	0.000367894	0.903372	0.492206
'MSMEG_1553 '	0.119514	-0.922582	0.000255565	0.00035217	0.000269327	0.00019383	1.3895	0.922582
'MSMEG_1554 '	0.75801	-0.120325	9.25274e-05	7.45835e-05	9.17385e-05	9.21647e-05	0.995376	0.120325
'MSMEG_1555 '	0.571607	-0.242902	0.000389897	0.000354572	0.000435448	0.000463007	0.940477	0.242902
'MSMEG_1557 '	NaN	#VALUE!	0	0	1.03309e-07	0	#DIV/0!	#VALUE!
'MSMEG_1558 '	0.838169	-0.0766686	5.99199e-05	4.41167e-05	5.87829e-05	6.12611e-05	0.959546	0.0766686
'MSMEG_1560 '	0.000233901	-3.63097	1.53283e-05	2.8938e-05	7.64487e-06	3.34152e-05	0.228785	3.63097
'MSMEG_1561 '	0.153259	-0.814573	4.75178e-05	7.45835e-05	3.89475e-05	2.11848e-05	1.83847	0.814573
'MSMEG_1562 '	0.392467	-0.406197	5.78296e-05	8.70323e-05	5.94027e-05	4.76111e-05	1.24766	0.406197
'MSMEG_1563 '	0.997639	-0.00102643	6.1592e-05	8.83427e-05	8.20274e-05	8.33195e-05	0.984492	0.00102643
'MSMEG_1564 '	0.799728	-0.0970579	0.000147291	0.000162489	0.000203726	0.000206825	0.985016	0.0970579
'MSMEG_1565 '	0.331219	-0.479885	3.37223e-05	6.42095e-05	4.49395e-05	3.28692e-05	1.36722	0.479885
'MSMEG_1566 '	0.112013	-0.950731	0.000247204	0.0002374	0.000265814	0.000189789	1.40058	0.950731
'MSMEG_1567 '	0.000918618	-3.03686	8.63961e-06	4.25879e-06	1.25004e-05	0	#DIV/0!	3.03686
'MSMEG_1568 '	NaN	#VALUE!	0	0	3.09927e-07	1.092e-07	2.83817	#VALUE!
'MSMEG_1569 '	0.0796743	-1.09868	0	4.36799e-07	1.51864e-05	5.67839e-06	2.67442	1.09868
'MSMEG_1570 '	0.0893575	-1.04887	7.06497e-05	6.75947e-05	9.37013e-05	5.92955e-05	1.58024	1.04887
'MSMEG_1571 '	0.505874	-0.295958	0.000228253	0.000218072	0.000192981	0.000164455	1.17346	0.295958
'MSMEG_1572 '	0.0668516	-1.17489	0.000102839	0.000132678	8.93624e-05	0.000129729	0.688836	1.17489
'MSMEG_1573 '	0.248487	-0.604696	0.000275631	0.00020606	0.000263232	0.000199508	1.3194	0.604696
'MSMEG_1574 '	0.904946	-0.0433773	0.000292911	0.000489434	0.000405282	0.000374774	1.0814	0.0433773
'MSMEG_1575 '	NaN	#VALUE!	0	0	0	1.092e-07	0	#VALUE!
'MSMEG_1576 '	0.000881191	-3.05493	5.89444e-05	4.31339e-05	0.000102689	4.13867e-05	2.48121	3.05493
'MSMEG_1577 '	0.0219718	-1.65813	3.62306e-06	1.00464e-05	0	7.09799e-06	0	1.65813
'MSMEG_1578 '	0.0219718	-1.65813	2.53614e-05	1.5288e-05	6.40516e-06	0	#DIV/0!	1.65813
'MSMEG_1579 '	0.818927	-0.0867549	1.54677e-05	4.01855e-05	3.58483e-05	3.87659e-05	0.924736	0.0867549
'MSMEG_1580 '	0.273738	-0.562664	4.69605e-05	3.41796e-05	1.69427e-05	1.07016e-05	1.58319	0.562664
'MSMEG_1581 '	0.301484	-0.520736	0.000157324	0.000162053	0.000173353	0.000130712	1.32622	0.520736
'MSMEG_1583 '	0.0118274	-1.92711	7.77565e-05	5.71115e-05	7.51057e-05	0.000127545	0.588854	1.92711
'MSMEG_1584 '	2.44517e-09	-8.61169	0.000166382	9.06359e-05	0.000161782	3.39612e-05	4.76374	8.61169
'MSMEG_1585 '	0.736	-0.133122	8.65354e-05	0.000142833	0.000127587	0.00012831	0.994364	0.133122
'MSMEG_1586 '	0.700816	-0.154396	0.000194531	0.000176795	0.000222631	0.000222986	0.998408	0.154396
'MSMEG_1587 '	0.942521	-0.0257089	0.000175718	0.000240895	0.000257033	0.000250614	1.02561	0.0257089
'MSMEG_1588 '	0.0640671	-1.19336	0.000145759	0.000135954	9.41146e-05	0.000134207	0.701266	1.19336
'MSMEG_1589 '	0.030739	-1.51231	1.54677e-05	1.5834e-05	5.26876e-06	1.86732e-05	0.282157	1.51231
'MSMEG_1591 '	0.906549	-0.0426085	0.000232015	0.000259131	0.000229553	0.000219929	1.04376	0.0426085
'MSMEG_1592 '	0.00516137	-2.28724	0.000188539	0.000111821	0.00024226	0.000141305	1.71445	2.28724
'MSMEG_1594 '	7.03171e-06	-5.15294	4.62637e-05	5.30711e-05	8.28539e-05	1.87824e-05	4.41126	5.15294
'MSMEG_1595 '	0.00549732	-2.25985	0.000158439	8.74691e-05	8.86392e-05	0.000150696	0.588199	2.25985
'MSMEG_1596 '	0.488092	-0.311498	0.000107995	0.000101447	9.00855e-05	7.26179e-05	1.24054	0.311498
'MSMEG_1597 '	0.0353031	-1.45219	0	4.14959e-06	1.47732e-05	2.9484e-06	5.01059	1.45219
'MSMEG_1598 '	0.762686	-0.117654	0.000143668	0.000139557	0.00015765	0.000149604	1.05378	0.117654
'MSMEG_1599 '	0.0109636	-1.96005	4.72392e-05	4.94675e-05	1.80791e-05	4.07315e-05	0.44386	1.96005
'MSMEG_1600 '	4.58504e-08	-7.33866	7.41334e-05	4.95767e-05	2.16949e-05	0.000109964	0.197291	7.33866
'MSMEG_1601 '	0.00161193	-2.79265	0.000189932	0.00011739	0.000259409	0.000136391	1.90196	2.79265
'MSMEG_1603 '	NaN	#VALUE!	9.89375e-06	2.0202e-05	0	2.6208e-06	0	#VALUE!
'MSMEG_1604 '	0.0345029	-1.46214	0.000444104	0.000411356	0.000397327	0.000531913	0.746978	1.46214
'MSMEG_1605 '	0.0453364	-1.34355	2.84271e-05	4.45535e-05	4.73156e-05	7.26179e-05	0.651569	1.34355
'MSMEG_1606 '	0.811578	-0.0906695	8.47239e-05	8.59403e-05	6.46715e-05	5.55827e-05	1.16352	0.0906695
'MSMEG_1607 '	0.00198509	-2.70222	2.27138e-05	2.5116e-05	0	1.17936e-05	0	2.70222
'MSMEG_1608 '	0.743682	-0.128613	0.000290263	0.000352279	0.00031437	0.000285558	1.1009	0.128613
'MSMEG_1609 '	0.243838	-0.612898	5.69935e-05	8.44115e-05	7.14899e-05	8.74691e-05	0.817316	0.612898
'MSMEG_1611 '	0.523046	-0.28146	3.56732e-05	7.70951e-05	7.73785e-05	6.44279e-05	1.20101	0.28146
'MSMEG_1612 '	0.212907	-0.67181	0.000136283	9.64235e-05	7.14899e-05	0.000101119	0.706987	0.67181
'MSMEG_1613 '	0.20876	-0.680353	9.67079e-05	7.01063e-05	8.3577e-05	0.000107999	0.773871	0.680353
'MSMEG_1614 '	0.00110097	-2.95822	6.13134e-05	6.66119e-05	0.000135025	6.57383e-05	2.05398	2.95822
'MSMEG_1615 '	1	0	8.73715e-05	3.85476e-05	6.09524e-05	5.24159e-05	1.16286	0
'MSMEG_1616 '	0.316936	-0.499028	0.000152447	0.000164018	0.000196907	0.000215997	0.911618	0.499028
'MSMEG_1617 '	0.972021	-0.0123245	0.000344191	0.0003549	0.00035435	0.000365383	0.969805	0.0123245
'MSMEG_1618 '	0.000918618	-3.03686	4.5985e-06	5.89679e-06	1.20872e-05	0	#DIV/0!	3.03686
'MSMEG_1620 '	0.00273656	-2.56279	3.20502e-05	3.03576e-05	6.50847e-06	2.5662e-05	0.253623	2.56279
'MSMEG_1621 '	0.806532	-0.0933786	9.11339e-05	7.98251e-05	5.20678e-05	5.39447e-05	0.965206	0.0933786
'MSMEG_1622 '	0.00157977	-2.80141	5.68542e-05	5.08871e-05	8.23373e-05	3.61452e-05	2.27796	2.80141
'MSMEG_1623 '	0.890013	-0.0506035	0.000325658	0.000288943	0.000232342	0.000232159	1.00079	0.0506035
'MSMEG_1624 '	0.34299	-0.464719	3.46978e-05	2.53344e-05	1.35335e-05	1.95468e-05	0.692364	0.464719
'MSMEG_1625 '	0.281824	-0.550022	0.000300714	0.000327381	0.000390198	0.00032476	1.2015	0.550022
'MSMEG_1626 '	0.865226	-0.0628704	8.09615e-05	9.87167e-05	8.6573e-05	8.62679e-05	1.00354	0.0628704
'MSMEG_1628 '	0.000777679	-3.1092	3.76241e-05	7.73135e-05	8.78127e-06	3.39612e-05	0.258568	3.1092
'MSMEG_1629 '	0.316732	-0.499308	0.000171399	0.000123833	0.000205688	0.000170461	1.20666	0.499308
'MSMEG_1630 '	0.103243	-0.98614	0.000342519	0.000251706	0.000295464	0.000404039	0.731275	0.98614
'MSMEG_1631 '	0.00558978	-2.25261	0.000175161	0.000272563	0.000111884	0.00018837	0.593958	2.25261
'MSMEG_1632 '	0.271692	-0.565923	5.57394e-07	5.78759e-06	3.41953e-05	2.22768e-05	1.53502	0.565923
'MSMEG_1633 '	0.0326213	-1.4865	0.000228532	0.000205296	0.000156307	0.000225061	0.694508	1.4865
'MSMEG_1634 '	0.0290784	-1.53643	7.30186e-05	0.000125689	4.92784e-05	2.48976e-05	1.97925	1.53643
'MSMEG_1635 '	0.266961	-0.573551	8.97405e-05	4.59731e-05	9.03954e-05	0.000106142	0.851644	0.573551
'MSMEG_1636 '	0.150704	-0.821876	0.000143668	0.000201474	0.000233479	0.000291891	0.799882	0.821876
'MSMEG_1637 '	0.0308407	-1.51088	0.000416373	0.000305214	0.000314473	0.000191537	1.64184	1.51088
'MSMEG_1638 '	0.00185718	-2.73115	1.00331e-05	7.86239e-06	2.48975e-05	2.4024e-06	10.3636	2.73115
'MSMEG_1639 '	0.720196	-0.142549	0.000384881	0.000349221	0.00039929	0.000397597	1.00426	0.142549
'MSMEG_1640 '	0.25157	-0.599341	4.8772e-05	5.74391e-05	5.45472e-05	6.33359e-05	0.861236	0.599341
'MSMEG_1641 '	0.038556	-1.41391	7.76171e-05	7.96067e-05	5.69233e-05	3.07944e-05	1.8485	1.41391
'MSMEG_1642 '	0.268742	-0.570664	0.000316461	0.000397487	0.000230896	0.000276822	0.834096	0.570664
'MSMEG_1643 '	0.989902	-0.00440778	0.000627068	0.000612611	0.000626983	0.000607916	1.03136	0.00440778
'MSMEG_1644 '	0.319922	-0.494956	0.000201637	0.000103849	0.000217466	0.000172973	1.25723	0.494956
'MSMEG_1645 '	0.651582	-0.186031	0.000520885	0.000580179	0.000542269	0.000487687	1.11192	0.186031
'MSMEG_1646 '	1.00258e-07	-6.99888	2.25745e-05	5.12147e-05	3.90508e-05	0	#DIV/0!	6.99888
'MSMEG_1648 '	0.142934	-0.844864	0.000158439	0.000244608	0.000183993	0.000233032	0.789561	0.844864
'MSMEG_1649 '	0.918706	-0.0368235	0.000782442	0.000860495	0.000793207	0.000821292	0.965804	0.0368235
'MSMEG_1650 '	0.237312	-0.62468	6.03379e-05	7.50203e-05	8.30605e-05	6.48647e-05	1.28052	0.62468
'MSMEG_1652 '	0.602672	-0.219919	0.000133496	6.92327e-05	5.07248e-05	5.47091e-05	0.927172	0.219919
'MSMEG_1653 '	0.0933533	-1.02987	1.78366e-05	9.06359e-06	3.30589e-06	9.50039e-06	0.347974	1.02987
'MSMEG_1654 '	0.396676	-0.401564	1.65825e-05	1.3104e-06	2.07651e-05	1.35408e-05	1.53352	0.401564
'MSMEG_1655 '	0.636114	-0.196465	9.197e-05	0.000122522	5.45472e-05	4.82663e-05	1.13013	0.196465
'MSMEG_1656 '	0.786171	-0.104483	9.30848e-05	0.000112039	8.33704e-05	8.50667e-05	0.98006	0.104483
'MSMEG_1657 '	NaN	#VALUE!	2.78697e-07	0	0	1.092e-07	0	#VALUE!
'MSMEG_1658 '	0.230644	-0.637058	1.42135e-05	2.8938e-05	2.99596e-05	1.77996e-05	1.68317	0.637058
'MSMEG_1659 '	3.99917e-08	-7.39803	5.00261e-05	4.35707e-05	6.42582e-05	6.44279e-06	9.97367	7.39803
'MSMEG_1661 '	0.302751	-0.518914	4.82146e-05	0.000100901	0.000133269	0.000101993	1.30665	0.518914
'MSMEG_1662 '	0.436066	-0.360447	0.000179342	0.00022113	0.000168704	0.000180289	0.935741	0.360447
'MSMEG_1663 '	0.0283365	-1.54765	2.68943e-05	1.64892e-05	5.08281e-05	2.43516e-05	2.08726	1.54765
'MSMEG_1664 '	0.0381929	-1.41802	3.17715e-05	6.11519e-06	8.36804e-06	2.38056e-05	0.351516	1.41802
'MSMEG_1665 '	0.267673	-0.572395	0.000218359	0.000226262	0.000170047	0.000129074	1.31743	0.572395
'MSMEG_1666 '	0.866958	-0.062002	0.000185891	0.000324979	0.000205792	0.000205405	1.00188	0.062002
'MSMEG_1667 '	0.758979	-0.11977	0.000147013	0.000163909	0.000183064	0.000181818	1.00685	0.11977
'MSMEG_1668 '	0.00023656	-3.62606	6.13134e-05	5.13239e-05	1.29136e-05	4.93583e-05	0.26163	3.62606
'MSMEG_1671 '	NaN	#VALUE!	4.18046e-06	4.25879e-06	2.37611e-06	0	#DIV/0!	#VALUE!
'MSMEG_1672 '	NaN	#VALUE!	0	0	0	1.092e-07	0	#VALUE!
'MSMEG_1673 '	1.05041e-05	-4.97864	2.04842e-05	6.33359e-06	2.79968e-05	0	#DIV/0!	4.97864
'MSMEG_1674 '	0.545384	-0.263297	2.64762e-06	8.95439e-06	1.39467e-05	9.06359e-06	1.53876	0.263297
'MSMEG_1675 '	0.476335	-0.322088	5.58788e-05	7.54571e-05	4.42163e-05	4.95767e-05	0.891876	0.322088
'MSMEG_1676 '	0.200675	-0.697507	0.000162759	0.000146437	0.000161162	0.000196451	0.82037	0.697507
'MSMEG_1677 '	0.157231	-0.803463	0.000282599	0.000381326	0.000352387	0.000265465	1.32743	0.803463
'MSMEG_1678 '	0.246884	-0.607507	0.000254311	0.000220365	0.000216329	0.00025651	0.843354	0.607507
'MSMEG_1679 '	0.0159214	-1.79802	9.11339e-05	8.71415e-05	0.000150625	8.67047e-05	1.73721	1.79802
'MSMEG_1680 '	2.28589e-05	-4.64094	3.70667e-05	3.09036e-05	3.35755e-05	4.47719e-06	7.49922	4.64094
'MSMEG_1681 '	0.00934705	-2.02933	8.20763e-05	8.24459e-05	0.000110127	5.99507e-05	1.83697	2.02933
'MSMEG_1682 '	0.494593	-0.305752	8.36091e-05	0.00012689	0.000179448	0.000157357	1.14039	0.305752
'MSMEG_1683 '	0.230448	-0.637427	0.000277861	0.000299644	0.00032501	0.00026197	1.24064	0.637427
'MSMEG_1684 '	0.110779	-0.955543	0.000131266	0.000131586	6.97336e-05	9.48947e-05	0.734853	0.955543
'MSMEG_1686 '	0.000102157	-3.99073	1.39349e-05	1.86732e-05	4.33898e-06	3.03576e-05	0.142929	3.99073
'MSMEG_1687 '	0.586994	-0.231366	6.54938e-06	1.40868e-05	1.01243e-05	1.24488e-05	0.813275	0.231366
'MSMEG_1688 '	6.23475e-05	-4.20518	0	1.21212e-05	0	1.94376e-05	0	4.20518
'MSMEG_1689 '	0.0174857	-1.75732	1.32381e-05	3.41796e-05	2.46909e-05	4.61915e-05	0.534532	1.75732
'MSMEG_1690 '	0.0292547	-1.5338	3.51158e-05	4.09499e-05	3.93608e-05	6.60659e-05	0.59578	1.5338
'MSMEG_1691 '	0.0810284	-1.09136	0.000109946	0.000147747	0.000138434	8.65955e-05	1.59863	1.09136
'MSMEG_1692 '	0.0653322	-1.18487	5.43459e-05	0.000120229	5.45472e-05	7.92791e-05	0.68804	1.18487
'MSMEG_1693 '	0.147273	-0.831877	0.000183801	0.000146	0.000179345	0.000131913	1.35956	0.831877
'MSMEG_1694 '	0.449429	-0.347339	0.000102561	7.15259e-05	5.96093e-05	6.97787e-05	0.854263	0.347339
'MSMEG_1695 '	0.00466987	-2.3307	6.41003e-05	6.83591e-05	1.94221e-05	4.87031e-05	0.398786	2.3307
'MSMEG_1696 '	0.783459	-0.105984	3.83208e-05	3.83292e-05	3.45052e-05	3.40704e-05	1.01276	0.105984
'MSMEG_1697 '	0.000680253	-3.16733	7.20432e-05	5.78759e-05	0.000110747	4.71743e-05	2.34762	3.16733
'MSMEG_1698 '	0.374111	-0.427	8.04041e-05	8.36471e-05	0.00019701	0.000157575	1.25026	0.427
'MSMEG_1699 '	0.323933	-0.489544	0.000114544	6.12611e-05	8.01678e-05	6.23531e-05	1.28571	0.489544
'MSMEG_1701 '	0.0137048	-1.86313	0.000179481	0.000180071	6.15722e-05	0.000110073	0.559374	1.86313
'MSMEG_1702 '	0.965479	-0.0152571	6.46577e-05	6.23531e-05	5.50637e-05	5.29619e-05	1.03969	0.0152571
'MSMEG_1703 '	0.212765	-0.672101	6.27068e-05	5.49275e-05	6.79774e-05	4.79387e-05	1.41801	0.672101
'MSMEG_1704 '	0.421573	-0.375127	0.000150357	0.000132459	0.000111884	0.000131367	0.851686	0.375127
'MSMEG_1705 '	0.97598	-0.0105589	7.85926e-05	0.000100682	0.000139984	0.000138138	1.01336	0.0105589
'MSMEG_1706 '	0.00954029	-2.02044	7.71991e-05	7.68767e-05	4.47328e-05	8.09171e-05	0.552823	2.02044
'MSMEG_1708 '	0.0933533	-1.02987	1.75579e-05	4.22603e-05	1.04342e-05	3.4944e-06	2.98599	1.02987
'MSMEG_1709 '	0.802402	-0.0956078	0.000340986	0.000408298	0.000299286	0.00031122	0.961657	0.0956078
'MSMEG_1710 '	0.0275314	-1.56017	7.74778e-05	5.63471e-05	2.31412e-05	4.38983e-05	0.527155	1.56017
'MSMEG_1711 '	0.511714	-0.290972	6.96743e-06	3.7128e-05	2.17982e-05	2.93748e-05	0.742073	0.290972
'MSMEG_1712 '	1.72222e-06	-5.76391	1.92301e-05	2.457e-05	8.05811e-06	4.70651e-05	0.171212	5.76391
'MSMEG_1713 '	0.717519	-0.144166	6.3961e-05	0.000160415	9.98999e-05	0.000106907	0.934459	0.144166
'MSMEG_1714 '	0.987475	-0.0054739	4.66818e-05	2.2386e-05	3.56416e-05	3.45072e-05	1.03288	0.0054739
'MSMEG_1715 '	0.52684	-0.278321	0.000128201	9.17279e-05	0.000144943	0.000146328	0.990534	0.278321
'MSMEG_1716 '	0.0219718	-1.65813	1.39349e-07	7.09799e-06	5.26876e-06	0	#DIV/0!	1.65813
'MSMEG_1717 '	0.935964	-0.0287409	0.000200244	0.000188151	0.000148765	0.000153207	0.971005	0.0287409
'MSMEG_1718 '	0.535507	-0.271235	0.000331789	0.000335025	0.000229863	0.00018968	1.21184	0.271235
'MSMEG_1719 '	0.296801	-0.527535	0.000130152	0.000173628	0.000102999	0.000117936	0.873349	0.527535
'MSMEG_1720 '	0.30465	-0.516199	1.95088e-05	2.16216e-05	3.01663e-05	1.81272e-05	1.66415	0.516199
'MSMEG_1721 '	0.426536	-0.370044	0.000278279	0.000280753	0.000282344	0.000317007	0.890654	0.370044
'MSMEG_1722 '	0.0406433	-1.39101	0.000158997	0.000120666	0.000151554	0.000211302	0.717242	1.39101
'MSMEG_1723 '	0.000109632	-3.96006	8.2355e-05	0.000102429	6.41549e-05	0.000142615	0.449847	3.96006
'MSMEG_1724 '	0.016172	-1.79124	6.47971e-05	9.27107e-05	7.40726e-05	0.00011739	0.630997	1.79124
'MSMEG_1725 '	0.863881	-0.0635459	0.000151332	0.000139776	0.000107235	0.000113677	0.943329	0.0635459
'MSMEG_1726 '	0.537981	-0.269233	0.000502909	0.000369205	0.000363338	0.000380562	0.954742	0.269233
'MSMEG_1727 '	0.671917	-0.172684	6.73053e-05	6.86867e-05	8.34737e-05	7.37099e-05	1.13246	0.172684
'MSMEG_1728 '	0.323232	-0.490485	9.61505e-05	7.05431e-05	6.1159e-05	4.46627e-05	1.36935	0.490485
'MSMEG_1729 '	0.110676	-0.955945	0.000206375	0.00020606	0.000176555	0.000121649	1.45135	0.955945
'MSMEG_1730 '	0.964524	-0.0156869	0.00022254	0.000228665	0.000268087	0.000251269	1.06693	0.0156869
'MSMEG_1731 '	0.438554	-0.357977	0.000309354	0.000293202	0.000300629	0.000253344	1.18665	0.357977
'MSMEG_1732 '	0.216026	-0.665493	0.000568542	0.00044084	0.000549811	0.000445754	1.23344	0.665493
'MSMEG_1733 '	0.00160288	-2.7951	5.72722e-05	4.46627e-05	5.17579e-05	1.76904e-05	2.92576	2.7951
'MSMEG_1734 '	0.00370237	-2.43152	0.000109667	9.94811e-05	5.97126e-05	0.000109418	0.545728	2.43152
'MSMEG_1735 '	0.0203678	-1.69106	0.000317018	0.000284684	0.000177072	0.000273546	0.647321	1.69106
'MSMEG_1736 '	0.168885	-0.77241	0.000329699	0.000231941	0.000348358	0.000264482	1.31713	0.77241
'MSMEG_1737 '	0.0797323	-1.09837	0.000218638	0.000206497	0.00041272	0.00028938	1.42622	1.09837
'MSMEG_1738 '	0.385214	-0.414298	8.70928e-05	0.000103958	0.000109404	9.06359e-05	1.20708	0.414298
'MSMEG_1739 '	0.0772437	-1.11214	8.84863e-05	6.69395e-05	8.24406e-05	5.21975e-05	1.5794	1.11214
'MSMEG_1740 '	0.00540584	-2.26714	0.000286779	0.000243079	0.000166534	0.000259459	0.641852	2.26714
'MSMEG_1741 '	2.36205e-05	-4.62671	0.00017335	0.000120884	0.000260339	0.000103412	2.51749	4.62671
'MSMEG_1742 '	0.222799	-0.652087	0.000536492	0.000459731	0.000398257	0.000465301	0.855912	0.652087
'MSMEG_1743 '	0.326353	-0.486313	0.000350601	0.000215233	0.000193601	0.000161834	1.19629	0.486313
'MSMEG_1744 '	0.617314	-0.209494	0.000145062	0.000105705	0.000135542	0.000121321	1.11721	0.209494
'MSMEG_1745 '	0.00235266	-2.62844	0.000101167	9.32567e-05	0.000176142	9.36935e-05	1.87998	2.62844
'MSMEG_1746 '	0.000358129	-3.44596	9.197e-05	7.33823e-05	7.88248e-05	2.91564e-05	2.70352	3.44596
'MSMEG_1747 '	0.138067	-0.85991	0.000206515	0.00018968	0.000113433	7.69859e-05	1.47343	0.85991
'MSMEG_1748 '	0.000922078	-3.03523	6.13134e-06	4.04039e-06	3.02696e-05	6.44279e-06	4.69821	3.03523
'MSMEG_1749 '	0.6725	-0.172307	0.000133914	8.63771e-05	9.54576e-05	8.28827e-05	1.15172	0.172307
'MSMEG_1751 '	0.439896	-0.35665	0.000252639	0.000363854	0.000313336	0.000241987	1.29485	0.35665
'MSMEG_1752 '	1	0	3.81815e-05	7.97159e-06	1.67361e-05	1.45236e-05	1.15234	0
'MSMEG_1753 '	0.373323	-0.427915	3.6788e-05	2.2386e-05	4.4113e-05	3.1668e-05	1.39298	0.427915
'MSMEG_1754 '	0.784949	-0.105158	0.000161087	0.000193284	0.000143496	0.000148621	0.965518	0.105158
'MSMEG_1755 '	0.370106	-0.431674	0.00012193	9.42395e-05	0.000117669	0.000130057	0.90475	0.431674
'MSMEG_1756 '	0.000734672	-3.13391	0.000102282	0.000128528	9.89701e-05	0.0002006	0.49337	3.13391
'MSMEG_1757 '	0.575772	-0.23975	0.000474203	0.000467157	0.000540513	0.00056358	0.95907	0.23975
'MSMEG_1759 '	0.0376401	-1.42435	0.000187284	0.000201146	0.000246805	0.000167294	1.47528	1.42435
'MSMEG_1760 '	0.75778	-0.120457	0.000174604	0.000121103	0.000172216	0.000154081	1.1177	0.120457
'MSMEG_1761 '	0.137292	-0.862356	0.000617314	0.000526125	0.00056634	0.000725087	0.781065	0.862356
'MSMEG_1762 '	0.776272	-0.109986	6.60512e-05	0.000177777	0.00018513	0.000170352	1.08675	0.109986
'MSMEG_1763 '	0.00134237	-2.87213	0.000176694	0.000215342	0.000103826	0.00018564	0.559286	2.87213
'MSMEG_1764 '	0.818018	-0.0872372	0.000166661	0.00019929	0.000124901	0.000126344	0.988574	0.0872372
'MSMEG_1765 '	0.382065	-0.417863	2.82878e-05	2.76276e-05	6.71509e-05	5.07779e-05	1.32244	0.417863
'MSMEG_1767 '	0.000444683	-3.35195	3.65093e-05	5.90771e-05	6.35351e-05	2.26044e-05	2.81074	3.35195
'MSMEG_1768 '	0.20496	-0.688331	0.00012193	0.000118154	0.00011395	8.46299e-05	1.34645	0.688331
'MSMEG_1769 '	1	0	0	0	7.74818e-06	6.33359e-06	1.22335	0
'MSMEG_1771 '	0.031057	-1.50784	2.68943e-05	3.62544e-05	3.65714e-05	6.56291e-05	0.557244	1.50784
'MSMEG_1772 '	0.497508	-0.3032	7.62236e-05	5.30711e-05	4.33898e-05	5.20883e-05	0.833004	0.3032
'MSMEG_1773 '	0.895727	-0.0478244	0.000412193	0.000341468	0.000475738	0.000471197	1.00964	0.0478244
'MSMEG_1774 '	0.954832	-0.0200732	0.000119282	0.000148839	0.000186163	0.000177996	1.04588	0.0200732
'MSMEG_1775 '	0.119729	-0.921801	3.97143e-05	3.78924e-05	7.42792e-05	4.92491e-05	1.50823	0.921801
'MSMEG_1776 '	0.648926	-0.187805	6.13134e-05	3.81108e-05	3.95674e-05	3.35244e-05	1.18026	0.187805
'MSMEG_1778 '	0.49092	-0.308989	9.22487e-05	6.48647e-05	0.000105169	0.000122959	0.855314	0.308989
'MSMEG_1779 '	2.2772e-07	-6.6426	1.08692e-05	2.1294e-05	0	3.78924e-05	0	6.6426
'MSMEG_1780 '	0.0991377	-1.00376	0.000178366	0.000212721	0.000212094	0.000149822	1.41563	1.00376
'MSMEG_1781 '	0.218806	-0.659941	5.40672e-05	3.64728e-05	4.33898e-05	3.02484e-05	1.43445	0.659941
'MSMEG_1782 '	0.555948	-0.254966	0.000338617	0.00039301	0.000318605	0.000339284	0.939052	0.254966
'MSMEG_1783 '	0.00669808	-2.17405	2.89845e-05	9.06359e-06	2.31412e-05	5.11055e-05	0.452813	2.17405
'MSMEG_1785 '	0.0199829	-1.69934	0.000251106	0.000382418	0.000260132	0.000164237	1.58389	1.69934
'MSMEG_1786 '	0.00404558	-2.39302	0.000138094	9.84983e-05	0.0001155	0.00019383	0.595881	2.39302
'MSMEG_1787 '	0.391519	-0.407247	4.86326e-05	9.67511e-05	0.000143806	0.000115861	1.2412	0.407247
'MSMEG_1788 '	0.000353735	-3.45132	5.78296e-05	6.11519e-06	4.23567e-06	2.60988e-05	0.162294	3.45132
'MSMEG_1789 '	0.883362	-0.0538614	0.000139488	0.000125689	0.000136058	0.000120775	1.12654	0.0538614
'MSMEG_1790 '	0.00013061	-3.88402	3.00993e-05	1.98744e-05	0	1.95468e-05	0	3.88402
'MSMEG_1791 '	0.0880634	-1.0552	5.43459e-06	0	9.40113e-06	2.9484e-06	3.18856	1.0552
'MSMEG_1792 '	0.377228	-0.423396	3.23289e-05	7.43651e-05	6.14689e-05	6.92327e-05	0.887859	0.423396
'MSMEG_1793 '	0.00433803	-2.36271	6.35429e-05	6.21347e-05	3.72946e-05	7.28363e-05	0.512033	2.36271
'MSMEG_1794 '	0.018534	-1.73203	0.00025027	0.000248757	0.000248458	0.000374556	0.663342	1.73203
'MSMEG_1795 '	0.374524	-0.42652	0.000362446	0.000230521	0.000208891	0.000166748	1.25273	0.42652
'MSMEG_1796 '	0.382005	-0.417931	0.000629855	0.000604312	0.000675951	0.000543815	1.24298	0.417931
'MSMEG_1797 '	0.832948	-0.0793822	8.40272e-05	7.82963e-05	6.87005e-05	6.51923e-05	1.05381	0.0793822
'MSMEG_1798 '	0.507487	-0.294575	0.000500819	0.000500354	0.000421811	0.000469559	0.898312	0.294575
'MSMEG_1799 '	0.366169	-0.436319	0.000129873	0.000125798	0.000107235	0.00012285	0.872894	0.436319
'MSMEG_1801 '	0.0842839	-1.07426	2.32712e-05	1.05924e-05	3.95674e-05	2.08572e-05	1.89706	1.07426
'MSMEG_1802 '	0.0698316	-1.15595	5.46246e-05	7.61123e-05	4.04972e-05	6.00599e-05	0.674279	1.15595
'MSMEG_1803 '	0.342127	-0.465813	6.14527e-05	3.84384e-05	9.04988e-05	0.00011193	0.808531	0.465813
'MSMEG_1804 '	3.67351e-13	-12.4349	1.88121e-05	0.000102975	0.000135438	1.05924e-05	12.7864	12.4349
'MSMEG_1805 '	0.00270325	-2.56811	2.29925e-05	1.79088e-05	4.75222e-05	1.5834e-05	3.00128	2.56811
'MSMEG_1806 '	0.00313307	-2.50403	9.35029e-05	5.21975e-05	5.91961e-05	0.000113022	0.523758	2.50403
'MSMEG_1807 '	1.92141e-05	-4.71638	4.18046e-07	0	2.38644e-05	0	#DIV/0!	4.71638
'MSMEG_1808 '	0.00770801	-2.11306	8.50026e-05	3.58176e-05	5.39273e-05	9.83891e-05	0.548103	2.11306
'MSMEG_1809 '	0.628203	-0.2019	6.21494e-05	4.94675e-05	4.15303e-05	4.44443e-05	0.934433	0.2019
'MSMEG_1810 '	0.223058	-0.651583	6.27068e-05	6.36635e-05	5.90928e-05	4.14959e-05	1.42406	0.651583
'MSMEG_1811 '	0.0202177	-1.69427	3.34436e-05	2.4024e-05	4.49395e-05	8.00435e-05	0.561438	1.69427
'MSMEG_1813 '	NaN	#VALUE!	0	0	2.06618e-07	0	#DIV/0!	#VALUE!
'MSMEG_1814 '	0.648109	-0.188352	1.5189e-05	9.82799e-07	4.93817e-05	5.11055e-05	0.96627	0.188352
'MSMEG_1815 '	1	0	3.33043e-05	1.99836e-05	3.49185e-05	3.276e-05	1.06589	0
'MSMEG_1816 '	0.962407	-0.0166412	0.000204982	0.000198525	0.000218912	0.000203658	1.0749	0.0166412
'MSMEG_1817 '	0.00135818	-2.86704	2.1181e-05	9.39119e-06	1.03309e-07	1.38684e-05	0.00744925	2.86704
'MSMEG_1818 '	0.0219718	-1.65813	2.98206e-05	6.87959e-06	0	5.78759e-06	0	1.65813
'MSMEG_1820 '	0.00247788	-2.60592	1.75579e-05	2.95932e-05	1.48765e-05	3.97487e-05	0.374264	2.60592
'MSMEG_1821 '	1.80941e-05	-4.74246	8.70928e-05	4.67375e-05	4.89685e-05	1.02648e-05	4.77053	4.74246
'MSMEG_1823 '	0.712759	-0.147058	0.000166382	0.000137373	0.00011457	9.98087e-05	1.14789	0.147058
'MSMEG_1824 '	NaN	#VALUE!	1.39349e-07	5.67839e-06	0	5.45999e-07	0	#VALUE!
'MSMEG_1825 '	2.91e-06	-5.53611	1.54677e-05	1.68168e-05	3.01663e-05	0	#DIV/0!	5.53611
'MSMEG_1826 '	NaN	#VALUE!	0	2.184e-07	2.06618e-07	0	#DIV/0!	#VALUE!
'MSMEG_1827 '	0.170139	-0.769196	1.39349e-07	0	7.64487e-06	1.43052e-05	0.534413	0.769196
'MSMEG_1829 '	0.0177623	-1.7505	2.22958e-06	0	5.88862e-06	0	#DIV/0!	1.7505
'MSMEG_1830 '	0.246141	-0.608816	1.49103e-05	5.65655e-05	5.56836e-05	4.18235e-05	1.33139	0.608816
'MSMEG_1831 '	0.467692	-0.33004	3.59519e-05	2.59896e-05	5.99193e-06	9.93719e-06	0.60298	0.33004
'MSMEG_1832 '	0.35532	-0.449381	8.31911e-05	3.77832e-05	6.94237e-05	8.65955e-05	0.801701	0.449381
'MSMEG_1835 '	0.482915	-0.316129	4.18046e-06	1.13568e-05	7.02502e-06	1.10292e-05	0.636948	0.316129
'MSMEG_1836 '	NaN	#VALUE!	0	0	1.03309e-07	0	#DIV/0!	#VALUE!
'MSMEG_1837 '	0.243703	-0.613139	0.000195924	0.000217963	0.000222321	0.000175157	1.26927	0.613139
'MSMEG_1838 '	0.281774	-0.550099	0.000385438	0.000301828	0.000234202	0.000267212	0.876464	0.550099
'MSMEG_1839 '	0.0784067	-1.10565	0.000882773	0.000783946	0.000701159	0.000920009	0.762122	1.10565
'MSMEG_1840 '	0.0127335	-1.89505	3.17715e-05	2.28228e-05	1.31203e-05	3.18864e-05	0.411469	1.89505
'MSMEG_1841 '	NaN	#VALUE!	0	0	3.09927e-07	0	#DIV/0!	#VALUE!
'MSMEG_1842 '	0.553448	-0.256923	0.000133217	0.000108108	0.000106822	0.000119137	0.896628	0.256923
'MSMEG_1844 '	0.875823	-0.0575837	1.8394e-05	5.77667e-05	3.83277e-05	3.06852e-05	1.24906	0.0575837
'MSMEG_1845 '	1.19816e-07	-6.92149	3.20502e-05	4.52087e-05	1.98353e-05	9.46763e-05	0.209507	6.92149
'MSMEG_1846 '	0.490078	-0.309735	0.000268385	0.000172536	0.000190709	0.000163254	1.16817	0.309735
'MSMEG_1847 '	0.835588	-0.078008	8.82076e-05	4.09499e-05	3.00629e-05	2.98116e-05	1.00843	0.078008
'MSMEG_1848 '	0.813124	-0.0898434	0.000602543	0.000620474	0.000622437	0.000578213	1.07648	0.0898434
'MSMEG_1849 '	0.864627	-0.0631713	9.74046e-05	0.000110292	0.000106615	0.000106251	1.00342	0.0631713
'MSMEG_1850 '	0.594595	-0.225779	0.000154677	0.000124379	8.02712e-05	9.24923e-05	0.867869	0.225779
'MSMEG_1851 '	0.0197694	-1.70401	5.33705e-05	9.17279e-06	8.05811e-06	0	#DIV/0!	1.70401
'MSMEG_1852 '	0.0319258	-1.49586	0.000133775	0.000116735	0.000104136	0.000149822	0.695061	1.49586
'MSMEG_1853 '	0.0608849	-1.21549	0.00028455	0.000266229	0.000253314	0.000314168	0.806301	1.21549
'MSMEG_1854 '	0.512197	-0.290563	0.000151611	0.000142833	0.000189159	0.000167294	1.1307	0.290563
'MSMEG_1855 '	0.00252169	-2.59831	2.13203e-05	1.97652e-05	9.29782e-06	3.10128e-05	0.299806	2.59831
'MSMEG_1856 '	0.112362	-0.949379	9.33635e-05	5.80943e-05	5.69233e-05	7.94975e-05	0.716039	0.949379
'MSMEG_1857 '	0.82991	-0.0809687	0.000129315	0.000194157	0.000144219	0.000148621	0.970384	0.0809687
'MSMEG_1858 '	0.448977	-0.347776	2.00662e-05	1.90008e-05	4.50428e-05	3.63636e-05	1.23868	0.347776
'MSMEG_1859 '	0.287144	-0.541901	9.197e-06	5.26343e-05	4.60759e-05	3.29784e-05	1.39715	0.541901
'MSMEG_1860 '	0.000776733	-3.10973	1.75579e-05	2.184e-05	5.26876e-06	2.95932e-05	0.17804	3.10973
'MSMEG_1861 '	0.736946	-0.132564	8.48633e-05	7.88423e-05	0.000130686	0.000104504	1.25053	0.132564
'MSMEG_1862 '	0.727304	-0.138284	0.000532172	0.000396832	0.000414476	0.000387987	1.06827	0.138284
'MSMEG_1863 '	0.581289	-0.235608	0.000150357	0.00013377	0.000109921	0.000113568	0.967887	0.235608
'MSMEG_1864 '	0.000308535	-3.5107	3.06567e-06	1.49604e-05	2.56207e-05	4.04039e-06	6.34113	3.5107
'MSMEG_1865 '	0.975974	-0.0105618	0.000499704	0.000512038	0.000510244	0.000488669	1.04415	0.0105618
'MSMEG_1866 '	0.90538	-0.0431693	1.71399e-05	7.17443e-05	5.22744e-05	5.21975e-05	1.00147	0.0431693
'MSMEG_1867 '	0.238568	-0.622388	8.2773e-05	5.74391e-05	0.000103309	7.73135e-05	1.33624	0.622388
'MSMEG_1869 '	0.136759	-0.864045	0.000123602	8.09171e-05	5.67167e-05	8.18999e-05	0.692512	0.864045
'MSMEG_1870 '	0.128904	-0.889732	0.000536213	0.000592737	0.000544026	0.000676056	0.804705	0.889732
'MSMEG_1871 '	0.0607147	-1.21671	6.41003e-06	0	8.05811e-06	1.72536e-05	0.46704	1.21671
'MSMEG_1872 '	0.478164	-0.320423	5.76903e-05	4.58639e-05	5.52704e-05	6.45371e-05	0.856412	0.320423
'MSMEG_1873 '	0.000242958	-3.61447	2.1599e-05	6.66119e-06	8.05811e-06	3.55992e-05	0.226357	3.61447
'MSMEG_1876 '	NaN	#VALUE!	1.39349e-07	0	0	1.092e-07	0	#VALUE!
'MSMEG_1877 '	0.000291661	-3.53512	2.32712e-05	8.84519e-06	8.47134e-06	3.74556e-05	0.226171	3.53512
'MSMEG_1878 '	0.750435	-0.124687	0.00035297	0.000322576	0.000294844	0.0002552	1.15534	0.124687
'MSMEG_1879 '	0.996797	-0.00139343	2.1181e-05	9.93719e-05	5.71299e-05	5.05595e-05	1.12995	0.00139343
'MSMEG_1880 '	0.0122948	-1.91028	3.52552e-05	5.50367e-05	6.80807e-05	3.15588e-05	2.15727	1.91028
'MSMEG_1881 '	0.117108	-0.931413	2.13203e-05	3.7128e-06	1.05375e-05	4.36799e-06	2.41244	0.931413
'MSMEG_1882 '	0.0437681	-1.35884	0.000531197	0.000725087	0.000594337	0.000784273	0.757819	1.35884
'MSMEG_1883 '	0.767775	-0.114766	0.000270197	0.000273546	0.000367884	0.000360796	1.01964	0.114766
'MSMEG_1884 '	0.517085	-0.286438	0.000372339	0.00035348	0.00034278	0.000266666	1.28543	0.286438
'MSMEG_1886 '	0.230644	-0.637058	5.1559e-06	1.05924e-05	1.84923e-05	2.75184e-05	0.671999	0.637058
'MSMEG_1887 '	0.0726253	-1.13891	3.20502e-05	2.8392e-06	4.02905e-05	2.31504e-05	1.74038	1.13891
'MSMEG_1888 '	0.000100748	-3.99676	2.7591e-05	5.40539e-05	0.000104032	3.98579e-05	2.61008	3.99676
'MSMEG_1891 '	1.81341e-07	-6.7415	9.41996e-05	8.93255e-05	4.85553e-05	3.4944e-06	13.8952	6.7415
'MSMEG_1892 '	2.35691e-07	-6.62766	0.000113569	4.81571e-05	0.000131926	3.58176e-05	3.68327	6.62766
'MSMEG_1893 '	0.0197694	-1.70401	0	0	5.47538e-06	0	#DIV/0!	1.70401
'MSMEG_1894 '	0.25041	-0.601349	6.88382e-05	7.07615e-05	8.8226e-05	5.95139e-05	1.48244	0.601349
'MSMEG_1895 '	0.954394	-0.0202725	0.000414004	0.000274419	0.000406625	0.000382309	1.0636	0.0202725
'MSMEG_1896 '	0.826729	-0.0826369	5.5182e-05	1.82364e-05	1.36368e-05	1.16844e-05	1.1671	0.0826369
'MSMEG_1897 '	2.81233e-05	-4.55093	6.41003e-05	6.38819e-05	7.26263e-05	2.03112e-05	3.57568	4.55093
'MSMEG_1898 '	0.0101568	-1.99324	6.77234e-05	7.16351e-05	5.27909e-05	9.84983e-05	0.535958	1.99324
'MSMEG_1899 '	5.57178e-08	-7.25401	2.68943e-05	1.68168e-05	0	3.77832e-05	0	7.25401
'MSMEG_1900 '	0.00186792	-2.72864	7.92893e-05	4.30247e-05	2.45876e-05	5.62379e-05	0.437206	2.72864
'MSMEG_1901 '	0.00548429	-2.26088	0.000179063	0.000174392	0.000245359	0.000140322	1.74855	2.26088
'MSMEG_1902 '	0.158275	-0.800589	0.000121512	0.000127109	0.000147732	0.000108981	1.35557	0.800589
'MSMEG_1903 '	7.32297e-05	-4.13531	0.000116495	0.000104613	6.43616e-05	1.57248e-05	4.093	4.13531
'MSMEG_1904 '	0.265131	-0.576539	0.00010702	8.76875e-05	0.000120458	9.34751e-05	1.28867	0.576539
'MSMEG_1905 '	0.512657	-0.290173	5.89444e-05	3.1668e-05	0.000102689	7.90607e-05	1.29887	0.290173
'MSMEG_1906 '	0.532373	-0.273784	0.000197736	0.00027977	0.00031034	0.000251924	1.23188	0.273784
'MSMEG_1907 '	0.64023	-0.193664	0.000304616	0.000288506	0.000295877	0.000283483	1.04372	0.193664
'MSMEG_1908 '	0.0881909	-1.05458	0.000180038	0.000185203	0.000220358	0.000152661	1.44344	1.05458
'MSMEG_1909 '	0.0114896	-1.9397	5.44853e-05	3.48348e-05	4.96917e-05	2.11848e-05	2.34563	1.9397
'MSMEG_1910 '	0.0946632	-1.02382	0.0001583	0.000107671	7.54156e-05	0.000105705	0.713451	1.02382
'MSMEG_1911 '	0.93598	-0.0287337	0.000338896	0.000310892	0.000253727	0.000246355	1.02993	0.0287337
'MSMEG_1912 '	0.257103	-0.589893	1.49103e-05	4.42259e-05	5.35141e-05	3.7128e-05	1.44134	0.589893
'MSMEG_1913 '	0.626852	-0.202835	8.63961e-05	8.80151e-05	8.49201e-05	9.09635e-05	0.933562	0.202835
'MSMEG_1914 '	0.00521616	-2.28265	0.000287197	0.000262844	0.000232445	0.000369314	0.629398	2.28265
'MSMEG_1915 '	NaN	#VALUE!	1.18446e-05	8.95439e-06	0	4.36799e-06	0	#VALUE!
'MSMEG_1916 '	0.00151277	-2.82023	2.89845e-05	9.71879e-06	5.07248e-05	1.73628e-05	2.92147	2.82023
'MSMEG_1920 '	0.00780402	-2.10768	0.000125414	0.000190554	0.000242466	0.000139885	1.73333	2.10768
'MSMEG_1921 '	0.0842118	-1.07463	0.000108831	0.000145782	8.88458e-05	0.000126563	0.701991	1.07463
'MSMEG_1924 '	7.87263e-05	-4.10388	5.30918e-05	5.24159e-05	9.62841e-05	2.99208e-05	3.21797	4.10388
'MSMEG_1925 '	NaN	#VALUE!	0	1.092e-07	1.03309e-07	0	#DIV/0!	#VALUE!
'MSMEG_1926 '	0.128239	-0.891979	2.59188e-05	1.51788e-05	3.05795e-05	4.37891e-05	0.698335	0.891979
'MSMEG_1927 '	0.0831854	-1.07995	0.000162341	0.00022659	0.000160749	0.000109418	1.46912	1.07995
'MSMEG_1928 '	0.49303	-0.307127	1.74186e-05	2.36964e-05	3.33688e-05	3.7674e-05	0.885727	0.307127
'MSMEG_1929 '	0.966816	-0.0146564	3.48371e-06	5.24159e-06	6.30185e-06	7.20719e-06	0.874384	0.0146564
'MSMEG_1930 '	0.0398184	-1.39992	9.05765e-06	7.09799e-06	1.16739e-05	2.6208e-06	4.45434	1.39992
'MSMEG_1931 '	0.599157	-0.22246	2.80091e-05	2.11848e-05	1.47732e-05	1.46328e-05	1.0096	0.22246
'MSMEG_1932 '	0.114127	-0.942613	0.000234802	0.000214032	0.000286269	0.000206279	1.38778	0.942613
'MSMEG_1934 '	0.00257923	-2.58851	4.47309e-05	3.95303e-05	6.3845e-05	2.53344e-05	2.5201	2.58851
'MSMEG_1935 '	0.0308645	-1.51054	8.45846e-05	0.000104613	5.32042e-05	8.47391e-05	0.627859	1.51054
'MSMEG_1936 '	0.0187751	-1.72642	0.00025459	0.000194267	0.000292158	0.000194703	1.50053	1.72642
'MSMEG_1937 '	0.570168	-0.243997	4.83539e-05	4.95767e-05	3.15093e-05	3.07944e-05	1.02322	0.243997
'MSMEG_1938 '	0.0942641	-1.02565	9.37816e-05	0.000116298	0.000131719	0.000177668	0.741377	1.02565
'MSMEG_1939 '	1.02647e-06	-5.98866	3.59519e-05	2.0202e-05	0	3.62544e-05	0	5.98866
'MSMEG_1940 '	NaN	#VALUE!	1.96481e-05	0	0	4.58639e-06	0	#VALUE!
'MSMEG_1941 '	0.129117	-0.889018	1.78366e-05	6.11519e-06	2.22115e-05	1.43052e-05	1.55269	0.889018
'MSMEG_1942 '	0.0556926	-1.2542	5.95018e-05	0.000102539	8.94657e-05	5.82035e-05	1.53712	1.2542
'MSMEG_1943 '	NaN	#VALUE!	1.53283e-06	6.66119e-06	1.1364e-06	6.55199e-07	1.73443	#VALUE!
'MSMEG_1944 '	0.923735	-0.0344525	0.000170841	0.000120557	0.000161989	0.000153644	1.05431	0.0344525
'MSMEG_1945 '	NaN	#VALUE!	1.11479e-06	0	1.03309e-07	0	#DIV/0!	#VALUE!
'MSMEG_1946 '	0.864754	-0.0631073	0.000114266	0.000209336	0.000174282	0.00016238	1.0733	0.0631073
'MSMEG_1947 '	0.0721878	-1.14154	0.000265738	0.000215342	0.000179551	0.000242314	0.740984	1.14154
'MSMEG_1948 '	0.00524197	-2.28051	6.82808e-06	1.29948e-05	8.98789e-06	0	#DIV/0!	2.28051
'MSMEG_1949 '	NaN	#VALUE!	1.57464e-05	5.78759e-06	4.85553e-06	0	#DIV/0!	#VALUE!
'MSMEG_1950 '	0.0326281	-1.48641	3.48371e-05	2.31504e-05	6.12623e-05	3.28692e-05	1.86382	1.48641
'MSMEG_1951 '	0.632949	-0.198632	3.44191e-05	3.19956e-05	6.66344e-05	5.82035e-05	1.14485	0.198632
'MSMEG_1952 '	0.0431723	-1.36479	3.6788e-05	3.28692e-05	4.15303e-05	1.8018e-05	2.30493	1.36479
'MSMEG_1953 '	NaN	#VALUE!	0	3.4944e-06	0	4.04039e-06	0	#VALUE!
'MSMEG_1954 '	0.179604	-0.745685	9.50357e-05	0.000139776	0.000134405	9.81707e-05	1.3691	0.745685
'MSMEG_1955 '	1.25649e-05	-4.90084	5.12803e-05	5.68931e-05	0.000114673	3.50532e-05	3.27141	4.90084
'MSMEG_1956 '	0.917197	-0.0375375	7.16251e-05	3.89843e-05	4.07038e-05	3.70188e-05	1.09954	0.0375375
'MSMEG_1958 '	0.323232	-0.490485	1.60251e-05	8.28827e-05	4.32865e-05	6.12611e-05	0.70659	0.490485
'MSMEG_1959 '	0.46681	-0.33086	1.5607e-05	1.4742e-05	1.39467e-05	9.06359e-06	1.53876	0.33086
'MSMEG_1960 '	0.341042	-0.467192	1.35168e-05	1.28856e-05	2.2728e-06	5.89679e-06	0.38543	0.467192
'MSMEG_1961 '	0.360531	-0.443058	0.000279672	0.000330111	0.000308481	0.000362871	0.850112	0.443058
'MSMEG_1962 '	2.02437e-06	-5.69371	5.95018e-05	3.549e-05	2.89265e-06	3.86568e-05	0.0748292	5.69371
'MSMEG_1963 '	0.276282	-0.558648	0.000246786	0.000295713	0.000272116	0.00031799	0.855738	0.558648
'MSMEG_1964 '	0.032275	-1.49113	0.000108831	4.87031e-05	9.78337e-05	0.000143598	0.681304	1.49113
'MSMEG_1966 '	0.0110018	-1.95854	7.13464e-05	0.000148839	0.000141947	7.97159e-05	1.78066	1.95854
'MSMEG_1967 '	0.0101476	-1.99364	0.000176833	0.000113459	0.000169117	9.56591e-05	1.76791	1.99364
'MSMEG_1968 '	0.631061	-0.199929	0.000215015	0.00023467	0.000246805	0.000225607	1.09396	0.199929
'MSMEG_1969 '	0.388825	-0.410246	0.000133635	0.000151351	0.000105789	0.00011739	0.901172	0.410246
'MSMEG_1970 '	0.0300615	-1.52199	0.000142414	0.000160633	0.000123144	0.000179961	0.684283	1.52199
'MSMEG_1971 '	0.413555	-0.383467	0.000341404	0.000344089	0.000303935	0.000332841	0.913154	0.383467
'MSMEG_1972 '	0.466238	-0.331392	0.000253057	0.000303466	0.000266331	0.000226371	1.17652	0.331392
'MSMEG_1973 '	0.932347	-0.0304224	0.000237868	0.00016926	0.000160336	0.000157575	1.01752	0.0304224
'MSMEG_1974 '	0.884725	-0.0531918	9.197e-06	2.08572e-05	1.14673e-05	1.00464e-05	1.14144	0.0531918
'MSMEG_1975 '	0.824124	-0.0840074	0.000438251	0.000312858	0.000289885	0.000292328	0.991644	0.0840074
'MSMEG_1976 '	0.26733	-0.572953	9.197e-05	8.28827e-05	0.000108991	0.000133224	0.818105	0.572953
'MSMEG_1977 '	0.469331	-0.328521	0.000124578	0.000107999	9.61808e-05	7.97159e-05	1.20654	0.328521
'MSMEG_1978 '	8.72764e-05	-4.0591	5.57394e-05	5.53643e-05	0.000110024	4.05131e-05	2.71576	4.0591
'MSMEG_1979 '	0.0993299	-1.00292	9.7544e-06	4.04039e-06	1.88023e-05	8.51759e-06	2.20746	1.00292
'MSMEG_1980 '	0.849766	-0.0707004	0.000375544	0.000363526	0.000308997	0.000288069	1.07265	0.0707004
'MSMEG_1981 '	5.33322e-05	-4.27301	3.16321e-05	6.20255e-05	8.09943e-05	2.39148e-05	3.38679	4.27301
'MSMEG_1982 '	0.145126	-0.838254	0.000102282	0.000150696	8.68829e-05	0.000115097	0.754869	0.838254
'MSMEG_1983 '	0.0882974	-1.05405	0.000110643	7.56755e-05	7.31428e-05	4.89215e-05	1.4951	1.05405
'MSMEG_1984 '	0.613895	-0.211906	0.00015621	0.000102539	0.000160336	0.000154845	1.03546	0.211906
'MSMEG_1985 '	0.0324447	-1.48886	5.85264e-05	3.07944e-05	2.32445e-05	4.23695e-05	0.548614	1.48886
'MSMEG_1986 '	0.00102215	-2.99048	0.000142693	0.00017876	0.00022542	0.000112585	2.00222	2.99048
'MSMEG_1987 '	0.0506348	-1.29555	0.000172095	0.000109418	0.000118702	0.000172754	0.687116	1.29555
'MSMEG_1988 '	0.0243847	-1.61288	1.5189e-05	2.21676e-05	0	6.87959e-06	0	1.61288
'MSMEG_1989 '	0.0448147	-1.34858	0.000127225	0.00016511	0.000120562	7.43651e-05	1.62121	1.34858
'MSMEG_1990 '	0.804359	-0.0945501	0.000110782	0.000157139	0.000194738	0.000192629	1.01095	0.0945501
'MSMEG_1991 '	0.735626	-0.133343	0.000167358	0.000159213	0.000202589	0.000185967	1.08938	0.133343
'MSMEG_1992 '	0.00591978	-2.22769	4.38948e-05	4.99043e-05	5.23777e-05	2.08572e-05	2.51126	2.22769
'MSMEG_1993 '	0.0561233	-1.25086	6.10347e-05	0.000115424	0.00012769	7.91699e-05	1.61286	1.25086
'MSMEG_1995 '	0.836454	-0.0775577	5.74116e-05	4.71743e-05	4.35964e-05	4.34615e-05	1.0031	0.0775577
'MSMEG_1996 '	0.111529	-0.952612	0.00016248	0.000111165	0.00012583	0.000168495	0.746789	0.952612
'MSMEG_1997 '	0.0571054	-1.24332	7.3576e-05	0.000101337	0.000120872	8.37563e-05	1.44313	1.24332
'MSMEG_1998 '	0.519354	-0.284536	0.00013266	0.000126126	0.00012862	0.00010778	1.19335	0.284536
'MSMEG_2000 '	0.625083	-0.204062	0.000134332	0.000202238	0.000187816	0.000164564	1.14129	0.204062
'MSMEG_2001 '	0.677993	-0.168775	0.000102282	9.58775e-05	0.00014267	0.000129293	1.10346	0.168775
'MSMEG_2002 '	0.846152	-0.0725519	0.00032301	0.000316789	0.000327283	0.000309145	1.05867	0.0725519
'MSMEG_2003 '	0.807717	-0.0927408	0.000360216	0.000379579	0.000371293	0.000361233	1.02785	0.0927408
'MSMEG_2004 '	0.363428	-0.439582	0.000194252	0.000168605	0.000157856	0.000123723	1.27588	0.439582
'MSMEG_2005 '	0.153676	-0.813393	4.278e-05	7.03247e-05	3.63648e-05	5.13239e-05	0.708535	0.813393
'MSMEG_2006 '	0.00189264	-2.72293	9.78227e-05	7.63307e-05	0.00012893	6.46463e-05	1.99439	2.72293
'MSMEG_2007 '	0.89372	-0.0487986	5.42066e-05	0.000118263	9.61808e-05	9.05267e-05	1.06246	0.0487986
'MSMEG_2008 '	NaN	#VALUE!	9.61505e-06	0	1.03309e-07	0	#DIV/0!	#VALUE!
'MSMEG_2009 '	0.00422159	-2.37452	4.41735e-05	2.77368e-05	5.04148e-05	1.53972e-05	3.27429	2.37452
'MSMEG_2010 '	0.010433	-1.98159	5.30918e-05	3.97487e-05	9.60774e-06	2.81736e-05	0.34102	1.98159
'MSMEG_2011 '	0.550751	-0.259044	7.10677e-05	7.28363e-05	7.29362e-05	8.31011e-05	0.877681	0.259044
'MSMEG_2012 '	0.588405	-0.230323	0.000138094	0.000247665	0.000235545	0.000256292	0.919048	0.230323
'MSMEG_2013 '	0.18446	-0.734097	3.46978e-05	3.822e-06	6.50847e-06	1.24488e-05	0.52282	0.734097
'MSMEG_2014 '	7.55972e-05	-4.12149	1.86727e-05	2.91564e-05	3.6778e-05	5.78759e-06	6.35463	4.12149
'MSMEG_2015 '	0.94064	-0.0265765	0.000123881	8.63771e-05	7.31428e-05	7.39283e-05	0.989375	0.0265765
'MSMEG_2016 '	0.000509737	-3.29265	1.70005e-05	4.76111e-05	5.36174e-05	1.5834e-05	3.38622	3.29265
'MSMEG_2018 '	0.170661	-0.767866	5.82477e-05	2.26044e-05	7.91348e-05	5.62379e-05	1.40714	0.767866
'MSMEG_2019 '	0.0988953	-1.00482	0	1.0374e-05	1.14673e-05	3.6036e-06	3.18219	1.00482
'MSMEG_2020 '	0.00227692	-2.64265	4.94687e-05	2.81736e-05	4.07038e-05	1.28856e-05	3.15886	2.64265
'MSMEG_2021 '	0.642978	-0.191804	0.000477826	0.000493147	0.000372119	0.000402729	0.923994	0.191804
'MSMEG_2022 '	0.09357	-1.02886	4.22226e-05	5.28527e-05	3.03729e-05	1.49604e-05	2.03022	1.02886
'MSMEG_2023 '	0.051344	-1.28951	0.000173489	5.25251e-05	8.09943e-05	0.000122959	0.65871	1.28951
'MSMEG_2025 '	0.0175152	-1.75659	3.42797e-05	1.8564e-05	1.14673e-05	2.64264e-05	0.433934	1.75659
'MSMEG_2026 '	0.526442	-0.278649	3.97143e-05	4.89215e-05	6.01259e-05	5.20883e-05	1.15431	0.278649
'MSMEG_2027 '	0.140839	-0.851277	7.83139e-05	0.000125034	0.000104652	7.36007e-05	1.42189	0.851277
'MSMEG_2028 '	0.907578	-0.0421159	0.000113569	7.97159e-05	6.53946e-05	6.50831e-05	1.00479	0.0421159
'MSMEG_2029 '	0.000716117	-3.14502	6.96743e-06	1.092e-05	4.88652e-05	1.68168e-05	2.90574	3.14502
'MSMEG_2030 '	0.00125368	-2.90181	1.60251e-05	3.31968e-05	2.42776e-05	2.9484e-06	8.23418	2.90181
'MSMEG_2032 '	0.197315	-0.704839	0.000155652	0.000100573	0.000110954	8.14631e-05	1.36201	0.704839
'MSMEG_2033 '	0.234752	-0.62939	6.20101e-05	5.97323e-05	6.40516e-05	8.26643e-05	0.77484	0.62939
'MSMEG_2034 '	0.46029	-0.336969	4.22226e-05	3.07944e-05	2.08684e-05	2.46792e-05	0.845589	0.336969
'MSMEG_2035 '	0.0257398	-1.5894	6.01986e-05	8.04803e-05	0.000102793	6.04967e-05	1.69914	1.5894
'MSMEG_2036 '	0.0169647	-1.77045	2.10416e-05	3.18864e-05	6.17788e-05	2.73e-05	2.26296	1.77045
'MSMEG_2037 '	0.0547317	-1.26176	0.000189096	0.000153426	0.00015672	0.000222222	0.705241	1.26176
'MSMEG_2038 '	0.0389002	-1.41005	0.000322731	0.000274528	0.00025569	0.000343543	0.744274	1.41005
'MSMEG_2039 '	0.18446	-0.734097	1.18446e-05	1.638e-05	7.33494e-06	1.1466e-05	0.639713	0.734097
'MSMEG_2040 '	0.215743	-0.666063	6.82808e-06	6.55199e-07	1.37401e-05	5.45999e-06	2.51651	0.666063
'MSMEG_2041 '	0.000168299	-3.77392	2.14597e-05	6.54107e-05	1.65295e-05	5.51459e-05	0.29974	3.77392
'MSMEG_2042 '	0.210594	-0.676554	4.48702e-05	3.822e-05	6.00226e-05	4.13867e-05	1.45028	0.676554
'MSMEG_2043 '	0.0070399	-2.15243	6.96743e-06	1.2012e-06	1.10541e-05	1.4196e-06	7.78676	2.15243
'MSMEG_2044 '	0.0025563	-2.59239	0.000304477	0.000186077	0.000290092	0.000147747	1.96343	2.59239
'MSMEG_2045 '	0.688464	-0.162119	0.000286083	0.000323341	0.000309824	0.0003193	0.970321	0.162119
'MSMEG_2046 '	0.0110174	-1.95792	3.9993e-05	4.88123e-05	3.94641e-05	7.33823e-05	0.537787	1.95792
'MSMEG_2047 '	0.782745	-0.10638	3.10747e-05	3.17772e-05	4.52494e-05	4.96859e-05	0.910708	0.10638
'MSMEG_2049 '	0.430091	-0.366439	9.05765e-05	0.000129948	0.000132752	0.000104941	1.26502	0.366439
'MSMEG_2050 '	0.0876891	-1.05705	0.000110364	0.000119574	0.000111884	0.000152443	0.733938	1.05705
'MSMEG_2051 '	0.301092	-0.521301	0.000103397	5.12147e-05	0.000167464	0.000195577	0.856256	0.521301
'MSMEG_2052 '	0.953162	-0.0208331	0.000114684	9.29291e-05	8.03745e-05	7.67675e-05	1.04699	0.0208331
'MSMEG_2053 '	0.104697	-0.980067	5.85264e-06	7.20719e-06	4.64891e-06	1.02648e-05	0.452899	0.980067
'MSMEG_2054 '	0.910837	-0.0405593	6.4379e-05	7.39283e-05	4.70056e-05	4.33523e-05	1.08427	0.0405593
'MSMEG_2055 '	0.0553554	-1.25684	8.5978e-05	0.000130931	6.83906e-05	4.17143e-05	1.6395	1.25684
'MSMEG_2056 '	0.100069	-0.9997	6.3961e-05	5.70023e-05	0.000113743	7.64399e-05	1.48801	0.9997
'MSMEG_2057 '	5.86461e-07	-6.23176	2.99599e-05	4.07315e-05	7.5209e-05	1.43052e-05	5.25747	6.23176
'MSMEG_2058 '	0.728326	-0.137674	9.85194e-05	0.000142287	0.000202073	0.000172317	1.17268	0.137674
'MSMEG_2059 '	0.331256	-0.479836	7.58056e-05	4.94675e-05	8.89491e-05	6.97787e-05	1.27473	0.479836
'MSMEG_2060 '	0.666711	-0.176062	0.000208744	0.000265356	0.000228106	0.000237619	0.959968	0.176062
'MSMEG_2061 '	0.635256	-0.197051	0.000123463	5.79851e-05	0.000101036	0.000100682	1.00352	0.197051
'MSMEG_2062 '	0.847709	-0.0717533	0.000165128	0.000110729	0.000104859	0.000100682	1.04148	0.0717533
'MSMEG_2063 '	0.000379732	-3.42052	0.000121094	0.000216543	9.24616e-05	0.000171881	0.537941	3.42052
'MSMEG_2064 '	0.0177623	-1.7505	2.84271e-05	2.90472e-05	0	7.64399e-06	0	1.7505
'MSMEG_2065 '	NaN	#VALUE!	4.3198e-06	0	0	2.4024e-06	0	#VALUE!
'MSMEG_2066 '	0.234177	-0.630455	2.78697e-06	2.64264e-05	8.47134e-06	1.5834e-05	0.53501	0.630455
'MSMEG_2067 '	0.00231833	-2.63483	1.93694e-05	4.61915e-05	8.37837e-05	3.6036e-05	2.325	2.63483
'MSMEG_2068 '	0.00654914	-2.18382	4.08291e-05	7.14167e-05	3.09927e-05	6.02783e-05	0.51416	2.18382
'MSMEG_2069 '	0.000158245	-3.80067	3.06567e-05	2.77368e-05	1.03309e-05	4.11683e-05	0.250943	3.80067
'MSMEG_2070 '	0.00067881	-3.16825	0.000102979	0.000140322	2.87199e-05	7.44743e-05	0.385635	3.16825
'MSMEG_2071 '	0.000108873	-3.96308	1.97875e-05	1.53972e-05	0	1.81272e-05	0	3.96308
'MSMEG_2072 '	0.122339	-0.912434	0.000102142	5.05595e-05	4.15303e-05	6.16979e-05	0.673122	0.912434
'MSMEG_2073 '	0.618874	-0.208398	1.01724e-05	3.549e-05	2.39677e-05	1.81272e-05	1.3222	0.208398
'MSMEG_2074 '	0.275684	-0.559588	8.38878e-05	6.11519e-05	8.36804e-05	0.000106797	0.783543	0.559588
'MSMEG_2075 '	0.292787	-0.533448	0.000182268	0.00016653	0.000244946	0.000288397	0.849336	0.533448
'MSMEG_2076 '	0.212316	-0.673017	1.25414e-05	0.000123614	2.62405e-05	1.5834e-05	1.65723	0.673017
'MSMEG_2077 '	0.0117258	-1.93086	0.000242745	0.000235216	0.00016891	0.000260223	0.649098	1.93086
'MSMEG_2078 '	0.866505	-0.0622292	0.000295001	0.000355882	0.000346292	0.000304668	1.13662	0.0622292
'MSMEG_2079 '	1.7291e-08	-7.76218	6.92562e-05	7.13075e-05	1.04342e-05	7.42559e-05	0.140517	7.76218
'MSMEG_2080 '	0.155396	-0.80856	0.000143808	6.75947e-05	0.000122421	9.04175e-05	1.35396	0.80856
'MSMEG_2081 '	0.13901	-0.856953	0.000194809	0.000176467	0.000194221	0.000249849	0.777353	0.856953
'MSMEG_2082 '	0.117108	-0.931413	8.22156e-06	2.6208e-05	4.5456e-06	1.11384e-05	0.408102	0.931413
'MSMEG_2084 '	9.83345e-06	-5.00729	2.32712e-05	6.18071e-05	1.44633e-05	6.24623e-05	0.231552	5.00729
'MSMEG_2085 '	0.402357	-0.395388	0.000120815	0.000235326	0.000209614	0.000234452	0.89406	0.395388
'MSMEG_2086 '	NaN	#VALUE!	0	0	1.03309e-07	0	#DIV/0!	#VALUE!
'MSMEG_2087 '	9.22534e-05	-4.03502	0.000178366	0.000172863	7.97546e-05	0.000177013	0.450558	4.03502
'MSMEG_2088 '	4.20229e-05	-4.37651	6.29855e-05	0.000122085	0.000115396	4.10591e-05	2.81049	4.37651
'MSMEG_2089 '	NaN	#VALUE!	0	0	4.13236e-07	0	#DIV/0!	#VALUE!
'MSMEG_2090 '	2.48323e-09	-8.60498	4.66818e-05	2.0202e-05	5.682e-05	1.4196e-06	40.0254	8.60498
'MSMEG_2092 '	0.811593	-0.0906615	0.000117192	0.000118154	0.000125004	0.000126999	0.984288	0.0906615
'MSMEG_2094 '	0.838702	-0.0763923	0.000405365	0.000422385	0.000351974	0.000338956	1.03841	0.0763923
'MSMEG_2095 '	0.753339	-0.123009	0.000409267	0.000380125	0.000339474	0.000336336	1.00933	0.123009
'MSMEG_2096 '	0.0127229	-1.89541	0.000205539	0.000241768	0.000135542	0.000205514	0.659524	1.89541
'MSMEG_2097 '	2.56476e-09	-8.59095	0.000177948	0.00021698	8.37837e-05	0.000286977	0.291952	8.59095
'MSMEG_2098 '	0.0340374	-1.46804	0.000100192	0.000120666	6.93204e-05	0.000105269	0.658509	1.46804
'MSMEG_2099 '	0.114306	-0.941933	0.000112176	0.000106579	0.00014112	0.000173737	0.812264	0.941933
'MSMEG_2100 '	0.000534888	-3.27174	0.000568821	0.000434179	0.000350011	0.00059088	0.592355	3.27174
'MSMEG_2101 '	0.552283	-0.257838	6.88382e-05	8.70323e-05	5.53737e-05	4.91399e-05	1.12686	0.257838
'MSMEG_2102 '	0.00394094	-2.4044	5.01655e-05	7.17443e-05	2.03519e-05	4.79387e-05	0.42454	2.4044
'MSMEG_2103 '	0.603184	-0.21955	4.43128e-05	4.36799e-05	3.65714e-05	4.26971e-05	0.856531	0.21955
'MSMEG_2104 '	0.399489	-0.398496	0.000190071	0.000132896	0.000187093	0.000210756	0.887723	0.398496
'MSMEG_2105 '	0.988832	-0.00487743	4.51489e-05	2.42424e-05	9.10153e-05	8.83427e-05	1.03025	0.00487743
'MSMEG_2106 '	0.157176	-0.803615	4.22226e-05	5.71115e-05	3.00629e-05	1.55064e-05	1.93875	0.803615
'MSMEG_2107 '	0.342827	-0.464925	0.000294583	0.000278132	0.000280174	0.00032476	0.862711	0.464925
'MSMEG_2108 '	0.152351	-0.817156	0.000131963	5.61287e-05	5.85763e-05	7.74227e-05	0.756577	0.817156
'MSMEG_2109 '	0.920884	-0.035795	0.000140185	0.000120557	0.000120768	0.000112803	1.07061	0.035795
'MSMEG_2110 '	0.0470091	-1.32782	0.0001498	0.000104177	0.000116016	6.68303e-05	1.73598	1.32782
'MSMEG_2111 '	0.000142954	-3.8448	1.93694e-05	3.06852e-05	1.03309e-07	1.98744e-05	0.0051981	3.8448
'MSMEG_2112 '	0.0359617	-1.44416	0.000147431	0.000154299	0.000107235	6.41003e-05	1.67292	1.44416
'MSMEG_2114 '	0.000780497	-3.10763	1.44922e-05	2.184e-06	3.92575e-06	2.15124e-05	0.182488	3.10763
'MSMEG_2115 '	0.933997	-0.0296547	5.85264e-06	4.25879e-06	2.55173e-05	2.41332e-05	1.05736	0.0296547
'MSMEG_2116 '	0.080965	-1.0917	0.000160808	0.000169587	0.000113433	0.000149713	0.757672	1.0917
'MSMEG_2117 '	0.702106	-0.153598	4.40341e-05	4.18235e-05	6.62211e-05	5.50367e-05	1.20322	0.153598
'MSMEG_2118 '	3.41655e-05	-4.46641	2.57795e-05	1.94376e-05	5.72332e-05	1.34316e-05	4.26109	4.46641
'MSMEG_2119 '	1.1625e-06	-5.93461	5.35098e-05	2.48976e-05	8.97756e-05	1.86732e-05	4.80773	5.93461
'MSMEG_2120 '	0.309862	-0.508832	8.93224e-05	8.09171e-05	9.73172e-05	0.000116625	0.834442	0.508832
'MSMEG_2121 '	0.352787	-0.452487	3.90176e-05	3.39612e-05	8.44035e-05	6.36635e-05	1.32578	0.452487
'MSMEG_2122 '	0.000153758	-3.81316	9.7544e-07	1.72536e-05	5.57869e-06	3.4398e-05	0.162181	3.81316
'MSMEG_2123 '	0.0590047	-1.22911	8.77896e-05	1.99836e-05	8.78127e-06	2.2932e-05	0.382927	1.22911
'MSMEG_2124 '	0.173396	-0.760961	0.000145759	0.000142069	0.000208271	0.000154736	1.34598	0.760961
'MSMEG_2125 '	0.87346	-0.0587568	3.44191e-05	2.79552e-05	2.65504e-05	2.43516e-05	1.0903	0.0587568
'MSMEG_2126 '	0.487435	-0.312083	2.02055e-05	3.89843e-05	2.87199e-05	2.2386e-05	1.28294	0.312083
'MSMEG_2127 '	0.0414846	-1.38211	8.17976e-05	0.000104177	8.02712e-05	4.09499e-05	1.96023	1.38211
'MSMEG_2128 '	0.00416087	-2.38082	4.79359e-05	7.03247e-05	0.000105065	5.14331e-05	2.04276	2.38082
'MSMEG_2130 '	0.575538	-0.239926	5.68542e-05	4.99043e-05	4.33898e-05	4.83755e-05	0.896937	0.239926
'MSMEG_2131 '	0.0219718	-1.65813	2.64762e-05	2.86104e-05	1.03309e-07	6.33359e-06	0.0163113	1.65813
'MSMEG_2133 '	0.678019	-0.168758	0.000232712	0.000231176	0.000207651	0.000206715	1.00453	0.168758
'MSMEG_2134 '	0.000341023	-3.46722	3.92963e-05	5.06687e-05	8.26473e-07	1.50696e-05	0.0548438	3.46722
'MSMEG_2135 '	0.468141	-0.329623	5.62968e-05	0.000100027	4.57659e-05	5.70023e-05	0.802878	0.329623
'MSMEG_2136 '	0.0480226	-1.31855	0.00036147	0.000334042	0.000304245	0.000197106	1.54356	1.31855
'MSMEG_2137 '	0.0118664	-1.92568	0.000135725	0.000188479	0.000117772	0.00018149	0.648919	1.92568
'MSMEG_2139 '	0.319233	-0.495892	8.26337e-05	6.34451e-05	4.51461e-05	5.87495e-05	0.76845	0.495892
'MSMEG_2140 '	0.206288	-0.685525	0.000317993	0.000383728	0.000398566	0.000325525	1.22438	0.685525
'MSMEG_2141 '	0.00355826	-2.44876	8.61174e-05	0.000168168	4.22534e-05	8.83427e-05	0.47829	2.44876
'MSMEG_2142 '	0.281899	-0.549907	0.000163874	0.000292874	0.000247942	0.000187933	1.31931	0.549907
'MSMEG_2143 '	0.823483	-0.0843452	0.000134053	4.75019e-05	9.57675e-05	0.000100245	0.95533	0.0843452
'MSMEG_2144 '	0.718646	-0.143485	0.000312837	0.000237619	0.000239367	0.000246464	0.971205	0.143485
'MSMEG_2145 '	0.361218	-0.44223	5.96412e-05	3.21048e-05	5.79564e-05	6.97787e-05	0.830574	0.44223
'MSMEG_2146 '	0.159479	-0.797297	0.000353667	0.000438328	0.000350838	0.000283155	1.23903	0.797297
'MSMEG_2147 '	0.0149012	-1.82678	0.000135307	0.000127982	0.000120045	6.70487e-05	1.79042	1.82678
'MSMEG_2148 '	0.00867423	-2.06177	0.000277443	0.00034114	0.000291332	0.000170461	1.70908	2.06177
'MSMEG_2149 '	0.103336	-0.985746	9.30848e-05	0.000100464	6.3845e-05	9.11819e-05	0.700194	0.985746
'MSMEG_2150 '	0.0134141	-1.87244	2.64762e-05	3.3852e-05	5.92994e-05	2.77368e-05	2.13794	1.87244
'MSMEG_2151 '	0.717428	-0.144221	0.000129873	0.000194485	0.000146286	0.000143707	1.01794	0.144221
'MSMEG_2152 '	0.791241	-0.101691	0.000187563	0.000233578	0.000253314	0.000242642	1.04398	0.101691
'MSMEG_2153 '	NaN	#VALUE!	0	0	1.03309e-07	0	#DIV/0!	#VALUE!
'MSMEG_2154 '	4.05556e-05	-4.39195	0.000167915	0.000104286	0.000125934	4.54271e-05	2.77221	4.39195
'MSMEG_2155 '	0.0137716	-1.86102	0.000101864	0.000117281	0.000163848	9.28199e-05	1.76523	1.86102
'MSMEG_2156 '	0.0269459	-1.56951	6.27068e-05	6.70487e-05	7.73785e-05	0.000118482	0.653083	1.56951
'MSMEG_2157 '	0.620767	-0.207072	0.000212367	0.000129183	0.000141533	0.000120447	1.17506	0.207072
'MSMEG_2159 '	0.0605918	-1.21759	8.70928e-05	3.96395e-05	9.80403e-05	6.20255e-05	1.58064	1.21759
'MSMEG_2161 '	0.614798	-0.211268	0.00110949	0.00110445	0.0010114	0.000897295	1.12716	0.211268
'MSMEG_2162 '	0.20942	-0.678982	8.52813e-05	9.56591e-05	5.59935e-05	7.61123e-05	0.73567	0.678982
'MSMEG_2163 '	0.901341	-0.0451107	0.000205678	0.000222113	0.000225007	0.000229975	0.978399	0.0451107
'MSMEG_2164 '	1.64006e-07	-6.78514	6.27068e-06	2.27136e-05	0	3.3852e-05	0	6.78514
'MSMEG_2165 '	0.0010278	-2.98809	9.4339e-05	0.000102539	8.39903e-05	3.28692e-05	2.55529	2.98809
'MSMEG_2166 '	0.000449251	-3.34751	9.00191e-05	4.95767e-05	2.46909e-05	6.55199e-05	0.376845	3.34751
'MSMEG_2167 '	0.467712	-0.330022	7.9568e-05	9.70787e-05	0.000108165	0.000120666	0.896398	0.330022
'MSMEG_2169 '	0.0107909	-1.96694	2.91238e-05	8.45207e-05	7.2523e-05	3.41796e-05	2.12182	1.96694
'MSMEG_2170 '	1.83615e-10	-9.73609	2.60582e-05	5.78759e-05	0.000122628	1.72536e-05	7.10739	9.73609
'MSMEG_2171 '	0.221959	-0.653727	7.05104e-05	0.000109746	9.3598e-05	6.67211e-05	1.40282	0.653727
'MSMEG_2172 '	0.113485	-0.945062	0.000210277	0.000274092	0.000207548	0.000145236	1.42904	0.945062
'MSMEG_2173 '	0.993972	-0.00262582	8.48633e-05	0.000103958	1.89056e-05	1.92192e-05	0.983682	0.00262582
'MSMEG_2174 '	0.793718	-0.100334	0.000458039	0.000419873	0.000377388	0.000366147	1.0307	0.100334
'MSMEG_2175 '	0.00125368	-2.90181	3.74848e-05	3.45072e-05	2.30379e-05	3.1668e-06	7.27484	2.90181
'MSMEG_2176 '	4.32581e-05	-4.36393	7.38547e-06	0	2.24181e-05	0	#DIV/0!	4.36393
'MSMEG_2177 '	1	0	0.000105347	9.38027e-05	9.74205e-05	9.03083e-05	1.07875	0
'MSMEG_2179 '	0.0573839	-1.24121	9.74046e-05	0.000123505	0.000114983	7.26179e-05	1.5834	1.24121
[truncated: 4,293 more rows]
