# Supplementary material for: Maturing Mycobacterium smegmatis peptidoglycan requires non-canonical crosslinks to maintain shape
Source: eLife. 2018 Oct 16;7:e37516. doi: 10.7554/eLife.37516 (PMC6231781; doi:10.7554/eLife.37516)
Supplement: Figure 1—source data 2. [file elife-37516-fig1-data2.xlsx]

## Sheet: Mean FDAA incorporation
WT FDAA mean	delta LDT FDAA mean	delta LDTcomp FDAA mean
0.114627	0.0100589	0.049634
0.130603	0.0138634	0.0626072
0.137065	0.0157276	0.0722421
0.136656	0.0172051	0.0777523
0.132036	0.0184983	0.0802798
0.126162	0.0197929	0.0809943
0.120025	0.021089	0.0796212
0.114378	0.0221443	0.0774134
0.108389	0.023065	0.0763404
0.103516	0.0238163	0.0757609
0.100239	0.024375	0.0744752
0.0972833	0.0248358	0.0738303
0.0944484	0.0251152	0.0731176
0.0928571	0.0254953	0.0721281
0.0910082	0.0259403	0.0715956
0.0895341	0.0261453	0.0712263
0.0881005	0.0265734	0.0706233
0.0874597	0.026768	0.0704782
0.0870357	0.027114	0.0702742
0.0868269	0.0273837	0.0702357
0.0865975	0.0276081	0.0703953
0.0865121	0.027771	0.0703272
0.0865144	0.0278939	0.0703895
0.0864296	0.0279505	0.0703464
0.0865992	0.028152	0.0701337
0.0865318	0.0283182	0.070232
0.0867422	0.0280048	0.0702288
0.0866677	0.0279836	0.0701366
0.0867907	0.0276431	0.0700871
0.0870035	0.0280018	0.0700477
0.0872162	0.0282369	0.070085
0.0875296	0.0281683	0.0702995
0.0877012	0.0280002	0.0706702
0.0876406	0.028134	0.0710208
0.0877773	0.0277435	0.0715804
0.0879479	0.0276722	0.0723951
0.0882643	0.0277216	0.072491
0.088522	0.0278942	0.0729842
0.0889849	0.0275692	0.073728
0.0897338	0.0278793	0.0744303
0.0904338	0.0279506	0.0747654
0.0916095	0.0275607	0.0749665
0.0926377	0.0277237	0.0753156
0.0928941	0.0278244	0.0756571
0.0932613	0.027696	0.0761691
0.0932339	0.0274841	0.0763138
0.0934031	0.0273934	0.0764828
0.0940258	0.0272325	0.0763406
0.0948942	0.0272719	0.0765384
0.095806	0.0271672	0.0769675
0.0968302	0.0273531	0.0773618
0.0973674	0.0274106	0.0776209
0.0980728	0.027575	0.0781876
0.0989799	0.0272102	0.0790917
0.100289	0.0274001	0.0795026
0.101356	0.0275849	0.0799997
0.102461	0.027381	0.0809692
0.103943	0.0274251	0.0812703
0.105616	0.0271741	0.0818942
0.10722	0.0273281	0.0826256
0.108875	0.0274342	0.0841797
0.110176	0.0275528	0.0848926
0.111549	0.0275862	0.0857108
0.113221	0.0275462	0.0869072
0.114822	0.0272496	0.0876398
0.116513	0.0271587	0.0878492
0.11815	0.0270948	0.0891818
0.119971	0.0273958	0.0904603
0.121899	0.0273668	0.0918743
0.123935	0.0269754	0.0929906
0.126252	0.0268319	0.09407
0.128654	0.0267369	0.0957197
0.131002	0.0265177	0.0969632
0.133223	0.0266871	0.0979718
0.135655	0.0264111	0.0994169
0.138256	0.0263627	0.100177
0.141026	0.0261986	0.101628
0.14393	0.025876	0.103402
0.147052	0.0256517	0.10518
0.150939	0.0255907	0.106914
0.154148	0.0253709	0.108681
0.157669	0.025283	0.110146
0.162682	0.0251067	0.111874
0.167864	0.0250787	0.114206
0.172374	0.0251209	0.116316
0.177302	0.0249184	0.118848
0.183456	0.024605	0.12117
0.189999	0.024851	0.123463
0.197579	0.0251343	0.1264
0.205127	0.0248865	0.130812
0.213769	0.0255014	0.134515
0.22448	0.0262239	0.138007
0.237307	0.0272659	0.142202
0.251339	0.0285307	0.147293
0.26539	0.0307675	0.15095
0.275466	0.0334915	0.154027
0.276943	0.0368142	0.155091
0.266119	0.0386443	0.151059
0.232858	0.0383783	0.13673
0.138047	0.0190436	0.106434

## Sheet: WT single cell distribution
X-axis (normalized cell length		FDAA distribution
0
0.01					0.0241041		0.0778399	0.075341	0.247337		0.0479523	0.141802			0.129581	0.241508	0.183266	0.191731	0.103889	0.0399588	0.121588	0.257254	0.0636851		0.128855	0.122076	0.0567803	0.144212	0.0461808	0.0520673	0.00340469	0.191236	0.125683	0.115485	0.0592326	0.218359	0.106742	0.0367626		0.102749	0.255597		0.0514524	0.0552669	0.0784732			0.148011	0.0564812
0.02		0.190196	0.17784	0.105237	0.0585639	0.0581801	0.0927478	0.0992279	0.295411	0.150631	0.204633	0.148603	0.0786316	0.115439	0.136505	0.246293	0.194587	0.228407	0.17155	0.0762511	0.131806	0.281985	0.113012	0.0141098	0.135541	0.148066	0.0923366	0.151695	0.0544086	0.0728494	0.00637677	0.205857	0.16743	0.142616	0.0659926	0.241157	0.122019	0.0717776	0.114566	0.12184	0.305848	0.0797488	0.0601414	0.0704008	0.0898883	0.0777463	0.0249267	0.208345	0.0853512
0.03		0.182673	0.181185	0.105127	0.0929389	0.0730451	0.109665	0.11071	0.263931	0.161921	0.223434	0.15068	0.0864325	0.136388	0.136582	0.2295	0.185076	0.201682	0.175516	0.089508	0.135699	0.295809	0.112936	0.0172721	0.133938	0.164083	0.10236	0.14947	0.0591904	0.0824071	0.0125971	0.20229	0.172443	0.142103	0.0736171	0.257249	0.118658	0.0917772	0.108564	0.136972	0.30949	0.101922	0.0795924	0.0860739	0.11137	0.0829891	0.0394937	0.227814	0.137801
0.04		0.171999	0.164149	0.100974	0.143333	0.0857399	0.111894	0.118421	0.232744	0.162598	0.208293	0.140782	0.0906614	0.143687	0.132579	0.205925	0.16338	0.18311	0.172908	0.0903012	0.137781	0.270419	0.113147	0.0219496	0.125546	0.171381	0.0967923	0.139597	0.0664789	0.0847143	0.022782	0.180985	0.169118	0.134036	0.083051	0.242313	0.115062	0.104419	0.1037	0.144747	0.286453	0.0963423	0.0922527	0.0967815	0.126312	0.0860394	0.0620865	0.218594	0.242315
0.05		0.155665	0.151644	0.0965243	0.179328	0.0875205	0.109479	0.12615	0.200049	0.159628	0.181041	0.131195	0.0946721	0.14542	0.127189	0.183449	0.145112	0.165665	0.170301	0.0905159	0.136428	0.22764	0.113875	0.0266554	0.114688	0.161988	0.0922995	0.124926	0.0737546	0.0825993	0.0380961	0.16381	0.155965	0.125655	0.0921443	0.224687	0.109112	0.102608	0.0939114	0.149072	0.258132	0.088135	0.0961965	0.0916892	0.124323	0.084158	0.0923653	0.206651	0.263062
0.06		0.142644	0.130736	0.0920766	0.184928	0.0757498	0.105044	0.123406	0.188196	0.155357	0.16569	0.120591	0.093176	0.141075	0.126449	0.164227	0.120589	0.15105	0.167539	0.0906197	0.130786	0.20738	0.111322	0.031391	0.106009	0.147653	0.0907134	0.112184	0.0796724	0.0785019	0.0640356	0.150298	0.14729	0.117324	0.099906	0.205952	0.102947	0.0974338	0.0859496	0.143195	0.231101	0.082836	0.0935885	0.0886496	0.123353	0.0785562	0.124289	0.192304	0.240869
0.07		0.137047	0.109142	0.088117	0.177448	0.0698156	0.101686	0.120153	0.172017	0.150034	0.14402	0.107917	0.0928511	0.13334	0.118206	0.151938	0.107471	0.126467	0.160213	0.0904481	0.122287	0.190845	0.100239	0.0400701	0.102455	0.13384	0.0852519	0.104915	0.0841272	0.0731058	0.106275	0.137961	0.138183	0.100293	0.106707	0.183986	0.0967823	0.0923926	0.0800334	0.134167	0.215507	0.0770536	0.0887299	0.0864287	0.122849	0.0779753	0.140804	0.171503	0.2043
0.08		0.133623	0.095741	0.0860187	0.151632	0.0692106	0.100277	0.11513	0.160409	0.144174	0.133276	0.10174	0.0947932	0.120868	0.112129	0.138867	0.10157	0.11308	0.152771	0.0849958	0.113367	0.175938	0.0900074	0.0512392	0.0965696	0.122804	0.078407	0.0984384	0.0877102	0.0665788	0.163989	0.123743	0.125826	0.094334	0.105545	0.163401	0.0918456	0.0873676	0.0764055	0.127117	0.206098	0.0667823	0.0840449	0.0788735	0.111068	0.0756649	0.136523	0.152733	0.182985
0.09		0.127926	0.0870236	0.0843471	0.14182	0.0638603	0.0998027	0.107512	0.146801	0.130402	0.116633	0.0954723	0.0923994	0.112975	0.108473	0.124516	0.0954659	0.102366	0.14527	0.0777976	0.110171	0.164471	0.0830296	0.0658503	0.0926782	0.116123	0.0770492	0.0931319	0.0896647	0.067024	0.186247	0.115035	0.114727	0.0881004	0.104387	0.152749	0.093035	0.0843203	0.0738849	0.113677	0.197469	0.0597726	0.0798167	0.0730397	0.101916	0.0728665	0.129832	0.145415	0.154937
0.1		0.125213	0.0793953	0.079257	0.118214	0.0648302	0.0989878	0.0965446	0.139335	0.124215	0.106979	0.0904594	0.0885551	0.106695	0.106195	0.110507	0.0917656	0.0947065	0.137875	0.0709385	0.107064	0.146425	0.0767942	0.106537	0.0897201	0.109765	0.075461	0.0907922	0.0929449	0.0659974	0.179663	0.111527	0.10393	0.0817816	0.104677	0.146342	0.092587	0.0823262	0.0728976	0.100184	0.193878	0.0633962	0.0765027	0.0692935	0.097251	0.0730432	0.119189	0.137638	0.145582
0.11		0.120496	0.0750396	0.0760064	0.10406	0.0661894	0.0976629	0.0904858	0.138197	0.111089	0.0977676	0.0848159	0.0855146	0.101709	0.102707	0.101333	0.0877881	0.0907607	0.131622	0.0693895	0.106895	0.145103	0.0752563	0.146667	0.0882298	0.105792	0.0735468	0.0925108	0.0970307	0.0641745	0.172457	0.106581	0.0951141	0.0773543	0.104966	0.139336	0.0922989	0.0805348	0.0724969	0.0930168	0.185354	0.0627068	0.0734456	0.0664404	0.0916593	0.0713678	0.10729	0.134641	0.135235
0.12		0.115197	0.0744297	0.0741391	0.0914012	0.063612	0.0985935	0.086285	0.13086	0.104763	0.0942432	0.086329	0.0835542	0.0975962	0.0996373	0.092416	0.0863237	0.0881376	0.12734	0.0662788	0.104986	0.133205	0.073626	0.172191	0.0874677	0.109757	0.0699293	0.0939916	0.0995622	0.0643251	0.163858	0.100348	0.0900537	0.0773649	0.103247	0.141465	0.0929804	0.0771062	0.0717311	0.0858855	0.180989	0.0586524	0.0705403	0.0642283	0.0860719	0.0698105	0.0995359	0.12924	0.136196
0.13		0.113702	0.0728116	0.0749162	0.0827128	0.0652432	0.098509	0.082497	0.124355	0.0959632	0.0919669	0.0821865	0.0814026	0.0946413	0.100164	0.0858139	0.0840253	0.0871712	0.127995	0.0618521	0.100211	0.11934	0.0708077	0.187957	0.0823324	0.106934	0.0665405	0.0938183	0.101152	0.0631908	0.150206	0.099178	0.0880373	0.0768998	0.101271	0.138358	0.0942768	0.0750827	0.0732936	0.0846869	0.173778	0.0583576	0.0687418	0.0636138	0.0843546	0.072393	0.0871284	0.123045	0.114604
0.14		0.115452	0.0739025	0.0730994	0.0789431	0.0659086	0.102073	0.0809228	0.115325	0.0854781	0.0909099	0.0808117	0.0830952	0.0911243	0.101927	0.0826786	0.0830866	0.0868492	0.120556	0.0603123	0.0964777	0.106361	0.0680053	0.201682	0.0860373	0.102496	0.0680865	0.0931936	0.101675	0.0613569	0.141063	0.095188	0.0847818	0.0724203	0.10178	0.137578	0.0942052	0.0748075	0.0722496	0.0795667	0.168953	0.0601181	0.0674654	0.0638169	0.0832141	0.0711317	0.0961181	0.116438	0.10535
0.15		0.10773	0.0750019	0.0686782	0.0760535	0.0653328	0.0976659	0.0788165	0.113528	0.0799043	0.0907017	0.0845825	0.0843499	0.0879987	0.100406	0.0791951	0.0823666	0.0880785	0.113586	0.0589268	0.0933894	0.0906834	0.0680614	0.225052	0.0872777	0.0980416	0.0682243	0.0919944	0.105505	0.0591815	0.129153	0.0961446	0.0784517	0.0724878	0.103057	0.130082	0.0936775	0.0753585	0.0699754	0.076428	0.156749	0.0576776	0.0677289	0.0645417	0.0828183	0.0696915	0.0868262	0.110917	0.0959506
0.16		0.11264	0.0778722	0.0677224	0.0732978	0.0659156	0.102035	0.0774971	0.100567	0.0774241	0.0923002	0.0818397	0.0837934	0.0896529	0.10008	0.0738382	0.0828736	0.088111	0.112987	0.0579073	0.0942361	0.0824308	0.0681174	0.212115	0.0870522	0.0992813	0.0668836	0.0915276	0.108326	0.0603226	0.124975	0.09609	0.0794763	0.0732726	0.101955	0.122255	0.0934337	0.0756409	0.0703844	0.075095	0.152211	0.0609257	0.0694841	0.0656653	0.0805823	0.073449	0.0813586	0.104074	0.0858554
0.17		0.108922	0.0765607	0.0660901	0.0718638	0.067767	0.103044	0.0773822	0.0965672	0.0756822	0.088597	0.0826852	0.0802301	0.0909831	0.0961513	0.0702028	0.0836369	0.0877829	0.112804	0.0575749	0.0910257	0.0745356	0.0658288	0.180504	0.0873412	0.0985229	0.0667337	0.0927304	0.108431	0.0624242	0.122528	0.0930032	0.078558	0.0696428	0.0994941	0.118316	0.093865	0.0758713	0.0698917	0.0743901	0.146126	0.0596474	0.0726414	0.0660809	0.0775821	0.0765537	0.0830509	0.0940993	0.0816022
0.18		0.103946	0.074693	0.0630232	0.0691746	0.0691979	0.101619	0.075796	0.0952845	0.0738611	0.090262	0.0833982	0.080885	0.0919024	0.0986322	0.0689271	0.0822669	0.0874949	0.112061	0.056771	0.0942903	0.0697775	0.0633829	0.19106	0.0888594	0.096708	0.0668557	0.0916551	0.109639	0.064354	0.125102	0.088215	0.0756188	0.0697682	0.0980867	0.111157	0.0949536	0.0762745	0.069692	0.0737141	0.134349	0.060007	0.072924	0.0652556	0.0728057	0.0787003	0.0829035	0.0868826	0.0752317
0.19		0.0981198	0.0760844	0.0618943	0.0662915	0.068772	0.102986	0.0764137	0.0923259	0.072663	0.0904638	0.0832555	0.0801004	0.0902554	0.0973941	0.0682546	0.0781277	0.0865395	0.110308	0.0557799	0.0954665	0.0686096	0.0616127	0.189302	0.08753	0.095236	0.0671955	0.0947233	0.111216	0.0648982	0.1236	0.086619	0.0711582	0.0718736	0.0977165	0.108761	0.0961789	0.0769461	0.0701753	0.0742625	0.135218	0.0626264	0.0724389	0.0661353	0.0713705	0.0783234	0.086743	0.0813212	0.0768269
0.2		0.0903112	0.0756217	0.0607572	0.0635889	0.0674426	0.104005	0.0769694	0.0915956	0.0719207	0.091127	0.0819994	0.079624	0.0881062	0.09747	0.0680065	0.0799512	0.0869484	0.111704	0.0546673	0.0940097	0.0665248	0.0599454	0.176093	0.0868198	0.0943142	0.0673553	0.0997712	0.11291	0.0677142	0.120138	0.0895642	0.0761739	0.0717399	0.096799	0.106632	0.0967513	0.0769869	0.072201	0.0721819	0.135295	0.0628647	0.0710617	0.0674704	0.0736792	0.0812767	0.089206	0.0779093	0.0794519
0.21		0.0827036	0.0762743	0.0583776	0.0637199	0.0638916	0.104658	0.076318	0.0899802	0.0710681	0.0901087	0.0821544	0.0815193	0.0877026	0.096807	0.0688949	0.0802477	0.0871614	0.112892	0.0538511	0.0946774	0.0641436	0.0607198	0.175503	0.0868402	0.0944888	0.0673767	0.101818	0.114765	0.0696201	0.113355	0.092031	0.0698133	0.0715849	0.094915	0.101552	0.0966853	0.0762721	0.0701953	0.0716588	0.126163	0.0635283	0.0716517	0.0677347	0.0728905	0.084533	0.0890264	0.0780667	0.0787119
0.22		0.0799781	0.0746131	0.0562516	0.0648908	0.0656737	0.106734	0.0744087	0.0898472	0.0706402	0.0877113	0.0807393	0.0807525	0.0880832	0.096087	0.0698713	0.0788701	0.0871471	0.113545	0.0553525	0.0956487	0.0660223	0.0621148	0.176078	0.0871424	0.095694	0.0676309	0.101352	0.116744	0.0703836	0.111511	0.0930705	0.0725353	0.0729361	0.0936119	0.0985832	0.0959852	0.0751646	0.0690914	0.0701512	0.124962	0.0657061	0.0751822	0.0676995	0.0716285	0.0844271	0.0903036	0.0735265	0.0810701
0.23		0.0734141	0.0750441	0.0545449	0.0651708	0.0645695	0.107971	0.0758767	0.0880756	0.0713438	0.0903903	0.0822522	0.0792375	0.0894159	0.0958262	0.0694052	0.0803066	0.087225	0.113561	0.0568298	0.0950512	0.0635936	0.0618998	0.177679	0.0860336	0.0934303	0.0676737	0.101186	0.119297	0.0698414	0.11393	0.0945679	0.0744544	0.0747811	0.094365	0.0997595	0.0955989	0.0737928	0.071512	0.0694861	0.116591	0.0629651	0.0749759	0.0673583	0.0713349	0.0854016	0.0933471	0.0746224	0.0814796
0.24		0.07208	0.0749172	0.0549527	0.0673769	0.0646948	0.107512	0.0768345	0.0859083	0.0719891	0.0893867	0.082268	0.0780451	0.08981	0.0945949	0.0670887	0.0805821	0.0867419	0.113655	0.0541875	0.0948845	0.063355	0.0610764	0.177189	0.0827317	0.0955239	0.0671325	0.100465	0.120555	0.069895	0.112715	0.0948645	0.0725167	0.0795296	0.0948233	0.100706	0.0984675	0.0724252	0.0697108	0.0712215	0.111609	0.0625688	0.0730825	0.0654599	0.0705797	0.085175	0.0960272	0.0744572	0.0787268
0.25		0.0712698	0.0735553	0.054355	0.0672189	0.0673676	0.109562	0.0758586	0.0858111	0.0679826	0.0916739	0.07998	0.0778005	0.0897906	0.0947849	0.0670028	0.0839674	0.0880088	0.113823	0.0566517	0.0937694	0.0645637	0.0583972	0.175614	0.0829095	0.0989168	0.0683883	0.0996732	0.120292	0.0714176	0.112799	0.0947446	0.0751543	0.0801435	0.092025	0.0993828	0.100132	0.0714313	0.0690984	0.0722762	0.108674	0.0634822	0.0747962	0.0638775	0.0693836	0.0795749	0.0996912	0.0745127	0.0811977
0.26		0.0721911	0.0745435	0.052969	0.0690707	0.0689589	0.107354	0.0772442	0.0864476	0.065569	0.0913602	0.0786133	0.0774173	0.0886193	0.0937632	0.0689839	0.0864975	0.0875948	0.114064	0.0576336	0.0974171	0.0620382	0.0547248	0.172357	0.0811918	0.0995503	0.0706557	0.0990953	0.120674	0.0749646	0.11298	0.0942798	0.0752679	0.0785346	0.0892266	0.0975934	0.100561	0.0731748	0.0694263	0.0720083	0.103377	0.0624429	0.0754924	0.0639338	0.069396	0.083173	0.0992256	0.0747483	0.0811116
0.27		0.071553	0.0754623	0.052259	0.069298	0.0664047	0.108302	0.0768107	0.0901051	0.0663558	0.0924786	0.0798678	0.0783388	0.0881567	0.0922687	0.0717872	0.0861102	0.0873716	0.113927	0.0547409	0.0974834	0.0653049	0.0545088	0.170687	0.0829426	0.101438	0.0673991	0.0985239	0.121066	0.0762819	0.10994	0.0944637	0.0794191	0.078487	0.0916683	0.101536	0.100057	0.0750363	0.0705171	0.0722198	0.100477	0.0631223	0.0731298	0.065397	0.0696589	0.0878791	0.102434	0.0732422	0.0832043
0.28		0.0688851	0.0743162	0.0518711	0.0675238	0.0743604	0.106673	0.0763854	0.0904723	0.0673406	0.0916667	0.08047	0.0788702	0.0885317	0.0915614	0.0698715	0.0885383	0.0871694	0.113632	0.0559805	0.100616	0.0677715	0.0568471	0.169356	0.0835517	0.102169	0.0655003	0.0990865	0.121281	0.0767472	0.11224	0.096795	0.078952	0.0833636	0.0944069	0.0966722	0.0993068	0.0764798	0.0709526	0.0723244	0.0962128	0.0624825	0.0720898	0.0676956	0.070099	0.0845095	0.101748	0.0748095	0.081681
0.29		0.0669924	0.0750509	0.0519134	0.0677773	0.0713786	0.108565	0.0768422	0.0918785	0.0685702	0.0896655	0.0791839	0.0782443	0.0906798	0.0883146	0.0711799	0.0867902	0.0888006	0.113877	0.055953	0.101791	0.0673796	0.0579894	0.167392	0.0829584	0.101421	0.0661314	0.101284	0.1195	0.0773522	0.110377	0.101575	0.0811042	0.0814641	0.0949516	0.0977634	0.0999735	0.0773529	0.0710991	0.0730205	0.0936092	0.060628	0.0721122	0.0675452	0.0714083	0.0868741	0.0993367	0.0752574	0.0821435
0.3		0.0665029	0.0743518	0.0510126	0.0677794	0.0730672	0.108292	0.0783315	0.094701	0.0706177	0.0871031	0.0793245	0.0762696	0.0926141	0.0881238	0.0743814	0.0882995	0.0904707	0.113514	0.054638	0.101094	0.0687581	0.0579365	0.160217	0.0843064	0.101438	0.0668904	0.102511	0.117498	0.0798373	0.108572	0.0997117	0.0786178	0.0840564	0.0949755	0.0949792	0.0990413	0.0802356	0.0711136	0.0726141	0.0938926	0.063244	0.0716058	0.0674308	0.0734322	0.0900138	0.105159	0.0759083	0.0840914
0.31		0.0655825	0.0743738	0.0507809	0.0682174	0.0760767	0.107487	0.0789606	0.0965446	0.0733206	0.0871485	0.0792082	0.0773172	0.0900605	0.0889871	0.0772641	0.0918968	0.0885417	0.112663	0.0516479	0.103587	0.0660633	0.0578976	0.151368	0.084498	0.102926	0.0674889	0.103182	0.119125	0.0807196	0.110947	0.100258	0.0786739	0.0845103	0.0954202	0.0921752	0.0987388	0.0823984	0.0713688	0.068933	0.0923796	0.066215	0.0713047	0.0673749	0.0719362	0.0868005	0.111138	0.0763673	0.0863485
0.32		0.0669736	0.0726058	0.0526517	0.0685869	0.0767385	0.109464	0.0782449	0.0967184	0.0764626	0.0875839	0.0775265	0.0785616	0.0891393	0.0880719	0.0759776	0.0954486	0.0892519	0.111063	0.0532368	0.10686	0.0680787	0.0578775	0.151604	0.0855294	0.104695	0.0648072	0.102234	0.119904	0.0811401	0.107349	0.102594	0.0787685	0.0849727	0.0960741	0.0916699	0.0996905	0.0791848	0.0699215	0.0695888	0.0911451	0.0650012	0.0730291	0.068568	0.0704687	0.0872894	0.111386	0.0774491	0.0879733
0.33		0.067014	0.0717092	0.0537449	0.0665925	0.078209	0.110361	0.0764363	0.0929446	0.0750627	0.0900667	0.0784445	0.0796823	0.0900818	0.0882042	0.0794432	0.0945035	0.0886237	0.108151	0.0546691	0.10661	0.0702299	0.0573965	0.147314	0.0863362	0.105406	0.0643524	0.100279	0.120004	0.0812709	0.106204	0.101662	0.0761329	0.088047	0.0957085	0.0909376	0.101338	0.0812777	0.0685286	0.0701542	0.0937531	0.0628439	0.0736167	0.0698536	0.0704067	0.0891532	0.112956	0.0754549	0.0877289
0.34		0.0667934	0.0713952	0.0544337	0.067394	0.076708	0.108909	0.0773997	0.0944675	0.0795633	0.0890033	0.0784999	0.0821471	0.0905703	0.0869088	0.0799599	0.0923321	0.0908705	0.105659	0.052287	0.106806	0.0704063	0.0560647	0.139427	0.08816	0.106502	0.0669994	0.0984111	0.120318	0.0809465	0.104743	0.100411	0.0745263	0.0895975	0.0944415	0.0897606	0.0999608	0.0837218	0.0677075	0.0692931	0.0918849	0.0631292	0.0726429	0.0694181	0.0708403	0.0889018	0.115315	0.0780006	0.0898174
0.35		0.0668729	0.0702028	0.054589	0.0669373	0.0743238	0.108868	0.0768974	0.0947037	0.0816115	0.0892997	0.0790713	0.0817635	0.0909354	0.0878347	0.0805461	0.0926432	0.0899211	0.105618	0.0532033	0.109575	0.0740668	0.0558017	0.139907	0.090557	0.10621	0.0678607	0.0976616	0.120035	0.0806669	0.105526	0.0994896	0.0762738	0.0906746	0.0928771	0.08821	0.098852	0.0853559	0.0676694	0.0697053	0.0912998	0.0646166	0.0739506	0.0694693	0.0716285	0.0866415	0.116628	0.0768958	0.0905993
0.36		0.0672379	0.0698398	0.0544744	0.0664776	0.0782878	0.109506	0.0756471	0.092402	0.0822596	0.0864676	0.0807272	0.0819283	0.0912321	0.0877582	0.0842193	0.0922828	0.0876927	0.103885	0.0546012	0.111205	0.0726035	0.0583703	0.137227	0.0913956	0.104776	0.0682179	0.09842	0.118846	0.0806933	0.1066	0.0994522	0.0792504	0.091343	0.0908711	0.0871266	0.0975395	0.0859082	0.0687712	0.0699039	0.08644	0.0665988	0.0761626	0.069955	0.0708506	0.0840946	0.115763	0.0768639	0.0903858
0.37		0.0680767	0.0726309	0.0541818	0.0655273	0.0818774	0.107334	0.0739778	0.0915362	0.0838413	0.0863109	0.080902	0.0827363	0.0917024	0.0881859	0.0870031	0.0929006	0.0867942	0.102647	0.0559997	0.1078	0.0754287	0.0606434	0.130735	0.0905267	0.10637	0.0686914	0.0984811	0.119652	0.0812956	0.108768	0.0990602	0.0761534	0.0919432	0.0893129	0.0877346	0.0964563	0.0867773	0.0699669	0.0686906	0.0877492	0.0644525	0.0741562	0.0731733	0.0703623	0.0882814	0.116096	0.0788419	0.09199
0.38		0.0677984	0.073553	0.0549816	0.0697659	0.0842378	0.107742	0.0721474	0.0906536	0.0839086	0.0896984	0.0819731	0.0832176	0.0923693	0.0882155	0.0869096	0.0910532	0.0846582	0.103242	0.0556348	0.107672	0.0753235	0.0617124	0.128409	0.0941295	0.106117	0.0693889	0.0984772	0.120836	0.0809039	0.107436	0.0971523	0.0720453	0.0931053	0.0889359	0.0884573	0.0961334	0.0884759	0.0705931	0.0706327	0.0866205	0.0640526	0.0733142	0.0751147	0.0710835	0.0899716	0.114007	0.082758	0.093896
0.39		0.0678138	0.0722304	0.056717	0.0685573	0.0861794	0.10807	0.0714309	0.0906486	0.0812778	0.0896197	0.0816082	0.0834094	0.0905315	0.0871652	0.0878268	0.0919509	0.0837776	0.101745	0.0561216	0.107168	0.0766629	0.0626422	0.126801	0.094548	0.10417	0.070326	0.0989321	0.12185	0.0821054	0.108348	0.103908	0.0791929	0.0956986	0.0884559	0.0870419	0.0971162	0.0922768	0.0701584	0.0697826	0.0796503	0.0668512	0.0752406	0.0730883	0.0714715	0.0901936	0.117749	0.0871036	0.0971038
0.4		0.0698448	0.0713467	0.059554	0.065516	0.0856174	0.107691	0.0713567	0.0953801	0.084447	0.0993627	0.0800201	0.0831521	0.0883578	0.0861534	0.0911695	0.0886194	0.0837909	0.100159	0.0571991	0.109211	0.080213	0.0625771	0.125706	0.0943872	0.100149	0.0692637	0.10019	0.121613	0.0844146	0.110735	0.105812	0.0801262	0.0970401	0.0873145	0.0880513	0.102174	0.0926656	0.0718464	0.0706139	0.0764803	0.074707	0.075536	0.0725731	0.0716321	0.0933406	0.119553	0.0922416	0.0999946
0.41		0.0724471	0.0712053	0.0613732	0.0679989	0.0851534	0.106894	0.0717397	0.096832	0.0839098	0.105671	0.0805105	0.0836912	0.0878575	0.0848692	0.0963756	0.0898893	0.0841375	0.0989348	0.0587368	0.110085	0.0804157	0.0626064	0.12394	0.0946936	0.101467	0.0683214	0.102042	0.121101	0.0856688	0.112472	0.107255	0.0785363	0.0995988	0.0861731	0.0825368	0.102872	0.0929247	0.0745986	0.0716774	0.0768491	0.0789485	0.0746886	0.0728766	0.0714515	0.0944802	0.117689	0.0988877	0.107311
0.42		0.0790018	0.0711537	0.0623685	0.07064	0.0886728	0.107057	0.0725631	0.0989477	0.0848638	0.10611	0.0816735	0.0866118	0.0872783	0.0820188	0.0969727	0.0866621	0.0853962	0.0970171	0.0597261	0.108972	0.0806789	0.0644546	0.122029	0.0928342	0.102313	0.0695363	0.103575	0.123869	0.0867947	0.113039	0.109414	0.0825651	0.100058	0.0857956	0.0855714	0.103115	0.0939127	0.0768705	0.0709431	0.0738261	0.0827973	0.0776431	0.0734866	0.0713713	0.09414	0.118408	0.103738	0.116956
0.43		0.087638	0.0715827	0.0619826	0.0670251	0.0881592	0.108213	0.0725136	0.106016	0.0836537	0.0998278	0.0826984	0.0875184	0.0866119	0.0843919	0.099396	0.0869453	0.0872089	0.0957062	0.0591488	0.108576	0.083828	0.0663027	0.120165	0.099479	0.102297	0.070006	0.107322	0.122545	0.0877019	0.11107	0.111976	0.0807974	0.099523	0.0854243	0.0880095	0.106019	0.095058	0.0774059	0.0697819	0.0729471	0.094125	0.0806656	0.0731217	0.0716392	0.0957135	0.120432	0.105911	0.122194
0.44		0.0898891	0.0716387	0.0639392	0.0700517	0.0891184	0.108051	0.0730152	0.107794	0.0840594	0.100763	0.086888	0.087923	0.085991	0.0808506	0.102653	0.0903539	0.0925608	0.0951143	0.0564367	0.106727	0.0838534	0.0647678	0.116291	0.0988679	0.102981	0.0698548	0.106097	0.117509	0.0883573	0.112377	0.112691	0.0776826	0.101376	0.0848824	0.0924693	0.10354	0.0960102	0.0781789	0.0717975	0.0713104	0.101141	0.0815087	0.0712638	0.0715561	0.0944161	0.118419	0.10975	0.113453
0.45		0.0879936	0.0703016	0.0671596	0.0697408	0.0925167	0.109555	0.0745793	0.10532	0.0854455	0.0983509	0.0888896	0.0886927	0.0853071	0.0855538	0.103775	0.0920889	0.0997255	0.0958077	0.0587213	0.106023	0.0846084	0.063153	0.111729	0.100542	0.102575	0.0730957	0.107766	0.115916	0.0903771	0.111396	0.115389	0.0821827	0.105799	0.0843111	0.0968995	0.10604	0.0965442	0.0792622	0.070944	0.0715559	0.0981276	0.0824957	0.0725769	0.0712418	0.0906703	0.115389	0.10546	0.10541
0.46		0.0792887	0.0698805	0.0725735	0.0650742	0.0946421	0.109999	0.0765695	0.0992683	0.0862354	0.0998265	0.0886106	0.0901468	0.0841906	0.0847854	0.106711	0.0953421	0.104138	0.0940158	0.0591566	0.106654	0.0873844	0.0624473	0.107794	0.10199	0.103236	0.075673	0.110435	0.114284	0.0922179	0.111095	0.115954	0.0800076	0.10694	0.0852416	0.092747	0.107669	0.0960351	0.0800187	0.0687843	0.0725496	0.0875287	0.0836497	0.0746941	0.0716661	0.0906569	0.112919	0.104748	0.102546
0.47		0.0788703	0.0708197	0.07722	0.0656126	0.0930364	0.110006	0.0749823	0.096251	0.0858041	0.102257	0.0909899	0.0886787	0.0842505	0.0858908	0.108132	0.0995723	0.105626	0.0914155	0.0585975	0.105547	0.0899726	0.0618368	0.105399	0.102295	0.106981	0.0752154	0.11122	0.112298	0.0935512	0.11193	0.116214	0.0839061	0.108197	0.0867903	0.0859365	0.10895	0.0935186	0.0787461	0.0688752	0.0713325	0.0791197	0.0848986	0.0760193	0.0714333	0.0913721	0.111264	0.101403	0.103315
0.48		0.077258	0.0722971	0.0815886	0.0664212	0.101072	0.111098	0.0738541	0.0981275	0.0840995	0.099656	0.0925186	0.0930206	0.0855774	0.0863327	0.110256	0.0988482	0.0976493	0.0944528	0.0600408	0.106866	0.093588	0.0630466	0.103774	0.107504	0.105191	0.0767034	0.110979	0.1132	0.0936629	0.110818	0.118592	0.0879218	0.109311	0.0872297	0.0820586	0.110913	0.0929984	0.0801511	0.0694185	0.0717773	0.079075	0.0861899	0.0768148	0.0694503	0.0927817	0.109941	0.0996335	0.105481
0.49		0.0779311	0.0759457	0.0869319	0.0686427	0.0961041	0.112121	0.0749232	0.0984038	0.0880522	0.0975073	0.0906579	0.0956272	0.086773	0.0859523	0.11409	0.0983156	0.0923996	0.0935315	0.062106	0.108179	0.0945705	0.064624	0.0993937	0.107288	0.105286	0.0794217	0.110695	0.114487	0.0961671	0.111543	0.1153	0.0881944	0.109801	0.0867927	0.0796397	0.111398	0.0958234	0.0852152	0.0692576	0.074194	0.0706348	0.087715	0.0771187	0.0695213	0.0935347	0.113266	0.0980092	0.104836
0.5		0.0808703	0.0748905	0.0917247	0.0726102	0.094679	0.112292	0.0784856	0.0974034	0.0835561	0.0961009	0.0951099	0.0947111	0.0876223	0.0870201	0.11493	0.102716	0.0920279	0.0919645	0.0636698	0.111961	0.0996482	0.0656298	0.093646	0.105917	0.107089	0.0801857	0.111007	0.114681	0.0979886	0.112756	0.117057	0.0916396	0.111151	0.0868552	0.0787269	0.110678	0.0986644	0.0838836	0.0679658	0.0843332	0.0731095	0.0892547	0.0772989	0.0707822	0.0932447	0.112194	0.0978466	0.0998076
0.51		0.0828943	0.0777208	0.0961077	0.071628	0.0955592	0.112273	0.0775347	0.095094	0.087041	0.103636	0.0990021	0.0968886	0.0866574	0.086898	0.116872	0.107369	0.0926979	0.0927903	0.0638834	0.11496	0.103707	0.066454	0.086623	0.106304	0.106764	0.0810947	0.111433	0.11783	0.0987692	0.115417	0.117632	0.0897613	0.111714	0.0876485	0.0800394	0.111558	0.100062	0.0833241	0.0648685	0.0898267	0.071429	0.0908226	0.0782366	0.0726772	0.0918815	0.114065	0.0972315	0.0986064
0.52		0.0841686	0.0776163	0.100635	0.0707392	0.0962414	0.110545	0.0769404	0.0956081	0.0904446	0.0962907	0.100263	0.0968763	0.0868699	0.0819714	0.117321	0.111169	0.0911286	0.0920509	0.0666298	0.115146	0.102122	0.0675429	0.0833883	0.10763	0.105459	0.08241	0.114456	0.122417	0.100482	0.119051	0.117813	0.092426	0.112388	0.0884101	0.0787432	0.113219	0.101107	0.0845746	0.0694602	0.095298	0.0691254	0.0931847	0.0813314	0.073517	0.0960331	0.116192	0.0972759	0.0989395
0.53		0.0899955	0.0775363	0.10624	0.0736981	0.0974558	0.107911	0.0779681	0.0954534	0.0885401	0.0965581	0.102308	0.0987825	0.0883525	0.0855971	0.116433	0.109322	0.0916469	0.092031	0.0704759	0.115716	0.109991	0.0687536	0.0798794	0.108696	0.104962	0.0875175	0.119414	0.121367	0.10027	0.120549	0.119252	0.0949419	0.112593	0.0890769	0.0801755	0.114685	0.104146	0.0887323	0.0708981	0.0852236	0.070542	0.0960086	0.0841503	0.072329	0.0980602	0.117241	0.0978153	0.100307
0.54		0.0927382	0.07907	0.112948	0.0762797	0.0961919	0.112445	0.0755405	0.0935643	0.0869369	0.0963514	0.100797	0.101871	0.0900918	0.089314	0.116857	0.110605	0.0913306	0.093569	0.0750021	0.115472	0.103524	0.0705256	0.0758199	0.110144	0.106789	0.0942319	0.121469	0.122923	0.0997143	0.125825	0.116256	0.0963752	0.11328	0.0897489	0.0818204	0.11734	0.104645	0.0892904	0.0724613	0.0802636	0.0727099	0.096183	0.0867682	0.0722337	0.0977114	0.119962	0.101261	0.10467
0.55		0.0969642	0.0795542	0.114718	0.0769134	0.0956128	0.113937	0.0761535	0.0943107	0.0925462	0.100249	0.0997318	0.103016	0.0915874	0.0888883	0.11925	0.109819	0.0935276	0.0952212	0.0780884	0.114985	0.101137	0.0726519	0.0730106	0.114554	0.108841	0.099758	0.12679	0.127482	0.100029	0.123381	0.118764	0.0973656	0.117223	0.0904706	0.0795984	0.120943	0.106562	0.0904133	0.0737182	0.0798122	0.0743524	0.0971159	0.084096	0.0727097	0.100365	0.124175	0.104691	0.103744
0.56		0.100724	0.0804749	0.117905	0.0780887	0.0983712	0.116412	0.0778528	0.0948879	0.0891497	0.0991839	0.101044	0.106507	0.0913516	0.0916973	0.118694	0.111594	0.0942772	0.0978868	0.0830667	0.115309	0.104958	0.0740835	0.0711765	0.113785	0.110816	0.107271	0.128878	0.125711	0.102965	0.126352	0.119655	0.0980699	0.118271	0.0911923	0.0831407	0.123696	0.111364	0.091483	0.075159	0.0710631	0.0749027	0.101601	0.0828231	0.0746933	0.101876	0.131069	0.107005	0.104418
0.57		0.100329	0.0823434	0.123294	0.0801698	0.0956289	0.118454	0.0799087	0.0939205	0.0934969	0.103081	0.100386	0.107662	0.0914477	0.0941981	0.118187	0.111773	0.0931724	0.101387	0.0888705	0.11372	0.104798	0.074937	0.0710357	0.113511	0.112208	0.117581	0.132602	0.123604	0.104855	0.124815	0.119538	0.0974106	0.120672	0.0913708	0.0858781	0.125036	0.115232	0.0910496	0.0792787	0.0728531	0.0765669	0.104951	0.083826	0.0755256	0.10199	0.134357	0.106041	0.100872
0.58		0.100114	0.0822313	0.126613	0.08299	0.0917671	0.11987	0.0823664	0.095213	0.0956894	0.0999541	0.0997471	0.108531	0.0919007	0.0931209	0.121637	0.114266	0.0923938	0.10113	0.0947126	0.113299	0.107879	0.0771253	0.0710616	0.11571	0.109842	0.123305	0.135987	0.122455	0.105081	0.123453	0.120595	0.0975177	0.124828	0.0915137	0.0864111	0.125178	0.116251	0.0913382	0.0839545	0.0700908	0.0788422	0.107207	0.0844942	0.0748785	0.104405	0.13578	0.104668	0.102193
0.59		0.103705	0.081489	0.129515	0.0885009	0.0918244	0.117272	0.0856432	0.0966888	0.0967858	0.104535	0.100938	0.111826	0.0936921	0.0926107	0.120161	0.116545	0.0971987	0.103905	0.0975488	0.114984	0.113604	0.0807703	0.0712864	0.11837	0.112176	0.128156	0.136779	0.123097	0.101959	0.123207	0.122936	0.099181	0.127719	0.0923604	0.0915499	0.126957	0.116203	0.0939119	0.0868083	0.0714296	0.0805416	0.10964	0.0850369	0.0769191	0.105777	0.136239	0.104892	0.0999667
0.6		0.100734	0.08382	0.132197	0.0888934	0.09362	0.116332	0.090166	0.0977619	0.0980839	0.104723	0.103828	0.113514	0.0952798	0.0972662	0.122878	0.116941	0.0970495	0.109003	0.100816	0.116612	0.115801	0.0846509	0.0720549	0.114124	0.11564	0.135947	0.135164	0.124468	0.102332	0.125198	0.122208	0.0984666	0.126166	0.0934035	0.0914724	0.128494	0.11941	0.0979197	0.0896578	0.0705748	0.0812502	0.111642	0.0854666	0.0790872	0.10577	0.1336	0.104733	0.0998767
0.61		0.099428	0.0891691	0.136127	0.0949057	0.0960814	0.116813	0.0954269	0.099247	0.0993288	0.107535	0.106794	0.115925	0.0941159	0.0948377	0.125095	0.11935	0.0963171	0.115517	0.10477	0.116786	0.117602	0.0888688	0.0729724	0.116203	0.117416	0.140612	0.138385	0.126382	0.104726	0.125768	0.12453	0.100679	0.130419	0.0959959	0.0908061	0.127615	0.121363	0.0979511	0.0939534	0.0704656	0.0796831	0.109146	0.0863163	0.0779014	0.109011	0.131037	0.105683	0.102379
0.62		0.105191	0.0948942	0.14009	0.0955295	0.0965704	0.114195	0.098013	0.102272	0.1016	0.104894	0.111934	0.118742	0.0941161	0.095913	0.125262	0.116809	0.096088	0.118011	0.104189	0.115944	0.120917	0.0932446	0.0736	0.114127	0.117945	0.142118	0.14004	0.12695	0.108634	0.12446	0.125921	0.100058	0.133749	0.099509	0.0946331	0.126002	0.124108	0.100654	0.0978899	0.0700679	0.0798315	0.109151	0.0875805	0.0801894	0.111748	0.130486	0.106978	0.102727
0.63		0.10748	0.101671	0.14262	0.101202	0.0989436	0.113551	0.102028	0.104285	0.10643	0.105552	0.110988	0.121429	0.0952916	0.0949562	0.128878	0.122642	0.0968141	0.119441	0.10701	0.115657	0.124325	0.0979203	0.0711593	0.116127	0.119272	0.145963	0.13945	0.126578	0.109519	0.123699	0.122755	0.104161	0.138048	0.103667	0.0978615	0.125889	0.128538	0.104061	0.100954	0.0687311	0.0784835	0.113093	0.0862482	0.0859712	0.113603	0.129737	0.107716	0.101076
0.64		0.110836	0.108788	0.142926	0.107276	0.0990556	0.118441	0.106879	0.105283	0.105045	0.103101	0.117279	0.120014	0.0964737	0.0971557	0.129625	0.125487	0.0966105	0.125918	0.110494	0.118501	0.12731	0.102846	0.069725	0.120344	0.121445	0.150738	0.139008	0.125118	0.109008	0.122148	0.123135	0.10367	0.140031	0.10854	0.0988309	0.127206	0.128773	0.107417	0.109042	0.066311	0.0920732	0.114126	0.0860578	0.0897041	0.111368	0.131505	0.112856	0.100192
0.65		0.112867	0.1092	0.142335	0.110003	0.0985668	0.116524	0.111608	0.106148	0.111188	0.106629	0.119969	0.125048	0.0981928	0.0996195	0.130433	0.125917	0.0983985	0.126986	0.110042	0.113861	0.125353	0.108428	0.0691026	0.12098	0.12362	0.157455	0.140056	0.125136	0.109644	0.120793	0.124628	0.106592	0.138431	0.112685	0.101593	0.127697	0.129917	0.111381	0.111272	0.0634457	0.0837043	0.113797	0.0903151	0.0939406	0.109542	0.135571	0.115897	0.103027
0.66		0.112314	0.113542	0.146148	0.109813	0.0998824	0.117501	0.112452	0.10763	0.112148	0.107999	0.120962	0.1301	0.10236	0.102922	0.131982	0.123011	0.098593	0.126371	0.115514	0.115661	0.125814	0.113698	0.0698024	0.119805	0.128968	0.160176	0.141418	0.126985	0.115645	0.118171	0.124621	0.102182	0.141107	0.115316	0.10864	0.127577	0.132161	0.110159	0.11554	0.0625315	0.0853977	0.117135	0.0923891	0.100996	0.108686	0.136771	0.122704	0.1064
0.67		0.11413	0.122737	0.149943	0.112806	0.100108	0.118032	0.115759	0.106927	0.115276	0.108284	0.120912	0.132177	0.105885	0.104259	0.134318	0.12575	0.0997176	0.127558	0.120925	0.115717	0.130188	0.117744	0.0706421	0.122638	0.133691	0.159984	0.136755	0.126486	0.121629	0.115116	0.12416	0.110194	0.146512	0.119	0.110297	0.128385	0.136378	0.108009	0.117172	0.0635431	0.0910976	0.120262	0.0931546	0.107964	0.109375	0.138403	0.125999	0.111168
0.68		0.116693	0.122449	0.15372	0.112106	0.105781	0.125515	0.118988	0.10772	0.12077	0.111646	0.119768	0.133277	0.108804	0.102182	0.13777	0.128626	0.10098	0.128365	0.124304	0.118368	0.128201	0.121605	0.0716529	0.125507	0.135345	0.158159	0.135708	0.125876	0.125158	0.111092	0.124898	0.105383	0.151207	0.127658	0.1126	0.131205	0.138008	0.109102	0.118959	0.0675655	0.0904328	0.122498	0.0945503	0.114872	0.11039	0.135511	0.12859	0.112663
0.69		0.11844	0.13352	0.155213	0.10794	0.107036	0.128997	0.122392	0.106831	0.127246	0.114103	0.123835	0.135868	0.109829	0.103419	0.140342	0.130937	0.101652	0.129605	0.126063	0.118684	0.124689	0.12415	0.0724246	0.125765	0.141686	0.157554	0.134887	0.125816	0.126099	0.117352	0.128559	0.112817	0.155811	0.13623	0.115335	0.13174	0.137855	0.111015	0.123007	0.0651741	0.0881581	0.123791	0.0968204	0.121277	0.111671	0.132409	0.124946	0.115375
0.7		0.123818	0.140339	0.158093	0.112643	0.110425	0.129032	0.130686	0.113132	0.131384	0.117303	0.125229	0.139496	0.111347	0.0948004	0.143586	0.138455	0.103184	0.13217	0.125399	0.12009	0.126612	0.12681	0.0729672	0.126586	0.145777	0.160172	0.136704	0.121314	0.126595	0.115213	0.13195	0.111315	0.161098	0.140531	0.11815	0.135629	0.135981	0.111788	0.127759	0.0669462	0.089438	0.124325	0.100536	0.127303	0.114067	0.128803	0.124215	0.122291
0.71		0.124206	0.146134	0.163663	0.11687	0.111961	0.127877	0.133674	0.114857	0.130676	0.112319	0.128264	0.142712	0.116777	0.102957	0.148167	0.142097	0.103816	0.124874	0.123678	0.127326	0.127402	0.132507	0.0731229	0.132788	0.149605	0.161653	0.140651	0.115333	0.132148	0.113589	0.131089	0.113718	0.167398	0.144831	0.120759	0.141637	0.136313	0.112711	0.132948	0.0681223	0.0955958	0.125494	0.104594	0.132503	0.115008	0.125714	0.126625	0.123859
0.72		0.124485	0.153879	0.165761	0.116026	0.114342	0.13127	0.136773	0.115594	0.140317	0.114603	0.131776	0.14052	0.121668	0.0989532	0.143728	0.141126	0.111387	0.120751	0.126106	0.135029	0.1266	0.138203	0.073905	0.139082	0.158623	0.162523	0.143055	0.110761	0.13647	0.108153	0.131253	0.114363	0.165757	0.148508	0.123918	0.147774	0.138532	0.117157	0.138482	0.0705836	0.103253	0.12698	0.108417	0.137603	0.113282	0.127282	0.129054	0.12496
0.73		0.125574	0.157987	0.167179	0.118849	0.122941	0.132411	0.14095	0.117485	0.139387	0.117186	0.13288	0.140389	0.12606	0.102696	0.145478	0.140015	0.114004	0.125724	0.128294	0.133301	0.130525	0.141215	0.074637	0.140586	0.167846	0.165819	0.140965	0.11047	0.13473	0.115698	0.135045	0.114668	0.16788	0.152087	0.125837	0.15166	0.141603	0.119952	0.142382	0.0686905	0.107862	0.129759	0.109918	0.142649	0.117525	0.131724	0.135013	0.129553
0.74		0.124227	0.159341	0.169246	0.122511	0.130332	0.131418	0.143535	0.116393	0.134971	0.129091	0.134527	0.142718	0.132092	0.103846	0.14619	0.138228	0.114253	0.132532	0.129824	0.131189	0.132645	0.144102	0.0746722	0.14143	0.174689	0.168921	0.143044	0.113761	0.140275	0.116523	0.134931	0.109979	0.171588	0.156782	0.127456	0.150553	0.142445	0.123858	0.144437	0.0653572	0.110532	0.131891	0.111535	0.147791	0.12164	0.1306	0.133086	0.130884
0.75		0.126067	0.16184	0.169393	0.125776	0.135934	0.133755	0.14663	0.117285	0.139183	0.127071	0.135656	0.146034	0.138044	0.103689	0.1438	0.141053	0.122679	0.130756	0.130128	0.131108	0.13042	0.151283	0.0750843	0.143977	0.178659	0.171669	0.148578	0.117737	0.143863	0.116308	0.140487	0.110212	0.177159	0.161917	0.130347	0.15484	0.144609	0.128683	0.146923	0.0701598	0.105929	0.133147	0.113266	0.15221	0.123799	0.132745	0.136388	0.129024
0.76		0.12792	0.165406	0.168683	0.125544	0.138989	0.136055	0.150147	0.118777	0.143863	0.129616	0.1341	0.146798	0.14252	0.106226	0.141783	0.142852	0.121088	0.117518	0.128314	0.131205	0.12835	0.159035	0.0756876	0.148425	0.190929	0.173259	0.154518	0.119913	0.145624	0.116896	0.141918	0.111872	0.185096	0.166891	0.133599	0.157966	0.145936	0.12968	0.151165	0.0711346	0.114395	0.136856	0.114716	0.155128	0.127967	0.135679	0.140496	0.131795
0.77		0.132741	0.170838	0.169369	0.12586	0.14126	0.136193	0.153723	0.122734	0.143464	0.134389	0.133788	0.145003	0.146685	0.108403	0.139724	0.149153	0.123064	0.132616	0.130366	0.129807	0.131761	0.16326	0.0764071	0.153218	0.198333	0.174656	0.155544	0.119323	0.146855	0.125944	0.143287	0.114676	0.187833	0.171745	0.136042	0.158934	0.145191	0.13123	0.152382	0.0743159	0.119177	0.141456	0.116292	0.159268	0.13237	0.137258	0.136034	0.131513
0.78		0.136612	0.173082	0.168221	0.126968	0.143932	0.140223	0.155739	0.129535	0.139779	0.137729	0.133661	0.14575	0.150582	0.108684	0.14247	0.153561	0.122571	0.135519	0.136682	0.130255	0.135942	0.166663	0.0763938	0.157568	0.203323	0.180114	0.14966	0.123357	0.151048	0.127287	0.14782	0.117376	0.187999	0.176495	0.139663	0.158653	0.150922	0.13562	0.15392	0.0751641	0.124685	0.138238	0.118381	0.164029	0.136491	0.141227	0.140284	0.13277
0.79		0.139978	0.174165	0.16541	0.126622	0.148319	0.144811	0.157506	0.133295	0.136776	0.141096	0.134024	0.149769	0.155883	0.116963	0.14718	0.160674	0.122267	0.127283	0.14121	0.134765	0.140349	0.171827	0.0758787	0.1639	0.208927	0.185782	0.152816	0.127817	0.155912	0.135989	0.152977	0.116969	0.18752	0.181105	0.145776	0.158481	0.152886	0.144041	0.158917	0.0775703	0.134354	0.138131	0.120125	0.169222	0.139885	0.143622	0.140206	0.138339
0.8		0.142976	0.18265	0.16444	0.128406	0.154415	0.152605	0.159734	0.137848	0.14707	0.141897	0.141191	0.157344	0.160705	0.117757	0.148474	0.169665	0.122418	0.147484	0.146349	0.138261	0.138763	0.177613	0.0757154	0.167705	0.223435	0.191749	0.152138	0.130542	0.160723	0.133902	0.15921	0.115731	0.186534	0.183591	0.147321	0.163598	0.152868	0.147731	0.159427	0.0809612	0.138993	0.145212	0.121652	0.174412	0.142736	0.14476	0.141787	0.14434
0.81		0.143986	0.179676	0.166471	0.133668	0.154747	0.1583	0.163337	0.138845	0.145227	0.14795	0.144016	0.155815	0.163108	0.124007	0.154028	0.174866	0.127587	0.154353	0.150161	0.134304	0.14337	0.181754	0.0745783	0.172508	0.234744	0.194118	0.156269	0.134774	0.165885	0.149313	0.163293	0.118336	0.184785	0.180709	0.150537	0.168789	0.158839	0.15255	0.156354	0.0858606	0.146098	0.145905	0.129881	0.179595	0.14475	0.144234	0.143173	0.145806
0.82		0.142138	0.193863	0.172986	0.140013	0.150317	0.159677	0.171639	0.138752	0.144471	0.145228	0.145283	0.160949	0.165426	0.134602	0.157387	0.176294	0.134656	0.153436	0.148801	0.125988	0.151253	0.185071	0.0724267	0.179078	0.240684	0.195972	0.160811	0.140044	0.169449	0.151325	0.16644	0.12217	0.182001	0.17903	0.154053	0.171183	0.16182	0.158511	0.153113	0.0876686	0.152872	0.142225	0.13626	0.181655	0.148657	0.144125	0.142159	0.150999
0.83		0.14762	0.197714	0.175241	0.146336	0.157838	0.170372	0.175167	0.142493	0.14725	0.152785	0.152376	0.169261	0.167674	0.1374	0.158731	0.190576	0.139079	0.162579	0.152907	0.131933	0.155474	0.190529	0.0758316	0.185165	0.251749	0.201799	0.165281	0.148081	0.174634	0.161882	0.169929	0.121396	0.193298	0.184714	0.163314	0.170236	0.166393	0.165799	0.151907	0.0930836	0.156765	0.146468	0.139291	0.182308	0.152952	0.145944	0.146864	0.150432
0.84		0.15223	0.200056	0.177334	0.147831	0.161267	0.181182	0.179438	0.145947	0.151196	0.154485	0.152939	0.17671	0.171539	0.136246	0.159249	0.207533	0.144885	0.17341	0.157063	0.114471	0.161014	0.197453	0.0784237	0.202501	0.265289	0.207138	0.169278	0.15445	0.186471	0.176241	0.173689	0.128555	0.195901	0.190397	0.166703	0.180773	0.175575	0.177027	0.154007	0.0985609	0.166461	0.151216	0.140587	0.192164	0.157095	0.148875	0.148174	0.153192
0.85		0.156094	0.211223	0.18128	0.146357	0.159727	0.185347	0.185209	0.151132	0.158291	0.156126	0.157943	0.176851	0.175323	0.13977	0.165944	0.214765	0.152235	0.184627	0.159737	0.116086	0.166926	0.20025	0.07912	0.203421	0.280371	0.211959	0.161	0.159293	0.192652	0.168655	0.17788	0.136059	0.193467	0.190265	0.167771	0.189395	0.186326	0.190038	0.16324	0.105338	0.178696	0.15358	0.141314	0.200522	0.157704	0.159025	0.147215	0.157992
0.86		0.160284	0.218081	0.186692	0.153163	0.161814	0.193717	0.188414	0.157309	0.166936	0.161476	0.166165	0.182287	0.178128	0.145698	0.169143	0.217523	0.159802	0.194142	0.168421	0.127498	0.169541	0.199272	0.0776968	0.216536	0.296008	0.212913	0.175643	0.163881	0.19747	0.183262	0.184439	0.131327	0.192111	0.190105	0.170817	0.197047	0.193357	0.204549	0.162555	0.110343	0.178954	0.157552	0.14234	0.206151	0.158303	0.163769	0.143119	0.165111
0.87		0.164396	0.220499	0.192863	0.147898	0.173593	0.202471	0.193976	0.166389	0.162091	0.163149	0.169991	0.188914	0.184168	0.145945	0.173107	0.230656	0.168631	0.205554	0.173634	0.133376	0.173076	0.203504	0.0770678	0.22906	0.310441	0.215517	0.182672	0.168902	0.202637	0.194399	0.188954	0.138964	0.197717	0.193394	0.173859	0.204036	0.198176	0.220487	0.16953	0.111337	0.193989	0.163334	0.144215	0.210202	0.161396	0.17119	0.149415	0.174819
0.88		0.168447	0.229559	0.199905	0.156669	0.17072	0.204716	0.200066	0.177635	0.167425	0.175071	0.172147	0.194324	0.192789	0.159531	0.17895	0.242993	0.176385	0.21703	0.17708	0.127127	0.179725	0.214067	0.079221	0.23623	0.320872	0.227531	0.188669	0.174715	0.214951	0.203664	0.189489	0.135381	0.206936	0.197318	0.175606	0.210662	0.207858	0.231787	0.178893	0.12299	0.198661	0.171477	0.146943	0.213886	0.165388	0.181829	0.149067	0.181751
0.89		0.172783	0.234218	0.207329	0.163288	0.177767	0.213	0.206148	0.183917	0.170446	0.179124	0.187281	0.201322	0.20016	0.165394	0.186231	0.253156	0.188228	0.227198	0.183488	0.121793	0.186844	0.222436	0.0796289	0.259391	0.326263	0.236122	0.195622	0.181299	0.225546	0.209336	0.194073	0.153532	0.210276	0.199127	0.176822	0.219395	0.223287	0.248737	0.179912	0.129052	0.208114	0.179781	0.153568	0.224753	0.171332	0.192288	0.146866	0.18715
0.9		0.176094	0.233401	0.215082	0.173415	0.190201	0.230608	0.212212	0.183125	0.171991	0.179597	0.197645	0.210477	0.205783	0.178623	0.197596	0.271658	0.196483	0.241565	0.189885	0.136255	0.194811	0.227221	0.0798807	0.268754	0.327349	0.24202	0.202861	0.189537	0.238221	0.218455	0.208369	0.148684	0.217665	0.200017	0.178487	0.227146	0.236578	0.271958	0.200819	0.131183	0.213402	0.178659	0.159612	0.232611	0.182219	0.198037	0.152923	0.191753
0.91		0.172755	0.245394	0.224208	0.180828	0.19832	0.237758	0.222439	0.184356	0.177558	0.188105	0.206947	0.219698	0.205849	0.195673	0.206896	0.290981	0.210122	0.256153	0.194799	0.150087	0.20418	0.23402	0.0821774	0.299974	0.330118	0.2525	0.212867	0.203013	0.25579	0.234174	0.218896	0.15791	0.229321	0.199688	0.184145	0.235426	0.242463	0.283155	0.209599	0.144727	0.214766	0.183628	0.162591	0.235709	0.193988	0.201651	0.157712	0.19619
0.92		0.177369	0.253454	0.23732	0.192071	0.206262	0.246402	0.235387	0.194365	0.185367	0.189399	0.236207	0.228781	0.212114	0.215008	0.216505	0.317995	0.225049	0.269954	0.19699	0.145389	0.212213	0.245313	0.085065	0.312878	0.333237	0.262836	0.227159	0.217962	0.271849	0.238237	0.233476	0.159565	0.241001	0.198385	0.194852	0.247948	0.259531	0.284586	0.219673	0.148836	0.237205	0.199855	0.165821	0.245635	0.20189	0.204638	0.160743	0.202468
0.93		0.189123	0.279503	0.254365	0.20161	0.219969	0.267508	0.248628	0.205068	0.192391	0.206208	0.248667	0.239429	0.223313	0.238396	0.229894	0.35166	0.242734	0.286788	0.211289	0.178257	0.222982	0.255384	0.0881083	0.305868	0.335405	0.271727	0.256525	0.235133	0.288572	0.248701	0.256551	0.183105	0.254322	0.200577	0.213745	0.267788	0.276811	0.274783	0.2391	0.173699	0.238251	0.215591	0.169086	0.257175	0.196437	0.216809	0.167934	0.216903
0.94		0.20289	0.285228	0.257008	0.222951	0.228593	0.280791	0.254085	0.227394	0.197475	0.217151	0.274362	0.249547	0.234878	0.267938	0.252249	0.398519	0.26077	0.29562	0.22211	0.199608	0.239269	0.261611	0.0892391	0.280051	0.36623	0.290147	0.285208	0.270405	0.308702	0.265202	0.282162	0.196972	0.277552	0.207707	0.228582	0.277493	0.295928	0.251463	0.261731	0.167976	0.206196	0.231057	0.170373	0.25835	0.212981	0.238294	0.182892	0.23177
0.95		0.221648	0.29831	0.258795	0.252583	0.235733	0.309478	0.262375	0.241201	0.201449	0.25411	0.30388	0.265894	0.244429	0.300054	0.270491	0.371955	0.296457	0.296532	0.230111	0.243849	0.240143	0.26715	0.0901327	0.225304	0.364292	0.314045	0.310539	0.294065	0.340088	0.292981	0.291797	0.206786	0.289875	0.213412	0.242529	0.287456	0.324411	0.187389	0.27902	0.203614	0.172104	0.233082	0.17619	0.256375	0.233537	0.257261	0.190906	0.238505
0.96		0.241186	0.294557	0.260156	0.282416	0.244811	0.312408	0.274118	0.245948	0.217128	0.277249	0.315877	0.268548	0.246913	0.322349	0.293538	0.299017	0.3101	0.318323	0.245032	0.268121	0.263531	0.269429	0.0908246	0.153852	0.337403	0.323065	0.332866	0.306116	0.374874	0.330527	0.342398	0.231246	0.289524	0.215355	0.265766	0.302962	0.358175	0.128995	0.289328	0.235504	0.134937	0.236364	0.187818	0.250105	0.239599	0.253711	0.21355	0.260757
0.97		0.24683	0.272862	0.241874	0.303338	0.229686	0.335469	0.286915	0.274069	0.2265	0.300829	0.326809	0.248326	0.249957	0.334194	0.315467	0.177788	0.351705	0.335416	0.26319	0.2999	0.293799	0.27027	0.0795465	0.112135	0.296475	0.321378	0.34274	0.312737	0.386671	0.345519	0.360417	0.267301	0.275432	0.216372	0.287573	0.309915	0.389806	0.0822331	0.303322	0.258293	0.0939768	0.246587	0.196747	0.220595	0.249113	0.270602	0.215155	0.286879
0.98		0.250429	0.233743	0.224155	0.285985	0.193382	0.339298	0.293106	0.318632	0.2137	0.316021	0.31265	0.231385	0.253443	0.353185	0.295935	0.0956289	0.365291	0.342077	0.277021	0.30977	0.273487	0.257562	0.0677955	0.0807615	0.249981	0.299987	0.310036	0.304211	0.368392	0.347801	0.359646	0.297001	0.239452	0.211379	0.317913	0.286402	0.416489	0.0557441	0.309995	0.29431	0.0713327	0.244675	0.199783	0.184201	0.252278	0.267519	0.225705	0.313304
0.99		0.199102	0.203986	0.210078	0.217508	0.149888	0.311775	0.280925	0.290857	0.198022	0.300472	0.282347	0.200945	0.241777	0.348532	0.266561	0.0666752	0.371196	0.304349	0.27771	0.305135	0.201637		0.0555241	0.0411955	0.206951	0.143198	0.246014	0.268305	0.354593	0.269791	0.22858	0.319715	0.180857		0.33584	0.232793	0.404516	0.0433405	0.278532	0.287251	0.0548126	0.231949	0.18262	0.0627474	0.224754	0.227841	0.173287	0.31271
1		0.163674	0.174859						0.174672	0.176957	0.291537								0.223159	0.263843				0.0368753							5.46168e-06		0						8.60922e-07							3.71348e-06
[truncated: 50 more columns]

## Sheet: delta LDT single cell dist.
X-axis (normalized cell length		FDAA distribution
0
0.01		0.0186086	0.0157169		0.0104929	0.013138	0.00182148		0.0289378	0.000440861		0.00933536	0.0120135			0.0045776			0.0112088	0.000696821		0.0376067	0.0135305	0.000411605	0.000326517		0.00459075	0.0118156				0.0116419	0.0382973			0.000136313	0.00465929	0.000253118		0.00165349	0.00606623
0.02		0.0199264	0.0183137	0.0104976	0.0519661	0.0181993	0.0351553		0.0285048	0.0136492	0.00887022	0.0145429	0.0138822	0.00852872	0.00113742	0.00902664	0	0.0090514	0.0185195	0.00313128		0.0335851	0.0268159	0.00162541	0.00221463	0.00271965	0.00696037	0.022244	0.0189764	0.0133159	0.0132785	0.0166582	0.0456109	0.00736374	0.00345388	0.00110052	0.0110868	0.00143412	0.00851532	0.0026287	0.0143644
0.03		0.0187706	0.0182431	0.0122488	0.0489985	0.0214252	0.047044		0.0237193	0.0222562	0.00981549	0.0171724	0.015378	0.00925783	0.00297766	0.0116157	0	0.0101801	0.0208052	0.00672217	0.0159837	0.0261464	0.0310028	0.00306705	0.00556025	0.0075668	0.00904664	0.0258433	0.0225564	0.0159279	0.0151061	0.0190583	0.0429294	0.00850021	0.00602103	0.00213211	0.0151981	0.003375	0.0108942	0.00368263	0.018074
0.04		0.0177177	0.0207159	0.0127335	0.0433085	0.0249966	0.0484389		0.0250736	0.0269316	0.0103871	0.0166883	0.0171125	0.0109553	0.00374678	0.0124607	0.000155837	0.010644	0.0216212	0.0100141	0.0177433	0.023753	0.0285652	0.0042645	0.00860171	0.0119985	0.00976808	0.0277241	0.0255898	0.017051	0.017631	0.0215121	0.0406269	0.0100554	0.00953953	0.00462772	0.0176298	0.00681292	0.0180356	0.00614443	0.0190984
0.05		0.017283	0.0230514	0.0163741	0.0374595	0.0276239	0.0451694		0.0246527	0.0328732	0.0102663	0.0182953	0.0189394	0.0122872	0.00477976	0.0122687	0.000697678	0.0101732	0.0223649	0.0134568	0.0187332	0.0203584	0.0238296	0.00529182	0.00925108	0.0153493	0.0116657	0.0301955	0.0272757	0.016876	0.018748	0.0244804	0.0354935	0.0120252	0.0138224	0.00806238	0.0221201	0.0135737	0.0214963	0.00957722	0.0222676
0.06		0.0177349	0.024355	0.0190306	0.0363693	0.028122	0.0401289		0.0261419	0.0324725	0.0104374	0.0202708	0.0199322	0.0128344	0.00624944	0.0118849	0.00216207	0.00963832	0.0254279	0.0159276	0.0190862	0.0219497	0.0226278	0.00662689	0.0101926	0.0164492	0.0123212	0.0340967	0.0265587	0.0172599	0.0187996	0.0269991	0.0314201	0.0142246	0.0187367	0.0122792	0.0267016	0.0192893	0.0242378	0.0122938	0.0245662
0.07		0.0173587	0.025351	0.0178129	0.0352417	0.0289884	0.0351486		0.0264734	0.035644	0.0108483	0.0208323	0.0212484	0.0136557	0.00904791	0.0118939	0.00644142	0.011353	0.0284486	0.0182749	0.0191536	0.0214306	0.0214397	0.00744303	0.0121386	0.0166206	0.0119335	0.0390055	0.0274289	0.0178237	0.0204942	0.0273118	0.0301409	0.0165237	0.022238	0.0167786	0.0265783	0.0254389	0.0281883	0.0143516	0.0247524
0.08		0.0171312	0.0267029	0.0186075	0.0337558	0.0310495	0.0305584		0.0257986	0.039054	0.0112846	0.0204282	0.0228003	0.0143564	0.0120911	0.010219	0.00752926	0.0111072	0.0307674	0.0183871	0.0186013	0.0261392	0.0209105	0.00786048	0.0130153	0.0170514	0.0141759	0.0413388	0.0291275	0.01789	0.0214449	0.0287444	0.0313015	0.017573	0.0238176	0.0228442	0.0295183	0.0246651	0.0288541	0.0157419	0.0254807
0.09		0.0170221	0.0275056	0.0193327	0.035885	0.0320619	0.0268683		0.0264506	0.0396612	0.0117296	0.0205751	0.024123	0.014544	0.0152248	0.0100123	0.0101197	0.0115249	0.0346837	0.0225928	0.0180824	0.0253902	0.0214285	0.00782274	0.0140337	0.0180301	0.0137879	0.0421963	0.0306754	0.018299	0.0214698	0.030491	0.028374	0.018506	0.0265966	0.0278305	0.0311061	0.0254729	0.0277135	0.0160822	0.0263687
0.1		0.0165175	0.0269973	0.019525	0.0375541	0.0305484	0.0253732		0.0269946	0.0401236	0.0109861	0.0214264	0.0244657	0.0150565	0.0175731	0.00988988	0.0121718	0.0122937	0.0383377	0.0200714	0.0179444	0.0265956	0.021585	0.00777511	0.0152315	0.0194924	0.0143919	0.0464237	0.0320809	0.019371	0.0226665	0.0314942	0.0265658	0.0199309	0.0298699	0.0305624	0.0319582	0.0265866	0.026841	0.0189471	0.027562
0.11		0.0160769	0.0273212	0.0200975	0.0378633	0.0320722	0.0247821		0.0273926	0.0395825	0.0104459	0.0237914	0.0239835	0.0157159	0.0198668	0.010232	0.0130782	0.0115247	0.0403145	0.022039	0.0178065	0.0273755	0.0206061	0.00780876	0.0164298	0.0218826	0.015175	0.0454494	0.0335547	0.0202293	0.0232915	0.0317989	0.025843	0.0209519	0.0276818	0.0335764	0.0340903	0.0278652	0.0254726	0.0212092	0.0284665
0.12		0.0161624	0.0278705	0.0207065	0.0407209	0.0313963	0.0236837		0.0286286	0.0396127	0.0116775	0.0235174	0.0245979	0.016455	0.0230383	0.011045	0.0134004	0.0125786	0.0415432	0.022201	0.0173738	0.0249315	0.0211782	0.00794698	0.0174772	0.0230315	0.0142988	0.0532696	0.0348315	0.0194768	0.0224777	0.0317973	0.025915	0.0208204	0.0293534	0.0350695	0.0337746	0.0283159	0.0236508	0.0208206	0.0276222
0.13		0.0180191	0.0286635	0.0213245	0.0412558	0.0320026	0.0223109		0.0291851	0.0411072	0.0122617	0.0252258	0.0256599	0.0163099	0.0250205	0.00975589	0.0138843	0.0119666	0.04263	0.0227201	0.016888	0.0269124	0.0177927	0.00796175	0.0166197	0.0219108	0.0150669	0.0518925	0.0349479	0.0186815	0.0229566	0.0322337	0.0262731	0.0213022	0.0300107	0.0359014	0.0347452	0.0319562	0.0226737	0.0210963	0.0297249
0.14		0.0175567	0.029482	0.0215051	0.0434918	0.0334618	0.0220173		0.0297573	0.0423018	0.0115577	0.0261285	0.0271723	0.0156952	0.0261997	0.00927184	0.0140988	0.0120459	0.0427424	0.0237683	0.0164548	0.0262809	0.0187532	0.00808298	0.0175702	0.0214314	0.0153938	0.0553299	0.0345633	0.0184894	0.0237891	0.032495	0.0261896	0.0225617	0.0300325	0.0367069	0.0355849	0.0297081	0.0231251	0.0225201	0.0302222
0.15		0.0166719	0.0297605	0.022028	0.0463668	0.0343705	0.0205018		0.0300988	0.0423087	0.01096	0.0252965	0.0279519	0.0168424	0.0273927	0.00930622	0.0154597	0.0118024	0.0419069	0.023866	0.0160546	0.0288356	0.0169955	0.00830976	0.0174567	0.021514	0.0156317	0.0598727	0.0362241	0.0191769	0.0245089	0.0326428	0.0262223	0.0226362	0.0300167	0.0383491	0.0330403	0.0296423	0.0258912	0.0230639	0.0308353
0.16		0.0161979	0.0290583	0.0227559	0.047823	0.0326428	0.0208717		0.0304911	0.0414447	0.0104572	0.0250874	0.0288848	0.0173521	0.0289779	0.00996288	0.0160322	0.0114383	0.042794	0.0243676	0.015732	0.0282547	0.015888	0.00869305	0.0173415	0.0231331	0.0161557	0.0584064	0.0374945	0.0202308	0.0246343	0.0327992	0.0265246	0.0219836	0.0304145	0.0407531	0.0336555	0.03107	0.0245866	0.0219281	0.0327722
0.17		0.0167769	0.0278045	0.0227125	0.0495652	0.0335366	0.0228779		0.0317043	0.0396782	0.0101814	0.0256432	0.0300277	0.0172285	0.0310307	0.0102926	0.0165559	0.0134143	0.0437599	0.0254609	0.0155374	0.0279185	0.0150679	0.00853767	0.0181176	0.0241936	0.0154358	0.0644318	0.0373088	0.0201706	0.024502	0.0329431	0.0266886	0.0219456	0.0307482	0.0386523	0.0328885	0.0332237	0.0231063	0.0233021	0.0343052
0.18		0.0166494	0.0273337	0.0232984	0.0486037	0.0343331	0.0227307		0.0296164	0.042595	0.00999371	0.0247883	0.0310201	0.0169354	0.0303844	0.00947813	0.0172189	0.0131617	0.0454943	0.0270344	0.0154647	0.0294821	0.0177604	0.00838476	0.0190566	0.0249021	0.015623	0.0632789	0.0353729	0.0203784	0.0256918	0.0330854	0.0260588	0.0220683	0.0319558	0.0390536	0.0322473	0.030835	0.0250086	0.0242687	0.0340454
0.19		0.015728	0.0284711	0.0242223	0.046212	0.0353973	0.0224657		0.0310402	0.0411298	0.0105931	0.0256327	0.0309791	0.016721	0.0298182	0.010234	0.0171101	0.0145189	0.0466661	0.0270749	0.0161151	0.0308366	0.0142613	0.00860189	0.0185375	0.0256779	0.0155447	0.0665956	0.0328784	0.0212272	0.0262367	0.0337756	0.0282189	0.0234311	0.0331772	0.0393893	0.0355515	0.0318822	0.0247921	0.0243498	0.03313
0.2		0.0163422	0.0282921	0.0248759	0.0447892	0.0360365	0.0220784		0.0315827	0.0420838	0.0111377	0.0266004	0.0292941	0.0166405	0.0303344	0.0106858	0.0186593	0.0148512	0.0451554	0.0260039	0.0167656	0.0288533	0.0149897	0.00785375	0.0198476	0.0256032	0.0143702	0.0723544	0.0354616	0.0226625	0.0261104	0.0350436	0.0274285	0.0247678	0.0332909	0.0393303	0.0348792	0.031554	0.0233525	0.0235979	0.0351163
0.21		0.0169268	0.027671	0.0256248	0.0466452	0.034957	0.0217253		0.0299628	0.0433728	0.0104792	0.0263612	0.0289445	0.0168522	0.0296055	0.0107393	0.017531	0.0147064	0.04684	0.0281675	0.0165881	0.0283002	0.014745	0.00791987	0.0193632	0.0244777	0.0162459	0.0753164	0.0357889	0.0227303	0.0259857	0.0369097	0.0279167	0.0257131	0.032586	0.0398046	0.0333842	0.0331424	0.0243568	0.0243629	0.0342602
0.22		0.017353	0.0277657	0.0264527	0.0476059	0.0348713	0.0227443		0.0309111	0.0428797	0.0102081	0.0254905	0.0289832	0.0173771	0.0287391	0.0102812	0.018289	0.0151196	0.0450806	0.0267547	0.0163261	0.0298594	0.0143348	0.00886635	0.0199606	0.0242819	0.0162881	0.0768171	0.0348911	0.0222706	0.0258173	0.03596	0.0290972	0.026017	0.033706	0.0423608	0.0322809	0.0307535	0.024626	0.0248506	0.0365291
0.23		0.0170959	0.0286593	0.0274069	0.0470474	0.0355068	0.0232498		0.0306892	0.042059	0.0108975	0.0264611	0.0293581	0.0185342	0.0297074	0.00964292	0.0197915	0.0140243	0.04419	0.0281981	0.0163306	0.029334	0.0151249	0.00855201	0.0193419	0.0245815	0.0159983	0.0791377	0.0354748	0.0220442	0.025561	0.0353544	0.0271783	0.0249387	0.0337105	0.0414582	0.033465	0.0310914	0.0239376	0.0250724	0.0367155
0.24		0.0179156	0.0295845	0.0272555	0.0442008	0.0356623	0.0229226		0.0263742	0.0411431	0.0111006	0.0257748	0.0299487	0.0179907	0.0300993	0.00945294	0.0201457	0.016293	0.0445553	0.0257362	0.0164647	0.0297609	0.0149532	0.00844182	0.0197269	0.02579	0.0163115	0.0825753	0.0365546	0.0223508	0.0246202	0.0353166	0.0286629	0.0249643	0.0327682	0.0409109	0.0337153	0.0329174	0.0241682	0.0251765	0.0364782
0.25		0.0185512	0.0306559	0.0269014	0.0438095	0.0362539	0.0217012		0.0292325	0.0439305	0.0107655	0.0276128	0.030218	0.0173419	0.0301094	0.00841257	0.0188614	0.0163395	0.0444537	0.0250892	0.0165722	0.0280207	0.0165413	0.00852588	0.0219094	0.0262336	0.0151904	0.0837442	0.0360647	0.0232324	0.0240221	0.0344258	0.0299865	0.0261368	0.033371	0.039526	0.0339938	0.0322762	0.0249957	0.0260714	0.035733
0.26		0.0177718	0.0306213	0.0269684	0.0417039	0.0376419	0.0229901		0.0292032	0.0425543	0.0113357	0.0277841	0.0295552	0.0189051	0.0308783	0.00766984	0.0195388	0.0158053	0.0449839	0.0247149	0.0166457	0.0324494	0.0172847	0.00889564	0.0223	0.0263696	0.0160693	0.08232	0.0350153	0.0217195	0.026263	0.0339813	0.0302452	0.0263241	0.0344311	0.0399863	0.0339494	0.0328264	0.0271871	0.0249225	0.0341254
0.27		0.0183191	0.0308017	0.0264427	0.0412064	0.0335668	0.0233293		0.0271599	0.0423423	0.0123674	0.0278774	0.0298853	0.0189601	0.0310788	0.00762039	0.0194321	0.0159784	0.039944	0.0244013	0.0167894	0.0304301	0.0178042	0.00895596	0.0225531	0.026841	0.016357	0.0823947	0.0357086	0.0217245	0.02545	0.0343841	0.0296211	0.0260129	0.0330596	0.0396161	0.0325049	0.0341947	0.0273895	0.0253629	0.0333767
0.28		0.0185532	0.0309569	0.0262795	0.0421239	0.0348479	0.0227087		0.0260452	0.0424522	0.0124633	0.0287692	0.0302546	0.0181643	0.0306138	0.00786892	0.0202862	0.016995	0.0390529	0.0239252	0.0172083	0.0330562	0.0175312	0.00893524	0.0200468	0.0265074	0.0149703	0.0830029	0.0352784	0.0218196	0.0224779	0.0338632	0.0292432	0.0251046	0.0349243	0.0397561	0.0329693	0.0335374	0.0264855	0.0275113	0.0335411
0.29		0.0179901	0.0320274	0.0270585	0.0394981	0.0345838	0.0210626		0.0255286	0.0419831	0.0124044	0.0298933	0.0297191	0.0177377	0.0304739	0.00805674	0.0204151	0.017336	0.0378208	0.0229488	0.0176273	0.0291641	0.0184594	0.0089111	0.0207569	0.0254218	0.0156644	0.0837122	0.0341087	0.0211823	0.0230657	0.0335799	0.0287156	0.0240931	0.0348436	0.0401094	0.0331515	0.0328191	0.0272488	0.0253914	0.0316786
0.3		0.0190998	0.0318229	0.0268789	0.0410218	0.0338252	0.0217879		0.0258055	0.0439826	0.0126085	0.0302706	0.0302263	0.0172841	0.0304013	0.00836873	0.0207194	0.0181475	0.0388575	0.0229039	0.0176054	0.0320397	0.0187668	0.00770506	0.0201735	0.0266958	0.0151525	0.0847358	0.0337371	0.0194926	0.0235897	0.0341191	0.0294379	0.0250574	0.0348763	0.0404023	0.0334374	0.0315887	0.0281406	0.0265825	0.0329544
0.31		0.0199665	0.0298752	0.0262002	0.0398754	0.0343659	0.0219783		0.0269406	0.0440968	0.0127036	0.0291909	0.0308498	0.0168064	0.0303924	0.00907494	0.0215309	0.0180783	0.0417971	0.0231368	0.0175695	0.0295456	0.0190525	0.00772675	0.0206074	0.0271895	0.0152357	0.0826334	0.0341749	0.0225714	0.0240263	0.0332446	0.0301157	0.0258827	0.0355056	0.0408516	0.035408	0.0326774	0.0292156	0.0271676	0.0320758
0.32		0.0204623	0.029831	0.0249974	0.0379964	0.0367645	0.0222903		0.0283136	0.0402914	0.0124236	0.0292102	0.0300401	0.0174645	0.0305588	0.00997477	0.0202803	0.0189612	0.0412756	0.0224286	0.0176352	0.0297322	0.0200483	0.00875105	0.0224213	0.0258623	0.0163231	0.0802551	0.0332038	0.0216953	0.0219138	0.0324907	0.0297776	0.0260687	0.036086	0.0434663	0.0331148	0.0332944	0.0310504	0.026657	0.0323959
0.33		0.0198888	0.0296625	0.0266392	0.0371258	0.0335181	0.023544		0.0286845	0.041483	0.0123355	0.0305959	0.0298835	0.0179244	0.030574	0.0103733	0.0209791	0.0210561	0.0389543	0.0226055	0.0177379	0.027084	0.0198837	0.00839535	0.0190842	0.0267371	0.016086	0.0813001	0.0321903	0.0204028	0.0204542	0.0330216	0.0276957	0.0260722	0.0340278	0.042062	0.0347946	0.0317708	0.0325203	0.0279233	0.033957
0.34		0.0197559	0.0299229	0.0269822	0.0360502	0.0340346	0.0243254		0.0291546	0.0415956	0.0125249	0.0306911	0.0299803	0.0180708	0.029358	0.0103072	0.0207814	0.01967	0.0368991	0.0229508	0.0175239	0.029973	0.0211156	0.00846859	0.0185074	0.028502	0.0155676	0.0786592	0.0314402	0.0207477	0.0224725	0.0320696	0.0293744	0.0257366	0.0365897	0.0412625	0.0380382	0.0320773	0.0321059	0.0288534	0.0327133
0.35		0.0198997	0.0295942	0.025749	0.0350639	0.0343911	0.0242768		0.0289191	0.0432351	0.0127949	0.0303124	0.0294013	0.0173352	0.0294173	0.0102962	0.0198427	0.0190473	0.036788	0.0216859	0.0169876	0.0291144	0.0207761	0.00871561	0.0198188	0.0311811	0.0152815	0.0751952	0.0317085	0.020024	0.0221952	0.0309017	0.0298363	0.0257255	0.0350745	0.0426106	0.0341759	0.0305022	0.0321801	0.0279784	0.0313764
0.36		0.0201445	0.0299701	0.0261025	0.0347352	0.0330623	0.0236693		0.0274755	0.0428143	0.0131198	0.0333732	0.0295224	0.0171382	0.0303781	0.0111175	0.0187401	0.0183989	0.0359892	0.0214106	0.0166161	0.0286389	0.0199585	0.00888091	0.0193904	0.0313848	0.0152723	0.0741369	0.0313815	0.0200277	0.0209733	0.0307732	0.0307768	0.0260141	0.0338377	0.042691	0.0360051	0.0331258	0.0326157	0.0263941	0.0304712
0.37		0.0198996	0.0305976	0.0264318	0.0332368	0.0317617	0.0229614		0.0286203	0.0395213	0.0126899	0.033813	0.0300648	0.0183936	0.029972	0.0108687	0.0188083	0.0189548	0.0359184	0.0230908	0.0167112	0.0288705	0.0216099	0.00828669	0.0202855	0.0298958	0.0150309	0.070408	0.0308252	0.0200118	0.0218804	0.0298894	0.0322886	0.0279644	0.0341505	0.0398003	0.0382387	0.0299205	0.0349695	0.0292125	0.0323514
0.38		0.0195112	0.0308186	0.0266651	0.0318916	0.0351402	0.0246569		0.0294334	0.0417824	0.0120527	0.0325839	0.0300167	0.0189834	0.0300234	0.0124604	0.0208291	0.0202795	0.0356717	0.0225679	0.0168072	0.0288192	0.0203126	0.007982	0.0205408	0.0297741	0.015494	0.0677678	0.0314344	0.0197151	0.0218526	0.0291672	0.0299833	0.0306678	0.0325295	0.0369382	0.0398696	0.034131	0.0358154	0.027979	0.0325723
0.39		0.0191548	0.030857	0.026016	0.0314721	0.0323387	0.0249743		0.0291391	0.0426142	0.0123661	0.0327523	0.030351	0.01932	0.0306118	0.0137524	0.0192964	0.0210938	0.0363987	0.0214277	0.016935	0.0291014	0.0204331	0.00831311	0.0188453	0.03019	0.0152325	0.0644382	0.0308432	0.0191642	0.0209216	0.0311339	0.0304583	0.0298381	0.032704	0.0368246	0.040291	0.0283511	0.034785	0.027301	0.0325999
0.4		0.019727	0.031974	0.026588	0.0296941	0.0330097	0.0241516		0.0295588	0.0416225	0.0126884	0.0342235	0.0309838	0.0194811	0.0307092	0.0142362	0.0206416	0.021094	0.0380872	0.0243633	0.0170627	0.0287515	0.0214389	0.00776388	0.0192414	0.031354	0.0145493	0.0609388	0.0314636	0.0196653	0.020667	0.0313633	0.0318232	0.0285018	0.0348652	0.0366623	0.0407599	0.0293915	0.0349335	0.0279432	0.0322648
0.41		0.0192511	0.0347262	0.0273722	0.0279537	0.0352107	0.0237199		0.0303414	0.0415701	0.0128661	0.0350625	0.030652	0.0187388	0.0304872	0.0151556	0.0211029	0.0204008	0.0374477	0.0225094	0.0175065	0.0302557	0.021333	0.00772216	0.0184218	0.0322428	0.01532	0.0585836	0.0300331	0.0196409	0.0206316	0.0307021	0.033143	0.029418	0.0351686	0.0368873	0.0408683	0.0289726	0.0350227	0.029418	0.0315947
0.42		0.0174283	0.0350499	0.0246029	0.0273918	0.033516	0.0239496		0.0310302	0.039983	0.0129301	0.0348346	0.0301638	0.0179065	0.0297444	0.0166654	0.0194677	0.0219243	0.0357422	0.0244647	0.0180345	0.0281718	0.0196087	0.00812946	0.0167018	0.0328475	0.0151259	0.0568078	0.0296432	0.0185756	0.0209069	0.0313287	0.0334408	0.0301616	0.0342727	0.0375762	0.0401965	0.0305409	0.0343815	0.0262846	0.0329216
0.43		0.0168269	0.0334774	0.0252867	0.0276173	0.0342227	0.0241276		0.0308395	0.0417262	0.0127708	0.0365375	0.0295153	0.0201977	0.0311155	0.0159141	0.018643	0.0229518	0.0375224	0.0236975	0.0185467	0.0298067	0.0219226	0.00882724	0.0160873	0.032749	0.0142935	0.0540446	0.0306288	0.0171877	0.0206633	0.0306073	0.031535	0.0302407	0.0346809	0.0391955	0.0376821	0.0315993	0.0357662	0.026593	0.0328609
0.44		0.0168427	0.0334352	0.027161	0.0270123	0.0344969	0.0239615		0.0306236	0.0392593	0.0129094	0.0350341	0.0299026	0.0209975	0.0325197	0.0150724	0.020514	0.0223163	0.0370722	0.0232336	0.0190464	0.0289184	0.0240108	0.00865198	0.0155423	0.0322876	0.0136774	0.0513619	0.0314169	0.0167109	0.0205637	0.0289823	0.0324422	0.0302849	0.0370517	0.0400983	0.0417338	0.0304714	0.0376692	0.028997	0.0304667
0.45		0.0171995	0.035045	0.0271626	0.0260444	0.0342078	0.0228153		0.0334682	0.0413087	0.0133155	0.0365954	0.0301275	0.0206086	0.0313955	0.0143896	0.0174484	0.0216883	0.0361863	0.0250346	0.0191204	0.0271243	0.0227682	0.00831118	0.0152539	0.0316737	0.0150348	0.0493836	0.0303745	0.0183648	0.021737	0.0297633	0.0342625	0.0302715	0.0356695	0.0396594	0.0414287	0.0315398	0.0343219	0.0267518	0.0314328
0.46		0.0171613	0.0359847	0.0267572	0.0272019	0.034316	0.0246958		0.0328334	0.0404002	0.0131146	0.0377957	0.0301032	0.0213189	0.0301209	0.0138064	0.0183293	0.0217576	0.0359208	0.0232471	0.0182832	0.0263931	0.020877	0.00834476	0.0161129	0.0315525	0.0143709	0.0487176	0.03131	0.0163351	0.0218604	0.029567	0.0343572	0.0304819	0.0350848	0.0362733	0.0381358	0.0341805	0.0336289	0.0269349	0.0324618
0.47		0.017022	0.034554	0.026494	0.0268436	0.0348405	0.0254783		0.0296922	0.0398989	0.0126734	0.0378685	0.030553	0.0210926	0.028813	0.0133304	0.0192459	0.0225657	0.0357741	0.0234543	0.0176073	0.0251733	0.0225059	0.00886642	0.0179757	0.0314265	0.0135378	0.0471737	0.0306267	0.0163044	0.0214188	0.0284545	0.0330156	0.0308738	0.0354564	0.0353645	0.0413132	0.0337435	0.035706	0.0276769	0.0322942
0.48		0.0166359	0.0329581	0.0269866	0.0275192	0.032667	0.0243458		0.0306241	0.0403627	0.0127385	0.0379867	0.0311892	0.0197251	0.028234	0.0114323	0.019279	0.0230265	0.0353089	0.0249958	0.0187111	0.0250257	0.0222405	0.00905294	0.0153639	0.0312953	0.0132828	0.0444788	0.0307433	0.0177926	0.0235223	0.0288848	0.033081	0.0306234	0.0360704	0.0348391	0.0395265	0.0344157	0.0360776	0.027941	0.0313597
0.49		0.0157682	0.0336734	0.0252277	0.0283316	0.0356365	0.0230969		0.0293677	0.0405408	0.0127864	0.039035	0.0320491	0.0192678	0.028041	0.0128131	0.0190841	0.0228831	0.0346056	0.0249685	0.019815	0.0267427	0.0216	0.00881739	0.015567	0.0312119	0.0145367	0.0445643	0.0304191	0.0153447	0.0237996	0.0288473	0.0362268	0.0301372	0.036074	0.034458	0.040063	0.0338705	0.0351822	0.0260348	0.0309266
0.5		0.0165487	0.0339367	0.0243739	0.0279014	0.0339191	0.0229424		0.0289661	0.0414369	0.0121684	0.0378152	0.0310256	0.0191168	0.028242	0.0134267	0.0192619	0.0225105	0.0340945	0.0240912	0.0199642	0.0266482	0.0222767	0.0100203	0.0159763	0.0318519	0.0141964	0.0424214	0.0292804	0.0146245	0.0219255	0.0282487	0.0366508	0.0302498	0.0378323	0.0343818	0.0420026	0.0346818	0.0318404	0.027431	0.0323071
0.51		0.0166588	0.033968	0.0263151	0.0288344	0.0322682	0.0230543		0.0315183	0.0436362	0.0118376	0.0386253	0.0306899	0.0193508	0.0285074	0.0130865	0.0193882	0.0230748	0.0326877	0.0234854	0.019939	0.0267313	0.0216461	0.00984648	0.0162029	0.0341728	0.013909	0.0433935	0.0288975	0.0151406	0.0234519	0.0295689	0.0361751	0.030422	0.036195	0.0346521	0.0389186	0.0341082	0.0334938	0.0276424	0.0317582
0.52		0.015671	0.0341507	0.0259542	0.0283667	0.0333885	0.0230949		0.0302591	0.0413985	0.0122315	0.0387017	0.0322992	0.019597	0.0284564	0.0128666	0.0208725	0.0226931	0.0314449	0.0235824	0.0198926	0.0262844	0.0210103	0.00915552	0.0169912	0.0341729	0.0137523	0.0421286	0.0284608	0.0163173	0.0248388	0.0304844	0.0361024	0.0305434	0.0356648	0.0338579	0.0385413	0.0350826	0.0365659	0.0273758	0.0326418
0.53		0.015953	0.0336359	0.0249661	0.0284279	0.0360232	0.0231698		0.0295603	0.0447247	0.0124709	0.0397448	0.0316282	0.0197991	0.0277725	0.0129913	0.0194637	0.022828	0.0305078	0.0247608	0.0198329	0.0278811	0.0201229	0.0102201	0.0175624	0.0332589	0.0137145	0.0405544	0.0294309	0.0174891	0.0248104	0.0306409	0.0374162	0.0306849	0.0359143	0.0321528	0.0401522	0.0345231	0.0348544	0.0288294	0.0323827
0.54		0.0158439	0.0325149	0.0235473	0.0300388	0.0313868	0.023542		0.028682	0.0404276	0.0125382	0.0404505	0.0307158	0.0198491	0.0287641	0.0136524	0.0196231	0.0224341	0.0285233	0.0250947	0.0195089	0.0264799	0.0199421	0.0104493	0.0143551	0.0326843	0.0141126	0.0439978	0.0288103	0.0177265	0.0245684	0.0298669	0.0393493	0.0308851	0.0337865	0.0321819	0.0419387	0.0352084	0.0334899	0.0258815	0.0328642
0.55		0.0155924	0.0325359	0.0238407	0.0309671	0.034273	0.0237608		0.0308781	0.0426655	0.012424	0.0405421	0.0305489	0.0200252	0.0299487	0.0125257	0.0197905	0.0220305	0.0269122	0.025452	0.0187409	0.0274576	0.0207355	0.0100688	0.0180126	0.0328488	0.0142638	0.044663	0.0287319	0.0173795	0.0244378	0.0291508	0.0370167	0.0306859	0.0358298	0.0332982	0.0386089	0.0356684	0.0324459	0.0248619	0.0332233
0.56		0.0161513	0.0347276	0.0237785	0.0321544	0.0348629	0.0235239		0.0317437	0.0456746	0.0122172	0.0414441	0.0304724	0.0202714	0.0295816	0.0123561	0.0196707	0.0230079	0.0264451	0.0242949	0.0182591	0.0263015	0.0202964	0.00900863	0.01844	0.0336915	0.0140538	0.043438	0.0296791	0.0173276	0.0254632	0.0287502	0.0367841	0.0299662	0.0352903	0.0338023	0.0399633	0.0358621	0.0333782	0.0251867	0.0324987
0.57		0.0169783	0.0324202	0.0232182	0.0303451	0.032862	0.0223014		0.0309594	0.0441227	0.0123665	0.0397015	0.030494	0.0205958	0.0289926	0.0132439	0.0204661	0.023303	0.0268524	0.0244494	0.0195913	0.0240265	0.0202694	0.010311	0.0181805	0.0341013	0.0134181	0.0406848	0.0300637	0.017344	0.0261366	0.0294853	0.0379916	0.0294053	0.035906	0.0339741	0.0409722	0.0352418	0.0332698	0.025178	0.0318935
0.58		0.0176365	0.0339582	0.0242264	0.0327574	0.0328805	0.0226484		0.0293454	0.0427654	0.0125311	0.0401854	0.0307447	0.0205029	0.0283128	0.0135756	0.0185192	0.023675	0.0272009	0.02472	0.0209236	0.0253126	0.0220502	0.00979325	0.0180186	0.0337344	0.0142108	0.0413892	0.0275642	0.0172495	0.0265407	0.0291201	0.0357387	0.0289436	0.036433	0.0348603	0.0402755	0.035802	0.0307204	0.0259079	0.0309962
0.59		0.0175265	0.0326113	0.024162	0.031632	0.0338254	0.0235194		0.0300395	0.0439455	0.0115386	0.0419231	0.0305209	0.0200904	0.0298717	0.0131545	0.0194218	0.0234731	0.0270186	0.0255198	0.0209149	0.0240903	0.0222334	0.007435	0.0186742	0.0319631	0.0138973	0.04015	0.0285969	0.0171702	0.0250747	0.0257469	0.0333701	0.0304077	0.0352618	0.0346986	0.0366329	0.0346923	0.0321337	0.0254454	0.03158
0.6		0.0169638	0.0310381	0.0232683	0.0310759	0.0339505	0.0240457		0.0305488	0.0437745	0.0109741	0.0424082	0.0300615	0.0191263	0.0303459	0.0122068	0.0195735	0.0231747	0.0279956	0.023502	0.0207566	0.0243807	0.0210903	0.00871778	0.019662	0.0321628	0.0137912	0.0412848	0.0275758	0.017617	0.0242519	0.025797	0.0351629	0.0323609	0.0345591	0.035932	0.0406514	0.0320682	0.0342854	0.0250951	0.031954
0.61		0.0170352	0.0314066	0.0233274	0.030678	0.0334755	0.022929		0.030541	0.0423941	0.0118665	0.0420879	0.0294297	0.0193025	0.0294833	0.0137928	0.0191506	0.0226625	0.0285467	0.0241933	0.0209367	0.0236428	0.0223608	0.00908261	0.0182118	0.0330886	0.0147171	0.0404082	0.0269581	0.0178769	0.0243812	0.0263185	0.035543	0.03032	0.034985	0.0348434	0.0423824	0.0358804	0.0321799	0.026663	0.031716
0.62		0.0182657	0.0318755	0.023334	0.0320592	0.0342603	0.0234154		0.0303925	0.0429139	0.0120527	0.0421092	0.0298787	0.0207688	0.0299421	0.0149891	0.0195238	0.0204679	0.029255	0.0245753	0.0212895	0.0273308	0.0236264	0.008881	0.0193496	0.0344969	0.0138972	0.0406652	0.0272814	0.0178331	0.0250802	0.0252864	0.0338085	0.028471	0.0343924	0.0350971	0.0411364	0.0316822	0.0320891	0.0253504	0.0307532
0.63		0.0168702	0.0293075	0.0231854	0.0306701	0.0366371	0.0240831		0.0323599	0.0429571	0.0112477	0.041378	0.0308112	0.0199296	0.0300011	0.0147877	0.0206	0.0222821	0.0299573	0.024122	0.0215444	0.0245835	0.0219572	0.00845835	0.0208014	0.034491	0.0139325	0.0399694	0.0279806	0.0176273	0.0250534	0.0249937	0.0338648	0.02811	0.0334197	0.0335804	0.0418719	0.0336667	0.0336714	0.0253581	0.0307811
0.64		0.0165522	0.0298232	0.0222694	0.0313334	0.0352001	0.0232501		0.0322831	0.0419236	0.0114885	0.0434702	0.0311824	0.0193191	0.0286602	0.0151859	0.0180701	0.0223154	0.0297952	0.0232871	0.0216652	0.0262506	0.0237808	0.00850363	0.0198856	0.0335548	0.0140881	0.0407522	0.0283537	0.0184684	0.0223493	0.0247252	0.0355371	0.0277443	0.0328287	0.0346217	0.0400377	0.0335788	0.0333953	0.0248921	0.032421
0.65		0.0174043	0.0292143	0.0222212	0.0329844	0.0330495	0.0251297		0.0314183	0.0410448	0.012427	0.041332	0.0309894	0.0194806	0.0283434	0.0151976	0.0174929	0.022058	0.0298803	0.0221141	0.0219387	0.0240599	0.0272578	0.00834232	0.0198622	0.031811	0.0139596	0.0398686	0.0281788	0.0170685	0.0229142	0.0232444	0.0360671	0.0273694	0.0331091	0.0325883	0.0392159	0.0339762	0.0330028	0.0219187	0.0312868
0.66		0.0173886	0.0290118	0.0224776	0.0302933	0.0326189	0.0253027		0.0306602	0.042224	0.0120391	0.040686	0.0303947	0.018546	0.0287227	0.0152757	0.0185754	0.0212676	0.0301537	0.0218265	0.0229015	0.0249317	0.0243552	0.00764166	0.0201279	0.0312492	0.0137668	0.0370554	0.0265441	0.0172275	0.0248041	0.0232931	0.0366736	0.0264605	0.0330328	0.033833	0.0394626	0.0342554	0.0325688	0.0236301	0.0326519
0.67		0.0179234	0.027442	0.0222469	0.0324095	0.0325612	0.0250096		0.0291314	0.0421382	0.0112785	0.0417039	0.0294433	0.0182465	0.030825	0.0148858	0.0177904	0.0196623	0.0313711	0.0232313	0.0238643	0.023763	0.0241156	0.00865105	0.0185173	0.0320522	0.0135312	0.0372583	0.0265984	0.0183497	0.023092	0.0239852	0.0378402	0.0250416	0.0338003	0.0313768	0.0382153	0.033175	0.0344235	0.0229909	0.0327145
0.68		0.0184023	0.0260696	0.0222714	0.0310396	0.0319376	0.0266583		0.0300591	0.0409284	0.0118289	0.0426757	0.0299075	0.0205216	0.0301161	0.0148147	0.0166622	0.0202311	0.0313593	0.0236901	0.0235455	0.0261173	0.0243984	0.00891528	0.0179743	0.0330352	0.0134187	0.0387048	0.0270507	0.0181178	0.0228221	0.0234088	0.038894	0.0257765	0.034108	0.0307434	0.0380097	0.0343225	0.0367923	0.0223166	0.0321395
0.69		0.017006	0.0261901	0.0222435	0.0312249	0.0309276	0.0264548		0.0301287	0.040682	0.0123327	0.042167	0.0314624	0.0195836	0.0273216	0.0153863	0.0164112	0.0199548	0.0315008	0.021824	0.0231515	0.0241	0.0261565	0.00847121	0.0183269	0.0328816	0.0134165	0.0387972	0.0262424	0.018644	0.0239873	0.023258	0.038684	0.027499	0.0335733	0.0324054	0.0379786	0.0330886	0.0382332	0.0236013	0.0314079
0.7		0.0169811	0.0270655	0.0218283	0.0313377	0.0328588	0.0271388		0.0287447	0.0389706	0.0123465	0.0411752	0.0300365	0.017681	0.0282017	0.0152227	0.0154403	0.019258	0.0317527	0.0223828	0.022188	0.0261946	0.0232938	0.00824527	0.0180265	0.0299955	0.0130284	0.0387088	0.0243027	0.0190164	0.0241311	0.0234501	0.0387659	0.0247928	0.0325648	0.0321968	0.0377514	0.0319747	0.0389331	0.0228836	0.0314196
0.71		0.0171187	0.0265791	0.0223677	0.0324318	0.0310877	0.0281384		0.0286803	0.0421831	0.0122224	0.0408275	0.0288865	0.0177304	0.0280012	0.0143838	0.0169457	0.0188221	0.0324269	0.0213608	0.0209902	0.0218379	0.0241297	0.00789107	0.0182843	0.029642	0.0133098	0.0362624	0.0261763	0.0190261	0.0240963	0.0244508	0.038997	0.0215196	0.0328413	0.0325744	0.0365772	0.0318974	0.0390852	0.0225789	0.031722
0.72		0.0164137	0.0266017	0.0228268	0.029851	0.030614	0.0274447		0.0308512	0.0379175	0.0118343	0.0406577	0.0280207	0.0179908	0.0263525	0.0149642	0.0151088	0.0185602	0.0329301	0.0204859	0.0208133	0.022976	0.0256369	0.00744572	0.0176056	0.0300484	0.0132331	0.0395643	0.0270558	0.0186091	0.0238838	0.0247133	0.0391459	0.0237535	0.0335177	0.0327926	0.034441	0.0331847	0.0395683	0.0222961	0.0304189
0.73		0.0167449	0.0255717	0.0226678	0.0297634	0.0313827	0.0270644		0.0281892	0.0383054	0.0115393	0.0411762	0.0285192	0.0183574	0.0255578	0.0144451	0.0162897	0.0177065	0.0327312	0.0201078	0.0217873	0.0253207	0.0281726	0.00690991	0.016788	0.0291857	0.0127657	0.0374032	0.025389	0.0178186	0.0244179	0.0242637	0.0389344	0.0253835	0.0320221	0.0292736	0.0340644	0.033784	0.0398363	0.0217974	0.0303379
0.74		0.0166062	0.0250364	0.0213737	0.0328823	0.0303174	0.0281721		0.0292785	0.0388675	0.0113262	0.0409558	0.0288986	0.0182584	0.0251596	0.0132175	0.0154843	0.0175653	0.0356633	0.0210621	0.0224919	0.023342	0.027068	0.00772015	0.017581	0.0283699	0.0131224	0.036493	0.024751	0.017976	0.024725	0.0232647	0.0396303	0.0245597	0.0302749	0.0303956	0.035151	0.0338244	0.0397523	0.0228979	0.0319047
0.75		0.0155022	0.0254356	0.0206435	0.031522	0.0294364	0.0301663		0.029186	0.0381495	0.0115053	0.0398158	0.0290687	0.0182631	0.0253985	0.0128767	0.0135022	0.0170011	0.0320177	0.0198242	0.0223202	0.0240621	0.0274983	0.0085065	0.0177916	0.0275904	0.0129387	0.0385674	0.0252878	0.0173886	0.0230201	0.0227442	0.0393531	0.0236832	0.0303473	0.0310192	0.0333289	0.0323431	0.0395264	0.0226448	0.0317374
0.76		0.0164258	0.0263518	0.0209993	0.0305809	0.0316334	0.0301252		0.0291691	0.0380007	0.0118361	0.0396731	0.0274606	0.0183724	0.0245257	0.0131464	0.0156282	0.0173832	0.0338675	0.0186517	0.0221491	0.0246332	0.0282632	0.00890802	0.0152572	0.0277111	0.0128864	0.0341444	0.0251771	0.0175232	0.0228563	0.022882	0.0389412	0.0227158	0.0329554	0.0306262	0.0332129	0.0321261	0.0394632	0.0221642	0.0311761
0.77		0.0163829	0.0261413	0.0213914	0.0307896	0.0307512	0.0299423		0.0281559	0.0377101	0.0113073	0.0374752	0.0271251	0.0177892	0.0234316	0.0131986	0.0158646	0.0171809	0.0331572	0.019064	0.0225732	0.0232168	0.029116	0.00823392	0.0153901	0.0274794	0.0129638	0.0369858	0.025005	0.018698	0.0236476	0.0243635	0.0384012	0.0230274	0.0305534	0.0303389	0.0323702	0.0324081	0.0402043	0.0221848	0.0302354
0.78		0.0154416	0.0241007	0.0217187	0.0304214	0.0296297	0.031096		0.0290891	0.0367697	0.0106989	0.0375498	0.0290585	0.0172748	0.0237609	0.0127947	0.0152732	0.0157619	0.0326241	0.0190658	0.0229973	0.0222221	0.0301138	0.00787446	0.0147115	0.0267056	0.0126829	0.0367615	0.0269449	0.0184462	0.0226014	0.0236683	0.0360117	0.024449	0.0291197	0.0297072	0.0306012	0.0320812	0.0418494	0.0217445	0.0294738
0.79		0.0149211	0.0230934	0.0219693	0.0293347	0.0315837	0.0334943		0.0288805	0.0375996	0.0101559	0.0367069	0.028636	0.0169281	0.0243928	0.0128927	0.0168638	0.0164338	0.0288323	0.0189264	0.0226603	0.022469	0.0308278	0.00784545	0.0145976	0.0260639	0.0130296	0.0355652	0.0274879	0.0178187	0.0215826	0.0190103	0.0356532	0.0241578	0.0293966	0.0267296	0.0301469	0.0306511	0.0440787	0.0226224	0.0298048
0.8		0.0151476	0.0240283	0.0219126	0.0292771	0.031105	0.0336747		0.0276578	0.0363512	0.00981868	0.0362789	0.027614	0.016833	0.0252553	0.0129045	0.0162356	0.0165877	0.0287889	0.0181913	0.0220929	0.022681	0.032022	0.00835617	0.0146469	0.0256641	0.0130024	0.0364696	0.027202	0.0175493	0.0205979	0.0206077	0.034662	0.0231508	0.0303582	0.0281313	0.0318485	0.0304594	0.040228	0.02315	0.0302663
0.81		0.0156141	0.0239951	0.0219737	0.0290918	0.0313679	0.0338926		0.0274256	0.0342119	0.00999337	0.0361746	0.0261565	0.016632	0.0240153	0.0114631	0.0147932	0.0158814	0.0286156	0.0171312	0.0224698	0.0241191	0.0313241	0.00840534	0.0136833	0.0259856	0.0128027	0.0369088	0.0269135	0.0177131	0.0217317	0.0224814	0.03314	0.0230283	0.0297949	0.0291244	0.0321882	0.0294559	0.038847	0.0224573	0.0298606
0.82		0.0154477	0.023198	0.0221589	0.0279566	0.0308668	0.033867		0.0285528	0.035259	0.0102536	0.0356166	0.0266112	0.0160487	0.0235578	0.0130797	0.0153256	0.0154407	0.028475	0.017156	0.0236672	0.0231996	0.0330034	0.00834578	0.0165429	0.0257962	0.0132816	0.0358454	0.0265494	0.0179766	0.0223618	0.0227321	0.0316178	0.0229939	0.0260008	0.029532	0.0311227	0.0302937	0.0410384	0.0223364	0.0276008
0.83		0.0151519	0.0232189	0.0226407	0.0281989	0.0308812	0.0336885		0.0276008	0.0338228	0.0106077	0.035284	0.0272761	0.0164789	0.0241712	0.0130715	0.0158579	0.0148027	0.0293947	0.017492	0.0247138	0.0223584	0.0346948	0.00840095	0.0152983	0.0253254	0.0127903	0.036848	0.0244335	0.0160767	0.0209275	0.0230147	0.0311523	0.0222713	0.0290011	0.0276483	0.0333088	0.0285961	0.0414617	0.0221941	0.0262816
0.84		0.0148318	0.0231794	0.0232971	0.027648	0.0318796	0.0359964		0.0278299	0.0344289	0.0104081	0.0348405	0.0272805	0.0170907	0.0244883	0.0139087	0.0146	0.0133351	0.0290777	0.0167697	0.0254154	0.0199853	0.0330914	0.00877227	0.0155063	0.0250497	0.0128719	0.0359483	0.0237475	0.0165751	0.0222035	0.0225076	0.0315412	0.0219861	0.0297581	0.0269945	0.0308175	0.0307442	0.0413194	0.0225613	0.0278633
0.85		0.0145382	0.0227965	0.0239016	0.0285595	0.0323881	0.0351453		0.0276173	0.0347611	0.00993206	0.0344807	0.026412	0.0169351	0.0246566	0.0137151	0.0158594	0.0156333	0.0275755	0.0166242	0.0260149	0.0198232	0.0330578	0.00973304	0.0161198	0.0245576	0.0133578	0.0355759	0.02396	0.0158509	0.0241581	0.0204372	0.0309663	0.0232051	0.0293607	0.0266968	0.030709	0.0297242	0.0406072	0.0234986	0.0291108
0.86		0.015059	0.0233042	0.0234339	0.0249912	0.0308778	0.0340447		0.0286712	0.0335671	0.0104855	0.0345645	0.0255897	0.0160573	0.0245766	0.0122643	0.0147114	0.0145382	0.0270012	0.0162893	0.0253041	0.0209283	0.0336731	0.0112372	0.0151899	0.0238031	0.0136481	0.0368121	0.0235802	0.0146629	0.0233011	0.0205041	0.0303976	0.0242509	0.0300769	0.0280699	0.033469	0.029951	0.0402052	0.0229008	0.0281676
0.87		0.0150291	0.0242377	0.0235429	0.0251696	0.0299427	0.0344061		0.0276174	0.0335354	0.0111877	0.0339419	0.0258976	0.0149136	0.0246827	0.0128315	0.0136942	0.0139285	0.0270774	0.0168975	0.0245932	0.0199967	0.0321598	0.010591	0.0140266	0.0254735	0.0137703	0.036071	0.0219074	0.0150699	0.0228286	0.0211249	0.0302628	0.0250389	0.0281346	0.0271689	0.0307148	0.0297731	0.0399439	0.0222221	0.0290626
0.88		0.0143894	0.025505	0.0240328	0.0275756	0.0299206	0.0342143		0.0273608	0.0365441	0.0114952	0.0326036	0.0258149	0.0153029	0.0249339	0.0139319	0.0149338	0.0136084	0.0264271	0.01631	0.0253887	0.0181452	0.0311885	0.0116807	0.0156864	0.0266191	0.0140458	0.0349855	0.0205104	0.0160127	0.0226605	0.0219416	0.029782	0.0250166	0.030655	0.0275854	0.0317531	0.0312129	0.0387578	0.0222974	0.0285429
0.89		0.0154144	0.0254714	0.0249006	0.0263084	0.0302331	0.033043		0.0285208	0.0372232	0.011831	0.0318324	0.025524	0.0149837	0.0256052	0.0142088	0.0165754	0.0136556	0.0242591	0.0168447	0.0264645	0.0199149	0.0304187	0.0136695	0.0184634	0.0253041	0.0142298	0.0346045	0.0211668	0.0165461	0.0241894	0.025425	0.0292042	0.024418	0.0298743	0.0277651	0.0332081	0.0302114	0.0375048	0.0231897	0.0297403
0.9		0.0159861	0.0240458	0.0242619	0.0266638	0.0297836	0.0327774		0.0291297	0.0346382	0.0122596	0.0315549	0.0250396	0.0140463	0.0252168	0.0147853	0.0161025	0.0152572	0.0237154	0.017925	0.02693	0.0166095	0.0300536	0.0148314	0.0158688	0.0249151	0.0139727	0.0328249	0.0194706	0.0163739	0.0254735	0.0283139	0.0304323	0.0268356	0.0294911	0.0276174	0.0338001	0.0289261	0.0361704	0.0227601	0.0290627
0.91		0.0165288	0.0247895	0.023582	0.0294842	0.0300015	0.0347871		0.0293292	0.0382265	0.012858	0.0313961	0.0255238	0.013677	0.0240694	0.0148336	0.0167144	0.0160719	0.024226	0.0164319	0.0270145	0.0208365	0.0288707	0.0168993	0.0180383	0.0250529	0.014391	0.0327442	0.0234183	0.0159786	0.026381	0.0283962	0.0310511	0.030173	0.0311323	0.0277228	0.0325109	0.0276169	0.0359309	0.0242442	0.0287619
0.92		0.0181032	0.0255722	0.024289	0.026937	0.0328259	0.0340201		0.0295248	0.0385703	0.0136866	0.0333823	0.0264098	0.0140381	0.0274165	0.0141248	0.0180111	0.0177051	0.0229302	0.0167512	0.0290512	0.015916	0.0271344	0.0190378	0.0187151	0.0260825	0.0147901	0.0332566	0.0248366	0.0163289	0.0295338	0.0337889	0.0306941	0.0307067	0.0328256	0.0294051	0.0351365	0.0287136	0.0351336	0.0243281	0.029405
0.93		0.020411	0.0259319	0.0258008	0.0310589	0.0332581	0.0327028		0.0291607	0.0381284	0.0148856	0.0342136	0.0267336	0.0153705	0.0295012	0.0157613	0.0189964	0.0205337	0.0229008	0.0151359	0.0341275	0.0180196	0.0278414	0.0208094	0.0204468	0.0262704	0.0155039	0.0328124	0.0268887	0.0189054	0.0335404	0.0402934	0.0334735	0.0314479	0.0326707	0.0293826	0.0374279	0.028879	0.0322341	0.0227299	0.0306638
0.94		0.0223867	0.0299323	0.0277573	0.0319022	0.0351421	0.0317056		0.0259797	0.0398757	0.0163151	0.034535	0.0279079	0.0168784	0.0299625	0.0167711	0.0200276	0.0232455	0.0252348	0.016264	0.0390932	0.0191846	0.0247541	0.026472	0.0235601	0.0256522	0.0168871	0.0318914	0.0291365	0.0191957	0.0386927	0.0465608	0.0356812	0.0339442	0.0352861	0.0281847	0.0381703	0.0296277	0.028901	0.0233611	0.0324324
0.95		0.0233101	0.0324016	0.0302026	0.0321984	0.0423138	0.0317518		0.0280283	0.0428626	0.017489	0.0359141	0.0297629	0.0184809	0.0357002	0.0161057	0.0221754	0.0249671	0.0260772	0.0171636	0.0435033	0.017924	0.0265808	0.0312984	0.0252496	0.0298857	0.0199347	0.0379687	0.0312658	0.0214213	0.0442297	0.0511604	0.0383869	0.036894	0.037261	0.0325629	0.0380836	0.0316991	0.0255504	0.0265594	0.035204
0.96		0.0251563	0.0336502	0.0321078	0.0347715	0.0449137	0.0311908		0.030045	0.0479973	0.0185988	0.0384202	0.0330195	0.0202285	0.0419127	0.0172287	0.0250273	0.0286186	0.0284447	0.0192285	0.0479135	0.0243708	0.0180562	0.0345133	0.0296186	0.0328232	0.0208063	0.0365293	0.0407919	0.0256668	0.0502146	0.0534396	0.0437423	0.040642	0.0399568	0.0364648	0.0443616	0.0391059	0.0248117	0.0301112	0.0357838
0.97		0.0279523	0.0386294	0.034802	0.044546	0.0494393	0.0306821		0.0333391	0.0567567	0.0195207	0.0441661	0.0353955	0.0216702	0.0474028	0.0196212	0.0320277	0.0348341	0.0333801	0.0220851	0.0510537	0.0256993	0.0201384	0.032373	0.0354778	0.0325414	0.0220423	0.0367713	0.0446194	0.0299055	0.0583912	0.0501497	0.0507105	0.0398448	0.0459794	0.0390958	0.0500908	0.0465051	0.0226014	0.0335767	0.0423691
0.98		0.0311887	0.0456121	0.0387684	0.0472108	0.0481419	0.031287		0.0399319	0.0641355	0.0201714	0.0475644	0.037698	0.0229459	0.0501014	0.0208087	0.0323346	0.0386737	0.0387251	0.0239998	0.0541075	0.0280863	0.0139105	0.0260838	0.033379	0.0360105	0.0252143	0.0509187	0.0442336	0.0299379	0.0637313	0.035378	0.0517098	0.0356973	0.0542568	0.0453829	0.0540781	0.0530653	0.0187887	0.0372781	0.0438696
0.99		0.022936	0.0498345	0.039141	0.0499192	0.0393167	0.0337867		0.0410784	0.0627212	0.0196199	0.0472667	0.0445136	0.0239561	0.0440588	0.0226036	0.0301915	0.0386327	0.0452269	0.0242702	0.0550363	0.0251907	0.0122908	0.0150424	0.0359414	0.0396363	0.0258137	0.056268	0.0412504	0.0290866	0.0667753	0.00756148	0.0571297	0.0368625	0.0525345	0.0537464	0.0587966	0.0597634	0.015213	0.039592	0.0442731
1						0	4.63e-07				6.12e-07			0.0241403			0			0.0276737			0.0113228			0.0385995		0.0592114							0.0485307				0

## Sheet: LDTcomp single cell dist.
X-axis (normalized cell length		FDAA distribution
0
0.01				0.0256998	0.0245241	0.106676		0.122114	0			0.00566314	0.132437		0.109163	0.101066					0.0629158		0.082429	0.0355267	0.0161053	0	0.0528423							0.0842197	0.000361846		0.000806744			0.0523993	0.121052			0.083198		0.0717864		0.0613699	0.004053
0.02		0	0.104967	0.0436839	0.0390957	0.157108	0.0261933	0.130888	0	0.00202335	0	0.0425611	0.160695	0.0664039	0.132562	0.118363	0.0991769	0.0874704	0.0953214	0.101897	0.0754987	0.0617068	0.105112	0.0458286	0.0384827	3.60125e-05	0.0734745	0.0881625	0.0441849	0.0811607	0.100468	0.149238	0.00404584	0.142617	0.0051347	0.00149957	0.00229343	0.0588517	0.0476885	0.0619542	0.139379	0.00900966	0.0555893	0.0869546	0.0301085	0.09888	0.051909	0.0777956	0.0199306
0.03		0	0.11236	0.0591271	0.0515557	0.168636	0.0372915	0.136424	2.37727e-06	0.00490827	0	0.0711348	0.165331	0.0768155	0.153026	0.133585	0.0991345	0.091433	0.0933631	0.105038	0.0814535	0.0655767	0.107987	0.0525885	0.063268	0.00283576	0.0893321	0.0943219	0.0487323	0.0913361	0.103457	0.149223	0.00723825	0.144309	0.015988	0.00568112	0.00833883	0.066007	0.134022	0.0700034	0.152205	0.0163195	0.0621174	0.0942423	0.0607069	0.109768	0.0650022	0.0878221	0.0348185
0.04		0	0.122481	0.0697457	0.0665321	0.162327	0.0644878	0.139317	0.000642525	0.0114352	0	0.0936215	0.157449	0.0783718	0.142112	0.138314	0.104292	0.0948474	0.0978964	0.104881	0.0835453	0.0713228	0.0986458	0.0541238	0.0862538	0.0153114	0.0934718	0.104046	0.0575065	0.0936696	0.101312	0.14607	0.0107407	0.126905	0.0389944	0.00942848	0.0148912	0.0645485	0.143058	0.0767177	0.156334	0.0238102	0.0623938	0.0993549	0.0797717	0.113171	0.0629988	0.0942269	0.038995
0.05		0	0.130559	0.0747355	0.0758288	0.164088	0.0850901	0.135764	0.00234091	0.0213494	0.000233289	0.108577	0.144935	0.0817365	0.125188	0.136363	0.111046	0.0891119	0.0844298	0.102123	0.0847132	0.0739253	0.0914641	0.0510005	0.0968671	0.0326125	0.0926195	0.106484	0.0546916	0.0887004	0.0956698	0.135384	0.0191761	0.11479	0.0727756	0.0116302	0.021798	0.0610314	0.147098	0.0688316	0.143072	0.0325493	0.0640077	0.0987461	0.0963035	0.111974	0.0605447	0.0983646	0.0431715
0.06		0	0.127265	0.0739721	0.0782561	0.164785	0.0948739	0.131383	0.00516422	0.0338839	0.00117535	0.115224	0.136118	0.0819619	0.11778	0.135721	0.110341	0.0870574	0.0782467	0.0948584	0.0792371	0.0691655	0.0879717	0.0493794	0.100786	0.0484877	0.0892002	0.101944	0.0545855	0.0842443	0.0898102	0.12627	0.02744	0.107796	0.101939	0.0177364	0.0315306	0.0556917	0.147642	0.0697649	0.127262	0.0411148	0.0607581	0.0969081	0.10683	0.109792	0.0605513	0.0980062	0.0465186
0.07		0	0.124638	0.0747857	0.0757602	0.163362	0.0994226	0.126213	0.00964295	0.0490867	0.00399816	0.113077	0.12966	0.0779527	0.115345	0.128021	0.108661	0.0844086	0.0735783	0.0900378	0.0749866	0.0680032	0.0795556	0.0467912	0.0997968	0.0527511	0.08335	0.0897655	0.0484446	0.0784678	0.0810071	0.119415	0.0320669	0.104722	0.107772	0.0321513	0.0406847	0.0503061	0.142918	0.062373	0.115024	0.0478114	0.0546236	0.094214	0.103707	0.101105	0.0585329	0.0977081	0.0478718
0.08		0	0.122485	0.0703181	0.0727997	0.155317	0.100461	0.119331	0.0147736	0.0627904	0.00804968	0.0986336	0.130518	0.0692988	0.106897	0.114058	0.109101	0.0791971	0.065111	0.0913285	0.0720596	0.0669624	0.0717359	0.0422077	0.0956334	0.0536317	0.077932	0.0802082	0.0430061	0.0694479	0.0690665	0.115898	0.0367222	0.102509	0.10651	0.0452744	0.047537	0.0456713	0.135778	0.0544446	0.104313	0.0545158	0.0479291	0.0883285	0.0969678	0.0962342	0.0570249	0.0973378	0.049225
0.09		0	0.127773	0.0648951	0.07248	0.15414	0.0990792	0.114106	0.0212509	0.0734451	0.0151395	0.0977407	0.126749	0.0668631	0.0972624	0.106072	0.108718	0.0702564	0.0589026	0.092491	0.0696912	0.0611529	0.0652259	0.0363317	0.087851	0.0573668	0.0719817	0.073126	0.039678	0.0659709	0.0676895	0.113314	0.0422244	0.097621	0.104507	0.0564681	0.0507156	0.0419371	0.125006	0.0506129	0.0925913	0.0618263	0.0446684	0.0873911	0.0936502	0.0892533	0.0580025	0.0938826	0.0502767
0.1		0	0.129906	0.0649712	0.0692504	0.155742	0.094372	0.118237	0.029637	0.0799073	0.0243098	0.0944244	0.121858	0.0660378	0.0919124	0.0963483	0.10154	0.0675761	0.0542721	0.0929963	0.0682536	0.0580383	0.0607742	0.0337717	0.0838757	0.0486164	0.0654867	0.0676284	0.0375185	0.0629766	0.0635249	0.111491	0.047611	0.093634	0.095076	0.0637484	0.0536258	0.0398063	0.116607	0.0471196	0.0868283	0.0691369	0.0438416	0.0916593	0.0964342	0.0851598	0.0573706	0.0905155	0.0510979
0.11		0	0.125955	0.0612669	0.0675647	0.15166	0.0919172	0.114889	0.0488613	0.0774433	0.0353816	0.0916894	0.120716	0.0629689	0.0943722	0.0855687	0.0949496	0.0663198	0.0503166	0.0942279	0.0686257	0.0564602	0.0596044	0.0303949	0.0799676	0.0462737	0.0601922	0.0625845	0.0390325	0.0613807	0.063023	0.114854	0.0482689	0.0908773	0.0900971	0.0672119	0.0588669	0.0378417	0.11031	0.0445683	0.086956	0.0638347	0.0435094	0.0940546	0.0991813	0.083226	0.0566187	0.0872914	0.0519192
0.12		0.000239436	0.125723	0.0592166	0.0658995	0.152161	0.090897	0.106295	0.0645869	0.0763504	0.0468459	0.0929604	0.118032	0.0632409	0.0931777	0.0793146	0.0907124	0.0653586	0.0464708	0.0964289	0.0680429	0.0525442	0.055975	0.0295618	0.0732002	0.0431023	0.0568406	0.0579733	0.0399824	0.0624213	0.0631276	0.11869	0.0489128	0.0846018	0.0868192	0.0776529	0.059927	0.0359921	0.104279	0.0444603	0.0876788	0.0573682	0.0416193	0.0969978	0.0989584	0.0829861	0.0603154	0.0837114	0.0518214
0.13		0.000928612	0.126016	0.0597129	0.0641099	0.153515	0.0824417	0.0996442	0.0806305	0.0735989	0.0587057	0.0875269	0.118004	0.0634071	0.0930412	0.0745092	0.0869626	0.0641555	0.047524	0.0970622	0.0683703	0.0501619	0.0580014	0.0284645	0.0713706	0.0417561	0.0516996	0.0568301	0.0395913	0.0615658	0.0583222	0.116802	0.0485992	0.0799682	0.0854393	0.0925565	0.0583689	0.0354968	0.0978697	0.0445472	0.0859169	0.0536673	0.0427353	0.102014	0.096373	0.0850499	0.0598059	0.0799382	0.0515316
0.14		0.00271248	0.120634	0.0625503	0.0625767	0.152583	0.0758772	0.0947835	0.104879	0.0675496	0.0712005	0.0906045	0.11213	0.0632203	0.0927547	0.0683628	0.0844851	0.0663463	0.045009	0.0984843	0.0695916	0.0494463	0.0566136	0.0257234	0.0678268	0.0424088	0.0447635	0.056456	0.042629	0.0629543	0.0593692	0.114241	0.0482945	0.0753485	0.0830146	0.0860668	0.0525025	0.0365981	0.0905056	0.0425798	0.0841867	0.0506853	0.0449495	0.104689	0.092728	0.0803853	0.0593984	0.0754276	0.0512417
0.15		0.00612886	0.117035	0.0618305	0.0634523	0.145977	0.0715186	0.0928365	0.115615	0.0663751	0.0807426	0.0908218	0.108285	0.0628463	0.0923194	0.0656613	0.0818987	0.0660411	0.0432424	0.0991001	0.0693729	0.0470279	0.0610875	0.0240175	0.0651246	0.0427337	0.0419963	0.0568476	0.0431185	0.0653166	0.05977	0.110963	0.0507277	0.0696029	0.0822779	0.0709424	0.0525069	0.0394868	0.087102	0.0423692	0.0833251	0.04765	0.0470001	0.105869	0.092698	0.0792478	0.0628464	0.0708169	0.0509495
0.16		0.0115217	0.115192	0.0624924	0.0639739	0.142297	0.0702107	0.0877512	0.119433	0.0637178	0.0875367	0.0895154	0.105611	0.0612984	0.0956165	0.0654304	0.0791039	0.0656575	0.0450821	0.0988535	0.0687594	0.044921	0.0637613	0.0270859	0.0641099	0.0408676	0.0411075	0.0548084	0.0451679	0.0666956	0.0598725	0.109794	0.0531609	0.0643516	0.080436	0.0663496	0.0553466	0.0430819	0.0857141	0.0430158	0.0825998	0.0445861	0.0469727	0.102097	0.092562	0.0779762	0.0648878	0.0660699	0.0506574
0.17		0.018294	0.113597	0.062809	0.0647754	0.146915	0.0721364	0.0824225	0.118144	0.0599921	0.086959	0.0891805	0.100451	0.0595153	0.0958619	0.0663331	0.0765237	0.0660042	0.0487048	0.0999962	0.0711781	0.0437295	0.0636586	0.0274535	0.0623966	0.0426395	0.0401545	0.0547307	0.0506272	0.0651048	0.0586204	0.109396	0.0537254	0.0597604	0.0799825	0.0641728	0.0531658	0.0451755	0.0863167	0.0439144	0.0820624	0.0422142	0.0447221	0.101409	0.090129	0.0772121	0.0671672	0.0648654	0.0506006
0.18		0.025415	0.110517	0.0627233	0.0660591	0.147436	0.0730994	0.081287	0.127311	0.0567538	0.0861316	0.088495	0.104597	0.0579567	0.0995215	0.0663194	0.0742625	0.0661983	0.0468775	0.101121	0.0732808	0.0436021	0.0583847	0.0272795	0.058258	0.0395634	0.0386866	0.056648	0.0490986	0.0633617	0.0545944	0.113469	0.0542713	0.0557277	0.0801935	0.0719945	0.0523343	0.0454273	0.0867859	0.0463036	0.0829983	0.0405558	0.0455397	0.104311	0.0931945	0.0768334	0.0650637	0.0643288	0.0510616
0.19		0.0331245	0.103461	0.0639529	0.0677764	0.145754	0.0735697	0.0795336	0.123969	0.0574036	0.0857466	0.0864727	0.0971252	0.0560595	0.100862	0.0666551	0.0728981	0.0675017	0.0463929	0.101185	0.0739137	0.0438718	0.0637403	0.02697	0.0571079	0.0432428	0.0373305	0.058908	0.0488803	0.0627745	0.0514424	0.115463	0.0572719	0.0521374	0.0752839	0.0804695	0.0525603	0.0485936	0.0870694	0.0458398	0.08501	0.0392167	0.0475616	0.106571	0.0929527	0.0761571	0.0676919	0.0604582	0.0515225
0.2		0.0458904	0.0990845	0.0648939	0.0686499	0.141711	0.0689172	0.0772323	0.118358	0.0572346	0.0950977	0.0872618	0.101425	0.0563181	0.0984794	0.068922	0.0726122	0.0680027	0.0506855	0.100714	0.0737103	0.0445003	0.0648539	0.0254372	0.0590689	0.0428412	0.0373725	0.0597357	0.0501673	0.0654595	0.054815	0.111817	0.0603384	0.0511746	0.0787389	0.0700466	0.0522709	0.0517388	0.0847999	0.0458873	0.0842947	0.0385656	0.0450895	0.107338	0.0899127	0.0752763	0.0652604	0.0590791	0.051227
0.21		0.0567574	0.0961516	0.0674555	0.0693861	0.140049	0.0732969	0.0745168	0.128587	0.0536222	0.0967573	0.0876684	0.0982918	0.0577169	0.0978732	0.0699695	0.0722912	0.0685787	0.0487277	0.102409	0.0771655	0.0444103	0.0658337	0.0261935	0.0603075	0.0417282	0.0380114	0.0591697	0.0521265	0.0630817	0.0573274	0.111254	0.0605686	0.0507763	0.0728837	0.0618174	0.052504	0.0546662	0.0827828	0.0483399	0.0821301	0.0380309	0.0444278	0.103972	0.0897439	0.0770094	0.0680503	0.0607641	0.050297
0.22		0.0657438	0.0944326	0.0701434	0.0690984	0.137556	0.0736431	0.0725895	0.130372	0.0546211	0.0900548	0.0847794	0.0934371	0.0579818	0.0953808	0.069196	0.0719357	0.0704269	0.05192	0.10188	0.0761012	0.0439939	0.0649026	0.0264609	0.060196	0.0413471	0.0384074	0.0645782	0.0497558	0.0632643	0.0580407	0.113936	0.0606725	0.0505416	0.0758355	0.0705553	0.0533156	0.0567451	0.0857571	0.0454651	0.0830745	0.0382714	0.0437636	0.10371	0.0876092	0.0766612	0.0689513	0.0585258	0.0493669
0.23		0.0710103	0.0908272	0.0697525	0.0690689	0.133924	0.0742935	0.0726248	0.127429	0.0553512	0.0964818	0.0832626	0.0944312	0.0562317	0.0945269	0.0728341	0.0718773	0.0682272	0.0528638	0.101111	0.0748323	0.0442901	0.0611446	0.0295909	0.060017	0.0454147	0.0356626	0.0650227	0.0509421	0.0647937	0.0584775	0.112446	0.0658822	0.0514093	0.0745045	0.076099	0.0517828	0.0582341	0.0873872	0.0475032	0.0829939	0.0385118	0.0427951	0.105014	0.0852634	0.0713596	0.0692342	0.0559841	0.047219
0.24		0.0707655	0.0846311	0.0713407	0.0732339	0.130319	0.0737878	0.0702851	0.121036	0.0553796	0.0990104	0.0853633	0.0945057	0.0560878	0.0962703	0.0748904	0.0720606	0.0708482	0.0479557	0.100086	0.075468	0.0442101	0.0706171	0.0345249	0.0596456	0.0460282	0.0357854	0.0607017	0.0537988	0.0634658	0.0576964	0.109112	0.0714312	0.0506679	0.0765897	0.0698633	0.0514772	0.0590305	0.0878251	0.0482743	0.0797007	0.0386516	0.0418757	0.103219	0.0844092	0.0673226	0.0701186	0.0584397	0.0447516
0.25		0.0684407	0.0819591	0.0724993	0.073695	0.12644	0.0728757	0.0672747	0.125899	0.0533024	0.0902792	0.0838348	0.0920401	0.0584249	0.0916916	0.0730434	0.0715953	0.0725788	0.0539346	0.0977935	0.0782465	0.0437699	0.0693701	0.0389069	0.0586299	0.0458576	0.0359776	0.0639179	0.0538477	0.0628949	0.0561261	0.104053	0.0736071	0.050066	0.0771193	0.0666908	0.053306	0.0624775	0.0868419	0.0478438	0.0765699	0.0387843	0.0426162	0.102393	0.0818725	0.0674014	0.0690889	0.0591535	0.0423295
0.26		0.0680967	0.0791773	0.0738854	0.0719978	0.122364	0.0745998	0.071491	0.12216	0.0537866	0.0881213	0.0809448	0.0940258	0.0573108	0.0919091	0.073979	0.0706806	0.0715667	0.0521864	0.0988299	0.0764188	0.043167	0.0672171	0.0433809	0.0588199	0.0491437	0.035445	0.0672239	0.0549843	0.0630779	0.0553695	0.098934	0.0754935	0.0513407	0.0755305	0.0702928	0.0521787	0.0658331	0.0862095	0.0511627	0.0781588	0.0412379	0.0454733	0.102829	0.0794034	0.0658302	0.0675038	0.0579224	0.0411284
0.27		0.0655462	0.072464	0.0762963	0.0714976	0.119194	0.07494	0.0717715	0.116547	0.054968	0.0865312	0.080739	0.0949206	0.0561876	0.0897675	0.0757902	0.0713729	0.0726215	0.0510617	0.0971207	0.0783011	0.0426411	0.0730696	0.0487595	0.0590168	0.048243	0.0345547	0.0705255	0.0581172	0.0630594	0.0571042	0.0953697	0.0787913	0.0521259	0.0754407	0.0722864	0.0510617	0.0688136	0.0869473	0.0512433	0.0725475	0.0445212	0.0498931	0.101214	0.0773279	0.0587813	0.0662742	0.0543067	0.0399273
0.28		0.0625286	0.0689455	0.080729	0.0726124	0.119427	0.0734274	0.0670283	0.119806	0.0557498	0.0761081	0.0858983	0.0932645	0.0550087	0.0903006	0.0764899	0.0729911	0.0715955	0.0556497	0.0945941	0.0794808	0.0422596	0.0746515	0.0491294	0.0582059	0.0502922	0.0341707	0.0682328	0.0602022	0.0603285	0.0593565	0.0904738	0.0822386	0.0525307	0.0744273	0.0719542	0.0510668	0.0706164	0.0863317	0.0516789	0.0717594	0.045715	0.0457421	0.0999742	0.0760808	0.0606846	0.0628556	0.051405	0.0392268
0.29		0.0600465	0.0676983	0.0849837	0.0694804	0.12146	0.0744265	0.0675966	0.118805	0.0562586	0.0700515	0.0864027	0.0919422	0.0536893	0.0887236	0.0782229	0.074516	0.071419	0.0550553	0.0965219	0.0796205	0.0421477	0.0712933	0.0488996	0.0557125	0.0527238	0.0341835	0.0664422	0.0617733	0.0599233	0.0627933	0.0821398	0.0819197	0.0525977	0.0745739	0.0692701	0.0517566	0.0725854	0.0849871	0.0552047	0.0707482	0.045087	0.0475769	0.101522	0.0737835	0.0610792	0.0622271	0.0551812	0.0398475
0.3		0.0583926	0.0630741	0.0881927	0.074516	0.118808	0.0744062	0.0692041	0.116091	0.0550323	0.0671017	0.0859784	0.0905175	0.053977	0.0903965	0.0787148	0.0759951	0.0722257	0.0553995	0.0964907	0.0798015	0.042361	0.0753983	0.0501234	0.0547125	0.0515082	0.0343689	0.0651749	0.0622842	0.0611681	0.0632386	0.0754902	0.0811264	0.0523873	0.0731494	0.0642878	0.0523525	0.0749106	0.085912	0.0578647	0.0665059	0.0440245	0.0501749	0.100528	0.0713396	0.0640702	0.0607706	0.05679	0.0404682
0.31		0.0581475	0.0595122	0.090158	0.0743385	0.115846	0.0772202	0.070274	0.112147	0.0528813	0.0591446	0.0855446	0.0908942	0.0535287	0.0923788	0.0796728	0.0756714	0.0733949	0.0567478	0.0941715	0.0806168	0.0433569	0.0743203	0.0469022	0.0560714	0.0538748	0.0335046	0.0664977	0.0621582	0.0635813	0.0672922	0.0707145	0.0821872	0.0500434	0.0737298	0.0643563	0.0519747	0.0778693	0.0872714	0.0576167	0.0713659	0.0420785	0.0495178	0.0979407	0.0705954	0.0669542	0.0560111	0.0562323	0.0394007
0.32		0.059917	0.0579665	0.0926346	0.0730542	0.113639	0.0781488	0.0687909	0.106887	0.0548552	0.0560511	0.0853806	0.0929563	0.0521703	0.0927512	0.0810518	0.074597	0.0732802	0.059001	0.0915574	0.0872821	0.0426088	0.0748894	0.0544777	0.0577076	0.0547738	0.03418	0.0664985	0.0595892	0.0660657	0.069089	0.0663756	0.0835215	0.047611	0.0740983	0.0677561	0.0519685	0.0794431	0.0893324	0.0569958	0.067894	0.0409378	0.0557351	0.0937134	0.0700184	0.0643189	0.0585353	0.0545826	0.0367125
0.33		0.057756	0.0572484	0.0957653	0.0750411	0.115733	0.0766067	0.0654245	0.102117	0.0550978	0.0595522	0.085555	0.0904333	0.0520252	0.0947199	0.0826806	0.0747951	0.0748269	0.0574079	0.0916191	0.0890242	0.041411	0.0758488	0.0575722	0.0583851	0.0566492	0.0344859	0.0653228	0.0627979	0.067592	0.0672999	0.0622508	0.0854223	0.0460473	0.0707673	0.0665034	0.0523502	0.078988	0.0894335	0.0573615	0.065034	0.0457212	0.0565398	0.0909001	0.0693204	0.065199	0.0541515	0.0529871	0.0340243
0.34		0.0576518	0.0565252	0.0981648	0.0784436	0.113495	0.0770213	0.0678318	0.0987453	0.0554836	0.0553642	0.0866521	0.0887127	0.0529853	0.0929861	0.0857036	0.0754238	0.0763646	0.0592305	0.0877313	0.0898782	0.0427277	0.0723057	0.0598564	0.0575195	0.0593351	0.0342951	0.0650638	0.0641484	0.0675648	0.073366	0.0601098	0.0874191	0.0472916	0.0734049	0.0632483	0.0539926	0.0824762	0.0891158	0.0564231	0.0659324	0.0505047	0.0560238	0.0901349	0.0683623	0.0692188	0.0536529	0.0525598	0.0334019
0.35		0.060256	0.0542051	0.099663	0.0765439	0.110951	0.0816028	0.0699142	0.0986792	0.0575385	0.0504763	0.0847701	0.0902169	0.0542353	0.0932023	0.0869169	0.0757328	0.0771323	0.0608106	0.0868368	0.0945043	0.0429731	0.0725138	0.0615016	0.057437	0.060996	0.0373353	0.0664755	0.0625488	0.0668679	0.0736739	0.0582227	0.0896824	0.0474201	0.0707696	0.0650171	0.0552659	0.0852679	0.0903464	0.0586718	0.0659275	0.0520608	0.0616585	0.0883505	0.0672432	0.071794	0.0489001	0.0517383	0.0334947
0.36		0.0611435	0.0525626	0.100844	0.0775521	0.113061	0.0838967	0.070802	0.0927497	0.0579424	0.0475894	0.0825257	0.0886668	0.0551167	0.0948917	0.0862628	0.0759565	0.0791677	0.0594843	0.0874083	0.0975983	0.0423456	0.0739098	0.0599203	0.0582823	0.0645538	0.0366528	0.0693543	0.0633424	0.069605	0.0786556	0.0559227	0.0919967	0.0469571	0.069869	0.0680794	0.0560891	0.0865137	0.0906715	0.060967	0.0676071	0.0533017	0.0605741	0.0863872	0.0660522	0.0730084	0.0503187	0.0505597	0.0335875
0.37		0.059987	0.0515154	0.101305	0.0788762	0.114831	0.0881564	0.070276	0.0899266	0.0568975	0.0469387	0.0829584	0.0883238	0.055568	0.0941211	0.0875395	0.077251	0.0823201	0.0618465	0.0874174	0.101613	0.0447666	0.0763713	0.0604472	0.0597825	0.063595	0.0362716	0.0669388	0.0624356	0.0681127	0.0866318	0.0546662	0.0950845	0.0467545	0.0693997	0.0663315	0.0541568	0.0867467	0.0900668	0.0612303	0.0670768	0.0530167	0.061987	0.0847238	0.0650219	0.0733158	0.0509804	0.0510127	0.0321758
0.38		0.0577974	0.0497445	0.102112	0.0767293	0.115301	0.0925207	0.0695225	0.0911774	0.0557563	0.0472099	0.0835567	0.0869304	0.0551097	0.0981492	0.0903093	0.0787652	0.0821759	0.0636217	0.0865294	0.107629	0.0458489	0.0784468	0.0644768	0.06098	0.0634343	0.0374508	0.0679297	0.0604124	0.0680416	0.0929085	0.0559747	0.0983384	0.0479788	0.0725367	0.0640022	0.052976	0.0880074	0.0904174	0.0618054	0.0641071	0.0520987	0.0652517	0.0825595	0.0653914	0.0737011	0.0472365	0.0515299	0.0307216
0.39		0.0621907	0.0480834	0.103524	0.0803335	0.11308	0.102665	0.0721408	0.0822584	0.0633633	0.0462558	0.0840525	0.0866379	0.0535083	0.095759	0.0919574	0.0787877	0.0812262	0.0628116	0.0851835	0.113469	0.0450215	0.0811028	0.0659475	0.0616446	0.06488	0.0393297	0.0721211	0.0580564	0.0698119	0.100677	0.0560965	0.0986588	0.0485395	0.075297	0.0626584	0.0524546	0.0909289	0.0909291	0.0655929	0.0607495	0.0522986	0.0631821	0.0800389	0.062563	0.0755436	0.0483898	0.051351	0.0295356
0.4		0.0610851	0.0468547	0.105625	0.0799405	0.111123	0.109899	0.0727493	0.0800604	0.0647926	0.0443896	0.0829853	0.0866696	0.0497035	0.120553	0.0924575	0.0785932	0.0864298	0.058142	0.0850044	0.118125	0.0474411	0.0860992	0.0665677	0.060813	0.0679366	0.0392156	0.0714392	0.0585931	0.0680374	0.104213	0.0550561	0.0982788	0.0482931	0.0801153	0.0618974	0.0542493	0.0930244	0.0914723	0.0680657	0.0626651	0.0536019	0.0656551	0.0776484	0.0594541	0.0708116	0.0489016	0.0510797	0.0294121
0.41		0.058002	0.0470864	0.102921	0.0790749	0.109641	0.113984	0.0710844	0.0814893	0.0647537	0.0416742	0.0821629	0.0922749	0.0480073	0.120661	0.095332	0.077927	0.0866725	0.0647125	0.0872509	0.124016	0.0499603	0.088449	0.0691662	0.0599053	0.0668556	0.0397049	0.0718813	0.0592047	0.0700211	0.0948844	0.0550007	0.100042	0.0496036	0.0825502	0.06721	0.0551338	0.0955923	0.0924879	0.0675905	0.061517	0.0542477	0.0679279	0.075045	0.0586611	0.076158	0.0456257	0.0507336	0.0292886
0.42		0.0608381	0.0479034	0.101653	0.0794315	0.108867	0.111209	0.0715678	0.0834655	0.067256	0.0395724	0.0835631	0.0901475	0.0476867	0.108014	0.0967179	0.0772184	0.0856908	0.0673126	0.0885532	0.128187	0.0514353	0.0917427	0.0706368	0.0612685	0.0686954	0.0415563	0.07343	0.0591635	0.070981	0.0816567	0.0553317	0.102372	0.0515952	0.0867475	0.0700083	0.0549066	0.0989961	0.0938132	0.0694964	0.0589657	0.0533676	0.0687062	0.0720758	0.0557601	0.0761342	0.0449505	0.0528383	0.0289875
0.43		0.0619487	0.0462988	0.100944	0.0818765	0.107917	0.102409	0.0723358	0.0825047	0.0673449	0.0390688	0.0858616	0.0923414	0.0485663	0.101275	0.0938822	0.0790197	0.0857538	0.0689452	0.0897119	0.134614	0.0530125	0.0954259	0.0704486	0.0602489	0.0704803	0.0450863	0.0715671	0.0592891	0.0703471	0.080238	0.05551	0.101773	0.0535132	0.0876933	0.0616041	0.0543728	0.103401	0.0950355	0.0690192	0.0594314	0.0528281	0.0689507	0.0699938	0.0542281	0.0757714	0.0458598	0.0544521	0.0284531
0.44		0.0619968	0.0456922	0.10044	0.0818186	0.106881	0.0960823	0.0727606	0.0831498	0.0689579	0.0413794	0.0848206	0.087892	0.0458051	0.0958588	0.094188	0.0808994	0.0878188	0.0720049	0.089374	0.147625	0.0545606	0.094075	0.0733577	0.0589252	0.0690961	0.0467012	0.0736864	0.0611566	0.0746384	0.076111	0.0556998	0.100317	0.0547388	0.0901071	0.0571965	0.0536909	0.106018	0.095701	0.070841	0.0605961	0.055337	0.069987	0.068165	0.0544271	0.0777994	0.0473395	0.0535171	0.0279186
0.45		0.0609582	0.0464187	0.102141	0.0790707	0.105761	0.0911262	0.0731169	0.0858303	0.0720022	0.0401223	0.0847104	0.0913388	0.0468931	0.0893147	0.0932466	0.0804181	0.0859251	0.0726022	0.0873365	0.161758	0.0557858	0.104395	0.0766809	0.0588215	0.0677665	0.0472852	0.0798371	0.0637727	0.0731767	0.0732066	0.0560403	0.102188	0.0555536	0.0933736	0.0630653	0.0528124	0.10574	0.0953241	0.0728946	0.0599083	0.0578458	0.0716135	0.0662683	0.0522775	0.0774834	0.0434312	0.0529839	0.0277931
0.46		0.0583637	0.0452076	0.101401	0.0767237	0.104943	0.0905027	0.0734279	0.0843182	0.0707775	0.0389911	0.0855424	0.0883985	0.0493222	0.0875162	0.0930265	0.0798367	0.0869635	0.0714932	0.0921679	0.157748	0.0581276	0.102629	0.0777722	0.0609925	0.0703007	0.0481387	0.0784417	0.062707	0.0738488	0.0696959	0.0558205	0.105129	0.0569011	0.0936938	0.0658672	0.0555831	0.0983753	0.0950258	0.0735091	0.0600662	0.0574038	0.0736295	0.064301	0.0516375	0.082349	0.0459018	0.052745	0.0278751
0.47		0.0577723	0.0438693	0.102288	0.0765339	0.103299	0.0854618	0.074057	0.0817984	0.069873	0.0427535	0.0863037	0.0872933	0.047488	0.090223	0.0945844	0.0776685	0.0897154	0.0708439	0.0915385	0.152989	0.0611183	0.0948683	0.0757805	0.0623193	0.0672695	0.0523672	0.079366	0.059762	0.0786573	0.0670492	0.0545889	0.104998	0.0585175	0.0969971	0.0635985	0.057492	0.0931387	0.0944469	0.0739587	0.0636086	0.0566367	0.0725814	0.0622787	0.0510603	0.0834334	0.0409373	0.0518289	0.027957
0.48		0.0618981	0.0440585	0.105017	0.0793288	0.100887	0.0833459	0.0750337	0.0787422	0.0703238	0.0424036	0.0861843	0.0858008	0.0488808	0.0857727	0.0936617	0.0760666	0.0919587	0.0725392	0.0906296	0.145895	0.062306	0.0920857	0.0776583	0.0614409	0.067184	0.0532106	0.0827478	0.0597736	0.0772938	0.0685511	0.0546859	0.103758	0.0595127	0.094156	0.0601798	0.0558506	0.0925719	0.0906353	0.0743174	0.0618348	0.0579172	0.0756751	0.0619961	0.0477829	0.0826443	0.0491876	0.0517713	0.0275229
0.49		0.061873	0.0436718	0.105784	0.0827119	0.0998158	0.0826762	0.0766103	0.0755712	0.0738493	0.0395211	0.0891491	0.0827106	0.0511409	0.0886707	0.0929958	0.0792004	0.0893551	0.0705131	0.0913049	0.141374	0.064165	0.087665	0.0771202	0.0625653	0.0695903	0.0545282	0.0847022	0.0604509	0.0765018	0.0666597	0.0557621	0.105746	0.0578417	0.0969896	0.0554881	0.0562894	0.0919828	0.0892067	0.071785	0.0604767	0.0600702	0.0793668	0.0617597	0.0474387	0.085222	0.0519734	0.0543141	0.0270278
0.5		0.0614666	0.0428363	0.107232	0.0813972	0.0994028	0.0827634	0.076837	0.0702858	0.0745021	0.0421121	0.092809	0.0827221	0.0535621	0.0919402	0.0888872	0.0817064	0.0917582	0.0729062	0.0876699	0.139744	0.0667754	0.0811366	0.075354	0.0663438	0.0669911	0.0559133	0.0862526	0.0622425	0.0767538	0.0678702	0.0560574	0.109002	0.0573	0.0974333	0.0575858	0.0563434	0.0909745	0.0905797	0.0735293	0.0613984	0.0604422	0.0802308	0.0614757	0.0473805	0.0896742	0.0463602	0.0539151	0.0266096
0.51		0.0613224	0.0421658	0.108782	0.0784426	0.0991719	0.0807444	0.07663	0.0656601	0.0754408	0.0443561	0.0950624	0.0836398	0.0542089	0.0922393	0.0902343	0.0806397	0.093477	0.0760555	0.0863268	0.137643	0.0700817	0.0820743	0.0737672	0.0644749	0.0651599	0.0548456	0.0873908	0.0653138	0.0780813	0.0675482	0.0561554	0.110896	0.0589535	0.100258	0.0647581	0.0530976	0.0892874	0.0916948	0.0730686	0.0646385	0.0590516	0.0810092	0.0616055	0.0467298	0.0908507	0.0491624	0.0515765	0.0267145
0.52		0.0601796	0.0418577	0.1103	0.0764677	0.0961222	0.0777259	0.0766231	0.0621885	0.077221	0.0461617	0.0943426	0.0863046	0.0557332	0.0943728	0.0960253	0.0799735	0.0947597	0.0766123	0.086043	0.137419	0.0722109	0.0818505	0.0736125	0.0655701	0.0609039	0.0557059	0.087487	0.0596635	0.078199	0.069445	0.0571698	0.112208	0.0577326	0.0993272	0.0637128	0.0511754	0.0881785	0.0922207	0.0750197	0.0597495	0.0572811	0.0799217	0.0616482	0.0463346	0.087638	0.0483293	0.0537808	0.0268193
0.53		0.0607867	0.0422932	0.111709	0.0772232	0.0949557	0.078644	0.0769777	0.0589031	0.0802191	0.0484627	0.0920964	0.0917922	0.0572014	0.0925214	0.099501	0.0810151	0.096476	0.0726119	0.0860718	0.13743	0.0718698	0.0742619	0.0742872	0.0658989	0.072757	0.0566103	0.0890148	0.0597001	0.0812083	0.0726062	0.0574608	0.114036	0.0589965	0.10299	0.0586172	0.0508332	0.0860881	0.0906351	0.0767619	0.0619814	0.0546341	0.0796832	0.0603711	0.0453415	0.0937636	0.0507557	0.0554893	0.0272896
0.54		0.0631264	0.0435235	0.115536	0.0802966	0.0945464	0.0811093	0.0776694	0.0574524	0.0844121	0.0500743	0.0975104	0.0891265	0.0574288	0.094822	0.096736	0.0823431	0.101775	0.0753826	0.0848995	0.137436	0.0734926	0.0770327	0.0737554	0.0657401	0.0709161	0.057057	0.092127	0.0628064	0.0824286	0.0741836	0.0550699	0.116102	0.0611206	0.105324	0.0610251	0.0555806	0.0822146	0.0892741	0.0768237	0.0638767	0.0525529	0.0855569	0.0597122	0.044405	0.0956311	0.0509302	0.05525	0.0283959
0.55		0.0649005	0.0451533	0.118325	0.0771892	0.0924868	0.0860235	0.0794644	0.0560176	0.0884301	0.0497147	0.0968477	0.088008	0.0620882	0.0942471	0.0981053	0.0845742	0.102266	0.0767785	0.0824307	0.136452	0.0755034	0.0809137	0.0724656	0.0691366	0.0732723	0.0564102	0.0905268	0.0648121	0.0793952	0.0728978	0.0535338	0.116392	0.0622969	0.104833	0.0657051	0.0562831	0.0813534	0.0880801	0.0755217	0.0638895	0.0554168	0.0847708	0.0595779	0.0460983	0.0948857	0.048992	0.0560659	0.0295021
0.56		0.0665491	0.0474576	0.120199	0.0723393	0.0919413	0.0916291	0.0810843	0.0521297	0.0902789	0.051319	0.0948056	0.0805597	0.0666896	0.093872	0.101335	0.0862061	0.104961	0.069459	0.0821609	0.133533	0.0766875	0.0763735	0.071255	0.0689788	0.0755863	0.0556658	0.0910194	0.0631585	0.0772973	0.0731966	0.0531572	0.115787	0.0646741	0.104541	0.0653451	0.0548542	0.0811176	0.0888505	0.0749146	0.0673152	0.0582807	0.0867371	0.0593031	0.0476748	0.0965425	0.051695	0.057515	0.029309
0.57		0.0678956	0.0477469	0.121456	0.0711083	0.0917917	0.0960337	0.0819812	0.04858	0.0904897	0.0534531	0.0988822	0.0774954	0.0704679	0.0958011	0.101017	0.0863598	0.110485	0.0733546	0.0835891	0.131437	0.0775069	0.0802686	0.0706539	0.0705645	0.0771321	0.0571088	0.0939818	0.0601021	0.079813	0.075707	0.0539033	0.115869	0.0658835	0.100967	0.0642006	0.0556369	0.0811881	0.0893837	0.0799643	0.0693904	0.0583658	0.0909851	0.0593458	0.0489363	0.101217	0.0559837	0.0555936	0.0282628
0.58		0.0677809	0.0457652	0.120435	0.0780229	0.0908176	0.0973719	0.0844435	0.0479482	0.0898984	0.0535102	0.101322	0.0722474	0.0724036	0.0972574	0.103227	0.0870361	0.112394	0.0745755	0.080921	0.130565	0.0780609	0.0777573	0.069268	0.0738915	0.0803535	0.0592598	0.0961051	0.0625422	0.0815817	0.0731358	0.0552754	0.116326	0.0659832	0.102601	0.065107	0.0567147	0.0797301	0.0891772	0.0841825	0.0711213	0.0581562	0.0913782	0.0600417	0.0496556	0.101742	0.0572054	0.0538138	0.0272166
0.59		0.0702195	0.0472103	0.121687	0.0752008	0.0878285	0.0993925	0.0876797	0.0500924	0.0887358	0.0545629	0.0991257	0.0725603	0.0730592	0.101158	0.106742	0.0887423	0.116793	0.0720285	0.0820621	0.132354	0.077879	0.0775352	0.066625	0.0776383	0.0798593	0.0569237	0.0966982	0.0625388	0.0790957	0.0730798	0.0568262	0.11869	0.0664872	0.103384	0.0660321	0.0580291	0.0780392	0.0907817	0.0823863	0.0730617	0.0596942	0.0907653	0.0586604	0.047466	0.097935	0.0587932	0.0526128	0.0274302
0.6		0.0722197	0.0497915	0.122763	0.0728853	0.0850371	0.102661	0.0910614	0.0486809	0.0892081	0.0564577	0.0999224	0.068974	0.0744833	0.100661	0.103291	0.0915557	0.119422	0.0647276	0.0847316	0.134529	0.0808393	0.0800309	0.0650291	0.0834698	0.0816341	0.057958	0.0955969	0.060003	0.0841282	0.0744771	0.0584009	0.122175	0.0676535	0.10692	0.0660056	0.0596267	0.0763617	0.0930428	0.0856917	0.0759689	0.0619604	0.0910044	0.0568652	0.0461463	0.102917	0.0572508	0.0556232	0.0278811
0.61		0.0677541	0.0542012	0.122144	0.0716208	0.0841112	0.103745	0.0929885	0.0496374	0.0892533	0.0579593	0.101213	0.0689342	0.0783483	0.102768	0.107459	0.0962384	0.121942	0.0712996	0.08749	0.134426	0.0869514	0.088577	0.0662803	0.0876774	0.0843055	0.0615819	0.0952532	0.0588256	0.0865647	0.0745595	0.0599125	0.123044	0.0688457	0.109164	0.0651887	0.0607469	0.0770353	0.0927855	0.0873426	0.0823277	0.0646953	0.0921444	0.0576335	0.0461597	0.107788	0.0583223	0.0608945	0.0284354
0.62		0.0656062	0.0576195	0.119497	0.0713243	0.0835799	0.101756	0.0930989	0.0512126	0.0896816	0.0589961	0.100301	0.0671111	0.0799653	0.107061	0.109112	0.100467	0.126457	0.0731102	0.0874706	0.134046	0.0861128	0.0827167	0.0694335	0.0898737	0.0785627	0.0659318	0.0957026	0.0578554	0.0878123	0.0755156	0.0616622	0.122249	0.0697358	0.110693	0.0601348	0.0613712	0.0772368	0.0929605	0.0887582	0.0876645	0.0678873	0.0899433	0.0570848	0.0487054	0.10729	0.060717	0.0607494	0.0301687
0.63		0.0663384	0.0604214	0.12072	0.0813933	0.0826166	0.102664	0.0951933	0.0517184	0.0921144	0.0593166	0.105562	0.0679042	0.0816733	0.107901	0.109663	0.104057	0.125268	0.0742931	0.0895005	0.132912	0.0868758	0.0803274	0.0691708	0.0901966	0.0834305	0.0657877	0.0970254	0.0585849	0.0889801	0.0800475	0.064	0.122184	0.0712479	0.111789	0.0576451	0.0640432	0.0758574	0.0937091	0.0901583	0.0931388	0.0693475	0.0912752	0.0553038	0.0504248	0.103234	0.0598437	0.0613814	0.031902
0.64		0.0721739	0.0645291	0.121616	0.0811089	0.0807863	0.103686	0.0968854	0.0533779	0.0950935	0.0637953	0.10715	0.0674089	0.0835399	0.107457	0.109866	0.105779	0.126916	0.078832	0.0910011	0.133144	0.0912802	0.086071	0.0708363	0.0967471	0.0821673	0.0711912	0.0989003	0.0535579	0.087255	0.0823628	0.0658468	0.122616	0.0735467	0.114763	0.0626714	0.0664895	0.0752689	0.0934706	0.089716	0.100525	0.0669189	0.0919886	0.0556271	0.0519038	0.101932	0.0579331	0.0636849	0.0332944
0.65		0.07051	0.0681906	0.120595	0.0807591	0.0818932	0.108229	0.0956885	0.0539897	0.0966547	0.0680638	0.10566	0.0654694	0.085373	0.106209	0.112871	0.105378	0.128009	0.0832687	0.0916598	0.134953	0.0940233	0.0839581	0.0738755	0.101155	0.077405	0.0729145	0.10004	0.0574416	0.0884621	0.0826203	0.0671968	0.124446	0.0758728	0.111627	0.0640329	0.0684797	0.0740621	0.0935782	0.0888028	0.110866	0.0647885	0.0897592	0.0560104	0.0538004	0.10505	0.0625316	0.0654761	0.0339709
0.66		0.0700879	0.0711516	0.116734	0.0830061	0.0820981	0.108365	0.0955071	0.0533819	0.0961332	0.0684682	0.10497	0.0639648	0.0894833	0.103757	0.109348	0.105941	0.127016	0.0800567	0.0916673	0.136798	0.0973158	0.0825154	0.0767387	0.102855	0.0777734	0.0711787	0.100311	0.0565158	0.0898069	0.0826839	0.0700016	0.12729	0.0766814	0.115837	0.0586001	0.0688056	0.0714106	0.0966067	0.0914605	0.117641	0.0650653	0.0890803	0.0560602	0.0558568	0.104251	0.0551444	0.0670619	0.0346475
0.67		0.07425	0.0715533	0.118469	0.0877288	0.0807223	0.107751	0.0960041	0.052375	0.0942641	0.0705941	0.107963	0.0614138	0.0935038	0.111815	0.112359	0.107406	0.12426	0.0781986	0.0956879	0.132634	0.103789	0.0818503	0.0770782	0.102069	0.0790493	0.0718464	0.103122	0.0609665	0.0884695	0.0844025	0.0734143	0.128694	0.0781463	0.114848	0.0566785	0.0709942	0.0758558	0.099375	0.0913681	0.122736	0.0653421	0.0922956	0.0561771	0.0585529	0.109295	0.0604805	0.0723857	0.0349891
0.68		0.0754869	0.0724013	0.119165	0.0910592	0.078803	0.109281	0.0961836	0.0536381	0.0960308	0.0732504	0.106396	0.0595086	0.0964168	0.114845	0.111164	0.108147	0.12521	0.0868472	0.0975499	0.133182	0.107536	0.0831478	0.0732071	0.102481	0.0794443	0.0740087	0.104424	0.0656332	0.0905928	0.087564	0.0749557	0.128977	0.0800496	0.115832	0.0590935	0.0773894	0.0787421	0.101921	0.0912495	0.12721	0.0670639	0.0973763	0.0564256	0.0620544	0.112355	0.0591715	0.0772941	0.0350737
0.69		0.0745543	0.0788944	0.119391	0.0950117	0.0774271	0.111368	0.0965612	0.0557576	0.0994733	0.0725291	0.105916	0.0570376	0.0997811	0.111891	0.108815	0.108329	0.123935	0.0841017	0.0984941	0.13425	0.109688	0.0856295	0.0737415	0.105849	0.0778192	0.076911	0.103854	0.0658033	0.0918602	0.0891302	0.0762264	0.130528	0.082653	0.120379	0.061114	0.0784152	0.0759752	0.106186	0.0948812	0.128763	0.0689249	0.102118	0.0576888	0.0646994	0.112279	0.0622591	0.0814488	0.0351583
0.7		0.0713542	0.0817561	0.121125	0.0962447	0.0766222	0.112193	0.0972924	0.0577555	0.100562	0.0735192	0.106998	0.0546303	0.102217	0.113949	0.110193	0.109294	0.122226	0.0867452	0.101692	0.135848	0.109711	0.0843684	0.0716466	0.107613	0.0786978	0.0807588	0.101593	0.0700492	0.0922993	0.0934812	0.0768261	0.133149	0.0887282	0.120047	0.0628038	0.0795107	0.0747197	0.109944	0.0954886	0.133071	0.069002	0.098649	0.0576494	0.0666046	0.113373	0.0627386	0.0853259	0.0372375
0.71		0.0732912	0.0818111	0.112607	0.0983001	0.075897	0.114644	0.0999926	0.054918	0.0983754	0.076047	0.106932	0.0554422	0.104823	0.114537	0.11231	0.110767	0.123748	0.0903635	0.103586	0.137616	0.112618	0.0794609	0.0710163	0.10756	0.078	0.0866155	0.102393	0.0751463	0.0919671	0.0943835	0.0769309	0.135002	0.0917145	0.121792	0.0613986	0.0846818	0.074797	0.111894	0.0960175	0.136928	0.0683678	0.0985571	0.0562314	0.0685301	0.121131	0.0683259	0.0890738	0.0397835
0.72		0.0749824	0.0852656	0.11114	0.109739	0.0749216	0.118874	0.103081	0.0532508	0.0980206	0.0749458	0.10419	0.0560818	0.109954	0.1148	0.109881	0.111301	0.125091	0.0900884	0.107743	0.137377	0.117983	0.0832905	0.0723577	0.109736	0.0717799	0.0878449	0.106896	0.0814235	0.0960193	0.0990217	0.0760758	0.136161	0.0933318	0.12344	0.0582584	0.0849821	0.0769805	0.111492	0.0991694	0.139204	0.0706975	0.0996936	0.0562744	0.0729663	0.118065	0.074017	0.0925971	0.0423
0.73		0.0765612	0.088695	0.111105	0.104494	0.0738573	0.124501	0.104355	0.0532462	0.102243	0.0751678	0.1097	0.0586105	0.113534	0.113183	0.113127	0.111334	0.12586	0.093139	0.110988	0.137614	0.118211	0.0843757	0.0744255	0.11128	0.0734361	0.0910885	0.105934	0.0760947	0.0969646	0.102024	0.0787335	0.136281	0.094781	0.133825	0.0596361	0.0836513	0.0749779	0.109771	0.101694	0.140309	0.075798	0.0959406	0.056533	0.0757492	0.113902	0.0736797	0.0940135	0.0443169
0.74		0.0798785	0.0917626	0.108259	0.10226	0.0738072	0.126653	0.106861	0.0547452	0.0976771	0.0777582	0.106289	0.0551163	0.116028	0.104227	0.110861	0.112287	0.125582	0.0956025	0.109001	0.138582	0.118835	0.0816856	0.0741293	0.114831	0.0707175	0.096027	0.10749	0.0835945	0.0962294	0.10427	0.0842894	0.135385	0.0953262	0.13541	0.0626194	0.0836723	0.0738385	0.110456	0.102481	0.139232	0.0799583	0.0933901	0.0568334	0.0776914	0.117714	0.080384	0.0919697	0.0463338
0.75		0.0788	0.0940996	0.107593	0.10297	0.0744418	0.127938	0.110542	0.0545619	0.0930399	0.0817896	0.107465	0.0552884	0.11753	0.112447	0.114351	0.113643	0.124494	0.0975904	0.105376	0.138622	0.120232	0.086861	0.0757157	0.118034	0.0714212	0.0983003	0.11237	0.0859291	0.0964056	0.108617	0.0859401	0.134391	0.0952118	0.136397	0.0596572	0.0881802	0.0763871	0.111988	0.1072	0.139829	0.0821168	0.0942735	0.056853	0.0790242	0.111372	0.0853294	0.0928457	0.0478274
0.76		0.0759268	0.096819	0.107956	0.105342	0.0752654	0.127096	0.113521	0.0545919	0.0894461	0.0858841	0.106894	0.05872	0.118484	0.109485	0.109919	0.116488	0.125133	0.0992872	0.107244	0.137893	0.117893	0.0923381	0.0794166	0.116035	0.0673114	0.104801	0.115773	0.0833388	0.0995022	0.109371	0.0863679	0.133295	0.0952207	0.133863	0.0555176	0.0948877	0.0721597	0.115012	0.102248	0.141536	0.0838606	0.0980049	0.056783	0.0839255	0.0998423	0.0907199	0.0946219	0.0481107
0.77		0.0793009	0.104426	0.108778	0.10614	0.0749445	0.130875	0.11656	0.0563715	0.0909647	0.0890033	0.0975706	0.0584388	0.117832	0.112467	0.114525	0.119852	0.121453	0.0984425	0.110225	0.139111	0.116595	0.0886887	0.0842691	0.121446	0.0741115	0.107398	0.116635	0.0889553	0.10224	0.114376	0.0862711	0.134898	0.0982166	0.134291	0.0613076	0.0974694	0.0711094	0.11149	0.102474	0.141107	0.0826128	0.100423	0.0574768	0.0850189	0.111309	0.0885042	0.0930867	0.0483941
0.78		0.0827209	0.107565	0.109447	0.112973	0.0766274	0.137985	0.119991	0.0541044	0.0888654	0.0940457	0.106231	0.0599855	0.11694	0.113752	0.112485	0.122344	0.122511	0.101673	0.109936	0.140826	0.120011	0.101604	0.0895221	0.12307	0.0706965	0.107667	0.114488	0.0951306	0.10353	0.113162	0.0867299	0.139491	0.0997086	0.135349	0.067594	0.0973076	0.0801478	0.106323	0.107296	0.14396	0.081365	0.0990576	0.058475	0.0822841	0.0920331	0.0952067	0.0934168	0.050839
0.79		0.0844751	0.106246	0.108482	0.115693	0.078845	0.139777	0.121469	0.0541536	0.0881328	0.100234	0.107694	0.0590227	0.117354	0.114172	0.114959	0.124595	0.126984	0.105304	0.112028	0.140572	0.121385	0.102131	0.0951476	0.122856	0.0765038	0.114195	0.120289	0.0991678	0.101667	0.118209	0.0897653	0.144189	0.101668	0.136157	0.0659011	0.0948992	0.0832538	0.107292	0.11006	0.143865	0.0837921	0.0992668	0.0598369	0.0797601	0.0975439	0.0979582	0.0964214	0.0550728
0.8		0.0801115	0.112793	0.102117	0.11666	0.0798073	0.143279	0.12205	0.0563758	0.0932436	0.107355	0.109524	0.0594617	0.123658	0.112383	0.111937	0.127513	0.128614	0.103887	0.114528	0.140326	0.122064	0.104207	0.0928979	0.123445	0.0739405	0.115614	0.122726	0.106334	0.105896	0.125512	0.0921515	0.14901	0.104879	0.144317	0.0647274	0.096834	0.0851147	0.108758	0.1108	0.14274	0.0865171	0.102314	0.0596059	0.0831846	0.0952787	0.101061	0.0976366	0.0593067
0.81		0.081917	0.118783	0.0994563	0.117206	0.0799799	0.145678	0.12808	0.057178	0.0860508	0.112592	0.111777	0.0583027	0.128335	0.117817	0.117248	0.130569	0.13139	0.10868	0.115	0.14137	0.123687	0.104808	0.0929962	0.124693	0.0775312	0.118492	0.120428	0.107385	0.111462	0.130883	0.0935416	0.151512	0.106654	0.14667	0.0671174	0.100151	0.0871897	0.110769	0.112769	0.144363	0.0872501	0.100904	0.0595736	0.0890906	0.0952248	0.0994756	0.0980304	0.0632799
0.82		0.0847034	0.120345	0.10034	0.11311	0.081031	0.149579	0.132049	0.0584252	0.0839099	0.115648	0.113331	0.0561289	0.130907	0.117395	0.12015	0.131357	0.135334	0.111942	0.111842	0.144187	0.124727	0.108948	0.0939417	0.12486	0.0820701	0.122161	0.12631	0.107421	0.116534	0.134721	0.0946259	0.151083	0.109414	0.148664	0.0709429	0.105048	0.088561	0.104784	0.116293	0.146679	0.0872438	0.104761	0.0610261	0.0941202	0.0959754	0.103893	0.0962797	0.067188
0.83		0.0849155	0.125401	0.101191	0.118101	0.0848689	0.152806	0.133009	0.0593781	0.0854912	0.11651	0.119043	0.0599827	0.134158	0.125194	0.122071	0.131821	0.137731	0.114434	0.109483	0.147072	0.125344	0.115923	0.0943925	0.124065	0.0836956	0.121161	0.127848	0.109456	0.117977	0.14091	0.0955148	0.154182	0.113451	0.153634	0.0796673	0.105885	0.092789	0.100509	0.122181	0.145375	0.088802	0.109506	0.061869	0.0944582	0.0906791	0.109472	0.0985467	0.0714306
0.84		0.0828127	0.132191	0.102168	0.120437	0.0849427	0.152454	0.134735	0.0593593	0.0812395	0.115604	0.127224	0.0608768	0.136573	0.129785	0.1245	0.1371	0.13695	0.117929	0.112407	0.149846	0.126551	0.114194	0.0933104	0.122481	0.0874345	0.12113	0.123294	0.115939	0.120637	0.136843	0.0989659	0.161999	0.119544	0.157538	0.0837629	0.108062	0.103675	0.105718	0.126044	0.144329	0.091732	0.112279	0.0624673	0.0992393	0.0915196	0.114229	0.105763	0.0798693
0.85		0.0844698	0.134469	0.10279	0.121962	0.0857045	0.156998	0.137607	0.0601394	0.0751731	0.111225	0.130822	0.0604627	0.13851	0.131804	0.125695	0.142801	0.139267	0.11987	0.117482	0.154977	0.129008	0.114141	0.0890931	0.120735	0.0913738	0.122106	0.135403	0.115858	0.124615	0.137323	0.102916	0.168594	0.120135	0.159991	0.0783301	0.112777	0.109027	0.105908	0.130916	0.147111	0.0941471	0.111258	0.0659569	0.110624	0.0924008	0.117245	0.106199	0.088308
0.86		0.0933438	0.136926	0.103568	0.126114	0.0891926	0.164074	0.14522	0.0600636	0.0702564	0.11111	0.134697	0.0653329	0.140116	0.134478	0.121686	0.149908	0.14576	0.11797	0.122482	0.160066	0.133007	0.117164	0.0892707	0.119603	0.0893613	0.123989	0.140381	0.116626	0.129175	0.137813	0.106023	0.173459	0.120164	0.158769	0.079549	0.119136	0.111371	0.103403	0.137406	0.150066	0.0955401	0.115177	0.0683689	0.114445	0.10211	0.120812	0.106302	0.0946467
0.87		0.0876741	0.139634	0.105196	0.132517	0.092779	0.167412	0.149035	0.0591048	0.0686387	0.112684	0.143905	0.0706725	0.144646	0.139321	0.126358	0.157036	0.147732	0.116309	0.124052	0.16083	0.134858	0.120849	0.0909192	0.123555	0.0948204	0.126475	0.134995	0.118041	0.132275	0.141265	0.109882	0.179289	0.120374	0.163998	0.0896111	0.124432	0.109903	0.112008	0.138123	0.146525	0.0969832	0.119674	0.0693446	0.117898	0.104255	0.123292	0.115799	0.0973514
0.88		0.088299	0.140298	0.11184	0.129081	0.0973364	0.169289	0.149694	0.0577867	0.0756407	0.114414	0.145969	0.0770575	0.14699	0.144496	0.126218	0.161046	0.14587	0.119684	0.12895	0.164638	0.137351	0.121853	0.0934861	0.129627	0.0973007	0.124568	0.133266	0.124021	0.134212	0.145316	0.115909	0.18654	0.120769	0.165791	0.0922095	0.126788	0.109894	0.115095	0.136167	0.142917	0.0987414	0.118981	0.0782272	0.120953	0.107146	0.125824	0.124436	0.100056
0.89		0.0978363	0.140602	0.117356	0.138033	0.103208	0.174496	0.15487	0.0579769	0.0744673	0.11029	0.152623	0.0843491	0.149036	0.146147	0.128964	0.164981	0.152488	0.114516	0.13754	0.170348	0.141816	0.122287	0.097452	0.121558	0.0983251	0.126046	0.135795	0.121316	0.140467	0.145707	0.123933	0.193969	0.124132	0.168498	0.0882888	0.133756	0.114346	0.110151	0.137414	0.143033	0.100499	0.125299	0.0885579	0.123372	0.11641	0.128446	0.132095	0.107938
0.9		0.0961835	0.141641	0.122273	0.151741	0.111129	0.174936	0.159309	0.0592182	0.0722772	0.102281	0.16005	0.094241	0.157932	0.150713	0.126971	0.167681	0.163492	0.119397	0.149437	0.176835	0.142591	0.124221	0.104319	0.130424	0.108487	0.130132	0.143381	0.113162	0.149785	0.152362	0.134163	0.201668	0.124107	0.176148	0.0877534	0.142301	0.127995	0.113123	0.141364	0.147631	0.10187	0.125746	0.098019	0.126889	0.120771	0.130089	0.139868	0.118325
0.91		0.0942027	0.141846	0.127736	0.153693	0.117553	0.178627	0.161439	0.0614357	0.0900404	0.107267	0.168606	0.107982	0.157533	0.15004	0.134812	0.17073	0.16395	0.123707	0.160943	0.185153	0.142197	0.128369	0.108532	0.138687	0.117853	0.130725	0.149694	0.110093	0.155308	0.149813	0.14211	0.213591	0.117314	0.179651	0.0891128	0.151728	0.134502	0.118303	0.142188	0.143068	0.103217	0.125095	0.107195	0.128174	0.125687	0.141529	0.146995	0.128713
0.92		0.0941214	0.141404	0.139347	0.155873	0.122452	0.18217	0.165846	0.0672505	0.0974606	0.105872	0.179478	0.128179	0.157894	0.162018	0.140192	0.176775	0.164612	0.115857	0.160577	0.196436	0.142078	0.131604	0.110875	0.143571	0.129829	0.136364	0.151412	0.112701	0.154673	0.14665	0.149054	0.232023	0.121913	0.184993	0.0917436	0.160281	0.138591	0.123729	0.149021	0.138391	0.109049	0.136644	0.116172	0.125369	0.140091	0.14634	0.149927	0.133778
0.93		0.105457	0.143862	0.150956	0.156936	0.134248	0.178326	0.170048	0.0718467	0.104865	0.0974433	0.19316	0.155738	0.163587	0.165286	0.14523	0.18184	0.175313	0.12691	0.163645	0.208201	0.142436	0.126517	0.111385	0.145558	0.135302	0.139553	0.14762	0.119416	0.157928	0.146535	0.152116	0.245742	0.124565	0.1901	0.094794	0.168593	0.141025	0.128287	0.151879	0.136343	0.116453	0.143324	0.123014	0.129594	0.141702	0.155276	0.155888	0.138842
0.94		0.109079	0.147327	0.159473	0.137723	0.141473	0.178515	0.162859	0.0755862	0.11607	0.0972321	0.206837	0.171757	0.168868	0.181273	0.155182	0.18145	0.179142	0.12638	0.175265	0.226744	0.143336	0.124798	0.113633	0.148413	0.147577	0.142158	0.161494	0.128133	0.164765	0.155645	0.154842	0.252176	0.126158	0.200967	0.0974909	0.177736	0.15957	0.132199	0.161653	0.136738	0.121548	0.148145	0.126528	0.1345	0.151949	0.157173	0.165035	0.140317
0.95		0.109042	0.152617	0.164541	0.104337	0.145571	0.186103	0.15298	0.080263	0.118056	0.0994202	0.219445	0.178392	0.164116	0.191727	0.155269	0.18072	0.187536	0.12794	0.194653	0.244515	0.14869	0.116326	0.124958	0.148487	0.154184	0.149408	0.168343	0.144432	0.166098	0.165886	0.157708	0.255096	0.128502	0.207923	0.100131	0.187807	0.180866	0.14049	0.163855	0.123903	0.124707	0.152743	0.125144	0.139701	0.171144	0.170592	0.180938	0.134934
0.96		0.107189	0.148451	0.168003	0.0803243	0.15454	0.186624	0.140239	0.0773698	0.11748	0.104259	0.23573	0.181958	0.152785	0.194396	0.168042	0.178659	0.190588	0.144815	0.20956	0.261051	0.150871	0.0962344	0.132349	0.151741	0.161115	0.155405	0.166243	0.164667	0.17915	0.167591	0.156723	0.252275	0.134415	0.225959	0.104954	0.198373	0.201015	0.146846	0.166227	0.102603	0.124697	0.161312	0.120585	0.144418	0.178771	0.179131	0.193279	0.129552
0.97		0.123857	0.139912	0.161981	0.0481946	0.152549	0.174501	0.124443	0.0693602	0.116516	0.0987329	0.257978	0.192604	0.140158	0.231085	0.174007	0.174675	0.190493	0.159211	0.223074	0.275468	0.149724	0.075738	0.146877	0.162891	0.174462	0.158833	0.167346	0.175271	0.185115	0.185246	0.149197	0.244392	0.141102	0.231367	0.109945	0.208147	0.219388	0.147911	0.165166	0.0754896	0.118328	0.165514	0.115183	0.141009	0.181839	0.173821	0.184023	0.125069
0.98		0.13385	0.13063	0.14593	0.0321969	0.143349	0.166793	0.105075	0.0568169	0.119523	0.0907297	0.264814	0.186381	0.124373	0.230869	0.175215	0.1644	0.185453	0.167751	0.232795	0.280419	0.141856	0.0586969	0.154701	0.162501	0.182571	0.169667	0.170875	0.194491	0.178926	0.196085	0.136514	0.228251	0.146655	0.232239	0.115885	0.201507	0.235683	0.140104	0.15073	0.0458066	0.11222	0.167688	0.109608	0.129879	0.175376	0.16355	0.174034	0.121164
0.99		0.140592	0.115849	0.0980258	0.0230221	0.129978	0.149723	0.0769386	0.0415733	0.108532	0.0809433	0.246978	0.149328	0.10489	0.184532	0.180805	0.122485	0.166227	0.171974	0.229224	0.241549	0.132504	0.0402756	0.153511	0.158128	0.161872	0.191925	0.177157	0.185324	0.159418	0.167561	0.120073	0.20998	0.1409	0.194725	0.122337	0.18117	0.248843	0.127765	0.104522	0.0349295	0.107795	0.168091	0.0602165	0.111254	0.151903	0.137164	0.163391
1		0.150342			1.84521e-06		0.123395				2.58094e-06			0.060589		0.154629		0.145047	0.173826								0.203973	0	0	0.128251	0.157756		0.187865		9.90914e-06		0.142725	0.258994					0.162323				0.115678
[truncated: 29 more columns]
