# Supplementary material for: Maturing Mycobacterium smegmatis peptidoglycan requires non-canonical crosslinks to maintain shape
Source: eLife. 2018 Oct 16;7:e37516. doi: 10.7554/eLife.37516 (PMC6231781; doi:10.7554/eLife.37516)
Supplement: Figure 2—source data 1. [file elife-37516-fig2-data1.xlsx]

## Sheet: Data for Fig. 2C bar graph
	Count	Modulus (kPa)	Modulus (kPa) / Height (nm)	Height (nm) = Modulus (kPa) / (Modulus (kPa) / Height (nm))	Std Dev	Std Error
WT	73	232.29	0.303316	765.836	0.0532523	0.00623271
∆ldtAEBCG+F	47	211.596	0.242214	873.591	0.0663143	0.00967294
			1.25226

## Sheet: Raw Data
Filename = 03011429								ratio
mean	211.342	0.234071			201.308	0.1951		1.19975
	14				10
WT				∆ldtAEBCG+F
cell name	Mean (kPa)	Modulus / Height (kPa/nm)		cell name	Mean (kPa)	Modulus / Height (kPa/nm)
3	226.21	0.242		1	167.86	0.125
4	219.19	0.265		2	179.92	0.131
7	222.99	0.283		5	191.55	0.189
8	241.88	0.24		6	254	0.24
9	219.36	0.257		14	249.92	0.248
10	251.4	0.277		15	240.18	0.248
11	191.81	0.23		17	221.62	0.236
12	207.91	0.246		18	181.4	0.175
13	179.84	0.192		21	172.92	0.192
16	157.4	0.188		24	153.71	0.167
19	209.1	0.239
20	185.23	0.188
22	216.73	0.23
23	229.74	0.2
Filename = 03011515								ratio
mean	276.065	0.348125	797.957		259.89	0.311167	830.186	1.11877
	16				6
WT				∆ldtAEBCG+F
cell name	Mean (kPa)	Modulus / Height (kPa/nm)	Height (nm)	cell name	Mean (kPa)	Modulus / Height (kPa/nm)	Height (nm)
1	293.84	0.297	962.436	11	237.56	0.249	949.008
10	293.75	0.376	760.157	16	209.3	0.29	748.779
12	344.62	0.376	899.367	18	340.79	0.461	727.765
13	325.15	0.35	906.972	19	217.82	0.265	804.687
14	244.33	0.286	869.961	2	279.52	0.343	794.569
15	228.03	0.29	781.291	7	274.35	0.259	956.311
17	269.31	0.334	789.398
20	206.46	0.392	616.909
21	185.97	0.266	741.959
22.1	226.69	0.311	733.253
3	304.12	0.417	713.572
4	324.61	0.416	779.005
5	297.89	0.347	835.691
6	366.77	0.414	861.124
8	295.84	0.401	822.358
9	209.66	0.297	693.86
Filename = 03011842								ratio
mean	195.596	0.331755	666.183		201.683	0.247641	874.577	1.33966
	3				9
WT				∆ldtAEBCG+F
cell name	Mean (kPa)	Modulus / Height (kPa/nm)	Height (nm)	cell name	Mean (kPa)	Modulus / Height (kPa/nm)	Height (nm)
5	198.069	0.350065	600.167	1	220.008	0.224569	959.13
6	189.081	0.29043	671.018	2	178.664	0.189978	976.739
9	199.638	0.354771	727.364	3	220.274	0.247686	919.455
				4	173.171	0.196543	945.542
				7	198.741	0.276738	730.047
				8	196.102	0.328906	786.92
				10	183.947	0.229802	845.038
				11	218.113	0.273858	812.794
				12	226.125	0.26069	895.532
Filename = 03012027								ratio
mean	216.976	0.285086	771.77		215.018	0.268026	842.288	1.06365
	7				8
WT				∆ldtAEBCG+F
cell name	Mean (kPa)	Modulus / Height (kPa/nm)	Height (nm)	cell name	Mean (kPa)	Modulus / Height (kPa/nm)	Height (nm)
5	223.178	0.300857	735.676	1	215.756	0.274928	809.714
6	229.519	0.276369	811.37	2	195.954	0.295893	670.305
8	221.087	0.30283	754.46	3	197.461	0.227818	916.764
9	179.184	0.292477	702.515	4	228.808	0.267062	860.058
10	180.453	0.259172	675.78	7	210.23	0.247846	827.066
11	245.59	0.296802	826.509	12	250.712	0.35087	699.423
13	239.817	0.267097	896.08	14	190.837	0.245957	823.458
				15	230.384	0.233833	1131.51
Filename = 03012146								ratio
mean	217.455	0.31186	707.713		197.703	0.246244	836.1	1.26647
	11				4
WT				∆ldtAEBCG+F
cell name	Mean (kPa)	Modulus / Height (kPa/nm)	Height (nm)	cell name	Mean (kPa)	Modulus / Height (kPa/nm)	Height (nm)
2	228.517	0.331968	694.84	1	252.771	0.348949	716.186
3	242.608	0.361543	656.615	8	160.404	0.241995	682.936
4	237.215	0.304086	802.81	13	178.36	0.20767	901.126
5	236.574	0.338658	694.916	14	199.278	0.186359	1044.15
6	240.767	0.32177	765.19
7	230.137	0.327339	720.132
9	210.451	0.296634	720.805
10	211.704	0.298306	713.993
11	183.674	0.319068	582.981
12	187.715	0.27851	703.939
15	182.642	0.252585	728.62
Filename = 03012212								ratio
mean	220.737	0.338013	681.166		188.152	0.232059	892.39	1.45658
	7				5
WT				∆ldtAEBCG+F
cell name	Mean (kPa)	Modulus / Height (kPa/nm)	Height (nm)	cell name	Mean (kPa)	Modulus / Height (kPa/nm)	Height (nm)
1	218.448	0.353344	613.874	5	140.27	0.181167	928.77
2	166.881	0.331308	604.543	6	158.713	0.178692	966.383
3	229.546	0.302707	751.422	7	212.985	0.284928	762.778
4	237.682	0.352527	674.219	10	207.123	0.19747	1100.92
8	227.791	0.314604	717.762	11	221.67	0.318037	703.105
9	211.802	0.390061	626.627
12	253.008	0.321537	779.714
Filename = 03012249								ratio
mean	235.903	0.300508	801.718		221.148	0.258008	954.095	1.16472
	15				5
WT				∆ldtAEBCG+F
cell name	Mean (kPa)	Modulus / Height (kPa/nm)	Height (nm)	cell name	Mean (kPa)	Modulus / Height (kPa/nm)	Height (nm)
1	231.715	0.26556	868.593	7	227.468	0.214381	1130.72
2	235.99	0.288055	845.245	12	208.255	0.298347	705.527
3	236.096	0.315869	770.001	17	247.157	0.357171	704.764
4	233.538	0.295376	795.905	18	251.722	0.289041	875.871
5	198.997	0.279499	722.808	19	171.137	0.131101	1353.59
6	227.757	0.303043	753.094
8	264.893	0.277422	955.42
9	263.237	0.355932	759.871
10	254.427	0.308783	821.992
11	232.506	0.321257	734.22
13	233.802	0.333439	738.915
14	229.528	0.256885	876.196
15	238.612	0.314628	761.011
16	232.37	0.25444	944.633
20	225.08	0.337425	677.873

## Sheet: composite breakdown
wt	ldt		WT MEAN	LDT MEAN
0.242	0.125		0.303316	0.247368
0.265	0.131		0.0525614	0.0656794
0.283	0.189
0.24	0.24		1.03071e-06
0.257	0.248
0.277	0.248
0.23	0.236
0.246	0.175
0.192	0.192
0.188	0.167
0.239	0.249
0.188	0.29
0.23	0.461
0.2	0.265
0.297	0.343
0.376	0.259
0.376	0.224569
0.35	0.189978
0.286	0.247686
0.29	0.196543
0.334	0.276738
0.392	0.328906
0.266	0.229802
0.311	0.273858
0.417	0.26069
0.416	0.274928
0.347	0.295893
0.414	0.227818
0.401	0.267062
0.297	0.247846
0.350065	0.35087
0.29043	0.245957
0.354771	0.233833
0.300857	0.348949
0.276369	0.241995
0.30283	0.20767
0.292477	0.186359
0.259172	0.181167
0.296802	0.178692
0.267097	0.284928
0.331968	0.19747
0.361543	0.318037
0.304086	0.214381
0.338658	0.298347
0.32177	0.357171
0.327339	0.289041
0.296634	0.131101
0.298306
0.319068
0.27851
0.252585
0.353344
0.331308
0.302707
0.352527
0.314604
0.390061
0.321537
0.26556
0.288055
0.315869
0.295376
0.279499
0.303043
0.277422
0.355932
0.308783
0.321257
0.333439
0.256885
0.314628
0.25444
0.337425
