# Supplementary material for: Maturing Mycobacterium smegmatis peptidoglycan requires non-canonical crosslinks to maintain shape
Source: eLife. 2018 Oct 16;7:e37516. doi: 10.7554/eLife.37516 (PMC6231781; doi:10.7554/eLife.37516)
Supplement: Figure 2—source data 2. [file elife-37516-fig2-data2.xlsx]

## Sheet: Representative Cell
Length	Height	Modulus / Height
0	768.901	0.12039
0.01953	746.595	0.122342
0.03906	732.237	0.130523
0.05859	714.682	0.153898
0.07812	697.853	0.177273
0.09766	686.698	0.192153
0.11719	680.99	0.206537
0.13672	676.626	0.221576
0.15625	669.968	0.241499
0.17578	661.837	0.259903
0.19531	653.691	0.274475
0.21484	646.315	0.292243
0.23438	661.42	0.302271
0.25391	689.867	0.297184
0.27344	695.033	0.30037
0.29297	698.52	0.301844
0.3125	702.922	0.30345
0.33203	706.255	0.304074
0.35156	710.564	0.310101
0.37109	713.549	0.316634
0.39062	717.147	0.311697
0.41016	721.547	0.313473
0.42969	724.912	0.314111
0.44922	730.786	0.312323
0.46875	734.484	0.308412
0.48828	738.133	0.302481
0.50781	744.095	0.301719
0.52734	749.065	0.296789
0.54688	753.35	0.292544
0.56641	755.553	0.291
0.58594	761.223	0.290768
0.60547	765.239	0.288297
0.625	770.308	0.28534
0.64453	774.635	0.284374
0.66406	777.884	0.282556
0.68359	780.085	0.278407
0.70312	780.385	0.279744
0.72266	784.94	0.274589
0.74219	785.984	0.273433
0.76172	787.347	0.272715
0.78125	789.195	0.271245
0.80078	790.277	0.271896
0.82031	791.805	0.269289
0.83984	792.379	0.270368
0.85938	793.492	0.270709
0.87891	794.587	0.26972
0.89844	794.916	0.268522
0.91797	796.563	0.265933
0.9375	797.279	0.262578
0.95703	796.695	0.260502
0.97656	796.908	0.25793
0.99609	797.724	0.2559
1.01562	797.035	0.256141
1.03516	798.376	0.251108
1.05469	799.349	0.247875
1.07422	797.372	0.244657
1.09375	797.066	0.242975
1.11328	798.184	0.243843
1.13281	796.625	0.246793
1.15234	794.653	0.252648
1.17188	795.476	0.25557
1.19141	794.654	0.263575
1.21094	791.963	0.271902
1.23047	789.532	0.276482
1.25	788.804	0.276861
1.26953	786.715	0.28234
1.28906	785.911	0.282928
1.30859	783.531	0.282798
1.32812	782.503	0.283856
1.34766	783.562	0.286869
1.36719	782.597	0.284643
1.38672	782.953	0.289856
1.40625	784.773	0.294708
1.42578	783.28	0.300198
1.44531	784.566	0.301267
1.46484	785.372	0.298185
1.48438	788.082	0.290969
1.50391	790.774	0.283217
1.52344	792.965	0.281388
1.54297	796.57	0.280512
1.5625	801.843	0.280837
1.58203	805.273	0.280563
1.60156	810.009	0.280578
1.62109	813.511	0.28264
1.64062	817.334	0.286916
1.66016	821.925	0.289792
1.67969	827.072	0.289839
1.69922	832.462	0.284394
1.71875	836.538	0.274423
1.73828	843.556	0.258829
1.75781	849.048	0.245317
1.77734	855.128	0.231194
1.79688	865.491	0.213614
1.81641	881.827	0.19521
1.83594	900.77	0.178614
1.85547	921.648	0.170168
1.875	940.844	0.166868
1.89453	965.119	0.162234
1.91406	989.204	0.159543
1.93359	1013.78	0.152936
1.95312	1039.59	0.145009
1.97266	1064.16	0.140355
1.99219	1086.63	0.138395
2.01172	1110.61	0.137861
2.03125	1139.88	0.136702
2.05078	1166.24	0.136676
2.07031	1192.87	0.139933
2.08984	1220.3	0.144643
2.10938	1247.76	0.148623
2.12891	1273.67	0.148843
2.14844	1295.31	0.144108
2.16797	1321.32	0.139577
2.1875	1342.78	0.138741
2.20703	1364.49	0.1377
2.22656	1384.81	0.135155
2.24609	1402.54	0.135072
2.26562	1424.97	0.136322
2.28516	1444	0.137942
2.30469	1462.02	0.13864
2.32422	1478.19	0.138905
2.34375	1497.18	0.139782
2.36328	1512.17	0.139794
2.38281	1525.31	0.140405
2.40234	1540.62	0.141607
2.42188	1557.33	0.143846
2.44141	1572.71	0.146869
2.46094	1587.42	0.149659
2.48047	1600.19	0.148456
2.5	1615.09	0.144979
2.51953	1624.72	0.141873
2.53906	1636.37	0.140132
2.55859	1645.43	0.139371
2.57812	1655.88	0.137384
2.59766	1664.86	0.137598
2.61719	1676.21	0.136954
2.63672	1683.47	0.138779
2.65625	1691.75	0.140092
2.67578	1698.15	0.139229
2.69531	1705.75	0.14038
2.71484	1712.52	0.141503
2.73438	1718.9	0.141031
2.75391	1724.95	0.136521
2.77344	1730.05	0.135544
2.79297	1733.43	0.138529
2.8125	1737.79	0.141253
2.83203	1741.82	0.140509
2.85156	1745.72	0.136932
2.87109	1748.19	0.132513
2.89062	1751.68	0.13091
2.91016	1753.88	0.130079
2.92969	1756.53	0.128277
2.94922	1758.22	0.127737
2.96875	1760.77	0.124905
2.98828	1761.81	0.122109
3.00781	1763	0.119485
3.02734	1760.99	0.120047
3.04688	1758.79	0.119918
3.06641	1756.47	0.118416
3.08594	1753.63	0.118159
3.10547	1749.33	0.11793
3.125	1746.24	0.119812
3.14453	1741.11	0.119418
3.16406	1737.4	0.11654
3.18359	1730.93	0.113765
3.20312	1724.43	0.111867
3.22266	1719.15	0.108915
3.24219	1715.41	0.105356
3.26172	1706.91	0.103592
3.28125	1700.96	0.104146
3.30078	1693.83	0.102291
3.32031	1688.99	0.100775
3.33984	1679.37	0.100325
3.35938	1674.41	0.0990903
3.37891	1665.21	0.095838
3.39844	1659.73	0.0938276
3.41797	1649.59	0.0890579
3.4375	1642.63	0.0862189
3.45703	1630.21	0.0839813
3.47656	1621.44	0.0821464
3.49609	1611.69	0.0802919
3.51562	1605.28	0.0778844
3.53516	1594.68	0.0757694
3.55469	1586.07	0.074057
3.57422	1572.39	0.0728832
3.59375	1560.45	0.0720627
3.61328	1543.19	0.0715062
3.63281	1532.57	0.0716387
3.65234	1512.46	0.0706477
3.67188	1494.22	0.0686059
3.69141	1474.91	0.0664638
3.71094	1451.37	0.0647323
3.73047	1428.48	0.06271
3.75	1396.85	0.0581798
3.76953	1365.21	0.0534749
3.78906	1320.86	0.0478329
3.80859	1271.99	0.0417066
3.82812	1206	0.0380212
3.84766	1132.94	0.0353172
3.86719	1057.83	0.0345261
