# Supplementary material for: Maturing Mycobacterium smegmatis peptidoglycan requires non-canonical crosslinks to maintain shape
Source: eLife. 2018 Oct 16;7:e37516. doi: 10.7554/eLife.37516 (PMC6231781; doi:10.7554/eLife.37516)
Supplement: Figure 3—source data 1. — Below are the column names with a brief description-. Orf - ID of gene. Name - name of gene. Desc - annotation of gene. Sites - number of TA sites in gene. Mean Ctrl - mean insertion count averaged over TA sites and replicates for wild-type strain (mc2155). Mean Exp - mean insertion count averaged over TA sites and replicates for knockout strain (ΔLDT)log2FC - log-fold-change, log2(meanExp/meanCtl). Sum Ctrl - sum of insertion counts over TA sites and replicates for wild-type strain (mc2155). Sum Exp - sum of insertion counts over TA sites and replicates for knockout strain (ΔLDT). Delta Sum - difference of sums (sumExp-sumCtl) p-value - probability of null hypothesis (i.e. no significant difference between strains) estimated from resampling distribution. Adj. p-value - p-values after applying Benjamini-Hochberg correction for multiple tests. [file elife-37516-fig3-data1.xlsx]

## Sheet: WT vs. Delta LDT
#Orf	Name	Desc	Sites	Mean Ctrl	Mean Exp	log2FC	Sum Ctrl	Sum Exp	Delta Sum	p-value	Adj. p-value
MSMEG_0031c	-	penicillin binding protein transpeptidase domain-containing protein	20	172.1	8	-4.42	3442.5	160.42	-3282.1	0	0
MSMEG_0233	-	lipoprotein Lpps	10	365.4	0	-8.52	3654.4	0	-3654.4	0	0
MSMEG_0338	-	acyl-CoA dehydrogenase fadE12	16	123.6	6.7	-4.21	1977.3	106.95	-1870.3	0	0
MSMEG_0370	-	hypothetical protein MSMEG_0370	33	96.8	4.9	-4.32	3195.4	160.42	-3035	0	0
MSMEG_0491c	-	transcriptional regulator, LacI family protein	19	52	1.4	-5.21	988.6	26.74	-961.9	0	0
MSMEG_0514	-	alpha-galactosidase	24	78	4.5	-4.13	1871.3	106.95	-1764.4	0	0
MSMEG_0565c	-	putative glycosyl transferases group 1	11	102.7	7.3	-3.82	1129.9	80.21	-1049.6	0	0
MSMEG_0566c	-	aliphatic amidase	10	130.6	10.7	-3.61	1306.4	106.95	-1199.5	0	0
MSMEG_0569c	-	flavoprotein involved in K+ transport	19	72.5	0	-6.2	1377	0	-1377	0	0
MSMEG_0674c	-	ErfK/YbiS/YcfS/YnhG family protein	11	67.4	0	-6.1	741.5	0	-741.5	0	0
MSMEG_0687c	-	hypothetical protein MSMEG_0687	11	208.6	9.7	-4.42	2295	106.95	-2188.1	0	0
MSMEG_0826c	thiC	thiamine biosynthesis protein ThiC	15	67.1	0	-6.09	1006.3	0	-1006.3	0	0
MSMEG_0827	-	major facilitator superfamily protein MFS_1	16	175.4	20.1	-3.13	2807	320.84	-2486.2	0	0
MSMEG_0929	-	ErfK/YbiS/YcfS/YnhG family protein	18	222.6	3	-6.23	4007.5	53.47	-3954	0	0
MSMEG_1313	-	secreted protein	21	79	8.9	-3.15	1659.5	187.16	-1472.3	0	0
MSMEG_1322	-	ErfK/YbiS/YcfS/YnhG family protein	17	248.2	0	-7.96	4219.3	0	-4219.3	0	0
MSMEG_1536	-	ftsk/SpoIIIE family protein	29	67	5.5	-3.6	1941.9	160.42	-1781.5	0	0
MSMEG_2074c	-	hypothetical protein MSMEG_2074	16	71.7	1.7	-5.42	1147.5	26.74	-1120.8	0	0
MSMEG_2202	-	dimethylaniline monooxygenase	20	75	1.3	-5.81	1500.6	26.74	-1473.9	0	0
MSMEG_2252	-	flavin-type hydroxylase	19	60.4	1.4	-5.42	1147.5	26.74	-1120.8	0	0
MSMEG_2257	-	cytochrome P450-terp	15	44.7	0	-5.51	670.9	0	-670.9	0	0
MSMEG_2372	ilvB	acetolactate synthase 1 catalytic subunit	14	148.8	11.5	-3.7	2083.2	160.42	-1922.8	0	0
MSMEG_2492	-	D-lactate dehydrogenase	22	61.8	2.4	-4.67	1359.4	53.47	-1305.9	0	0
MSMEG_2550	-	glyoxylate reductase	10	77.7	0	-6.3	776.8	0	-776.8	0	0
MSMEG_2569c	-	oxidoreductase, 2OG-Fe(II) oxygenase family protein	10	84.7	5.3	-3.99	847.4	53.47	-793.9	0	0
MSMEG_2963	-	extracellular solute-binding protein, family protein 5	16	162.2	8.4	-4.28	2595.1	133.68	-2461.5	0	0
MSMEG_3027	-	hypothetical protein MSMEG_3027	10	84.7	2.7	-4.99	847.4	26.74	-820.7	0	0
MSMEG_3187c	-	acyltransferase domain-containing protein	31	82.6	4.3	-4.26	2559.8	133.68	-2426.2	0	0
MSMEG_3378c	-	beta-lactamase	18	38.3	3	-3.69	688.5	53.47	-635	0	0
MSMEG_3391	-	L-carnitine dehydratase/bile acid-inducible protein F	16	43	0	-5.46	688.5	0	-688.5	0	0
MSMEG_3505	-	6-aminohexanoate-cyclic-dimer hydrolase	9	82.4	0	-6.38	741.5	0	-741.5	0	0
MSMEG_3640	glcB	malate synthase G	16	147.9	10	-3.88	2365.6	160.42	-2205.2	0	0
MSMEG_3641	-	hypothetical protein MSMEG_3641	25	120.8	4.3	-4.82	3018.8	106.95	-2911.9	0	0
MSMEG_3656	-	ABC transporter, permease/ATP-binding protein	22	51.4	1.2	-5.4	1129.9	26.74	-1103.1	0	0
MSMEG_3783	-	acyl-CoA dehydrogenase	12	110.3	2.2	-5.63	1324.1	26.74	-1297.3	0	0
MSMEG_3832	-	4-hydroxyacetophenone monooxygenase	23	93.6	7	-3.75	2153.8	160.42	-1993.4	0	0
MSMEG_3884c	-	hypothetical protein MSMEG_3884	19	63.2	1.4	-5.49	1200.5	26.74	-1173.7	0	0
MSMEG_3954	-	trehalose 6-phosphate phosphorylase	43	44.3	3.7	-3.57	1906.6	160.42	-1746.2	0	0
MSMEG_4130c	-	polysaccharide deacetylase family protein	16	67.3	0	-6.09	1076.9	0	-1076.9	0	0
MSMEG_4295c	-	hydrolase, alpha/beta fold family protein	17	156.8	12.6	-3.64	2665.8	213.89	-2451.9	0	0
MSMEG_4389	-	monooxygenase, NtaA/SnaA/SoxA family protein	17	62.3	9.4	-2.72	1059.2	160.42	-898.8	0	0
MSMEG_4745c	-	ErfK/YbiS/YcfS/YnhG family protein	18	154	0	-7.28	2771.7	0	-2771.7	0	0
MSMEG_4762	-	ABC transporter binding protein	19	98.5	7	-3.81	1871.3	133.68	-1737.6	0	0
MSMEG_4786c	-	virulence factor mce family protein	16	58.5	0	-5.89	935.7	0	-935.7	0	0
MSMEG_4886	-	major facilitator family protein transporter	16	61.8	0	-5.97	988.6	0	-988.6	0	0
MSMEG_5076	-	ABC transporter membrane-spanning protein	14	88.3	11.5	-2.95	1235.8	160.42	-1075.4	0	0
MSMEG_5124	-	2,4-dienoyl-CoA reductase	19	90.1	4.2	-4.42	1712.4	80.21	-1632.2	0	0
MSMEG_5251c	-	hypothetical protein MSMEG_5251	19	174.7	18.3	-3.26	3319	347.57	-2971.4	0	0
MSMEG_5268c	-	hypothetical protein MSMEG_5268	18	54.9	0	-5.81	988.6	0	-988.6	0	0
MSMEG_5318c	-	glutamine ABC transporter, permease/substrate-binding protein	17	83.1	1.6	-5.72	1412.3	26.74	-1385.6	0	0
MSMEG_5341	-	dipeptidyl aminopeptidase/acylaminoacyl peptidase	16	141.2	13.4	-3.4	2259.7	213.89	-2045.8	0	0
MSMEG_5348	-	medium-chain fatty acid-CoA ligase	14	104.7	0	-6.72	1465.3	0	-1465.3	0	0
MSMEG_5591	-	hypothetical protein MSMEG_5591	15	64.7	0	-6.04	971	0	-971	0	0
MSMEG_6147	-	hypothetical protein MSMEG_6147	39	38	0	-5.29	1482.9	0	-1482.9	0	0
MSMEG_6201	-	transglycosylase	25	376.4	20.3	-4.21	9409.6	507.99	-8901.6	0	0
MSMEG_6255c	-	hypothetical protein MSMEG_6255	20	240.1	20.1	-3.58	4801.9	401.05	-4400.8	0	0
MSMEG_6261	-	glutamine amidotransferase, class II	9	78.5	0	-6.31	706.2	0	-706.2	0	0
MSMEG_6363c	-	cysteine desulfurase family protein	13	214.6	8.2	-4.7	2789.3	106.95	-2682.4	0	0
MSMEG_6450	-	hypothetical protein MSMEG_6450	23	56	4.6	-3.59	1288.7	106.95	-1181.8	0	0
MSMEG_6529	-	hypothetical protein MSMEG_6529	9	96.1	0	-6.6	865	0	-865	0	0
MSMEG_6622	-	cytochrome P450 monooxygenase	12	100	2.2	-5.49	1200.5	26.74	-1173.7	0	0
MSMEG_6642	-	caib/baif family protein	15	234.2	19.6	-3.58	3513.2	294.1	-3219	0	0
MSMEG_6656c	-	hypothetical protein MSMEG_6656	18	47.1	0	-5.59	847.4	0	-847.4	0	0
MSMEG_6668	-	ABC transporter, periplasmic substrate-binding protein, putative	18	44.1	0	-5.5	794.4	0	-794.4	0	0
MSMEG_6711c	-	4-hydroxybenzoate transporter	15	67.1	1.8	-5.23	1006.3	26.74	-979.5	0	0
MSMEG_6768c	-	halogenase	17	98.7	4.7	-4.39	1677.1	80.21	-1596.9	0	0
MSMEG_0650	-	GntR-family protein transcriptional regulator	10	102.4	0	-6.69	1023.9	0	-1023.9	0.0001	0.00781
MSMEG_0769	metZ	O-succinylhomoserine sulfhydrylase	13	148	2.1	-6.17	1924.3	26.74	-1897.6	0.0001	0.00781
MSMEG_0935	-	2,3-bisphosphoglycerate-dependent phosphoglycerate mutase	11	78.6	0	-6.32	865	0	-865	0.0001	0.00781
MSMEG_1162	-	nitrilotriacetate monooxygenase component A	18	26.5	0	-4.78	476.7	0	-476.7	0.0001	0.00781
MSMEG_1304	-	rhizopine catabolism protein	14	98.4	5.7	-4.1	1377	80.21	-1296.8	0.0001	0.00781
MSMEG_1658	-	ribonuclease, putative	8	216.3	10	-4.43	1730.1	80.21	-1649.9	0.0001	0.00781
MSMEG_2052c	nuoL	NADH dehydrogenase subunit L	20	65.3	2.7	-4.61	1306.4	53.47	-1252.9	0.0001	0.00781
MSMEG_2549	-	major facilitator superfamily protein	20	32.7	1.3	-4.61	653.2	26.74	-626.5	0.0001	0.00781
MSMEG_2949	-	carbon-monoxide dehydrogenase	22	73.8	8.5	-3.12	1624.2	187.16	-1437	0.0001	0.00781
MSMEG_3048	pyrF	orotidine 5'-phosphate decarboxylase	7	55.5	0	-5.82	388.4	0	-388.4	0.0001	0.00781
MSMEG_3094c	-	oxidoreductase, zinc-binding dehydrogenase family protein	10	107.7	5.3	-4.33	1076.9	53.47	-1023.4	0.0001	0.00781
MSMEG_3296	-	ECF-family protein sigma factor H	9	90.2	0	-6.51	812.1	0	-812.1	0.0001	0.00781
MSMEG_3348	-	extracellular solute-binding protein, family protein 7	20	74.1	5.3	-3.79	1482.9	106.95	-1376	0.0001	0.00781
MSMEG_4123	-	3-hydroxyisobutyrate dehydrogenase	14	51.7	0	-5.72	723.8	0	-723.8	0.0001	0.00781
MSMEG_4459	speB	agmatinase	11	149.3	14.6	-3.36	1641.8	160.42	-1481.4	0.0001	0.00781
MSMEG_4561c	-	ABC Fe3+-siderophores transporter, periplasmic binding protein	9	107.9	0	-6.77	971	0	-971	0.0001	0.00781
MSMEG_4652	-	D-oliose 4-ketoreductase	12	54.4	2.2	-4.61	653.2	26.74	-626.5	0.0001	0.00781
MSMEG_4696	-	alpha-amylase family protein	11	200.6	19.4	-3.37	2206.8	213.89	-1992.9	0.0001	0.00781
MSMEG_6224c	-	retinal pigment epithelial membrane protein	24	100	12.3	-3.03	2400.9	294.1	-2106.8	0.0001	0.00781
MSMEG_6647	-	methylcitrate synthase	15	103.6	5.3	-4.28	1553.6	80.21	-1473.3	0.0001	0.00781
MSMEG_0032c	-	cell cycle protein, FtsW/RodA/SpoVE family protein	17	112.2	4.7	-4.57	1906.6	80.21	-1826.4	0.0002	0.01232
MSMEG_0289	-	alpha/beta hydrolase fold family protein	12	89.7	2.2	-5.33	1076.9	26.74	-1050.2	0.0002	0.01232
MSMEG_1325c	recD	exodeoxyribonuclease V, alpha subunit	12	100	8.9	-3.49	1200.5	106.95	-1093.5	0.0002	0.01232
MSMEG_1882	-	acyltransferase, ws/dgat/mgat subfamily protein	16	293.5	25.1	-3.55	4696	401.05	-4294.9	0.0002	0.01232
MSMEG_2249	-	hypothetical protein MSMEG_2249	10	84.7	2.7	-4.99	847.4	26.74	-820.7	0.0002	0.01232
MSMEG_2375c	wrbA	NAD(P)H:quinone oxidoreductase, type IV	7	123.6	3.8	-5.02	865	26.74	-838.3	0.0002	0.01232
MSMEG_2860	-	virulence factor mce family protein	13	81.5	0	-6.37	1059.2	0	-1059.2	0.0002	0.01232
MSMEG_3309	-	tryptophan synthase subunit beta	19	55.7	7	-2.99	1059.2	133.68	-925.6	0.0002	0.01232
MSMEG_3396c	-	transcriptional regulator, IclR family protein	11	73.8	2.4	-4.92	812.1	26.74	-785.3	0.0002	0.01232
MSMEG_3951c	-	hypothetical protein MSMEG_3951	14	39.1	0	-5.33	547.3	0	-547.3	0.0002	0.01232
MSMEG_4411c	-	oxidoreductase FAD-binding region	9	184.4	11.9	-3.96	1659.5	106.95	-1552.5	0.0002	0.01232
MSMEG_4551c	-	monoxygenase	18	51	1.5	-5.1	918	26.74	-891.3	0.0002	0.01232
MSMEG_4739c	-	hypothetical protein MSMEG_4739	9	72.6	0	-6.2	653.2	0	-653.2	0.0002	0.01232
MSMEG_4998c	-	hydrolase, alpha/beta fold family protein	15	109.5	3.6	-4.94	1641.8	53.47	-1588.4	0.0002	0.01232
MSMEG_5346c	-	TetR-family protein transcriptional regulator	11	94.7	2.4	-5.28	1041.6	26.74	-1014.9	0.0002	0.01232
MSMEG_5644c	-	membrane protein	13	171.1	4.1	-5.38	2224.4	53.47	-2170.9	0.0002	0.01232
MSMEG_5693	-	transporter, major facilitator family protein	14	254.7	13.4	-4.25	3566.1	187.16	-3379	0.0002	0.01232
MSMEG_5775	-	LytR/CpsA/Psr family protein	16	243.8	16.7	-3.87	3901.5	267.36	-3634.2	0.0002	0.01232
MSMEG_5878c	-	serine esterase, cutinase family protein	9	235.4	3	-6.31	2118.5	26.74	-2091.7	0.0002	0.01232
MSMEG_6412c	-	hypothetical protein MSMEG_6412	11	158.9	2.4	-6.03	1747.7	26.74	-1721	0.0002	0.01232
MSMEG_6414	-	hypothetical protein MSMEG_6414	7	350.6	22.9	-3.94	2453.9	160.42	-2293.5	0.0002	0.01232
MSMEG_6514c	-	trehalose synthase-fused maltokinase	17	66.5	4.7	-3.82	1129.9	80.21	-1049.6	0.0002	0.01232
MSMEG_6562c	-	putative acyl-CoA dehydrogenase	16	59.6	3.3	-4.16	953.3	53.47	-899.8	0.0002	0.01232
MSMEG_1153	-	FAD dependent oxidoreductase	18	53.9	1.5	-5.18	971	26.74	-944.2	0.0003	0.01562
MSMEG_1461	-	5-oxovalerate dehydrogenase	9	58.8	5.9	-3.31	529.6	53.47	-476.1	0.0003	0.01562
MSMEG_1749c	-	putative monooxygenase	10	128.9	0	-7.02	1288.7	0	-1288.7	0.0003	0.01562
MSMEG_1785	-	hypothetical protein MSMEG_1785	19	132.9	14.1	-3.24	2524.5	267.36	-2257.2	0.0003	0.01562
MSMEG_2187	-	urea amidolyase	19	48.3	5.6	-3.1	918	106.95	-811.1	0.0003	0.01562
MSMEG_2969	-	NADH:flavin oxidoreductase/NADH oxidase	12	32.4	0	-5.06	388.4	0	-388.4	0.0003	0.01562
MSMEG_3039c	-	monooxygenase	20	58.3	5.3	-3.45	1165.2	106.95	-1058.2	0.0003	0.01562
MSMEG_3227	pyk	pyruvate kinase	10	93.6	0	-6.56	935.7	0	-935.7	0.0003	0.01562
MSMEG_3490c	-	putative membrane acyltransferase	13	214.6	30.8	-2.8	2789.3	401.05	-2388.3	0.0003	0.01562
MSMEG_3981c	-	L-carnitine dehydratase/bile acid-inducible protein F	18	74.5	5.9	-3.65	1341.7	106.95	-1234.8	0.0003	0.01562
MSMEG_4014	-	N-carbamoyl-L-amino acid amidohydrolase	14	94.6	5.7	-4.05	1324.1	80.21	-1243.8	0.0003	0.01562
MSMEG_4138	-	aliphatic nitrilase	12	170.7	13.4	-3.67	2047.9	160.42	-1887.4	0.0003	0.01562
MSMEG_4495c	-	CBS domain-containing protein	10	61.8	5.3	-3.53	617.9	53.47	-564.4	0.0003	0.01562
MSMEG_5404	-	propionate--CoA ligase	26	180.6	28.8	-2.65	4696	748.62	-3947.3	0.0003	0.01562
MSMEG_5529	-	hypothetical protein MSMEG_5529	8	143.4	0	-7.17	1147.5	0	-1147.5	0.0003	0.01562
MSMEG_5641c	-	glycosyl transferase, group 1 family protein	18	48.1	3	-4.02	865	53.47	-811.6	0.0003	0.01562
MSMEG_5753	-	serine/threonine specific protein phosphatase	8	99.3	3.3	-4.89	794.4	26.74	-767.7	0.0003	0.01562
MSMEG_5897c	-	virulence factor mce family protein	11	234.3	29.2	-3.01	2577.5	320.84	-2256.6	0.0003	0.01562
MSMEG_6310c	-	4-hydroxybutyrate coenzyme A transferase	10	181.8	16	-3.5	1818.4	160.42	-1657.9	0.0003	0.01562
MSMEG_6410	-	Rieske 2Fe-2S family protein	20	138.6	26.7	-2.37	2771.7	534.73	-2237	0.0003	0.01562
MSMEG_2547c	-	transcriptional regulator	8	214.1	0	-7.75	1712.4	0	-1712.4	0.0004	0.0202
MSMEG_3344c	-	hypothetical protein MSMEG_3344	25	101.7	16	-2.66	2542.2	401.05	-2141.1	0.0004	0.0202
MSMEG_3976c	-	DNA-binding protein	13	59.8	2.1	-4.86	776.8	26.74	-750	0.0004	0.0202
MSMEG_4269	asnB	asparagine synthase (glutamine-hydrolyzing)	20	20.3	0	-4.41	406	0	-406	0.0004	0.0202
MSMEG_0012	-	ferric enterobactin transport system permease protein FepD	9	60.8	3	-4.36	547.3	26.74	-520.5	0.0005	0.02332
MSMEG_0034c	-	FHA domain-containing protein	10	132.4	16	-3.05	1324.1	160.42	-1163.6	0.0005	0.02332
MSMEG_0137	-	virulence factor mce family protein	14	55.5	3.8	-3.86	776.8	53.47	-723.3	0.0005	0.02332
MSMEG_0164c	-	transmembrane transport protein	19	79.9	4.2	-4.24	1518.2	80.21	-1438	0.0005	0.02332
MSMEG_0894	-	dihydrodipicolinate reductase	23	130.5	18.6	-2.81	3001.2	427.78	-2573.4	0.0005	0.02332
MSMEG_1930c	-	DEAD/DEAH box helicase	13	108.6	6.2	-4.14	1412.3	80.21	-1332.1	0.0005	0.02332
MSMEG_2070c	-	acyl-CoA dehydrogenase family protein	11	75.4	4.9	-3.96	829.7	53.47	-776.3	0.0005	0.02332
MSMEG_4296c	-	protease	15	240.1	53.5	-2.17	3601.4	802.09	-2799.3	0.0005	0.02332
MSMEG_4461c	-	hypothetical protein MSMEG_4461	11	157.3	21.9	-2.85	1730.1	240.63	-1489.5	0.0005	0.02332
MSMEG_4573c	-	competence protein	8	59.6	0	-5.92	476.7	0	-476.7	0.0005	0.02332
MSMEG_6607c	-	hypothetical protein MSMEG_6607	9	115.7	0	-6.87	1041.6	0	-1041.6	0.0005	0.02332
MSMEG_0435c	-	allophanate hydrolase subunit 2	9	127.5	3	-5.42	1147.5	26.74	-1120.8	0.0006	0.02634
MSMEG_1144	-	virulence factor Mce family protein	10	81.2	2.7	-4.92	812.1	26.74	-785.3	0.0006	0.02634
MSMEG_1367	rpoB	DNA-directed RNA polymerase subunit beta	32	1.1	263.2	7.9	35.3	8422	8386.7	0.0006	0.02634
MSMEG_1710c	-	ribose transport system permease protein RbsC	9	56.9	0	-5.86	512	0	-512	0.0006	0.02634
MSMEG_2230	-	amidohydrolase family protein	16	68.4	10	-2.77	1094.5	160.42	-934.1	0.0006	0.02634
MSMEG_2460	-	transporter permease 1	13	59.8	0	-5.92	776.8	0	-776.8	0.0006	0.02634
MSMEG_3826	-	hypothetical protein MSMEG_3826	9	70.6	0	-6.16	635.5	0	-635.5	0.0006	0.02634
MSMEG_3989	-	peptidase M20D, amidohydrolase	12	53	2.2	-4.57	635.5	26.74	-608.8	0.0006	0.02634
MSMEG_6020c	-	D-xylose-binding periplasmic protein	7	128.6	3.8	-5.07	900.4	26.74	-873.6	0.0006	0.02634
MSMEG_1307c	-	EthD protein	6	97.1	0	-6.62	582.6	0	-582.6	0.0007	0.02832
MSMEG_1784c	-	type I topoisomerase	17	136	15.7	-3.11	2312.7	267.36	-2045.3	0.0007	0.02832
MSMEG_2109	-	hypothetical protein MSMEG_2109	14	63.1	1.9	-5.05	882.7	26.74	-856	0.0007	0.02832
MSMEG_3401	-	LamB/YcsF family protein	11	130	4.9	-4.74	1430	53.47	-1376.5	0.0007	0.02832
MSMEG_3676	-	phenoxybenzoate dioxygenase beta subunit	11	102.7	14.6	-2.82	1129.9	160.42	-969.4	0.0007	0.02832
MSMEG_3874	-	transcriptional regulator, TetR family protein	8	198.6	20.1	-3.31	1588.9	160.42	-1428.4	0.0007	0.02832
MSMEG_4256c	-	NLP/P60 family protein	13	253.9	16.5	-3.95	3301.3	213.89	-3087.4	0.0007	0.02832
MSMEG_4458	-	transmembrane transport protein	12	53	2.2	-4.57	635.5	26.74	-608.8	0.0007	0.02832
MSMEG_5255c	-	hypothetical protein MSMEG_5255	7	216.9	19.1	-3.51	1518.2	133.68	-1384.6	0.0007	0.02832
MSMEG_5512c	-	magnesium chelatase	10	222.4	2.7	-6.38	2224.4	26.74	-2197.7	0.0007	0.02832
MSMEG_5995c	-	P450 heme-thiolate protein	10	137.7	5.3	-4.69	1377	53.47	-1323.5	0.0007	0.02832
MSMEG_6321c	-	glycerol dehydratase large subunit	17	40.5	1.6	-4.69	688.5	26.74	-661.8	0.0007	0.02832
MSMEG_6695c	-	cytochrome P450	10	70.6	0	-6.16	706.2	0	-706.2	0.0007	0.02832
MSMEG_0150c	-	NAD(P) transhydrogenase beta subunit	12	58.8	0	-5.9	706.2	0	-706.2	0.0008	0.03002
MSMEG_0302c	-	peptidase, S9A/B/C families	17	27	1.6	-4.1	459	26.74	-432.3	0.0008	0.03002
MSMEG_0355	-	hypothetical protein MSMEG_0355	5	204.8	5.3	-5.26	1023.9	26.74	-997.2	0.0008	0.03002
MSMEG_1154	-	formyl-coenzyme A transferase	12	64.7	0	-6.04	776.8	0	-776.8	0.0008	0.03002
MSMEG_1207	-	glycosyltransferase, group I	11	117.2	0	-6.88	1288.7	0	-1288.7	0.0008	0.03002
MSMEG_2231	-	acyl-CoA synthetase	14	59.3	1.9	-4.96	829.7	26.74	-803	0.0008	0.03002
MSMEG_2810	-	major facilitator superfamily protein	12	113.3	2.2	-5.67	1359.4	26.74	-1332.6	0.0008	0.03002
MSMEG_3742c	scpA	segregation and condensation protein A	8	50.8	0	-5.69	406	0	-406	0.0008	0.03002
MSMEG_4590c	ssuD	nitrilotriacetate monooxygenase component A	12	36.8	0	-5.24	441.4	0	-441.4	0.0008	0.03002
MSMEG_4699c	-	NAD-glutamate dehydrogenase	46	128.2	35.5	-1.85	5896.4	1630.93	-4265.5	0.0008	0.03002
MSMEG_4778	-	putative thiolase	11	126.8	7.3	-4.12	1394.7	80.21	-1314.5	0.0008	0.03002
MSMEG_4870	-	FAD binding domain-containing protein	17	80	11	-2.86	1359.4	187.16	-1172.2	0.0008	0.03002
MSMEG_6689	-	CAIB/BAIF family protein	11	24.1	0	-4.65	264.8	0	-264.8	0.0008	0.03002
MSMEG_0452c	-	inner membrane permease YgbN	10	118.3	8	-3.88	1182.8	80.21	-1102.6	0.0009	0.03215
MSMEG_1499	-	oxygenase	9	137.3	3	-5.53	1235.8	26.74	-1209	0.0009	0.03215
MSMEG_1735	-	flavoprotein disulfide reductase	11	122	7.3	-4.06	1341.7	80.21	-1261.5	0.0009	0.03215
MSMEG_2099c	-	ABC transporter, substrate binding protein	11	85.1	12.2	-2.81	935.7	133.68	-802	0.0009	0.03215
MSMEG_2439c	-	LppW protein	7	80.7	0	-6.35	564.9	0	-564.9	0.0009	0.03215
MSMEG_2869c	-	3-ketosteroid-delta-1-dehydrogenase	22	48.9	3.6	-3.75	1076.9	80.21	-996.7	0.0009	0.03215
MSMEG_2952	-	transport gene	13	118.1	20.6	-2.52	1535.9	267.36	-1268.5	0.0009	0.03215
MSMEG_4723c	-	hypothetical protein MSMEG_4723	9	253	23.8	-3.41	2277.4	213.89	-2063.5	0.0009	0.03215
MSMEG_5760	-	GntR-family protein regulator	16	60.7	3.3	-4.18	971	53.47	-917.5	0.0009	0.03215
MSMEG_0412	-	hypothetical protein MSMEG_0412	18	292.3	46	-2.67	5260.9	828.83	-4432.1	0.001	0.03462
MSMEG_2212	-	short chain dehydrogenase	10	70.6	8	-3.14	706.2	80.21	-626	0.001	0.03462
MSMEG_4001	-	ribose transport system permease protein RbsC	15	33	0	-5.09	494.3	0	-494.3	0.001	0.03462
MSMEG_5220c	-	esterase/lipase/thioesterase	12	256	37.9	-2.76	3071.8	454.52	-2617.3	0.001	0.03462
MSMEG_5573c	-	sugar ABC transporter permease protein	11	171.7	31.6	-2.44	1889	347.57	-1541.4	0.001	0.03462
MSMEG_6773	-	CaiB/BaiF family protein	12	88.3	2.2	-5.31	1059.2	26.74	-1032.5	0.001	0.03462
MSMEG_1932c	-	MmpS3 protein	14	176.5	26.7	-2.72	2471.6	374.31	-2097.3	0.0011	0.03789
MSMEG_0685c	-	oxidoreductase, molybdopterin-binding subunit	8	55.2	0	-5.81	441.4	0	-441.4	0.0012	0.0401
MSMEG_0975	-	hypothetical protein MSMEG_0975	9	229.5	23.8	-3.27	2065.5	213.89	-1851.6	0.0012	0.0401
MSMEG_1959	-	hypothetical protein MSMEG_1959	58	60.6	20.7	-1.55	3513.2	1203.14	-2310	0.0012	0.0401
MSMEG_1997	-	N-acyl-D-glutamate amidohydrolase	14	74.4	7.6	-3.28	1041.6	106.95	-934.6	0.0012	0.0401
MSMEG_4441c	-	cupin domain-containing protein	10	75.9	2.7	-4.83	759.1	26.74	-732.4	0.0012	0.0401
MSMEG_6187c	nth	endonuclease III	6	70.6	0	-6.16	423.7	0	-423.7	0.0012	0.0401
MSMEG_0473	-	transcriptional regulator, LuxR family protein	8	121.4	0	-6.94	971	0	-971	0.0013	0.04259
MSMEG_4118c	-	acyl-CoA dehydrogenase	13	44.8	2.1	-4.45	582.6	26.74	-555.8	0.0013	0.04259
MSMEG_5494	-	acyl-CoA dehydrogenase fadE12	12	83.9	8.9	-3.23	1006.3	106.95	-899.3	0.0013	0.04259
MSMEG_6431	-	hypothetical protein MSMEG_6431	6	200.1	13.4	-3.9	1200.5	80.21	-1120.3	0.0013	0.04259
MSMEG_1489	-	hypothetical protein MSMEG_1489	11	70.6	2.4	-4.86	776.8	26.74	-750	0.0014	0.04456
MSMEG_1606	-	benzoylformate decarboxylase	20	45	1.3	-5.07	900.4	26.74	-873.6	0.0014	0.04456
MSMEG_2786c	-	hydrolase, alpha/beta fold family protein	11	187.8	2.4	-6.27	2065.5	26.74	-2038.8	0.0014	0.04456
MSMEG_3837c	-	hypothetical protein MSMEG_3837	8	141.2	3.3	-5.4	1129.9	26.74	-1103.1	0.0014	0.04456
MSMEG_4352c	-	putative secreted protein	12	33.8	2.2	-3.92	406	26.74	-379.3	0.0014	0.04456
MSMEG_4923c	-	hypothetical protein MSMEG_4923	8	123.6	0	-6.96	988.6	0	-988.6	0.0014	0.04456
MSMEG_1704	-	ABC transporter	17	66.5	1.6	-5.4	1129.9	26.74	-1103.1	0.0015	0.04686
MSMEG_4852c	-	enoyl-CoA hydratase, putative	12	38.3	2.2	-4.1	459	26.74	-432.3	0.0015	0.04686
MSMEG_5570c	-	ATP-dependent DNA ligase	29	86.4	21.2	-2.03	2506.9	614.94	-1891.9	0.0015	0.04686
MSMEG_6371	-	GntR-family protein regulator	11	112.3	4.9	-4.53	1235.8	53.47	-1182.3	0.0015	0.04686
MSMEG_0263	-	amidohydrolase 3	13	43.5	0	-5.47	564.9	0	-564.9	0.0016	0.04797
MSMEG_0314c	zwf	glucose-6-phosphate 1-dehydrogenase	15	143.6	28.5	-2.33	2153.8	427.78	-1726	0.0016	0.04797
MSMEG_0531c	-	putative acyl-CoA dehydrogenase	8	222.9	20.1	-3.47	1783.1	160.42	-1622.6	0.0016	0.04797
MSMEG_0939	-	Ppx/GppA phosphatase family protein	7	100.9	11.5	-3.14	706.2	80.21	-626	0.0016	0.04797
MSMEG_2425	amt	ammonium transporter	19	82.7	4.2	-4.29	1571.2	80.21	-1491	0.0016	0.04797
MSMEG_3530c	-	hypothetical protein MSMEG_3530	11	105.9	9.7	-3.45	1165.2	106.95	-1058.2	0.0016	0.04797
MSMEG_4384	-	penicillin binding protein transpeptidase domain-containing protein	32	91	15.9	-2.52	2912.9	507.99	-2404.9	0.0016	0.04797
MSMEG_4418c	msrB	methionine-R-sulfoxide reductase	9	43.2	0	-5.46	388.4	0	-388.4	0.0016	0.04797
MSMEG_5402c	-	dehydrogenase DhgA	8	64	0	-6.02	512	0	-512	0.0016	0.04797
MSMEG_0624	-	subtilase family protein	11	59.4	2.4	-4.61	653.2	26.74	-626.5	0.0017	0.04879
MSMEG_0628c	-	amidohydrolase family protein	16	67.3	5	-3.75	1076.9	80.21	-996.7	0.0017	0.04879
MSMEG_1256	-	hypothetical protein MSMEG_1256	7	37.8	3.8	-3.31	264.8	26.74	-238.1	0.0017	0.04879
MSMEG_1611	-	transcriptional regulator, TetR family protein, putative	5	84.7	0	-6.42	423.7	0	-423.7	0.0017	0.04879
MSMEG_1977	-	alcohol dehydrogenase	9	56.9	0	-5.86	512	0	-512	0.0017	0.04879
MSMEG_2727c	-	glutamate binding protein	11	184.6	7.3	-4.66	2030.2	80.21	-1950	0.0017	0.04879
MSMEG_3993c	-	Asp/Glu racemase	12	38.3	0	-5.29	459	0	-459	0.0017	0.04879
MSMEG_4664	-	IolD protein	25	38.1	5.3	-2.83	953.3	133.68	-819.6	0.0017	0.04879
MSMEG_6661	-	O-methyltransferase, putative	8	64	3.3	-4.26	512	26.74	-485.2	0.0017	0.04879
MSMEG_6914c	-	hypothetical protein MSMEG_6914	15	109.5	14.3	-2.94	1641.8	213.89	-1427.9	0.0017	0.04879
MSMEG_0035c	-	FHA domain-containing protein	48	39.4	1.7	-4.56	1889	80.21	-1808.8	0.0018	0.05079
MSMEG_0367c	-	O-demethylpuromycin-O-methyltransferase	9	196.2	14.9	-3.72	1765.4	133.68	-1631.7	0.0018	0.05079
MSMEG_0600	-	dehydrogenase	8	79.4	3.3	-4.57	635.5	26.74	-608.8	0.0018	0.05079
MSMEG_2374	ilvC	ketol-acid reductoisomerase	10	44.1	2.7	-4.05	441.4	26.74	-414.6	0.0018	0.05079
MSMEG_0102c	-	putative acyl-CoA dehydrogenase	6	264.8	13.4	-4.31	1588.9	80.21	-1508.7	0.0019	0.05166
MSMEG_0347	-	virulence factor Mce family protein	13	58.4	2.1	-4.83	759.1	26.74	-732.4	0.0019	0.05166
MSMEG_1452	-	sulfatase-modifying factor 1	10	31.8	0	-5.03	317.8	0	-317.8	0.0019	0.05166
MSMEG_2564	-	oxidoreductase, zinc-binding dehydrogenase family protein	9	70.6	5.9	-3.57	635.5	53.47	-582.1	0.0019	0.05166
MSMEG_2691c	-	N-acetylglutamate synthase	6	220.7	13.4	-4.05	1324.1	80.21	-1243.8	0.0019	0.05166
MSMEG_3084	gap	glyceraldehyde-3-phosphate dehydrogenase, type I	12	63.3	2.2	-4.83	759.1	26.74	-732.4	0.0019	0.05166
MSMEG_3163c	-	gp55 protein	14	162.7	28.6	-2.51	2277.4	401.05	-1876.3	0.0019	0.05166
MSMEG_4044c	-	GAF domain-containing protein	24	116.2	31.2	-1.9	2789.3	748.62	-2040.7	0.0019	0.05166
MSMEG_5280c	-	cysteine dioxygenase type I superfamily protein	6	53	0	-5.75	317.8	0	-317.8	0.0019	0.05166
MSMEG_0743	-	xanthine dehydrogenase	8	147.9	0	-7.22	1182.8	0	-1182.8	0.002	0.0533
MSMEG_2659c	ald	alanine dehydrogenase	10	79.4	8	-3.31	794.4	80.21	-714.2	0.002	0.0533
MSMEG_4165c	-	[NAD+] benzaldehyde dehydrogenase [Mycobacterium smegmatis str. MC2 155]	11	83.5	2.4	-5.1	918	26.74	-891.3	0.002	0.0533
MSMEG_5742c	-	acyltransferase domain-containing protein	12	239.8	24.5	-3.29	2877.6	294.1	-2583.5	0.002	0.0533
MSMEG_6608c	-	hypothetical protein MSMEG_6608	10	111.2	13.4	-3.06	1112.2	133.68	-978.5	0.002	0.0533
MSMEG_4335	-	diacylglycerol kinase	8	59.6	3.3	-4.16	476.7	26.74	-449.9	0.0021	0.05531
MSMEG_4541	-	ABC transporter, ATP-binding protein	12	19.1	0	-4.33	229.5	0	-229.5	0.0021	0.05531
MSMEG_5020c	-	acetoin(diacetyl) reductase	8	150.1	10	-3.9	1200.5	80.21	-1120.3	0.0021	0.05531
MSMEG_0114	-	extracellular solute-binding protein, family protein 3	7	121.1	3.8	-4.99	847.4	26.74	-820.7	0.0022	0.05661
MSMEG_0306	-	arylamine N-acetyltransferase	9	62.8	0	-5.99	564.9	0	-564.9	0.0022	0.05661
MSMEG_0613	-	hypothetical protein MSMEG_0613	10	266.6	40.1	-2.73	2665.8	401.05	-2264.7	0.0022	0.05661
MSMEG_2165	-	transketolase, N- subunit	8	75	6.7	-3.49	600.2	53.47	-546.8	0.0022	0.05661
MSMEG_4241	-	integral membrane protein	15	28.2	0	-4.87	423.7	0	-423.7	0.0022	0.05661
MSMEG_6824c	-	MarR-family protein regulatory protein	8	105.9	6.7	-3.99	847.4	53.47	-793.9	0.0022	0.05661
MSMEG_3085	pgk	phosphoglycerate kinase	9	92.2	3	-4.96	829.7	26.74	-803	0.0023	0.05829
MSMEG_3947c	-	6-phosphofructokinase isozyme 2	12	35.3	0	-5.18	423.7	0	-423.7	0.0023	0.05829
MSMEG_4895c	-	hypothetical protein MSMEG_4895	5	102.4	0	-6.69	512	0	-512	0.0023	0.05829
MSMEG_5765c	-	globin	6	88.3	0	-6.48	529.6	0	-529.6	0.0023	0.05829
MSMEG_0506	-	ABC transporter, permease protein	11	40.1	2.4	-4.05	441.4	26.74	-414.6	0.0024	0.05948
MSMEG_0662	-	putrescine transport ATP-binding protein PotG	10	97.1	5.3	-4.18	971	53.47	-917.5	0.0024	0.05948
MSMEG_0665c	-	sarcosine oxidase subunit beta, putative	12	44.1	2.2	-4.31	529.6	26.74	-502.9	0.0024	0.05948
MSMEG_4521	-	Tat (twin-arginine translocation) pathway signal sequence	12	35.3	0	-5.18	423.7	0	-423.7	0.0024	0.05948
MSMEG_5898c	-	virulence factor Mce family protein	10	88.3	8	-3.46	882.7	80.21	-802.5	0.0024	0.05948
MSMEG_6649c	-	hypothetical protein MSMEG_6649	7	136.2	3.8	-5.16	953.3	26.74	-926.6	0.0024	0.05948
MSMEG_0811	-	oxidoreductase	10	93.6	8	-3.54	935.7	80.21	-855.5	0.0025	0.0604
MSMEG_1148	-	mce related protein	16	47.4	0	-5.6	759.1	0	-759.1	0.0025	0.0604
MSMEG_2199c	-	hypothetical protein MSMEG_2199	12	114.8	6.7	-4.1	1377	80.21	-1296.8	0.0025	0.0604
MSMEG_3451c	-	short-chain dehydrogenase/reductase	7	100.9	7.6	-3.72	706.2	53.47	-652.7	0.0025	0.0604
MSMEG_4787c	-	virulence factor mce family protein	11	38.5	2.4	-3.99	423.7	26.74	-397	0.0025	0.0604
MSMEG_6730	-	putative oxidoreductase YdbC	6	64.7	0	-6.04	388.4	0	-388.4	0.0025	0.0604
MSMEG_6839	-	transcriptional regulator, AraC family protein	10	97.1	5.3	-4.18	971	53.47	-917.5	0.0025	0.0604
MSMEG_3561c	glnA	glutamine synthetase catalytic domain	11	77	4.9	-3.99	847.4	53.47	-793.9	0.0027	0.06499
MSMEG_3578	-	putative cyclase	32	136.3	35.9	-1.92	4360.5	1149.67	-3210.9	0.0028	0.06692
MSMEG_4492	-	amidase	8	134.6	6.7	-4.33	1076.9	53.47	-1023.4	0.0028	0.06692
MSMEG_0160	-	formate dehydrogenase, beta subunit	14	73.1	1.9	-5.26	1023.9	26.74	-997.2	0.0029	0.06786
MSMEG_1847c	-	4Fe-4S ferredoxin, iron-sulfur binding protein	11	65.8	4.9	-3.76	723.8	53.47	-670.3	0.0029	0.06786
MSMEG_2391c	ppk	polyphosphate kinase	15	108.3	16	-2.75	1624.2	240.63	-1383.5	0.0029	0.06786
MSMEG_4102	-	hypothetical protein MSMEG_4102	11	40.1	0	-5.36	441.4	0	-441.4	0.0029	0.06786
MSMEG_6376c	-	transcriptional regulator LacI family protein	11	125.2	4.9	-4.69	1377	53.47	-1323.5	0.0029	0.06786
MSMEG_6575	-	beta-lactamase	17	28	1.6	-4.16	476.7	26.74	-449.9	0.0029	0.06786
MSMEG_2999c	-	hypothetical protein MSMEG_2999	18	56.9	7.4	-2.94	1023.9	133.68	-890.3	0.003	0.06996
MSMEG_3392	-	acyl-CoA dehydrogenase domain-containing protein	7	58	0	-5.88	406	0	-406	0.0031	0.07204
MSMEG_0784	ackA	acetate kinase	13	104.6	18.5	-2.5	1359.4	240.63	-1118.7	0.0032	0.07385
MSMEG_5911	-	AraC family protein transcriptional regulator	9	60.8	0	-5.95	547.3	0	-547.3	0.0032	0.07385
MSMEG_0276c	-	aldehyde-alcohol dehydrogenase	13	63.8	10.3	-2.63	829.7	133.68	-696.1	0.0033	0.07564
MSMEG_4530c	cysA	sulfate ABC transporter, ATP-binding protein	10	93.6	5.3	-4.13	935.7	53.47	-882.2	0.0033	0.07564
MSMEG_0891	-	polyphosphate kinase 2	13	119.5	18.5	-2.69	1553.6	240.63	-1312.9	0.0034	0.07714
MSMEG_2619	-	efflux protein	13	205.1	41.1	-2.32	2665.8	534.73	-2131	0.0034	0.07714
MSMEG_5944	-	glucose-methanol-choline oxidoreductase	26	89.6	15.4	-2.54	2330.3	401.05	-1929.3	0.0034	0.07714
MSMEG_1143	-	mce related protein	11	43.3	0	-5.47	476.7	0	-476.7	0.0035	0.07862
MSMEG_3964	-	pyruvate dehydrogenase	18	53.9	11.9	-2.18	971	213.89	-757.1	0.0035	0.07862
MSMEG_6842	-	2,2-dialkylglycine decarboxylase	10	58.3	0	-5.89	582.6	0	-582.6	0.0035	0.07862
MSMEG_0512	-	BadF/BadG/BcrA/BcrD ATPase family protein	13	31.2	2.1	-3.92	406	26.74	-379.3	0.0036	0.07979
MSMEG_0794	-	hypothetical protein MSMEG_0794	5	74.1	5.3	-3.79	370.7	26.74	-344	0.0036	0.07979
MSMEG_4863c	-	hypothetical protein MSMEG_4863	14	84.5	7.6	-3.47	1182.8	106.95	-1075.9	0.0036	0.07979
MSMEG_5300c	-	short-chain type dehydrogenase/reductase	9	135.3	5.9	-4.51	1218.1	53.47	-1164.7	0.0036	0.07979
MSMEG_0176	-	glutamine ABC transporter periplasmic-binding protein	7	153.8	0	-7.27	1076.9	0	-1076.9	0.0037	0.08068
MSMEG_2055c	nuoI	NADH dehydrogenase subunit I	14	83.2	5.7	-3.86	1165.2	80.21	-1085	0.0037	0.08068
MSMEG_5511c	-	von Willebrand factor, type A	12	83.9	2.2	-5.23	1006.3	26.74	-979.5	0.0037	0.08068
MSMEG_5931c	-	short chain dehydrogenase	8	92.7	3.3	-4.79	741.5	26.74	-714.7	0.0037	0.08068
MSMEG_6574	-	hypothetical protein MSMEG_6574	6	82.4	4.5	-4.21	494.3	26.74	-467.6	0.0037	0.08068
MSMEG_1866c	-	transposase B	8	64	0	-6.02	512	0	-512	0.0038	0.08206
MSMEG_1943	-	ATP-dependent DNA helicase	20	38.8	1.3	-4.86	776.8	26.74	-750	0.0038	0.08206
MSMEG_6234	-	CBS domain-containing protein	20	98.9	20.1	-2.3	1977.3	401.05	-1576.2	0.0038	0.08206
MSMEG_3416	-	protein of unknown function DUF6, transmembrane, putative	8	77.2	3.3	-4.53	617.9	26.74	-591.2	0.0039	0.08291
MSMEG_6596c	-	hypothetical protein MSMEG_6596	9	266.8	47.5	-2.49	2400.9	427.78	-1973.2	0.0039	0.08291
MSMEG_0453c	aroK	shikimate kinase	6	111.8	4.5	-4.65	670.9	26.74	-644.1	0.004	0.08291
MSMEG_1854	-	valosin containing protein-1	12	98.6	15.6	-2.66	1182.8	187.16	-995.7	0.004	0.08291
MSMEG_2146	-	gp15 protein	39	118.1	36.3	-1.7	4607.7	1417.03	-3190.7	0.004	0.08291
MSMEG_2725c	-	glutamate transporter permease protein GluD	10	123.6	8	-3.95	1235.8	80.21	-1155.6	0.004	0.08291
MSMEG_2788	-	ATP/GTP-binding integral membrane protein	10	90	5.3	-4.07	900.4	53.47	-846.9	0.004	0.08291
MSMEG_3336c	-	hydrolase	12	72.1	8.9	-3.02	865	106.95	-758.1	0.004	0.08291
MSMEG_4281	-	leucyl aminopeptidase	9	56.9	3	-4.26	512	26.74	-485.2	0.004	0.08291
MSMEG_4417c	msrA	methionine sulfoxide reductase A	9	66.7	3	-4.49	600.2	26.74	-573.5	0.004	0.08291
MSMEG_4476	-	hypothetical protein MSMEG_4476	4	211.8	13.4	-3.99	847.4	53.47	-793.9	0.004	0.08291
MSMEG_5063	-	integral membrane protein	9	80.4	3	-4.76	723.8	26.74	-697.1	0.004	0.08291
MSMEG_5625c	-	cyclododecanone monooxygenase	27	90.2	21.8	-2.05	2436.3	588.2	-1848.1	0.004	0.08291
MSMEG_1024	-	hypothetical protein MSMEG_1024	5	141.2	0	-7.15	706.2	0	-706.2	0.0041	0.08344
MSMEG_2685	-	metallo-beta-lactamase superfamily protein	9	60.8	5.9	-3.36	547.3	53.47	-493.8	0.0041	0.08344
MSMEG_3909c	-	hypothetical protein MSMEG_3909	10	93.6	2.7	-5.13	935.7	26.74	-908.9	0.0041	0.08344
MSMEG_5022	-	flavin-containing monooxygenase FMO	22	81	14.6	-2.47	1783.1	320.84	-1462.2	0.0041	0.08344
MSMEG_5266c	-	RDD family protein	15	60	5.3	-3.49	900.4	80.21	-820.1	0.0041	0.08344
MSMEG_6687	-	aldehyde dehydrogenase, thermostable	7	60.5	0	-5.94	423.7	0	-423.7	0.0041	0.08344
MSMEG_1392	-	alcohol dehydrogenase, class IV	12	32.4	2.2	-3.86	388.4	26.74	-361.7	0.0042	0.08445
MSMEG_2033c	-	oxidoreductase, zinc-binding dehydrogenase family protein	7	42.9	0	-5.46	300.1	0	-300.1	0.0042	0.08445
MSMEG_2042c	-	phosphotransferase enzyme family protein	13	40.7	8.2	-2.31	529.6	106.95	-422.7	0.0042	0.08445
MSMEG_6847c	-	hypothetical protein MSMEG_6847	16	55.2	6.7	-3.05	882.7	106.95	-775.8	0.0042	0.08445
MSMEG_0426	-	transcriptional regulator, GntR family protein	18	87.3	3	-4.88	1571.2	53.47	-1517.7	0.0043	0.08595
MSMEG_4245c	-	hypothetical protein MSMEG_4245	8	117	10	-3.54	935.7	80.21	-855.5	0.0043	0.08595
MSMEG_1296	-	uricase	12	29.4	0	-4.93	353.1	0	-353.1	0.0044	0.08743
MSMEG_3682	-	hypothetical protein MSMEG_3682	7	148.8	19.1	-2.96	1041.6	133.68	-907.9	0.0044	0.08743
MSMEG_0064	-	PPE family protein	6	223.6	4.5	-5.65	1341.7	26.74	-1315	0.0045	0.08837
MSMEG_2851c	-	hypothetical protein MSMEG_2851	13	44.8	2.1	-4.45	582.6	26.74	-555.8	0.0045	0.08837
MSMEG_4391	-	acyl-CoA dehydrogenase-family protein	14	36.6	0	-5.23	512	0	-512	0.0045	0.08837
MSMEG_6872	-	beta-lactamase	10	105.9	2.7	-5.31	1059.2	26.74	-1032.5	0.0045	0.08837
MSMEG_1291c	-	putative oxidoreductase	25	68.5	15	-2.19	1712.4	374.31	-1338.1	0.0046	0.08929
MSMEG_2854	-	hypothetical protein MSMEG_2854	11	67.4	4.9	-3.79	741.5	53.47	-688	0.0046	0.08929
MSMEG_3272	-	ribose 5-phosphate isomerase	8	37.5	3.3	-3.49	300.1	26.74	-273.4	0.0046	0.08929
MSMEG_5859c	-	aldehyde dehydrogenase (NAD) family protein	9	27.5	0	-4.83	247.2	0	-247.2	0.0046	0.08929
MSMEG_0266	-	arginine decarboxylase	15	40	1.8	-4.49	600.2	26.74	-573.5	0.0047	0.09044
MSMEG_2037	-	hypothetical protein MSMEG_2037	11	96.3	4.9	-4.31	1059.2	53.47	-1005.8	0.0047	0.09044
MSMEG_4686	-	putative oxidoreductase YdbC	8	110.3	6.7	-4.05	882.7	53.47	-829.2	0.0047	0.09044
MSMEG_2073c	-	CAIB/BAIF family protein	11	41.7	0	-5.42	459	0	-459	0.0048	0.09132
MSMEG_6179	-	acetyl-coenzyme A synthetase	29	378.6	143.8	-1.4	10980.8	4170.89	-6809.9	0.0048	0.09132
MSMEG_6235	-	thiopurine S-methyltransferase (tpmt) superfamily protein	9	125.5	3	-5.4	1129.9	26.74	-1103.1	0.0048	0.09132
MSMEG_6886c	-	transcriptional regulator	7	194.2	7.6	-4.67	1359.4	53.47	-1305.9	0.0048	0.09132
MSMEG_0096	-	peroxisomal hydratase-dehydrogenase-epimerase	10	384.9	88.2	-2.12	3848.6	882.3	-2966.3	0.0049	0.0927
MSMEG_3313c	-	xylose repressor, putative	10	54.7	0	-5.8	547.3	0	-547.3	0.0049	0.0927
MSMEG_2215c	-	AMP-binding enzyme	15	85.9	8.9	-3.27	1288.7	133.68	-1155.1	0.005	0.0938
MSMEG_2924c	-	permease binding-protein component	8	196.4	20.1	-3.29	1571.2	160.42	-1410.8	0.005	0.0938
MSMEG_4086c	ssuD	nitrilotriacetate monooxygenase component A	11	115.6	7.3	-3.99	1271.1	80.21	-1190.9	0.005	0.0938
MSMEG_4543	-	ABC transporter system integral membrane protein	14	75.7	3.8	-4.31	1059.2	53.47	-1005.8	0.0051	0.09541
MSMEG_0147c	-	C-5 sterol desaturase	19	124.5	26.7	-2.22	2365.6	507.99	-1857.6	0.0052	0.09647
MSMEG_1837c	-	secreted protein	14	119.8	9.5	-3.65	1677.1	133.68	-1543.4	0.0052	0.09647
MSMEG_3528c	-	ErfK/YbiS/YcfS/YnhG family protein	8	77.2	0	-6.29	617.9	0	-617.9	0.0052	0.09647
MSMEG_1982	-	acyl-CoA synthase	18	69.6	4.5	-3.97	1253.4	80.21	-1173.2	0.0053	0.09723
MSMEG_3452	-	TetR family protein transcriptional regulator	6	82.4	4.5	-4.21	494.3	26.74	-467.6	0.0053	0.09723
MSMEG_5002c	-	hypothetical protein MSMEG_5002	11	64.2	4.9	-3.72	706.2	53.47	-652.7	0.0053	0.09723
MSMEG_5842	-	hypothetical protein MSMEG_5842	4	128	0	-7.01	512	0	-512	0.0053	0.09723
MSMEG_0500	-	regulator of polyketide synthase expression, putative	7	174	3.8	-5.51	1218.1	26.74	-1191.4	0.0054	0.09723
MSMEG_1501	-	methyltransferase, putative, family protein	16	87.2	11.7	-2.9	1394.7	187.16	-1207.5	0.0054	0.09723
MSMEG_3018	-	transglutaminase domain-containing protein	18	55.9	10.4	-2.43	1006.3	187.16	-819.1	0.0054	0.09723
MSMEG_5807	-	D-methionine transport ATP-binding protein MetN	6	135.3	8.9	-3.92	812.1	53.47	-758.6	0.0054	0.09723
MSMEG_5940c	-	2-keto-4-pentenoate hydratase	10	164.2	13.4	-3.62	1641.8	133.68	-1508.1	0.0054	0.09723
MSMEG_6042	-	transcriptional regulator, TetR family protein	6	179.5	8.9	-4.33	1076.9	53.47	-1023.4	0.0054	0.09723
MSMEG_6846c	-	putative C4 decarboxylate transport protein	5	137.7	0	-7.12	688.5	0	-688.5	0.0054	0.09723
MSMEG_2228	-	oxidoreductase, short chain dehydrogenase/reductase family protein	4	48.5	0	-5.63	194.2	0	-194.2	0.0055	0.0985
MSMEG_6481c	-	hypothetical protein MSMEG_6481	8	101.5	6.7	-3.92	812.1	53.47	-758.6	0.0055	0.0985
MSMEG_0466	-	hypothetical protein MSMEG_0466	11	335.4	72.9	-2.2	3689.7	802.09	-2887.6	0.0056	0.09976
MSMEG_6586	-	alpha/beta hydrolase, putative	10	53	2.7	-4.31	529.6	26.74	-502.9	0.0056	0.09976
MSMEG_3253c	-	hypothetical protein MSMEG_3253	7	105.9	15.3	-2.79	741.5	106.95	-634.5	0.0057	0.10074
MSMEG_4805c	-	acyl-CoA dehydrogenase	8	117	0	-6.88	935.7	0	-935.7	0.0057	0.10074
MSMEG_5778	-	alcohol dehydrogenase, zinc-binding	9	174.6	23.8	-2.88	1571.2	213.89	-1357.3	0.0057	0.10074
MSMEG_6049c	-	secreted protein	12	116.2	13.4	-3.12	1394.7	160.42	-1234.2	0.0058	0.10224
MSMEG_0646c	-	putative transporter	12	80.9	11.1	-2.86	971	133.68	-837.3	0.006	0.10439
MSMEG_1888c	-	methyltransferase	7	32.8	0	-5.08	229.5	0	-229.5	0.006	0.10439
MSMEG_4209c	-	integral membrane protein	8	41.9	3.3	-3.65	335.4	26.74	-308.7	0.006	0.10439
MSMEG_4289	-	amidohydrolase	17	143.3	39.3	-1.87	2436.3	668.41	-1767.8	0.006	0.10439
MSMEG_5652c	-	alpha/beta hydrolase fold	10	220.7	13.4	-4.05	2206.8	133.68	-2073.1	0.006	0.10439
MSMEG_5117c	-	proline dehydrogenase	16	30.9	0	-5	494.3	0	-494.3	0.0061	0.10559
MSMEG_6439	-	ribonuclease activity regulator protein RraA	6	97.1	0	-6.62	582.6	0	-582.6	0.0061	0.10559
MSMEG_3207	hisB	imidazoleglycerol-phosphate dehydratase	8	57.4	3.3	-4.1	459	26.74	-432.3	0.0062	0.10649
MSMEG_3397c	-	acetylornithine deacetylase	15	70.6	0	-6.16	1059.2	0	-1059.2	0.0062	0.10649
MSMEG_4254	-	AMP-binding enzyme	13	182	30.8	-2.56	2365.6	401.05	-1964.6	0.0062	0.10649
MSMEG_0728c	-	hypothetical protein MSMEG_0728	5	88.3	0	-6.48	441.4	0	-441.4	0.0063	0.10739
MSMEG_3275	-	RNA polymerase sigma factor, sigma-70 family protein	5	105.9	0	-6.74	529.6	0	-529.6	0.0063	0.10739
MSMEG_6138	-	metallopeptidase	19	64.1	8.4	-2.92	1218.1	160.42	-1057.7	0.0063	0.10739
MSMEG_0527	-	2-hydroxycyclohexnecarboxyl-CoA dehydrogenase	5	70.6	0	-6.16	353.1	0	-353.1	0.0064	0.108
MSMEG_4536c	-	hypothetical protein MSMEG_4536	16	80.5	8.4	-3.27	1288.7	133.68	-1155.1	0.0064	0.108
MSMEG_5601	-	hypothetical protein MSMEG_5601	14	16.4	0	-4.12	229.5	0	-229.5	0.0064	0.108
MSMEG_5746c	-	gas vesicle protein	9	76.5	8.9	-3.1	688.5	80.21	-608.3	0.0064	0.108
MSMEG_4620	-	NAD-dependent deacetylase 1	8	88.3	0	-6.48	706.2	0	-706.2	0.0065	0.10913
MSMEG_6428	-	hypothetical protein MSMEG_6428	4	44.1	0	-5.5	176.5	0	-176.5	0.0065	0.10913
MSMEG_0106	-	sensory histidine kinase	11	46.5	2.4	-4.26	512	26.74	-485.2	0.0066	0.10999
MSMEG_2213	-	O-methyltransferase	15	62.4	8.9	-2.81	935.7	133.68	-802	0.0066	0.10999
MSMEG_4874c	-	putative acyl-CoA dehydrogenase	10	70.6	0	-6.16	706.2	0	-706.2	0.0066	0.10999
MSMEG_0429c	-	putative ferric uptake regulator	5	109.5	10.7	-3.36	547.3	53.47	-493.8	0.0067	0.11029
MSMEG_0992	-	2-nitropropane dioxygenase, NPD	8	79.4	0	-6.33	635.5	0	-635.5	0.0067	0.11029
MSMEG_3134	-	cytochrome P450 107B1	15	22.4	0	-4.55	335.4	0	-335.4	0.0067	0.11029
MSMEG_5595c	-	MarR-family protein transcriptional regulator	5	81.2	16	-2.34	406	80.21	-325.8	0.0067	0.11029
MSMEG_5895c	-	virulence factor mce family protein	17	128.8	31.5	-2.03	2189.1	534.73	-1654.4	0.0067	0.11029
MSMEG_1090	-	amidase	19	33.4	2.8	-3.57	635.5	53.47	-582.1	0.0068	0.11112
MSMEG_5565c	-	hypothetical protein MSMEG_5565	7	65.6	11.5	-2.52	459	80.21	-378.8	0.0068	0.11112
MSMEG_6936c	-	hypothetical protein MSMEG_6936	6	173.6	13.4	-3.7	1041.6	80.21	-961.4	0.0068	0.11112
MSMEG_1918	-	sensor histidine kinase	5	120	0	-6.92	600.2	0	-600.2	0.0069	0.11193
MSMEG_5269	-	hypothetical protein MSMEG_5269	12	32.4	0	-5.06	388.4	0	-388.4	0.0069	0.11193
MSMEG_6238c	-	putative two-component system sensor kinase	9	54.9	3	-4.21	494.3	26.74	-467.6	0.0069	0.11193
MSMEG_1359	-	DeoR-family protein transcriptional regulator	14	82	5.7	-3.84	1147.5	80.21	-1067.3	0.007	0.1122
MSMEG_1876	-	lipoprotein LpqB	14	83.2	9.5	-3.12	1165.2	133.68	-1031.5	0.007	0.1122
MSMEG_2407c	-	morphine 6-dehydrogenase	11	322.6	68.1	-2.24	3548.5	748.62	-2799.8	0.007	0.1122
MSMEG_2911	-	integral membrane transport protein	19	60.4	14.1	-2.1	1147.5	267.36	-880.1	0.007	0.1122
MSMEG_4171c	-	ribose transport system permease protein RbsC	10	45.9	0	-5.55	459	0	-459	0.007	0.1122
MSMEG_0463	-	MmpL4 protein	33	161.6	60	-1.43	5331.5	1978.5	-3353	0.0071	0.11246
MSMEG_0863c	-	short chain dehydrogenase	10	56.5	2.7	-4.4	564.9	26.74	-538.2	0.0071	0.11246
MSMEG_1579	rimI	ribosomal-protein-alanine acetyltransferase	10	77.7	5.3	-3.86	776.8	53.47	-723.3	0.0071	0.11246
MSMEG_2217c	-	AMP-dependent synthetase and ligase	5	38.8	0	-5.32	194.2	0	-194.2	0.0071	0.11246
MSMEG_2280	-	pyruvate dehydrogenase	16	98.2	23.4	-2.07	1571.2	374.31	-1196.9	0.0071	0.11246
MSMEG_5743c	-	patatin	5	70.6	0	-6.16	353.1	0	-353.1	0.0073	0.11536
MSMEG_4782	-	hypothetical protein MSMEG_4782	5	63.6	5.3	-3.57	317.8	26.74	-291	0.0074	0.11666
MSMEG_0410	-	MmpL protein	25	270.5	81.3	-1.73	6761.5	2031.97	-4729.5	0.0076	0.1187
MSMEG_0695	-	isoniazid inductible protein IniA	11	59.4	2.4	-4.61	653.2	26.74	-626.5	0.0076	0.1187
MSMEG_2784c	msrB	methionine-R-sulfoxide reductase	5	98.9	5.3	-4.21	494.3	26.74	-467.6	0.0076	0.1187
MSMEG_3708	-	catalase	13	38	2.1	-4.21	494.3	26.74	-467.6	0.0076	0.1187
MSMEG_5929c	-	hypothetical protein MSMEG_5929	16	193.1	43.4	-2.15	3089.5	695.15	-2394.3	0.0077	0.11971
MSMEG_6506	-	nicotinamidase/pyrazinamidase	5	116.5	0	-6.88	582.6	0	-582.6	0.0077	0.11971
MSMEG_0513	-	integral membrane protein	10	72.4	5.3	-3.76	723.8	53.47	-670.3	0.0078	0.1207
MSMEG_4519	-	NrtC protein	5	35.3	0	-5.18	176.5	0	-176.5	0.0078	0.1207
MSMEG_1110	-	transmembrane protein	5	70.6	0	-6.16	353.1	0	-353.1	0.0079	0.12113
MSMEG_2847c	-	extracellular solute-binding protein, family protein 5	14	56.7	3.8	-3.89	794.4	53.47	-741	0.0079	0.12113
MSMEG_3923	-	hypothetical protein MSMEG_3923	5	53	0	-5.75	264.8	0	-264.8	0.0079	0.12113
MSMEG_5025c	-	putative transcriptional regulator	9	39.2	0	-5.33	353.1	0	-353.1	0.0079	0.12113
MSMEG_0267	-	esterase	12	85.3	8.9	-3.26	1023.9	106.95	-917	0.008	0.12128
MSMEG_1535c	-	hypothetical protein MSMEG_1535	12	48.5	0	-5.63	582.6	0	-582.6	0.008	0.12128
MSMEG_4398	-	hypothetical protein MSMEG_4398	9	102	3	-5.1	918	26.74	-891.3	0.008	0.12128
MSMEG_5945	-	hypothetical protein MSMEG_5945	11	88.3	2.4	-5.18	971	26.74	-944.2	0.008	0.12128
MSMEG_6568	-	regulatory protein, LuxR, putative	9	131.4	0	-7.05	1182.8	0	-1182.8	0.008	0.12128
MSMEG_0346	-	virulence factor	14	82	5.7	-3.84	1147.5	80.21	-1067.3	0.0081	0.1217
MSMEG_1168	-	putative transcriptional regulator	5	144.8	10.7	-3.76	723.8	53.47	-670.3	0.0081	0.1217
MSMEG_2752c	-	RNA polymerase sigma factor SigB	9	237.3	59.4	-2	2136.1	534.73	-1601.4	0.0081	0.1217
MSMEG_4166c	-	acyl-CoA dehydrogenase	15	36.5	1.8	-4.36	547.3	26.74	-520.5	0.0081	0.1217
MSMEG_0383c	-	hypothetical protein MSMEG_0383	5	173	10.7	-4.02	865	53.47	-811.6	0.0082	0.12293
MSMEG_1895c	-	HTH-type transcriptional regulator AlsR	7	229.5	11.5	-4.32	1606.5	80.21	-1526.3	0.0083	0.12387
MSMEG_4881c	-	methylmalonyl-CoA mutase, N-terminus of large subunit	26	99.8	26.7	-1.9	2595.1	695.15	-1900	0.0083	0.12387
MSMEG_4259	-	hypothetical protein MSMEG_4259	13	248.5	18.5	-3.75	3230.7	240.63	-2990.1	0.0084	0.12509
MSMEG_5967c	-	glucose-methanol-choline oxidoreductase	32	132.4	40.1	-1.72	4237	1283.35	-2953.6	0.0085	0.1263
MSMEG_1533c	-	subtilase family protein	9	33.3	0	-5.1	300.1	0	-300.1	0.0086	0.1275
MSMEG_4422	-	oxidoreductase	11	41.7	0	-5.42	459	0	-459	0.0087	0.1287
MSMEG_2175c	-	nitrilotriacetate monooxygenase component A	9	47.1	0	-5.59	423.7	0	-423.7	0.0088	0.12961
MSMEG_4305c	-	bifunctional RNase H/acid phosphatase	11	70.6	4.9	-3.86	776.8	53.47	-723.3	0.0088	0.12961
MSMEG_4644c	-	molybdopterin-guanine dinucleotide biosynthesis protein A	7	295.1	76.4	-1.95	2065.5	534.73	-1530.8	0.0089	0.13051
MSMEG_5909	-	oxidoreductase	7	78.2	3.8	-4.36	547.3	26.74	-520.5	0.0089	0.13051
MSMEG_2358	mnmA	tRNA (5-methylaminomethyl-2-thiouridylate)-methyltransferase	9	66.7	5.9	-3.49	600.2	53.47	-546.8	0.009	0.13169
MSMEG_0714c	-	acyl-CoA dehydrogenase	13	118.1	16.5	-2.84	1535.9	213.89	-1322	0.0091	0.13257
MSMEG_5987c	-	two-component regulator	16	101.5	13.4	-2.92	1624.2	213.89	-1410.3	0.0091	0.13257
MSMEG_0632c	-	hypothetical protein MSMEG_0632	7	247.2	22.9	-3.43	1730.1	160.42	-1569.7	0.0092	0.13345
MSMEG_5458c	-	cyclic nucleotide-binding protein	9	155	3	-5.7	1394.7	26.74	-1367.9	0.0092	0.13345
MSMEG_1241	-	hypothetical protein MSMEG_1241	30	50	5.3	-3.23	1500.6	160.42	-1340.2	0.0093	0.13461
MSMEG_3297	-	transcriptional regulator, CadC	11	32.1	2.4	-3.72	353.1	26.74	-326.3	0.0094	0.13576
MSMEG_1049	-	methyltransferase, UbiE/COQ5 family protein	9	123.6	17.8	-2.79	1112.2	160.42	-951.8	0.0095	0.13633
MSMEG_1288	-	hypothetical protein MSMEG_1288	10	81.2	2.7	-4.92	812.1	26.74	-785.3	0.0095	0.13633
MSMEG_6702	-	[NADP+] succinate-semialdehyde dehydrogenase [Mycobacterium smegmatis str. MC2 155]	10	49.4	2.7	-4.21	494.3	26.74	-467.6	0.0095	0.13633
MSMEG_5456	-	MK35 lipoprotein	11	128.4	12.2	-3.4	1412.3	133.68	-1278.6	0.0096	0.13747
MSMEG_2128	-	malonyl CoA decarboxylase	9	27.5	0	-4.83	247.2	0	-247.2	0.0097	0.13861
MSMEG_0563	-	hypothetical protein MSMEG_0563	9	180.5	26.7	-2.75	1624.2	240.63	-1383.5	0.0098	0.13915
MSMEG_0788c	-	hypothetical protein MSMEG_0788	12	183.9	33.4	-2.46	2206.8	401.05	-1805.7	0.0098	0.13915
MSMEG_0913	-	methoxy mycolic acid synthase 1	16	229.5	66.8	-1.78	3672	1069.46	-2602.6	0.0098	0.13915
MSMEG_1476	sppA	signal peptide peptidase SppA, 67K type	14	89.5	7.6	-3.55	1253.4	106.95	-1146.5	0.0099	0.14027
MSMEG_0184	-	transferase	16	35.3	3.3	-3.4	564.9	53.47	-511.5	0.01	0.14139
MSMEG_0033c	-	protein phosphatase 2C	10	63.6	0	-6.01	635.5	0	-635.5	0.0102	0.14361
MSMEG_5520	-	hypothetical protein MSMEG_5520	9	68.7	5.9	-3.53	617.9	53.47	-564.4	0.0102	0.14361
MSMEG_4611	-	carrier protein	8	121.4	3.3	-5.18	971	26.74	-944.2	0.0103	0.14472
MSMEG_1852	selD	selenide, water dikinase	10	98.9	5.3	-4.21	988.6	53.47	-935.2	0.0104	0.14582
MSMEG_2971c	-	regulatory protein	8	72.8	3.3	-4.45	582.6	26.74	-555.8	0.0105	0.14691
MSMEG_4732	-	glycosyl transferase, group 2 family protein, putative	10	42.4	2.7	-3.99	423.7	26.74	-397	0.0106	0.148
MSMEG_6133c	-	5-dehydro-4-deoxyglucarate dehydratase	11	32.1	0	-5.05	353.1	0	-353.1	0.0107	0.14909
MSMEG_5168	-	hypothetical protein MSMEG_5168	16	199.7	25.1	-2.99	3195.4	401.05	-2794.3	0.0108	0.15017
MSMEG_0345	-	hypothetical protein MSMEG_0345	15	176.5	55.3	-1.68	2648.1	828.83	-1819.3	0.0109	0.15125
MSMEG_3210	-	inositol monophosphate phosphatase	7	194.2	11.5	-4.08	1359.4	80.21	-1279.2	0.0111	0.15371
MSMEG_2919c	-	2-dehydropantoate 2-reductase	7	83.2	7.6	-3.45	582.6	53.47	-529.1	0.0112	0.15445
MSMEG_5032c	-	putative transcriptional regulator	6	61.8	0	-5.97	370.7	0	-370.7	0.0112	0.15445
MSMEG_1561c	-	LysR-family protein trancsriptional regulator	8	79.4	3.3	-4.57	635.5	26.74	-608.8	0.0113	0.15551
MSMEG_0657c	-	Rieske (2Fe-2S) domain-containing protein	18	86.3	17.8	-2.28	1553.6	320.84	-1232.7	0.0115	0.15666
MSMEG_0787c	-	extracellular solute-binding protein, family protein 3	7	181.6	3.8	-5.57	1271.1	26.74	-1244.4	0.0115	0.15666
MSMEG_1905c	-	acyl-CoA dehydrogenase protein	10	100.6	8	-3.65	1006.3	80.21	-926.1	0.0115	0.15666
MSMEG_3086	tpiA	triosephosphate isomerase	7	156.4	19.1	-3.03	1094.5	133.68	-960.9	0.0115	0.15666
MSMEG_4142c	-	transcriptional repressor, TetR family protein, putative	7	85.7	3.8	-4.49	600.2	26.74	-573.5	0.0115	0.15666
MSMEG_0716	-	major facilitator superfamily protein	22	77	14.6	-2.4	1694.8	320.84	-1373.9	0.0116	0.15707
MSMEG_1086	-	ABC transporter permease protein	10	58.3	0	-5.89	582.6	0	-582.6	0.0116	0.15707
MSMEG_6487c	-	2-hydroxy-3-carboxy-6-oxo-7-methylocta-2, 4-dienoate decarboxylase	9	72.6	5.9	-3.61	653.2	53.47	-599.7	0.0116	0.15707
MSMEG_0048	-	pyridoxamine 5'-phosphate oxidase family protein	10	137.7	24.1	-2.52	1377	240.63	-1136.4	0.0117	0.15747
MSMEG_4085c	-	nitrilotriacetate monooxygenase component A	15	62.4	0	-5.99	935.7	0	-935.7	0.0117	0.15747
MSMEG_6533c	-	hypothetical protein MSMEG_6533	11	30.5	0	-4.98	335.4	0	-335.4	0.0117	0.15747
MSMEG_0126c	-	mandelate racemase/muconate lactonizing enzyme	10	102.4	13.4	-2.94	1023.9	133.68	-890.3	0.0118	0.15787
MSMEG_2090	-	putative cell division protein FtsX	17	180.7	37.7	-2.26	3071.8	641.68	-2430.1	0.0118	0.15787
MSMEG_5422c	-	nucleoside triphosphate pyrophosphohydrolase	6	111.8	0	-6.82	670.9	0	-670.9	0.0118	0.15787
MSMEG_1768	-	hypothetical protein MSMEG_1768	7	153.8	7.6	-4.33	1076.9	53.47	-1023.4	0.0119	0.15795
MSMEG_2035c	-	amine oxidase	13	51.6	2.1	-4.65	670.9	26.74	-644.1	0.0119	0.15795
MSMEG_3554	-	N5,N10-methylene- tetrahydromethanopterin reductase	14	59.3	9.5	-2.63	829.7	133.68	-696.1	0.0119	0.15795
MSMEG_3900c	ectB	diaminobutyrate--2-oxoglutarate aminotransferase	12	97.1	6.7	-3.86	1165.2	80.21	-1085	0.0119	0.15795
MSMEG_4317	-	hypothetical protein MSMEG_4317	12	23.5	0	-4.62	282.5	0	-282.5	0.0123	0.16261
MSMEG_4842	-	amidohydrolase	12	26.5	0	-4.78	317.8	0	-317.8	0.0123	0.16261
MSMEG_1771	-	methylase, putative	6	123.6	0	-6.96	741.5	0	-741.5	0.0124	0.16361
MSMEG_1927	-	cobyrinic acid a,c-diamide synthase	8	128	23.4	-2.45	1023.9	187.16	-836.8	0.0125	0.16396
MSMEG_4405c	-	putative ECF sigma factor RpoE1	11	80.2	2.4	-5.05	882.7	26.74	-856	0.0125	0.16396
MSMEG_6629c	mdcH	malonate decarboxylase, epsilon subunit	7	95.8	3.8	-4.65	670.9	26.74	-644.1	0.0125	0.16396
MSMEG_4079c	-	putative hydrolase	7	88.3	7.6	-3.53	617.9	53.47	-564.4	0.0126	0.16495
MSMEG_2329	-	methyltransferase, UbiE/COQ5 family protein	9	145.2	32.7	-2.15	1306.4	294.1	-1012.3	0.0127	0.16594
MSMEG_3545c	-	hypothetical protein MSMEG_3545	6	73.6	0	-6.22	441.4	0	-441.4	0.0128	0.16597
MSMEG_5287	-	dehydrogenase	8	53	3.3	-3.99	423.7	26.74	-397	0.0128	0.16597
MSMEG_6509	-	ABC-type drug export system, ATP-binding protein	9	255	23.8	-3.42	2295	213.89	-2081.1	0.0128	0.16597
MSMEG_0226c	-	MmpS5 protein	4	225.1	13.4	-4.07	900.4	53.47	-846.9	0.0129	0.16597
MSMEG_2124c	-	glycerol uptake facilitator, MIP channel	8	72.8	10	-2.86	582.6	80.21	-502.4	0.0129	0.16597
MSMEG_4129	-	hypothetical protein MSMEG_4129	9	68.7	8.9	-2.95	617.9	80.21	-537.7	0.0129	0.16597
MSMEG_4255c	-	hypothetical protein MSMEG_4255	9	137.3	26.7	-2.36	1235.8	240.63	-995.2	0.0129	0.16597
MSMEG_6305	-	hypothetical protein MSMEG_6305	7	199.2	30.6	-2.7	1394.7	213.89	-1180.8	0.0129	0.16597
MSMEG_6801c	-	kinase, pfkB family protein	6	76.5	0	-6.28	459	0	-459	0.0131	0.16822
MSMEG_3395	-	short chain dehydrogenase	11	61	2.4	-4.65	670.9	26.74	-644.1	0.0132	0.16885
MSMEG_2767c	-	hypothetical protein MSMEG_2767	8	178.7	26.7	-2.74	1430	213.89	-1216.1	0.0133	0.16885
MSMEG_3121	-	DNA-binding protein	7	58	0	-5.88	406	0	-406	0.0133	0.16885
MSMEG_3897c	-	proteasome component	18	283.4	96.5	-1.55	5102	1737.87	-3364.1	0.0133	0.16885
MSMEG_4635	-	ammonium transporter family protein	16	121.4	25.1	-2.28	1941.9	401.05	-1540.9	0.0133	0.16885
MSMEG_5867	-	steroid delta-isomerase	5	84.7	5.3	-3.99	423.7	26.74	-397	0.0133	0.16885
MSMEG_1874	mtrA	DNA-binding response regulator MtrA	4	57.4	0	-5.87	229.5	0	-229.5	0.0134	0.16948
MSMEG_4958c	lysA	diaminopimelate decarboxylase	12	44.1	0	-5.5	529.6	0	-529.6	0.0134	0.16948
MSMEG_2238	-	aldehyde dehydrogenase (NAD) family protein	16	92.7	8.4	-3.47	1482.9	133.68	-1349.3	0.0135	0.17011
MSMEG_6197c	-	diaminopimelate decarboxylase	12	135.3	8.9	-3.92	1624.2	106.95	-1517.2	0.0135	0.17011
MSMEG_4235c	mraW	S-adenosyl-methyltransferase MraW	12	67.7	11.1	-2.6	812.1	133.68	-678.4	0.0136	0.17072
MSMEG_5284	-	patatin	9	105.9	8.9	-3.57	953.3	80.21	-873.1	0.0136	0.17072
MSMEG_1860c	-	hypothetical protein MSMEG_1860	4	57.4	13.4	-2.1	229.5	53.47	-176	0.0138	0.17227
MSMEG_3608c	-	acetyl-CoA acetyltransferase	15	60	3.6	-4.07	900.4	53.47	-846.9	0.0138	0.17227
MSMEG_5779c	pstB	phosphate ABC transporter, ATP-binding protein	6	82.4	13.4	-2.62	494.3	80.21	-414.1	0.0138	0.17227
MSMEG_2929	-	thioesterase family protein	6	73.6	0	-6.22	441.4	0	-441.4	0.0139	0.17256
MSMEG_3290	-	regulatory protein	20	50.3	10.7	-2.23	1006.3	213.89	-792.4	0.0139	0.17256
MSMEG_3830	-	3-oxoacyl-	6	64.7	0	-6.04	388.4	0	-388.4	0.0139	0.17256
MSMEG_0924c	-	hydrolase, carbon-nitrogen family protein	7	191.7	11.5	-4.06	1341.7	80.21	-1261.5	0.014	0.1728
MSMEG_1117	-	transcriptional regulator	6	29.4	0	-4.93	176.5	0	-176.5	0.014	0.1728
MSMEG_2123c	dhaK	dihydroxyacetone kinase, DhaK subunit	7	83.2	7.6	-3.45	582.6	53.47	-529.1	0.014	0.1728
MSMEG_0591	rhaB	rhamnulokinase	14	94.6	17.2	-2.46	1324.1	240.63	-1083.4	0.0141	0.1728
MSMEG_1920c	-	diacylglycerol kinase, catalytic region	6	229.5	17.8	-3.69	1377	106.95	-1270.1	0.0141	0.1728
MSMEG_3924c	-	peptide synthetase ScpsB, putative	15	38.8	7.1	-2.45	582.6	106.95	-475.6	0.0141	0.1728
MSMEG_4846c	-	enoyl-CoA hydratase	6	100	0	-6.66	600.2	0	-600.2	0.0141	0.1728
MSMEG_1480c	-	methyltransferase	10	65.3	8	-3.03	653.2	80.21	-573	0.0142	0.17367
MSMEG_4421	-	hypothetical protein MSMEG_4421	6	64.7	0	-6.04	388.4	0	-388.4	0.0143	0.17367
MSMEG_4460	-	acetolactate synthase	12	64.7	0	-6.04	776.8	0	-776.8	0.0143	0.17367
MSMEG_4738	-	hypothetical protein MSMEG_4738	10	155.4	8	-4.28	1553.6	80.21	-1473.3	0.0143	0.17367
MSMEG_5860	-	transcriptional regulator, TetR family protein	7	204.3	15.3	-3.74	1430	106.95	-1323	0.0143	0.17367
MSMEG_4156	-	putative transposase	29	63.3	16.6	-1.93	1836	481.26	-1354.8	0.0144	0.17425
MSMEG_5074	-	transcriptional regulatory protein	9	174.6	29.7	-2.55	1571.2	267.36	-1303.8	0.0144	0.17425
MSMEG_3070c	-	LprG protein	5	293.1	42.8	-2.78	1465.3	213.89	-1251.4	0.0145	0.17452
MSMEG_6430c	-	hypothetical protein MSMEG_6430	17	185.9	48.8	-1.93	3160.1	828.83	-2331.2	0.0145	0.17452
MSMEG_6885	-	MmcI protein	12	44.1	4.5	-3.31	529.6	53.47	-476.1	0.0145	0.17452
MSMEG_0562c	-	hypothetical protein MSMEG_0562	5	409.6	37.4	-3.45	2047.9	187.16	-1860.7	0.0147	0.17598
MSMEG_4812	-	respiratory-chain NADH dehydrogenase domain-containing protein	13	48.9	2.1	-4.57	635.5	26.74	-608.8	0.0147	0.17598
MSMEG_6555c	-	transcriptional regulator, TetR family protein, putative	8	61.8	0	-5.97	494.3	0	-494.3	0.0147	0.17598
MSMEG_1776c	-	ribonuclease Z	13	48.9	4.1	-3.57	635.5	53.47	-582.1	0.0149	0.17743
MSMEG_4854c	-	peptidase, M24 family protein	10	53	5.3	-3.31	529.6	53.47	-476.1	0.0149	0.17743
MSMEG_5054c	-	ABC transporter, quaternary amine uptake transporter (QAT) family protein, substrate-binding protein	6	85.3	4.5	-4.26	512	26.74	-485.2	0.0149	0.17743
MSMEG_6318c	-	putative diol dehydratase reactivation protein	12	63.3	0	-6.01	759.1	0	-759.1	0.015	0.1783
MSMEG_2399	ung	uracil-DNA glycosylase	4	53	0	-5.75	211.8	0	-211.8	0.0151	0.17886
MSMEG_5003	-	O-methyltransferase, family protein 3	6	135.3	4.5	-4.92	812.1	26.74	-785.3	0.0151	0.17886
MSMEG_1896	-	acetyl-CoA acetyltransferase	6	38.3	0	-5.29	229.5	0	-229.5	0.0152	0.17972
MSMEG_0380	-	MmpS4 protein	6	64.7	4.5	-3.86	388.4	26.74	-361.7	0.0153	0.17996
MSMEG_5062c	-	hypothetical protein MSMEG_5062	5	120	16	-2.9	600.2	80.21	-520	0.0153	0.17996
MSMEG_5295c	-	acyl-CoA synthetase	8	132.4	36.8	-1.85	1059.2	294.1	-765.1	0.0153	0.17996
MSMEG_3893	-	hypothetical protein MSMEG_3893	7	158.9	7.6	-4.38	1112.2	53.47	-1058.7	0.0154	0.18082
MSMEG_5551	-	stas domain-containing protein	8	154.5	6.7	-4.53	1235.8	53.47	-1182.3	0.0155	0.18167
MSMEG_4898	-	hypothetical protein MSMEG_4898	9	60.8	3	-4.36	547.3	26.74	-520.5	0.0156	0.18253
MSMEG_3754c	-	TPR repeat-containing protein	7	171.5	7.6	-4.49	1200.5	53.47	-1147	0.0157	0.18295
MSMEG_5633	-	feruloyl-CoA synthetase	20	121.8	29.4	-2.05	2436.3	588.2	-1848.1	0.0157	0.18295
MSMEG_2027c	-	hypothetical protein MSMEG_2027	7	131.1	7.6	-4.1	918	53.47	-864.5	0.0158	0.18295
MSMEG_2483	-	transcriptional regulator, IclR family protein	8	68.4	3.3	-4.36	547.3	26.74	-520.5	0.0158	0.18295
MSMEG_3524	-	linalool 8-monooxygenase	11	38.5	0	-5.3	423.7	0	-423.7	0.0158	0.18295
MSMEG_6931	-	RNA polymerase sigma-70 factor	6	100	0	-6.66	600.2	0	-600.2	0.0158	0.18295
MSMEG_1479c	-	methyltransferase, putative, family protein	9	54.9	3	-4.21	494.3	26.74	-467.6	0.0159	0.18379
MSMEG_0286c	-	GntR-family protein transcriptional regulator	6	61.8	0	-5.97	370.7	0	-370.7	0.016	0.18463
MSMEG_0510	-	D-tagatose-bisphosphate aldolase, class II, non-catalytic subunit	22	101.1	35.2	-1.52	2224.4	775.36	-1449	0.0162	0.18542
MSMEG_0897	-	hypothetical protein MSMEG_0897	13	78.8	10.3	-2.94	1023.9	133.68	-890.3	0.0162	0.18542
MSMEG_5776	phoU	phosphate transport system regulatory protein PhoU	7	116	3.8	-4.92	812.1	26.74	-785.3	0.0162	0.18542
MSMEG_6445c	-	hypothetical protein MSMEG_6445	6	114.8	0	-6.85	688.5	0	-688.5	0.0162	0.18542
MSMEG_2080c	-	putative acyl-CoA dehydrogenase	7	80.7	7.6	-3.4	564.9	53.47	-511.5	0.0163	0.18542
MSMEG_5814	pcaC	hypothetical protein MSMEG_5814	11	38.5	4.9	-2.99	423.7	53.47	-370.2	0.0163	0.18542
MSMEG_6717	-	oxidoreductase, Gfo/Idh/MocA family protein	13	16.3	0	-4.11	211.8	0	-211.8	0.0163	0.18542
MSMEG_6766c	-	ABC transporter, ATP-binding protein, NodI family protein	6	76.5	4.5	-4.1	459	26.74	-432.3	0.0163	0.18542
MSMEG_0243	-	hypothetical protein MSMEG_0243	4	136.8	6.7	-4.36	547.3	26.74	-520.5	0.0164	0.18542
MSMEG_0548	-	chromosome replication initiation inhibitor protein	6	155.9	8.9	-4.13	935.7	53.47	-882.2	0.0164	0.18542
MSMEG_0941	-	AP endonuclease, family protein 2	8	244.9	40.1	-2.61	1959.6	320.84	-1638.8	0.0164	0.18542
MSMEG_4354	-	dipeptide-binding protein of ABC transport system	19	160.7	42.2	-1.93	3054.1	802.09	-2252.1	0.0164	0.18542
MSMEG_4710c	-	branched-chain alpha-keto acid dehydrogenase subunit E2	6	47.1	0	-5.59	282.5	0	-282.5	0.0165	0.18593
MSMEG_4737c	-	hypothetical protein MSMEG_4737	8	46.3	3.3	-3.79	370.7	26.74	-344	0.0165	0.18593
MSMEG_4039	-	aryl-alcohol dehydrogenase	7	63.1	3.8	-4.05	441.4	26.74	-414.6	0.0166	0.18674
MSMEG_4832c	-	acyl-CoA dehydrogenase	18	91.2	23.8	-1.94	1641.8	427.78	-1214	0.0167	0.18693
MSMEG_6222	-	integral membrane protein	11	72.2	2.4	-4.89	794.4	26.74	-767.7	0.0167	0.18693
MSMEG_6763c	-	oxidoreductase	6	129.5	0	-7.03	776.8	0	-776.8	0.0167	0.18693
MSMEG_2601	pcaH	protocatechuate 3,4-dioxygenase, beta subunit	10	63.6	2.7	-4.57	635.5	26.74	-608.8	0.0168	0.18742
MSMEG_5006	-	phosphohistidine phosphatase	4	114.8	13.4	-3.1	459	53.47	-405.5	0.0168	0.18742
MSMEG_4578c	-	hypothetical protein MSMEG_4578	8	48.5	3.3	-3.86	388.4	26.74	-361.7	0.0169	0.18791
MSMEG_5077	-	integral membrane protein	8	172.1	6.7	-4.69	1377	53.47	-1323.5	0.0169	0.18791
MSMEG_6532	-	transcriptional regulatory protein	4	97.1	0	-6.62	388.4	0	-388.4	0.017	0.18871
MSMEG_2049	-	putative transcriptional regulator, TetR family protein	10	56.5	5.3	-3.4	564.9	53.47	-511.5	0.0171	0.18951
MSMEG_2630	-	DHH family protein	7	37.8	3.8	-3.31	264.8	26.74	-238.1	0.0172	0.19031
MSMEG_2561c	-	gluconolactonase	5	98.9	5.3	-4.21	494.3	26.74	-467.6	0.0173	0.1911
MSMEG_4692c	-	hypothetical protein MSMEG_4692	5	155.4	16	-3.28	776.8	80.21	-696.6	0.0174	0.19189
MSMEG_0101	-	hypothetical protein MSMEG_0101	4	123.6	6.7	-4.21	494.3	26.74	-467.6	0.0176	0.19346
MSMEG_2531c	-	GntR family protein transcriptional regulator	10	135.9	26.7	-2.35	1359.4	267.36	-1092	0.0176	0.19346
MSMEG_2683	thyX	FAD-dependent thymidylate synthase	8	64	3.3	-4.26	512	26.74	-485.2	0.0177	0.19392
MSMEG_4781	-	hypothetical protein MSMEG_4781	10	68.9	5.3	-3.69	688.5	53.47	-635	0.0177	0.19392
MSMEG_2211c	-	DNA-binding protein	10	180.1	40.1	-2.17	1800.7	401.05	-1399.7	0.0178	0.19407
MSMEG_2876c	-	oxidoreductase, short chain dehydrogenase/reductase family protein	8	53	3.3	-3.99	423.7	26.74	-397	0.0178	0.19407
MSMEG_5177c	-	regulatory protein, TetR	7	98.4	30.6	-1.69	688.5	213.89	-474.6	0.0178	0.19407
MSMEG_2075c	hmgA	homogentisate 1,2-dioxygenase	14	138.7	34.4	-2.01	1941.9	481.26	-1460.7	0.0179	0.19452
MSMEG_3356	-	hypothetical protein MSMEG_3356	9	86.3	11.9	-2.86	776.8	106.95	-669.8	0.0179	0.19452
MSMEG_5499c	-	hypothetical protein MSMEG_5499	6	26.5	0	-4.78	158.9	0	-158.9	0.018	0.19498
MSMEG_5813	-	carveol dehydrogenase	10	63.6	5.3	-3.57	635.5	53.47	-582.1	0.018	0.19498
MSMEG_2516c	-	putative oxidoreductase	8	101.5	6.7	-3.92	812.1	53.47	-758.6	0.0181	0.19543
MSMEG_4780	-	cytochrome p450	10	42.4	5.3	-2.99	423.7	53.47	-370.2	0.0181	0.19543
MSMEG_5785	-	hypothetical protein MSMEG_5785	8	251.6	50.1	-2.33	2012.6	401.05	-1611.5	0.0184	0.19835
MSMEG_3179c	-	pyridoxamine 5'-phosphate oxidase family protein	5	102.4	0	-6.69	512	0	-512	0.0185	0.19911
MSMEG_6482	-	secreted protein	6	194.2	26.7	-2.86	1165.2	160.42	-1004.7	0.0186	0.19987
MSMEG_1316c	prfC	peptide chain release factor 3	12	83.9	13.4	-2.65	1006.3	160.42	-845.9	0.0187	0.20062
MSMEG_1970c	-	sigma factor	18	102	19.3	-2.4	1836	347.57	-1488.4	0.0188	0.20137
MSMEG_0363	-	TetR-family protein regulatory protein	8	72.8	3.3	-4.45	582.6	26.74	-555.8	0.0189	0.20148
MSMEG_2552c	-	aldehyde dehydrogenase (NAD) family protein	16	40.8	3.3	-3.61	653.2	53.47	-599.7	0.0189	0.20148
MSMEG_6889c	-	transposase	4	70.6	0	-6.16	282.5	0	-282.5	0.0189	0.20148
MSMEG_2870	-	oxygenase KshA	16	32	0	-5.04	512	0	-512	0.0192	0.20371
MSMEG_4243	-	serine/threonine-protein kinase PK-1	16	18.8	0	-4.3	300.1	0	-300.1	0.0192	0.20371
MSMEG_4660c	-	hypothetical protein MSMEG_4660	5	45.9	0	-5.55	229.5	0	-229.5	0.0192	0.20371
MSMEG_2100c	-	peptidase family protein M20/M25/M40	14	136.2	24.8	-2.46	1906.6	347.57	-1559.1	0.0193	0.20445
MSMEG_3547	ehuB	ectoine/hydroxyectoine ABC transporter solute-binding protein	7	40.4	0	-5.37	282.5	0	-282.5	0.0194	0.20486
MSMEG_6265	-	transcriptional regulator	5	123.6	16	-2.95	617.9	80.21	-537.7	0.0194	0.20486
MSMEG_6708	-	epoxide hydrolase	13	50.2	6.2	-3.03	653.2	80.21	-573	0.0195	0.20559
MSMEG_0830c	-	acetyltransferase, gnat family protein	8	119.2	13.4	-3.16	953.3	106.95	-846.4	0.0196	0.20568
MSMEG_4334	-	flavoprotein	7	25.2	0	-4.71	176.5	0	-176.5	0.0196	0.20568
MSMEG_4531c	cysW	sulfate ABC transporter, permease protein CysW	6	70.6	4.5	-3.99	423.7	26.74	-397	0.0196	0.20568
MSMEG_0756c	-	peptidase, M50B family protein	7	171.5	553.8	1.69	1200.5	3876.79	2676.3	0.0197	0.20608
MSMEG_6400c	-	transmembrane protein	27	9.2	0	-3.34	247.2	0	-247.2	0.0197	0.20608
MSMEG_5530	-	putative aliphatic sulfonates transport permease protein SsuC	7	55.5	0	-5.82	388.4	0	-388.4	0.0198	0.20649
MSMEG_6628	-	transcriptional regulator, TetR family protein	8	101.5	16.7	-2.6	812.1	133.68	-678.4	0.0198	0.20649
MSMEG_3107	-	hypothetical protein MSMEG_3107	6	170.7	4.5	-5.26	1023.9	26.74	-997.2	0.0199	0.20689
MSMEG_6765c	-	ABC-2 type transporter superfamily protein	4	92.7	0	-6.55	370.7	0	-370.7	0.0199	0.20689
MSMEG_5302c	-	aerobic C4-dicarboxylate transport protein	9	182.4	38.6	-2.24	1641.8	347.57	-1294.2	0.02	0.2076
MSMEG_5994c	-	putative acyl-CoA dehydrogenase	10	95.3	13.4	-2.83	953.3	133.68	-819.6	0.0201	0.20832
MSMEG_0256	-	hypothetical protein MSMEG_0256	9	207.9	32.7	-2.67	1871.3	294.1	-1577.2	0.0202	0.20839
MSMEG_0670	-	FAD dependent oxidoreductase	8	70.6	10	-2.82	564.9	80.21	-484.7	0.0202	0.20839
MSMEG_5408	lgt	prolipoprotein diacylglyceryl transferase	11	41.7	2.4	-4.1	459	26.74	-432.3	0.0202	0.20839
MSMEG_2145	-	hypothetical protein MSMEG_2145	7	65.6	3.8	-4.1	459	26.74	-432.3	0.0203	0.20846
MSMEG_3332	-	transcriptional regulator, TetR family protein	8	123.6	6.7	-4.21	988.6	53.47	-935.2	0.0203	0.20846
MSMEG_6940c	gidB	methyltransferase GidB	7	85.7	3.8	-4.49	600.2	26.74	-573.5	0.0203	0.20846
MSMEG_1699c	-	pentachlorophenol 4-monooxygenase	9	45.1	0	-5.53	406	0	-406	0.0204	0.20853
MSMEG_1974	-	propane monooxygenase coupling protein	4	61.8	0	-5.97	247.2	0	-247.2	0.0204	0.20853
MSMEG_4174c	-	transcriptional regulator, IclR family protein	13	86.9	16.5	-2.4	1129.9	213.89	-916	0.0204	0.20853
MSMEG_0666	-	acetyl-CoA synthetase, putative	16	28.7	5	-2.52	459	80.21	-378.8	0.0205	0.20892
MSMEG_5107c	-	secreted protein	8	121.4	10	-3.6	971	80.21	-890.8	0.0205	0.20892
MSMEG_0388	tylF	macrocin-O-methyltransferase	8	86.1	10	-3.1	688.5	80.21	-608.3	0.0208	0.21134
MSMEG_4442c	-	zinc-binding oxidoreductase	9	64.7	3	-4.45	582.6	26.74	-555.8	0.0208	0.21134
MSMEG_2461	-	transporter permease 2, putative	7	27.7	0	-4.85	194.2	0	-194.2	0.0209	0.21171
MSMEG_6829	-	transcriptional regulatory protein	7	98.4	7.6	-3.69	688.5	53.47	-635	0.0209	0.21171
MSMEG_1910	-	muconate cycloisomerase	11	49.8	7.3	-2.77	547.3	80.21	-467.1	0.021	0.2124
MSMEG_2953	-	ethyl tert-butyl ether degradation EthD	5	127.1	10.7	-3.57	635.5	53.47	-582.1	0.0219	0.22084
MSMEG_4742c	-	clavaldehyde dehydrogenase	5	95.3	5.3	-4.16	476.7	26.74	-449.9	0.0219	0.22084
MSMEG_0414	-	oxidoreductase, 2OG-Fe(II) oxygenase family protein	11	264.8	75.3	-1.81	2912.9	828.83	-2084.1	0.022	0.22152
MSMEG_4638c	-	vanillate O-demethylase oxidoreductase	9	66.7	5.9	-3.49	600.2	53.47	-546.8	0.0221	0.22219
MSMEG_2905	-	transcriptional regulator	8	66.2	3.3	-4.31	529.6	26.74	-502.9	0.0223	0.22353
MSMEG_4859c	-	oxidoreductase, short chain dehydrogenase/reductase family protein	7	116	7.6	-3.92	812.1	53.47	-758.6	0.0223	0.22353
MSMEG_2503c	-	hypothetical protein MSMEG_2503	9	41.2	3	-3.79	370.7	26.74	-344	0.0224	0.22387
MSMEG_6267	-	thiocyanate hydrolase gamma subunit	6	67.7	4.5	-3.92	406	26.74	-379.3	0.0224	0.22387
MSMEG_2515	xerC	site-specific tyrosine recombinase XerC	5	45.9	5.3	-3.1	229.5	26.74	-202.8	0.0225	0.2242
MSMEG_6469c	-	hypothetical protein MSMEG_6469	9	668.9	193.1	-1.79	6020	1737.87	-4282.2	0.0225	0.2242
MSMEG_6299	-	glyoxylate reductase	7	83.2	0	-6.4	582.6	0	-582.6	0.0226	0.22486
MSMEG_2241c	-	acyl-CoA synthetase	17	32.2	4.7	-2.77	547.3	80.21	-467.1	0.0228	0.22652
MSMEG_2783	-	hypothetical protein MSMEG_2783	4	101.5	6.7	-3.92	406	26.74	-379.3	0.023	0.22783
MSMEG_4444	-	hypothetical protein MSMEG_4444	9	64.7	3	-4.45	582.6	26.74	-555.8	0.023	0.22783
MSMEG_1581	-	hypothetical protein MSMEG_1581	5	233	16	-3.86	1165.2	80.21	-1085	0.0231	0.22848
MSMEG_4599c	-	hypothetical protein MSMEG_4599	27	62.8	5.9	-3.4	1694.8	160.42	-1534.4	0.0232	0.22913
MSMEG_4074	-	peroxisomal trans-2-enoyl-CoA reductase	8	35.3	0	-5.18	282.5	0	-282.5	0.0233	0.22978
MSMEG_3789	-	inner membrane permease YgbN	7	136.2	0	-7.1	953.3	0	-953.3	0.0234	0.23009
MSMEG_6580	-	transcriptional regulator family protein	5	127.1	16	-2.99	635.5	80.21	-555.3	0.0234	0.23009
MSMEG_6176	-	2-dehydro-3-deoxy-6-phosphogalactonate aldolase	4	83.9	0	-6.41	335.4	0	-335.4	0.0236	0.23135
MSMEG_6246c	-	pyridoxal-phosphate-dependent transferase	7	169	7.6	-4.47	1182.8	53.47	-1129.3	0.0236	0.23135
MSMEG_1909	-	putative HTH-type transcriptional regulator YnfL	7	118.5	7.6	-3.96	829.7	53.47	-776.3	0.0237	0.23135
MSMEG_2297	-	glutaredoxin	5	353.1	10.7	-5.05	1765.4	53.47	-1711.9	0.0237	0.23135
MSMEG_6050c	-	solute-binding lipoprotein	8	53	0	-5.75	423.7	0	-423.7	0.0237	0.23135
MSMEG_6605	-	transcriptional regulatory protein	5	28.2	0	-4.87	141.2	0	-141.2	0.0238	0.23199
MSMEG_2662	-	hypothetical protein MSMEG_2662	5	88.3	5.3	-4.05	441.4	26.74	-414.6	0.0239	0.23229
MSMEG_5285c	-	phospholipase, patatin family protein	6	164.8	13.4	-3.62	988.6	80.21	-908.4	0.0239	0.23229
MSMEG_3317	dapB	dihydrodipicolinate reductase N-terminus domain-containing protein	11	73.8	0	-6.23	812.1	0	-812.1	0.024	0.23289
MSMEG_1097	-	glycosyl transferase, group 2 family protein	6	97.1	0	-6.62	582.6	0	-582.6	0.0241	0.23289
MSMEG_3419c	-	hypothetical protein MSMEG_3419	5	116.5	5.3	-4.45	582.6	26.74	-555.8	0.0241	0.23289
MSMEG_5157	-	hypothetical protein MSMEG_5157	4	141.2	20.1	-2.82	564.9	80.21	-484.7	0.0241	0.23289
MSMEG_1547	-	glycerol dehydratase large subunit	11	122	19.4	-2.65	1341.7	213.89	-1127.8	0.0242	0.23318
MSMEG_1978	groEL	chaperonin GroEL	8	44.1	0	-5.5	353.1	0	-353.1	0.0242	0.23318
MSMEG_5702c	-	molybdenum cofactor synthesis domain-containing protein	5	250.7	48.1	-2.38	1253.4	240.63	-1012.8	0.0243	0.23381
MSMEG_4609c	-	transcriptional regulator LysR family protein	8	68.4	0	-6.12	547.3	0	-547.3	0.0244	0.23444
MSMEG_2856	-	virulence factor Mce family protein	8	35.3	0	-5.18	282.5	0	-282.5	0.0245	0.23506
MSMEG_2478c	-	fumarylacetoacetate hydrolase family protein	8	110.3	16.7	-2.72	882.7	133.68	-749	0.0246	0.23535
MSMEG_5982c	-	UDP-glucose 6-dehydrogenase	13	105.9	28.8	-1.88	1377	374.31	-1002.7	0.0246	0.23535
MSMEG_6807c	-	transcriptional regulator, TetR family protein	8	108.1	0	-6.77	865	0	-865	0.0247	0.23597
MSMEG_5816	-	hypothetical protein MSMEG_5816	15	137.7	39.2	-1.81	2065.5	588.2	-1477.3	0.0251	0.23911
MSMEG_6137	-	non-ribosomal peptide synthetase	32	190.9	69.3	-1.46	6108.3	2219.13	-3889.2	0.0251	0.23911
MSMEG_0571c	-	hydrolase, carbon-nitrogen family protein	12	50	4.5	-3.49	600.2	53.47	-546.8	0.0252	0.23938
MSMEG_2063c	nuoA	NADH dehydrogenase subunit A	11	142.8	34	-2.07	1571.2	374.31	-1196.9	0.0252	0.23938
MSMEG_1208	-	glycosyltransferase, group I	8	79.4	3.3	-4.57	635.5	26.74	-608.8	0.0254	0.24013
MSMEG_3631	-	integral membrane protein	6	82.4	4.5	-4.21	494.3	26.74	-467.6	0.0254	0.24013
MSMEG_4911	pncB	nicotinate phosphoribosyltransferase	17	120.5	29.9	-2.01	2047.9	507.99	-1539.9	0.0254	0.24013
MSMEG_2361c	-	phosphoribosylglycinamide formyltransferase	5	208.3	10.7	-4.28	1041.6	53.47	-988.1	0.0255	0.24013
MSMEG_3194	bioB	biotin synthase	4	392.8	6.7	-5.88	1571.2	26.74	-1544.5	0.0255	0.24013
MSMEG_1738c	-	transmembrane protein	4	185.4	20.1	-3.21	741.5	80.21	-661.3	0.0256	0.24013
MSMEG_2141	-	gp35 protein	7	83.2	7.6	-3.45	582.6	53.47	-529.1	0.0256	0.24013
MSMEG_2761c	-	putative secreted alanine rich protein	4	242.7	0	-7.93	971	0	-971	0.0256	0.24013
MSMEG_6893	-	hypothetical protein MSMEG_6893	8	28.7	0	-4.89	229.5	0	-229.5	0.0256	0.24013
MSMEG_2388	leuD	isopropylmalate isomerase small subunit	8	22.1	3.3	-2.72	176.5	26.74	-149.8	0.0258	0.24166
MSMEG_3485c	-	putative ECF sigma factor RpoE1	8	44.1	3.3	-3.72	353.1	26.74	-326.3	0.026	0.2432
MSMEG_6385	-	short chain dehydrogenase	8	114.8	13.4	-3.1	918	106.95	-811.1	0.0261	0.24346
MSMEG_6557c	-	dehydrogenase	7	166.5	30.6	-2.45	1165.2	213.89	-951.3	0.0261	0.24346
MSMEG_6536c	-	carboxymuconolactone decarboxylase	6	35.3	0	-5.18	211.8	0	-211.8	0.0262	0.24397
MSMEG_1131	-	tryptophan-rich sensory protein	6	64.7	4.5	-3.86	388.4	26.74	-361.7	0.0263	0.24397
MSMEG_3600	-	hypothetical protein MSMEG_3600	4	132.4	0	-7.06	529.6	0	-529.6	0.0263	0.24397
MSMEG_6039	-	oxidoreductase, electron transfer component	7	148.8	30.6	-2.28	1041.6	213.89	-827.7	0.0263	0.24397
MSMEG_0603c	-	putative acyl-CoA dehydrogenase	15	131.8	37.4	-1.82	1977.3	561.47	-1415.8	0.0264	0.24397
MSMEG_4115c	-	3-hydroxybutyryl-CoA dehydrogenase	9	37.3	3	-3.65	335.4	26.74	-308.7	0.0264	0.24397
MSMEG_5159	-	DNA-binding response regulator, putative	4	88.3	0	-6.48	353.1	0	-353.1	0.0265	0.24397
MSMEG_6130c	-	two-component sensor protein	16	101.5	18.4	-2.47	1624.2	294.1	-1330.1	0.0265	0.24397
MSMEG_0554	-	ABC transporter permease protein, putative	8	53	0	-5.75	423.7	0	-423.7	0.0266	0.24397
MSMEG_4033	-	TetR-family protein transcriptional regulator	8	39.7	0	-5.35	317.8	0	-317.8	0.0266	0.24397
MSMEG_4145c	-	cupin 2 protein	8	55.2	0	-5.81	441.4	0	-441.4	0.0266	0.24397
MSMEG_2620	-	hypothetical protein MSMEG_2620	4	83.9	0	-6.41	335.4	0	-335.4	0.0267	0.24397
MSMEG_3915c	-	NAD-dependent alcohol dehydrogenase	14	94.6	15.3	-2.63	1324.1	213.89	-1110.2	0.0267	0.24397
MSMEG_3960	-	transcriptional regulator	4	128	6.7	-4.26	512	26.74	-485.2	0.0267	0.24397
MSMEG_6244	-	TetR-family protein transcriptional regulator	7	27.7	0	-4.85	194.2	0	-194.2	0.0267	0.24397
MSMEG_3308	-	universal stress protein family protein, putative	4	39.7	0	-5.35	158.9	0	-158.9	0.0268	0.24455
MSMEG_1363	-	glucokinase	4	145.6	0	-7.2	582.6	0	-582.6	0.0269	0.2448
MSMEG_4821c	-	hypothetical protein MSMEG_4821	4	110.3	0	-6.8	441.4	0	-441.4	0.0269	0.2448
MSMEG_0598	-	hypothetical protein MSMEG_0598	4	136.8	0	-7.11	547.3	0	-547.3	0.027	0.24504
MSMEG_5024	-	T/U mismatch-specific DNA glycosylase	7	113.5	11.5	-3.31	794.4	80.21	-714.2	0.027	0.24504
MSMEG_5932c	-	hypothetical protein MSMEG_5932	18	87.3	28.2	-1.63	1571.2	507.99	-1063.2	0.0271	0.24562
MSMEG_1695c	-	phosphoglucomutase/phosphomannomutase	8	24.3	0	-4.66	194.2	0	-194.2	0.0272	0.24577
MSMEG_5411	-	hypothetical protein MSMEG_5411	9	94.2	0	-6.57	847.4	0	-847.4	0.0272	0.24577
MSMEG_0227	-	transcriptional regulator, TetR family protein	4	141.2	0	-7.15	564.9	0	-564.9	0.0273	0.24577
MSMEG_1150	-	hypothetical protein MSMEG_1150	13	47.5	10.3	-2.21	617.9	133.68	-484.2	0.0273	0.24577
MSMEG_6278c	-	metallo-beta-lactamase superfamily protein, putative	4	101.5	6.7	-3.92	406	26.74	-379.3	0.0273	0.24577
MSMEG_0795	-	ABC transporter ATP-binding protein	6	217.7	4.5	-5.61	1306.4	26.74	-1279.7	0.0274	0.24601
MSMEG_2913c	-	hydrolase	12	30.9	2.2	-3.79	370.7	26.74	-344	0.0274	0.24601
MSMEG_1157	-	short chain dehydrogenase	4	158.9	6.7	-4.57	635.5	26.74	-608.8	0.0275	0.24658
MSMEG_2487c	-	4-aminobutyrate aminotransferase	9	31.4	0	-5.02	282.5	0	-282.5	0.0276	0.24682
MSMEG_5952	-	hypothetical protein MSMEG_5952	4	110.3	0	-6.8	441.4	0	-441.4	0.0276	0.24682
MSMEG_5729c	-	hydantoin racemase	6	94.2	4.5	-4.4	564.9	26.74	-538.2	0.0278	0.24795
MSMEG_6623c	-	dehydrogenase	4	110.3	6.7	-4.05	441.4	26.74	-414.6	0.0278	0.24795
MSMEG_3262c	-	L-xylulose reductase	4	48.5	0	-5.63	194.2	0	-194.2	0.0279	0.24818
MSMEG_6818c	-	dehydrogenase	10	121.8	24.1	-2.34	1218.1	240.63	-977.5	0.0279	0.24818
MSMEG_1355	-	transcriptional regulator, TetR family protein	4	247.2	20.1	-3.62	988.6	80.21	-908.4	0.0281	0.24864
MSMEG_1941	-	helicase, UvrD/Rep family protein	11	36.9	7.3	-2.34	406	80.21	-325.8	0.0281	0.24864
MSMEG_3869c	-	hypothetical protein MSMEG_3869	8	86.1	0	-6.44	688.5	0	-688.5	0.0281	0.24864
MSMEG_6682c	-	RNA polymerase sigma-70 factor, putative	4	176.5	20.1	-3.14	706.2	80.21	-626	0.0281	0.24864
MSMEG_0551c	-	ABC nitrate/sulfonate/bicarbonate transporter, ATPase subunit	4	105.9	6.7	-3.99	423.7	26.74	-397	0.0282	0.24887
MSMEG_4307c	-	hypothetical protein MSMEG_4307	4	194.2	13.4	-3.86	776.8	53.47	-723.3	0.0282	0.24887
MSMEG_3517c	-	HAD-superfamily protein subfamily protein IB hydrolase	7	53	0	-5.75	370.7	0	-370.7	0.0283	0.249
MSMEG_5620c	-	enoyl-CoA hydratase	4	75	0	-6.25	300.1	0	-300.1	0.0283	0.249
MSMEG_0779c	-	short chain dehydrogenase	6	138.3	4.5	-4.96	829.7	26.74	-803	0.0284	0.249
MSMEG_1330c	-	MarR-family protein transcriptional regulator	4	256	40.1	-2.67	1023.9	160.42	-863.5	0.0284	0.249
MSMEG_6334c	-	ABC transporter, quaternary amine uptake transporter (QAT) family protein, substrate-binding protein	4	238.3	33.4	-2.83	953.3	133.68	-819.6	0.0284	0.249
MSMEG_3116	-	inositol-1-monophosphatase	4	167.7	855.6	2.35	670.9	3422.27	2751.4	0.0285	0.24955
MSMEG_3566	-	FadD16 protein	6	76.5	4.5	-4.1	459	26.74	-432.3	0.0286	0.2501
MSMEG_4191c	-	hypothetical protein MSMEG_4191	7	121.1	19.1	-2.66	847.4	133.68	-713.7	0.0287	0.25065
MSMEG_2171c	-	L-carnitine dehydratase/bile acid-inducible protein F	9	45.1	0	-5.53	406	0	-406	0.0288	0.25087
MSMEG_4064c	-	zinc-binding alcohol dehydrogenase	10	65.3	8	-3.03	653.2	80.21	-573	0.0288	0.25087
MSMEG_1583	groEL	chaperonin GroEL	4	97.1	6.7	-3.86	388.4	26.74	-361.7	0.0291	0.25283
MSMEG_3198c	-	hydrolase, NUDIX family protein	6	17.7	0	-4.22	105.9	0	-105.9	0.0291	0.25283
MSMEG_0567c	-	selenophosphate synthetase	9	53	3	-4.16	476.7	26.74	-449.9	0.0293	0.25368
MSMEG_4539	-	alkanesulfonate monooxygenase	13	38	2.1	-4.21	494.3	26.74	-467.6	0.0293	0.25368
MSMEG_4237c	-	transmembrane protein	4	88.3	0	-6.48	353.1	0	-353.1	0.0294	0.25368
MSMEG_4674c	tig	trigger factor	4	79.4	6.7	-3.57	317.8	26.74	-291	0.0294	0.25368
MSMEG_0107c	-	cell envelope-related function transcriptional attenuator	21	243	89.1	-1.45	5102	1871.55	-3230.5	0.0295	0.25368
MSMEG_1132c	-	FAD binding domain-containing protein	11	168.5	43.8	-1.95	1853.7	481.26	-1372.4	0.0295	0.25368
MSMEG_1456c	-	hypothetical protein MSMEG_1456	10	135.9	18.7	-2.86	1359.4	187.16	-1172.2	0.0295	0.25368
MSMEG_3714	-	hypothetical protein MSMEG_3714	9	62.8	0	-5.99	564.9	0	-564.9	0.0295	0.25368
MSMEG_1141	-	ABC-transporter integral membrane protein	4	225.1	6.7	-5.07	900.4	26.74	-873.6	0.0297	0.25474
MSMEG_3943	-	hypothetical protein MSMEG_3943	11	33.7	0	-5.12	370.7	0	-370.7	0.0297	0.25474
MSMEG_0357	-	transmembrane transport protein	6	117.7	22.3	-2.4	706.2	133.68	-572.5	0.0298	0.25516
MSMEG_0427	nirB	nitrite reductase	28	112.9	41.1	-1.46	3160.1	1149.67	-2010.4	0.0299	0.25516
MSMEG_4025c	-	transcriptional regulator, LysR family protein	12	29.4	4.5	-2.72	353.1	53.47	-299.6	0.0299	0.25516
MSMEG_6001	-	enoyl-CoA hydratase	4	101.5	6.7	-3.92	406	26.74	-379.3	0.0299	0.25516
MSMEG_0582	-	succinic semialdehyde dehydrogenase	10	109.5	0	-6.79	1094.5	0	-1094.5	0.03	0.25536
MSMEG_0864	-	membrane flanked domain-containing protein	4	158.9	13.4	-3.57	635.5	53.47	-582.1	0.03	0.25536
MSMEG_0845c	-	putative monovalent cation/H+ antiporter subunit E	3	470.8	8.9	-5.72	1412.3	26.74	-1385.6	0.0301	0.25556
MSMEG_2717c	-	hypothetical protein MSMEG_2717	6	20.6	0	-4.43	123.6	0	-123.6	0.0301	0.25556
MSMEG_5381c	-	hypothetical protein MSMEG_5381	5	116.5	0	-6.88	582.6	0	-582.6	0.0303	0.25694
MSMEG_2607	cbiM	cobalamin biosynthesis protein CbiM	7	123.6	15.3	-3.02	865	106.95	-758.1	0.0304	0.25714
MSMEG_6314c	-	haloalkane dehalogenase	10	84.7	10.7	-2.99	847.4	106.95	-740.4	0.0304	0.25714
MSMEG_4194c	-	undecaprenyl pyrophosphate phosphatase	9	21.6	0	-4.5	194.2	0	-194.2	0.0305	0.25766
MSMEG_1656	xth	exodeoxyribonuclease III	4	181	13.4	-3.76	723.8	53.47	-670.3	0.0306	0.25785
MSMEG_6501	-	hypothetical protein MSMEG_6501	4	75	0	-6.25	300.1	0	-300.1	0.0306	0.25785
MSMEG_2790c	-	hypothetical protein MSMEG_2790	6	73.6	8.9	-3.05	441.4	53.47	-387.9	0.0307	0.25837
MSMEG_5590c	-	carboxylate-amine ligase	14	20.2	3.8	-2.4	282.5	53.47	-229	0.0311	0.26141
MSMEG_2162	-	MmcJ protein	7	111	7.6	-3.86	776.8	53.47	-723.3	0.0313	0.26276
MSMEG_4873c	-	enoyl-CoA hydratase/isomerase	8	41.9	3.3	-3.65	335.4	26.74	-308.7	0.0314	0.26313
MSMEG_1899	-	succinyl-CoA:3-ketoacid-coenzyme A transferase subunit B	3	111.8	0	-6.82	335.4	0	-335.4	0.0315	0.26313
MSMEG_2007c	-	putative HpcE protein	6	114.8	8.9	-3.69	688.5	53.47	-635	0.0315	0.26313
MSMEG_5780c	pstA	phosphate ABC transporter, permease protein PstA	8	128	20.1	-2.67	1023.9	160.42	-863.5	0.0315	0.26313
MSMEG_2242	-	coniferyl aldehyde dehydrogenase	14	21.4	0	-4.49	300.1	0	-300.1	0.0317	0.26414
MSMEG_6262	-	FwdC/FmdC family protein	11	51.4	2.4	-4.4	564.9	26.74	-538.2	0.0317	0.26414
MSMEG_5856c	pcaC	hypothetical protein MSMEG_5856	4	53	13.4	-1.99	211.8	53.47	-158.4	0.0319	0.26548
MSMEG_4736c	-	hypothetical protein MSMEG_4736	10	68.9	5.3	-3.69	688.5	53.47	-635	0.0321	0.26681
MSMEG_4198	pyrD	dihydroorotate dehydrogenase 2	9	58.8	5.9	-3.31	529.6	53.47	-476.1	0.0323	0.26814
MSMEG_3669	-	hypothetical protein MSMEG_3669	10	28.2	0	-4.87	282.5	0	-282.5	0.0325	0.26947
MSMEG_6654	-	TnpC protein	17	39.5	9.4	-2.06	670.9	160.42	-510.4	0.0326	0.26996
MSMEG_1199c	-	hypothetical protein MSMEG_1199	16	152.3	56.8	-1.42	2436.3	909.04	-1527.2	0.033	0.27294
MSMEG_6728	-	hypothetical protein MSMEG_6728	7	30.3	0	-4.97	211.8	0	-211.8	0.0331	0.27343
MSMEG_1705	-	D-xylose transport ATP-binding protein XylG	14	18.9	5.7	-1.72	264.8	80.21	-184.6	0.0332	0.27358
MSMEG_3601c	-	ribose/xylose/arabinose/galactoside ABC-type transport systems, permease components	11	27.3	0	-4.82	300.1	0	-300.1	0.0332	0.27358
MSMEG_1253	-	hypothetical protein MSMEG_1253	79	159.1	85.3	-0.9	12569.7	6737.6	-5832.1	0.0334	0.27456
MSMEG_6473c	-	tetracenomycin polyketide synthesis O-methyltransferase TcmP	11	168.5	21.9	-2.95	1853.7	240.63	-1613	0.0334	0.27456
MSMEG_2116c	-	PTS system, glucose-specific IIBC component	20	95.3	29.4	-1.7	1906.6	588.2	-1318.4	0.0336	0.27587
MSMEG_2906	-	hypothetical protein MSMEG_2906	12	26.5	0	-4.78	317.8	0	-317.8	0.0337	0.27635
MSMEG_6202	-	secreted protein	11	9.6	0	-3.41	105.9	0	-105.9	0.0339	0.27765
MSMEG_6726c	-	ABC transporter, permease protein	7	121.1	3.8	-4.99	847.4	26.74	-820.7	0.0343	0.28058
MSMEG_1534	-	hypothetical protein MSMEG_1534	10	26.5	0	-4.78	264.8	0	-264.8	0.0344	0.28106
MSMEG_6515c	treS	trehalose synthase	34	315.2	151.8	-1.05	10716	5160.14	-5555.8	0.0346	0.28235
MSMEG_0154	pyk	pyruvate kinase	7	40.4	3.8	-3.4	282.5	26.74	-255.7	0.0348	0.28295
MSMEG_2723	recA	protein RecA	11	33.7	0	-5.12	370.7	0	-370.7	0.0348	0.28295
MSMEG_2907c	-	oxidoreductase YeiQ	11	28.9	0	-4.9	317.8	0	-317.8	0.0348	0.28295
MSMEG_3044	pyrC	dihydroorotase	7	53	0	-5.75	370.7	0	-370.7	0.0349	0.28342
MSMEG_1578	-	peptidase M22, glycoprotease	7	103.4	3.8	-4.76	723.8	26.74	-697.1	0.035	0.28355
MSMEG_1811c	maf	Maf-like protein	3	141.2	0	-7.15	423.7	0	-423.7	0.035	0.28355
MSMEG_2394	-	cystathionine gamma-lyase	12	64.7	4.5	-3.86	776.8	53.47	-723.3	0.0352	0.28414
MSMEG_3469c	-	TetR family protein transcriptional regulator	5	201.3	5.3	-5.23	1006.3	26.74	-979.5	0.0352	0.28414
MSMEG_6218	-	secreted protein	10	190.7	42.8	-2.16	1906.6	427.78	-1478.9	0.0352	0.28414
MSMEG_0140	-	mce associated membrane protein	8	172.1	46.8	-1.88	1377	374.31	-1002.7	0.0353	0.2846
MSMEG_0876c	-	short chain dehydrogenase	6	194.2	22.3	-3.12	1165.2	133.68	-1031.5	0.0355	0.28587
MSMEG_1459	-	Rieske (2Fe-2S) domain-containing protein	5	84.7	0	-6.42	423.7	0	-423.7	0.0356	0.28599
MSMEG_4547c	-	acyl-CoA dehydrogenase family protein	11	33.7	4.9	-2.79	370.7	53.47	-317.3	0.0356	0.28599
MSMEG_0002	-	6-phosphogluconate dehydrogenase-like protein	10	111.2	10.7	-3.38	1112.2	106.95	-1005.3	0.0358	0.28623
MSMEG_3444c	-	choline dehydrogenase	16	94.9	23.4	-2.02	1518.2	374.31	-1143.9	0.0358	0.28623
MSMEG_3776c	argC	N-acetyl-gamma-glutamyl-phosphate reductase	10	38.8	2.7	-3.86	388.4	26.74	-361.7	0.0358	0.28623
MSMEG_4724	-	oligoribonuclease	11	67.4	14.6	-2.21	741.5	160.42	-581.1	0.0358	0.28623
MSMEG_0966c	-	hypothetical protein MSMEG_0966	4	145.6	6.7	-4.45	582.6	26.74	-555.8	0.0361	0.28794
MSMEG_3119c	-	ABC transporter, ATP-binding subunit	7	17.7	0	-4.22	123.6	0	-123.6	0.0361	0.28794
MSMEG_0223	-	hypothetical protein MSMEG_0223	5	95.3	0	-6.59	476.7	0	-476.7	0.0363	0.28851
MSMEG_4143	-	hypothetical protein MSMEG_4143	7	83.2	11.5	-2.86	582.6	80.21	-502.4	0.0363	0.28851
MSMEG_4722	-	short-chain dehydrogenase	7	35.3	0	-5.18	247.2	0	-247.2	0.0363	0.28851
MSMEG_4271	-	hypothetical protein MSMEG_4271	10	183.6	13.4	-3.78	1836	133.68	-1702.3	0.0365	0.28976
MSMEG_4637c	-	hypothetical protein MSMEG_4637	13	59.8	2.1	-4.86	776.8	26.74	-750	0.0366	0.28987
MSMEG_6757c	-	glycerol operon regulatory protein	5	173	10.7	-4.02	865	53.47	-811.6	0.0366	0.28987
MSMEG_0133	-	ABC-transporter integral membrane protein	11	272.8	85.1	-1.68	3001.2	935.78	-2065.4	0.0367	0.29031
MSMEG_0717c	-	aldose 1-epimerase subfamily protein	11	105.9	14.6	-2.86	1165.2	160.42	-1004.7	0.0368	0.29053
MSMEG_1043c	-	GntR-family protein transcriptional regulator	12	107.4	20.1	-2.42	1288.7	240.63	-1048.1	0.0369	0.29053
MSMEG_3598c	-	periplasmic sugar-binding proteins	5	74.1	0	-6.23	370.7	0	-370.7	0.0369	0.29053
MSMEG_6722	-	hypothetical protein MSMEG_6722	14	49.2	11.5	-2.1	688.5	160.42	-528.1	0.0369	0.29053
MSMEG_2058c	nuoF	NADH-quinone oxidoreductase, F subunit	22	35.3	9.7	-1.86	776.8	213.89	-562.9	0.037	0.29097
MSMEG_3929c	-	[NiFe] hydrogenase, delta subunit, putative [Mycobacterium smegmatis str. MC2 155]	10	51.2	10.7	-2.26	512	106.95	-405	0.0373	0.29299
MSMEG_2481	-	hypothetical protein MSMEG_2481	20	42.4	9.4	-2.18	847.4	187.16	-660.2	0.0374	0.29343
MSMEG_4077	-	enoyl-CoA hydratase	11	35.3	2.4	-3.86	388.4	26.74	-361.7	0.0376	0.29431
MSMEG_5368	ehuB	ectoine/hydroxyectoine ABC transporter solute-binding protein	6	85.3	4.5	-4.26	512	26.74	-485.2	0.0376	0.29431
MSMEG_5934c	-	hypothetical protein MSMEG_5934	7	166.5	3.8	-5.45	1165.2	26.74	-1138.4	0.0378	0.29554
MSMEG_4091c	ssuD	nitrilotriacetate monooxygenase component A	11	27.3	0	-4.82	300.1	0	-300.1	0.0379	0.29597
MSMEG_2463	-	nicotine dehydrogenase chain A	11	38.5	0	-5.3	423.7	0	-423.7	0.0382	0.29797
MSMEG_3004	-	hypothetical protein MSMEG_3004	6	29.4	4.5	-2.72	176.5	26.74	-149.8	0.0384	0.29918
MSMEG_1203c	-	methoxy mycolic acid synthase 1	17	114.2	39.3	-1.54	1941.9	668.41	-1273.5	0.0385	0.29961
MSMEG_0197c	-	nudix hydrolase	6	105.9	4.5	-4.57	635.5	26.74	-608.8	0.0386	0.2997
MSMEG_5442	-	glutamate dehydrogenase	17	161	64.5	-1.32	2736.4	1096.2	-1640.2	0.0386	0.2997
MSMEG_0333	-	carboxyl transferase domain-containing protein	21	90.8	25.5	-1.83	1906.6	534.73	-1371.9	0.0387	0.30013
MSMEG_0884	-	glyoxalase family protein	6	41.2	4.5	-3.21	247.2	26.74	-220.4	0.0388	0.30055
MSMEG_3426c	-	short chain dehydrogenase	8	24.3	3.3	-2.86	194.2	26.74	-167.5	0.0389	0.30064
MSMEG_3772c	argF	ornithine carbamoyltransferase	4	194.2	13.4	-3.86	776.8	53.47	-723.3	0.0389	0.30064
MSMEG_3577c	-	calpastatin	7	55.5	3.8	-3.86	388.4	26.74	-361.7	0.039	0.30072
MSMEG_5993c	-	putative acyl-CoA dehydrogenase	12	58.8	6.7	-3.14	706.2	80.21	-626	0.039	0.30072
MSMEG_1368	rpoC	DNA-directed RNA polymerase subunit beta'	46	8.8	86.6	3.29	406	3983.74	3577.7	0.0392	0.30122
MSMEG_3250	-	ABC transporter, ATP-binding protein	5	137.7	5.3	-4.69	688.5	26.74	-661.8	0.0392	0.30122
MSMEG_3362c	-	enoyl-CoA hydratase	6	44.1	4.5	-3.31	264.8	26.74	-238.1	0.0392	0.30122
MSMEG_4667c	-	transcriptional regulator, LysR family protein	7	290	68.8	-2.08	2030.2	481.26	-1549	0.0394	0.30207
MSMEG_5323c	-	hypothetical protein MSMEG_5323	12	122.1	33.4	-1.87	1465.3	401.05	-1064.2	0.0394	0.30207
MSMEG_3440	sdaA	L-serine ammonia-lyase	16	177.6	43.4	-2.03	2842.3	695.15	-2147.1	0.0395	0.30249
MSMEG_3393	-	putative acyl-CoA dehydrogenase	8	44.1	10	-2.14	353.1	80.21	-272.9	0.0396	0.30291
MSMEG_6136c	-	membrane protein, TerC family protein	16	292.4	138.7	-1.08	4678.3	2219.13	-2459.2	0.0405	0.30944
MSMEG_0762c	-	cytochrome P450 FAS1	8	125.8	20.1	-2.65	1006.3	160.42	-845.9	0.0407	0.31061
MSMEG_0316	-	putative NagC regulator	9	96.1	11.9	-3.02	865	106.95	-758.1	0.0409	0.31108
MSMEG_1515c	-	two-component sensor histidine kinase	14	235.8	66.8	-1.82	3301.3	935.78	-2365.5	0.0409	0.31108
MSMEG_2922c	-	hypothetical protein MSMEG_2922	8	37.5	3.3	-3.49	300.1	26.74	-273.4	0.0409	0.31108
MSMEG_2097c	-	Acyl-coenzyme A:6-aminopenicillanic acid acyl-transferase	18	72.6	20.8	-1.8	1306.4	374.31	-932.1	0.041	0.31149
MSMEG_4866c	mhpA	3-(3-hydroxyphenyl)propionate hydroxylase	13	96.4	24.7	-1.97	1253.4	320.84	-932.6	0.0412	0.31265
MSMEG_2062c	nuoB	NADH dehydrogenase subunit B	6	120.6	13.4	-3.17	723.8	80.21	-643.6	0.0413	0.31306
MSMEG_6729c	-	DNA-binding protein	12	283.9	102.5	-1.47	3407.2	1229.88	-2177.3	0.0415	0.31422
MSMEG_2167	-	aminopeptidase, putative	16	41.9	13.4	-1.65	670.9	213.89	-457	0.0416	0.31427
MSMEG_4766c	ltrA	low temperature requirement protein LtrA	13	298.8	96.7	-1.63	3883.9	1256.62	-2627.3	0.0416	0.31427
MSMEG_2529c	-	glyoxylate reductase	7	98.4	11.5	-3.1	688.5	80.21	-608.3	0.0418	0.31507
MSMEG_2981c	-	branched-chain amino acid ABC-type transport system, permease component	8	35.3	6.7	-2.4	282.5	53.47	-229	0.0418	0.31507
MSMEG_5149c	pimE	mannosyltransferase	14	242.1	76.4	-1.66	3389.6	1069.46	-2320.1	0.0419	0.31547
MSMEG_2865	-	hypothetical protein MSMEG_2865	8	86.1	10	-3.1	688.5	80.21	-608.3	0.042	0.31552
MSMEG_5574c	-	substrate binding protein	18	89.3	16.3	-2.45	1606.5	294.1	-1312.4	0.042	0.31552
MSMEG_1929c	-	hypothetical protein MSMEG_1929	12	94.2	1156.4	3.62	1129.9	13876.2	12746.4	0.0423	0.3171
MSMEG_2036	-	hydrolase, alpha/beta fold family protein	8	24.3	3.3	-2.86	194.2	26.74	-167.5	0.0424	0.3171
MSMEG_2777	-	alpha/beta hydrolase fold	10	81.2	24.1	-1.75	812.1	240.63	-571.5	0.0424	0.3171
MSMEG_3286c	-	methyltransferase	11	40.1	9.7	-2.05	441.4	106.95	-334.4	0.0424	0.3171
MSMEG_0608	-	glyoxalase family protein	6	67.7	0	-6.1	406	0	-406	0.0426	0.31824
MSMEG_5596	-	oxidoreductase	6	50	0	-5.67	300.1	0	-300.1	0.0427	0.31828
MSMEG_6805	-	beta-lactamase	13	169.8	35	-2.28	2206.8	454.52	-1752.2	0.0427	0.31828
MSMEG_3872	cobH	precorrin-8X methylmutase	4	185.4	6.7	-4.79	741.5	26.74	-714.7	0.0429	0.31942
MSMEG_5557c	-	hypothetical protein MSMEG_5557	5	194.2	5.3	-5.18	971	26.74	-944.2	0.0431	0.32055
MSMEG_6758	-	transport integral membrane protein	9	156.9	29.7	-2.4	1412.3	267.36	-1145	0.0435	0.32317
MSMEG_2005c	-	sugar phosphate isomerase/epimerase	8	26.5	0	-4.78	211.8	0	-211.8	0.0436	0.3232
MSMEG_4901c	rph	ribonuclease PH	5	169.5	5.3	-4.99	847.4	26.74	-820.7	0.0436	0.3232
MSMEG_2986c	-	amidohydrolase, AtzE family protein	9	29.4	3	-3.31	264.8	26.74	-238.1	0.0437	0.32358
MSMEG_3936c	-	universal stress protein family protein	8	75	3.3	-4.49	600.2	26.74	-573.5	0.044	0.32509
MSMEG_4887c	-	cytochrome P450	12	57.4	4.5	-3.69	688.5	53.47	-635	0.044	0.32509
MSMEG_2198c	-	hypothetical protein MSMEG_2198	17	164.1	44	-1.9	2789.3	748.62	-2040.7	0.0441	0.32547
MSMEG_4829	-	cytochrome P450	15	107.1	33.9	-1.66	1606.5	507.99	-1098.5	0.0443	0.32623
MSMEG_5907	-	acyl-CoA dehydrogenase	8	46.3	3.3	-3.79	370.7	26.74	-344	0.0443	0.32623
MSMEG_1955c	-	hypothetical protein MSMEG_1955	5	134.2	0	-7.08	670.9	0	-670.9	0.0444	0.32661
MSMEG_6005	-	hypothetical protein MSMEG_6005	5	14.1	0	-3.92	70.6	0	-70.6	0.0445	0.32698
MSMEG_3002	-	para-nitrobenzyl esterase	13	127.7	41.1	-1.63	1659.5	534.73	-1124.7	0.0447	0.32773
MSMEG_6898c	-	hypothetical protein MSMEG_6898	5	102.4	0	-6.69	512	0	-512	0.0447	0.32773
MSMEG_2961	secD	preprotein translocase subunit SecD	19	4.6	0	-2.5	88.3	0	-88.3	0.0448	0.32811
MSMEG_0327	-	aldehyde dehydrogenase	18	171.6	68.3	-1.33	3089.5	1229.88	-1859.6	0.0449	0.32848
MSMEG_4188c	-	short chain dehydrogenase	8	108.1	6.7	-4.02	865	53.47	-811.6	0.045	0.32886
MSMEG_1373	-	ribose/xylose/arabinose/galactoside ABC-type transport systems, permease components	11	44.9	2.4	-4.21	494.3	26.74	-467.6	0.0452	0.32889
MSMEG_3922	-	hypothetical protein MSMEG_3922	7	35.3	3.8	-3.21	247.2	26.74	-220.4	0.0452	0.32889
MSMEG_5681c	-	ferredoxin/ferredoxin--NADP reductase	12	186.8	35.6	-2.39	2242.1	427.78	-1814.3	0.0452	0.32889
MSMEG_6672	-	type I phosphodiesterase / nucleotide pyrophosphatase superfamily protein	9	47.1	8.9	-2.4	423.7	80.21	-343.5	0.0452	0.32889
MSMEG_0087c	-	glucitol operon repressor	4	229.5	20.1	-3.52	918	80.21	-837.8	0.0455	0.33035
MSMEG_4006c	-	transcriptional regulator, CdaR, putative	11	30.5	4.9	-2.65	335.4	53.47	-282	0.0455	0.33035
MSMEG_1060c	-	putative Lsr2 protein	4	110.3	0	-6.8	441.4	0	-441.4	0.0456	0.33072
MSMEG_4393	-	carboxyvinyl-carboxyphosphonate phosphorylmutase	13	14.9	2.1	-2.86	194.2	26.74	-167.5	0.0457	0.33073
MSMEG_5506c	-	hypothetical protein MSMEG_5506	5	81.2	5.3	-3.92	406	26.74	-379.3	0.0457	0.33073
MSMEG_3671c	-	integral membrane protein	6	182.4	22.3	-3.03	1094.5	133.68	-960.9	0.0458	0.3311
MSMEG_2496	-	NAD-binding protein	5	77.7	5.3	-3.86	388.4	26.74	-361.7	0.046	0.33183
MSMEG_2918c	-	short-chain dehydrogenase/reductase SDR	5	113	0	-6.83	564.9	0	-564.9	0.046	0.33183
MSMEG_0940	-	hypothetical protein MSMEG_0940	8	44.1	3.3	-3.72	353.1	26.74	-326.3	0.0462	0.33292
MSMEG_3532c	-	serine/threonine dehydratase family protein	9	43.2	3	-3.86	388.4	26.74	-361.7	0.0463	0.33292
MSMEG_6903	-	transcriptional regulator, PadR family protein	8	30.9	3.3	-3.21	247.2	26.74	-220.4	0.0463	0.33292
MSMEG_2840c	-	hypothetical protein MSMEG_2840	7	128.6	22.9	-2.49	900.4	160.42	-739.9	0.0464	0.33293
MSMEG_6724c	-	ABC-type cobalt transport system	5	67.1	0	-6.09	335.4	0	-335.4	0.0464	0.33293
MSMEG_2108	-	hypothetical protein MSMEG_2108	9	98.1	11.9	-3.05	882.7	106.95	-775.8	0.0466	0.33365
MSMEG_3366	-	isonitrile hydratase, putative	7	58	7.6	-2.92	406	53.47	-352.6	0.0466	0.33365
MSMEG_1362	-	hypothetical protein MSMEG_1362	4	48.5	0	-5.63	194.2	0	-194.2	0.0469	0.33544
MSMEG_4410c	-	hypothetical protein MSMEG_4410	5	35.3	0	-5.18	176.5	0	-176.5	0.0471	0.33616
MSMEG_6309	-	ABC transporter, ATP-binding protein	5	53	0	-5.75	264.8	0	-264.8	0.0471	0.33616
MSMEG_1198	-	hypothetical protein MSMEG_1198	5	127.1	5.3	-4.57	635.5	26.74	-608.8	0.0472	0.33651
MSMEG_2789c	-	acetyltransferase, GNAT family protein	5	162.4	5.3	-4.92	812.1	26.74	-785.3	0.0473	0.33651
MSMEG_5809	-	lipoprotein YaeC, putative	9	37.3	3	-3.65	335.4	26.74	-308.7	0.0473	0.33651
MSMEG_0760	-	thioesterase family protein	5	127.1	0	-7	635.5	0	-635.5	0.0474	0.33651
MSMEG_6606c	-	hypothetical protein MSMEG_6606	4	167.7	6.7	-4.65	670.9	26.74	-644.1	0.0474	0.33651
MSMEG_6106	-	epoxide hydrolase	11	102.7	26.7	-1.94	1129.9	294.1	-835.8	0.0475	0.33686
MSMEG_1823c	-	hypothetical protein MSMEG_1823	5	215.4	10.7	-4.33	1076.9	53.47	-1023.4	0.0477	0.33686
MSMEG_2437	rimM	16S rRNA-processing protein	4	30.9	0	-5	123.6	0	-123.6	0.0477	0.33686
MSMEG_3877c	cobM	precorrin-4 C11-methyltransferase	8	125.8	6.7	-4.23	1006.3	53.47	-952.8	0.0477	0.33686
MSMEG_5938	-	hypothetical protein MSMEG_5938	9	215.8	47.5	-2.18	1941.9	427.78	-1514.2	0.0477	0.33686
MSMEG_2183c	-	hypothetical protein MSMEG_2183	5	208.3	5.3	-5.28	1041.6	26.74	-1014.9	0.0479	0.33756
MSMEG_3854c	-	putative aliphatic sulfonates transport permease protein SsuC	5	70.6	5.3	-3.72	353.1	26.74	-326.3	0.0479	0.33756
MSMEG_1482c	-	methyltransferase	5	155.4	16	-3.28	776.8	80.21	-696.6	0.0481	0.33826
MSMEG_3306	-	zinc-binding alcohol dehydrogenase	5	102.4	5.3	-4.26	512	26.74	-485.2	0.0481	0.33826
MSMEG_1017	-	glutaredoxin	5	406	21.4	-4.25	2030.2	106.95	-1923.3	0.0482	0.33861
MSMEG_3637	-	CBS domain-containing protein	5	158.9	32.1	-2.31	794.4	160.42	-634	0.0484	0.33966
MSMEG_3483	-	mosc domain-containing protein	5	141.2	5.3	-4.72	706.2	26.74	-679.4	0.0485	0.34001
MSMEG_5242c	-	acyltransferase, ws/dgat/mgat subfamily protein	5	53	0	-5.75	264.8	0	-264.8	0.0486	0.34035
MSMEG_0819	-	N-carbamoyl-L-amino acid amidohydrolase	10	33.5	5.3	-2.65	335.4	53.47	-282	0.0487	0.3407
MSMEG_0594c	-	iron-sulfur cluster binding protein	9	35.3	5.9	-2.57	317.8	53.47	-264.3	0.0488	0.34103
MSMEG_5239	glpX	fructose 1,6-bisphosphatase II	7	105.9	7.6	-3.79	741.5	53.47	-688	0.0489	0.34103
MSMEG_6332c	-	amino acid ABC transporter, permease protein	5	102.4	5.3	-4.26	512	26.74	-485.2	0.0489	0.34103
MSMEG_0368	-	hypothetical protein MSMEG_0368	10	84.7	24.1	-1.82	847.4	240.63	-606.8	0.049	0.34137
MSMEG_2899	-	short chain dehydrogenase	6	108.9	0	-6.78	653.2	0	-653.2	0.0491	0.34172
MSMEG_4348c	-	hypothetical protein MSMEG_4348	9	54.9	5.9	-3.21	494.3	53.47	-440.8	0.0493	0.34275
MSMEG_5241c	-	GAF family protein	5	88.3	0	-6.48	441.4	0	-441.4	0.0494	0.34309
MSMEG_0516	-	sugar transport system	15	96.5	26.7	-1.85	1447.6	401.05	-1046.6	0.0498	0.34516
MSMEG_2896	-	hypothetical protein MSMEG_2896	9	41.2	3	-3.79	370.7	26.74	-344	0.0498	0.34516
MSMEG_5949c	-	hypothetical protein MSMEG_5949	21	82.4	24.2	-1.77	1730.1	507.99	-1222.1	0.0499	0.34549
MSMEG_3007c	-	succinate-semialdehyde dehydrogenase	15	54.1	8.9	-2.6	812.1	133.68	-678.4	0.0501	0.34652
MSMEG_1736	-	glycerol-3-phosphate dehydrogenase 2	20	138.6	54.8	-1.34	2771.7	1096.2	-1675.5	0.0502	0.34686
MSMEG_2877c	-	hypothetical protein MSMEG_2877	7	80.7	15.3	-2.4	564.9	106.95	-458	0.0507	0.34995
MSMEG_1650c	-	methyltransferase type 11	5	165.9	21.4	-2.96	829.7	106.95	-722.8	0.0509	0.35058
MSMEG_3564c	bfr	bacterioferritin	7	65.6	3.8	-4.1	459	26.74	-432.3	0.0509	0.35058
MSMEG_1119	-	glutamine amidotransferase, class I	10	90	16	-2.49	900.4	160.42	-739.9	0.051	0.35058
MSMEG_3957c	-	13e12 repeat-containing protein	13	81.5	14.4	-2.5	1059.2	187.16	-872.1	0.051	0.35058
MSMEG_1495	-	HAD-superfamily protein hydrolase subfamily protein IA, variant 3, putative	5	278.9	5.3	-5.7	1394.7	26.74	-1367.9	0.0511	0.35091
MSMEG_6890	-	antibiotic biosynthesis monooxygenase domain-containing protein	5	187.1	10.7	-4.13	935.7	53.47	-882.2	0.0513	0.35192
MSMEG_4560c	-	periplasmic binding protein	9	64.7	8.9	-2.86	582.6	80.21	-502.4	0.0515	0.35293
MSMEG_1613	-	ABC polar amino acid transporter, inner membrane subunit	6	76.5	4.5	-4.1	459	26.74	-432.3	0.0517	0.35358
MSMEG_4212	-	transcriptional regulatory protein CitT	6	97.1	13.4	-2.86	582.6	80.21	-502.4	0.0517	0.35358
MSMEG_1754	-	hypothetical protein MSMEG_1754	4	251.6	6.7	-5.23	1006.3	26.74	-979.5	0.0518	0.35391
MSMEG_3337c	-	hypothetical protein MSMEG_3337	5	45.9	0	-5.55	229.5	0	-229.5	0.0519	0.35423
MSMEG_2719c	-	hydrogen:quinone oxidoreductase	25	60	21.4	-1.49	1500.6	534.73	-965.9	0.0522	0.35519
MSMEG_3244	-	hypothetical protein MSMEG_3244	7	88.3	7.6	-3.53	617.9	53.47	-564.4	0.0522	0.35519
MSMEG_3548	ehuC	ectoine/hydroxyectoine ABC transporter, permease protein EhuC	7	60.5	3.8	-3.99	423.7	26.74	-397	0.0522	0.35519
MSMEG_6701	-	amino acid permease	24	122.8	62.4	-0.98	2948.2	1497.24	-1451	0.0523	0.35551
MSMEG_0371c	-	MaoC like domain-containing protein	7	40.4	3.8	-3.4	282.5	26.74	-255.7	0.0524	0.35583
MSMEG_2273	hypF	[NiFe] hydrogenase maturation protein HypF [Mycobacterium smegmatis str. MC2 155]	21	36.1	8.9	-2.02	759.1	187.16	-572	0.0526	0.35683
MSMEG_4300c	-	transcription regulator AmtR	5	180.1	16	-3.49	900.4	80.21	-820.1	0.0527	0.3571
MSMEG_3946c	-	transmembrane protein	6	41.2	4.5	-3.21	247.2	26.74	-220.4	0.0528	0.3571
MSMEG_4876c	-	acyl-CoA synthase	15	21.2	3.6	-2.57	317.8	53.47	-264.3	0.0528	0.3571
MSMEG_1455	-	putative multidrug resistance protein	10	151.8	21.4	-2.83	1518.2	213.89	-1304.4	0.0529	0.35742
MSMEG_3476c	-	peptidase, M48 family protein	11	139.6	43.8	-1.67	1535.9	481.26	-1054.6	0.0531	0.35841
MSMEG_5564	-	NAD(P)H dehydrogenase, quinone family protein	15	38.8	10.7	-1.86	582.6	160.42	-422.2	0.0532	0.35873
MSMEG_0773	-	acetyltransferase	11	91.5	17	-2.43	1006.3	187.16	-819.1	0.054	0.3637
MSMEG_2482	-	hypothetical protein MSMEG_2482	7	47.9	3.8	-3.65	335.4	26.74	-308.7	0.0541	0.3637
MSMEG_6220	-	lipoprotein	7	45.4	7.6	-2.57	317.8	53.47	-264.3	0.0541	0.3637
MSMEG_2505c	-	3-isopropylmalate dehydratase large subunit	13	42.1	8.2	-2.36	547.3	106.95	-440.3	0.0542	0.36401
MSMEG_5258c	-	steroid delta-isomerase	4	242.7	40.1	-2.6	971	160.42	-810.6	0.055	0.36894
MSMEG_1136	-	hypothetical protein MSMEG_1136	6	100	17.8	-2.49	600.2	106.95	-493.3	0.0551	0.36894
MSMEG_2195c	-	transcriptional regulator, TetR family protein	8	214.1	56.8	-1.91	1712.4	454.52	-1257.9	0.0551	0.36894
MSMEG_6552c	-	hypothetical protein MSMEG_6552	4	61.8	6.7	-3.21	247.2	26.74	-220.4	0.0554	0.37058
MSMEG_2755c	-	hypothetical protein MSMEG_2755	12	189.8	726.3	1.94	2277.4	8716.1	6438.7	0.0555	0.37088
MSMEG_3996c	hydA	dihydropyrimidinase	28	86.4	28.6	-1.59	2418.6	802.09	-1616.5	0.0557	0.37185
MSMEG_3058	-	lipoprotein, nlpa family protein	10	102.4	24.1	-2.09	1023.9	240.63	-783.3	0.0558	0.37215
MSMEG_5908	-	acyl-CoA synthetase	19	117.1	33.8	-1.79	2224.4	641.68	-1582.7	0.0562	0.37444
MSMEG_0402	-	linear gramicidin synthetase subunit D	84	270.3	172.5	-0.65	22703.1	14491.2	-8211.9	0.0563	0.37474
MSMEG_5642	-	acetyl-coenzyme a carboxylase carboxyl transferase	11	107.5	24.3	-2.15	1182.8	267.36	-915.5	0.0564	0.37495
MSMEG_4784	-	hypothetical protein MSMEG_4784	10	26.5	5.3	-2.31	264.8	53.47	-211.3	0.0565	0.37495
MSMEG_6061	-	hypothetical protein MSMEG_6061	9	198.1	41.6	-2.25	1783.1	374.31	-1408.7	0.0565	0.37495
MSMEG_0252c	trmB	tRNA (guanine-N(7))-methyltransferase	6	105.9	4.5	-4.57	635.5	26.74	-608.8	0.0566	0.37525
MSMEG_1748	-	hypothetical protein MSMEG_1748	6	35.3	0	-5.18	211.8	0	-211.8	0.0568	0.37583
MSMEG_6029	-	hypothetical protein MSMEG_6029	13	122.2	30.8	-1.99	1588.9	401.05	-1187.8	0.0568	0.37583
MSMEG_3559	-	short chain dehydrogenase	9	86.3	14.9	-2.54	776.8	133.68	-643.1	0.0569	0.37612
MSMEG_2706c	gmhA	phosphoheptose isomerase	6	47.1	0	-5.59	282.5	0	-282.5	0.0571	0.37707
MSMEG_4559c	-	ABC transporter, membrane spanning protein	6	35.3	0	-5.18	211.8	0	-211.8	0.0573	0.37802
MSMEG_4164c	-	3-hydroxybutyryl-CoA dehydratase	6	35.3	0	-5.18	211.8	0	-211.8	0.0575	0.37897
MSMEG_0994c	resD	DNA-binding response regulator ResD	6	47.1	4.5	-3.4	282.5	26.74	-255.7	0.0578	0.38011
MSMEG_2209	-	transcriptional regulator, GntR family protein	6	23.5	0	-4.62	141.2	0	-141.2	0.0578	0.38011
MSMEG_0592	-	putative rhamnose catabolism operon transcriptional regulator	5	141.2	5.3	-4.72	706.2	26.74	-679.4	0.0579	0.38011
MSMEG_5902c	-	hypothetical protein MSMEG_5902	4	295.7	26.7	-3.47	1182.8	106.95	-1075.9	0.0579	0.38011
MSMEG_0259	-	enoyl-CoA hydratase/isomerase	4	141.2	13.4	-3.4	564.9	53.47	-511.5	0.0582	0.38134
MSMEG_4763	-	ABC transporter permease protein	12	97.1	26.7	-1.86	1165.2	320.84	-844.3	0.0582	0.38134
MSMEG_4190c	-	inositol monophosphatase family protein	8	240.5	70.2	-1.78	1924.3	561.47	-1362.8	0.0584	0.38174
MSMEG_5671	-	YbaK/prolyl-tRNA synthetase associated region	4	158.9	6.7	-4.57	635.5	26.74	-608.8	0.0585	0.38174
MSMEG_0943	proC	pyrroline-5-carboxylate reductase	9	96.1	32.7	-1.56	865	294.1	-570.9	0.0586	0.38174
MSMEG_5486c	-	peptidase S1 and S6, chymotrypsin/Hap	9	76.5	0	-6.28	688.5	0	-688.5	0.0586	0.38174
MSMEG_3638	-	CBS domain-containing protein	7	194.2	84	-1.21	1359.4	588.2	-771.2	0.0587	0.38174
MSMEG_2040	-	hypothetical protein MSMEG_2040	6	14.7	0	-3.97	88.3	0	-88.3	0.0588	0.38174
MSMEG_3268	-	ABC transporter, permease protein	11	123.6	29.2	-2.08	1359.4	320.84	-1038.5	0.0588	0.38174
MSMEG_4643c	-	resuscitation-promoting factor	4	176.5	6.7	-4.72	706.2	26.74	-679.4	0.0588	0.38174
MSMEG_1073c	-	short chain dehydrogenase	8	83.9	6.7	-3.65	670.9	53.47	-617.4	0.0589	0.38174
MSMEG_1381	-	MmpS5 protein	5	158.9	37.4	-2.09	794.4	187.16	-607.3	0.0589	0.38174
MSMEG_5857c	-	oxidoreductase	6	47.1	0	-5.59	282.5	0	-282.5	0.0589	0.38174
MSMEG_0446	-	putrescine importer	20	258.6	84.2	-1.62	5172.6	1684.4	-3488.2	0.059	0.38174
MSMEG_3878c	cobL	precorrin-6Y C5,15-methyltransferase (decarboxylating)	6	85.3	8.9	-3.26	512	53.47	-458.5	0.059	0.38174
MSMEG_1265c	-	hypothetical protein MSMEG_1265	21	132.8	42	-1.66	2789.3	882.3	-1907	0.0592	0.3823
MSMEG_5824c	purL	phosphoribosylformylglycinamidine synthase II	21	53	161.7	1.61	1112.2	3395.54	2283.3	0.0592	0.3823
MSMEG_0809	-	isoprenylcysteine carboxyl methyltransferase	6	79.4	4.5	-4.16	476.7	26.74	-449.9	0.0595	0.38386
MSMEG_2341c	-	hypothetical protein MSMEG_2341	6	47.1	4.5	-3.4	282.5	26.74	-255.7	0.0599	0.38441
MSMEG_6054	-	hypothetical protein MSMEG_6054	6	58.8	4.5	-3.72	353.1	26.74	-326.3	0.0599	0.38441
MSMEG_6328c	-	hypothetical protein MSMEG_6328	3	123.6	0	-6.96	370.7	0	-370.7	0.0599	0.38441
MSMEG_6590	-	hypothetical protein MSMEG_6590	4	238.3	20.1	-3.57	953.3	80.21	-873.1	0.0599	0.38441
MSMEG_4292	-	integral membrane protein	6	73.6	4.5	-4.05	441.4	26.74	-414.6	0.06	0.38441
MSMEG_0785c	-	hypothetical protein MSMEG_0785	6	135.3	0	-7.09	812.1	0	-812.1	0.0601	0.38441
MSMEG_0825c	thiD	phosphomethylpyrimidine kinase	6	44.1	0	-5.5	264.8	0	-264.8	0.0601	0.38441
MSMEG_2568	-	LipW protein	6	17.7	0	-4.22	105.9	0	-105.9	0.0601	0.38441
MSMEG_6128c	-	two-component system response regulator	6	97.1	8.9	-3.45	582.6	53.47	-529.1	0.0601	0.38441
MSMEG_4849	-	carveol dehydrogenase	6	91.2	0	-6.53	547.3	0	-547.3	0.0602	0.38468
MSMEG_1420c	-	transcriptional regulatory protein	9	96.1	5.9	-4.02	865	53.47	-811.6	0.0606	0.38687
MSMEG_5206	-	regulatory protein	6	38.3	0	-5.29	229.5	0	-229.5	0.0608	0.38778
MSMEG_0636c	-	hypothetical protein MSMEG_0636	11	183	55.9	-1.71	2012.6	614.94	-1397.6	0.0611	0.38896
MSMEG_3768	-	macrolide ABC transporter ATP-binding protein	15	129.5	41	-1.66	1941.9	614.94	-1327	0.0611	0.38896
MSMEG_6014	-	putative acyl-CoA dehydrogenase	7	37.8	0	-5.28	264.8	0	-264.8	0.0613	0.38986
MSMEG_3695	-	hypothetical protein MSMEG_3695	12	25	2.2	-3.49	300.1	26.74	-273.4	0.0614	0.39013
MSMEG_3823	-	3-oxoacyl-	6	44.1	4.5	-3.31	264.8	26.74	-238.1	0.0616	0.39103
MSMEG_5781c	pstC	phosphate ABC transporter, permease protein PstC	9	147.1	41.6	-1.82	1324.1	374.31	-949.7	0.0617	0.39129
MSMEG_2640	-	3-dehydroshikimate dehydratase	6	55.9	0	-5.83	335.4	0	-335.4	0.062	0.39171
MSMEG_4503	-	hypothetical protein MSMEG_4503	3	76.5	0	-6.28	229.5	0	-229.5	0.062	0.39171
MSMEG_4634c	-	hypothetical protein MSMEG_4634	7	121.1	3.8	-4.99	847.4	26.74	-820.7	0.062	0.39171
MSMEG_6451	-	transcriptional regulator, ArsR family protein	6	26.5	0	-4.78	158.9	0	-158.9	0.062	0.39171
MSMEG_0007	-	hypothetical protein MSMEG_0007	6	267.8	13.4	-4.32	1606.5	80.21	-1526.3	0.0621	0.39198
MSMEG_2255c	-	carboxyl transferase domain-containing protein	15	28.2	5.3	-2.4	423.7	80.21	-343.5	0.0623	0.39287
MSMEG_5057c	-	hypothetical protein MSMEG_5057	5	74.1	10.7	-2.79	370.7	53.47	-317.3	0.0624	0.39313
MSMEG_2914	-	L-idonate 5-dehydrogenase	9	27.5	3	-3.21	247.2	26.74	-220.4	0.0628	0.39528
MSMEG_0611	-	para-nitrobenzyl esterase	15	57.7	14.3	-2.02	865	213.89	-651.2	0.063	0.39617
MSMEG_5735	-	indole-3-pyruvate decarboxylase	14	148.8	45.8	-1.7	2083.2	641.68	-1441.5	0.0631	0.39631
MSMEG_0664	-	FAD dependent oxidoreductase	22	74.6	25.5	-1.55	1641.8	561.47	-1080.4	0.0632	0.39631
MSMEG_3985	-	integral membrane transport protein	25	66.4	221.4	1.74	1659.5	5534.46	3875	0.0632	0.39631
MSMEG_0436c	-	allophanate hydrolase subunit 1	6	61.8	13.4	-2.21	370.7	80.21	-290.5	0.0633	0.39657
MSMEG_3971	-	hypothetical protein MSMEG_3971	6	161.8	4.5	-5.18	971	26.74	-944.2	0.0634	0.39683
MSMEG_1954c	-	ABC1 family protein	11	78.6	19.4	-2.02	865	213.89	-651.2	0.0637	0.39796
MSMEG_4439c	-	acetyltransferase	6	85.3	0	-6.43	512	0	-512	0.0637	0.39796
MSMEG_0448	-	transcriptional regulator, MarR family protein	7	363.2	122.2	-1.57	2542.2	855.57	-1686.6	0.0638	0.39822
MSMEG_2495c	-	decarboxylase	6	182.4	31.2	-2.55	1094.5	187.16	-907.4	0.0642	0.40034
MSMEG_2973c	-	peptidyl-prolyl cis-trans isomerase	12	85.3	13.4	-2.67	1023.9	160.42	-863.5	0.0643	0.40059
MSMEG_3972	-	transcriptional regulator, LysR family protein	7	17.7	0	-4.22	123.6	0	-123.6	0.0644	0.40084
MSMEG_5475c	-	acetate operon repressor	8	207.4	50.1	-2.05	1659.5	401.05	-1258.4	0.0646	0.40172
MSMEG_3604c	-	sorbitol utilization protein SOU2	5	45.9	5.3	-3.1	229.5	26.74	-202.8	0.0648	0.40222
MSMEG_4153c	-	cytochrome P450	3	111.8	8.9	-3.65	335.4	26.74	-308.7	0.0648	0.40222
MSMEG_2119	nagA	N-acetylglucosamine-6-phosphate deacetylase	7	55.5	0	-5.82	388.4	0	-388.4	0.0651	0.40333
MSMEG_3271	-	dihydroxyacetone kinase	15	40	12.5	-1.68	600.2	187.16	-413.1	0.0651	0.40333
MSMEG_5434	-	hypothetical protein MSMEG_5434	3	82.4	8.9	-3.21	247.2	26.74	-220.4	0.0652	0.40345
MSMEG_4169c	-	3-oxoacyl-	8	77.2	6.7	-3.53	617.9	53.47	-564.4	0.0653	0.40345
MSMEG_6490c	-	major facilitator superfamily protein	14	34	252.1	2.89	476.7	3529.22	3052.6	0.0653	0.40345
MSMEG_4386	-	ABC transporter permease protein	7	100.9	0	-6.67	706.2	0	-706.2	0.0654	0.4037
MSMEG_6010	-	hypothetical protein MSMEG_6010	12	195.7	49	-2	2348	588.2	-1759.8	0.0656	0.40456
MSMEG_6193	-	anion-transporting ATPase	8	112.5	13.4	-3.07	900.4	106.95	-793.4	0.0657	0.40481
MSMEG_6313c	tgt	queuine tRNA-ribosyltransferase	17	198.3	78.6	-1.33	3371.9	1336.82	-2035.1	0.0658	0.40505
MSMEG_2887c	-	hypothetical protein MSMEG_2887	6	35.3	0	-5.18	211.8	0	-211.8	0.066	0.40591
MSMEG_3894c	-	proteasome alpha subunit	13	149.4	49.4	-1.6	1941.9	641.68	-1300.3	0.0661	0.40616
MSMEG_4047c	-	dihydropteroate synthase	12	147.1	49	-1.59	1765.4	588.2	-1177.2	0.0664	0.40763
MSMEG_3240	-	DNA-binding response regulator, LuxR family protein	5	88.3	5.3	-4.05	441.4	26.74	-414.6	0.0666	0.40848
MSMEG_5782c	pstS	phosphate ABC transporter, phosphate-binding protein PstS	12	247.2	89.1	-1.47	2965.9	1069.46	-1896.4	0.0667	0.40872
MSMEG_3688c	-	hypothetical protein MSMEG_3688	4	66.2	6.7	-3.31	264.8	26.74	-238.1	0.0671	0.4108
MSMEG_0617	EccC3	ftsk/SpoIIIE family protein	37	53	15.2	-1.8	1959.6	561.47	-1398.1	0.0674	0.41188
MSMEG_0965	-	porin	5	420.2	64.2	-2.71	2100.8	320.84	-1780	0.0674	0.41188
MSMEG_0281	-	choline dehydrogenase	20	98	33.4	-1.55	1959.6	668.41	-1291.2	0.0676	0.41235
MSMEG_5869	-	putative short chain dehydrogenase	7	95.8	3.8	-4.65	670.9	26.74	-644.1	0.0676	0.41235
MSMEG_4202c	-	hypothetical protein MSMEG_4202	7	45.4	3.8	-3.57	317.8	26.74	-291	0.0677	0.41259
MSMEG_1514c	-	hypothetical protein MSMEG_1514	11	173.3	1003.8	2.53	1906.6	11042.2	9135.5	0.068	0.41353
MSMEG_4236c	mraZ	cell division protein MraZ	7	58	3.8	-3.92	406	26.74	-379.3	0.0681	0.41353
MSMEG_5005c	-	LprC protein	3	188.3	0	-7.56	564.9	0	-564.9	0.0681	0.41353
MSMEG_5936c	-	hypothetical protein MSMEG_5936	3	400.2	26.7	-3.9	1200.5	80.21	-1120.3	0.0681	0.41353
MSMEG_4141	-	hypothetical protein MSMEG_4141	18	52	14.9	-1.81	935.7	267.36	-668.3	0.0683	0.41399
MSMEG_4428c	-	hypothetical protein MSMEG_4428	7	73.1	3.8	-4.26	512	26.74	-485.2	0.0683	0.41399
MSMEG_2626	-	hypothetical protein MSMEG_2626	6	76.5	8.9	-3.1	459	53.47	-405.5	0.0685	0.41446
MSMEG_5610	-	putative transcriptional regulator family protein	7	22.7	3.8	-2.57	158.9	26.74	-132.1	0.0685	0.41446
MSMEG_3853c	-	putative aliphatic sulfonates transport ATP-binding protein SsuB	3	58.8	0	-5.9	176.5	0	-176.5	0.0688	0.4159
MSMEG_3727c	-	hypothetical protein MSMEG_3727	5	60	10.7	-2.49	300.1	53.47	-246.6	0.0689	0.41613
MSMEG_4420	-	cupin 2, barrel	3	182.4	17.8	-3.36	547.3	53.47	-493.8	0.069	0.41636
MSMEG_0629	-	trans-aconitate 2-methyltransferase	7	32.8	0	-5.08	229.5	0	-229.5	0.0692	0.41719
MSMEG_4513c	-	polyketide synthase	7	30.3	0	-4.97	211.8	0	-211.8	0.0693	0.41742
MSMEG_1806	-	hypothetical protein MSMEG_1806	5	98.9	5.3	-4.21	494.3	26.74	-467.6	0.0696	0.41847
MSMEG_2499c	-	ABC transporter, membrane spanning protein, putative	8	13.2	0	-3.83	105.9	0	-105.9	0.0696	0.41847
MSMEG_5446	pabB	para-aminobenzoate synthase component I	9	76.5	8.9	-3.1	688.5	80.21	-608.3	0.0697	0.4187
MSMEG_2853	-	hypothetical protein MSMEG_2853	7	32.8	0	-5.08	229.5	0	-229.5	0.0707	0.42395
MSMEG_5142c	-	beta-glucosidase A	26	53	213.9	2.01	1377	5561.19	4184.2	0.0707	0.42395
MSMEG_0711	dnaJ	chaperone protein DnaJ	9	62.8	5.9	-3.4	564.9	53.47	-511.5	0.0708	0.42417
MSMEG_2633c	-	ABC transporter ATP-binding protein	7	93.3	7.6	-3.61	653.2	53.47	-599.7	0.0709	0.42439
MSMEG_2247	-	dihydrokaempferol 4-reductase	10	90	13.4	-2.75	900.4	133.68	-766.7	0.0711	0.42521
MSMEG_2455c	-	carbon monoxide dehydrogenase subunit G (CoxG) superfamily protein	7	83.2	0	-6.4	582.6	0	-582.6	0.0715	0.42684
MSMEG_3350	-	TRAP transporter, DctM-like membrane protein	14	35.3	3.8	-3.21	494.3	53.47	-440.8	0.0715	0.42684
MSMEG_1061c	-	phosphohydrolase	8	167.7	755.3	2.17	1341.7	6042.45	4700.7	0.0717	0.42727
MSMEG_2989	-	LacI family protein transcriptional regulator	7	65.6	3.8	-4.1	459	26.74	-432.3	0.0717	0.42727
MSMEG_6228	-	hypothetical protein MSMEG_6228	5	162.4	10.7	-3.92	812.1	53.47	-758.6	0.0718	0.42749
MSMEG_0896	-	integral membrane transport protein	18	220.7	609	1.46	3972.2	10962	6989.8	0.0719	0.42771
MSMEG_1460	-	pyridine nucleotide-disulphide oxidoreductase	7	42.9	3.8	-3.49	300.1	26.74	-273.4	0.0721	0.42852
MSMEG_1303c	-	putative transcriptional regulator	7	103.4	26.7	-1.95	723.8	187.16	-536.7	0.0722	0.42873
MSMEG_2980c	-	hypothetical protein MSMEG_2980	14	22.7	3.8	-2.57	317.8	53.47	-264.3	0.0728	0.43157
MSMEG_2884	-	cyclohexanone monooxygenase	25	77	27.8	-1.47	1924.3	695.15	-1229.1	0.0729	0.43157
MSMEG_1640	-	ATP/GTP-binding protein	5	116.5	5.3	-4.45	582.6	26.74	-555.8	0.073	0.43157
MSMEG_1708c	-	ribose operon repressor, putative	7	20.2	0	-4.4	141.2	0	-141.2	0.073	0.43157
MSMEG_2309	-	transcriptional regulatory protein	5	300.1	679.1	1.18	1500.6	3395.54	1894.9	0.073	0.43157
MSMEG_0737	-	dehydrogenase	6	188.3	22.3	-3.08	1129.9	133.68	-996.2	0.0732	0.432
MSMEG_5383c	-	dehydrogenase/reductase SDR family protein member 4	6	94.2	8.9	-3.4	564.9	53.47	-511.5	0.0732	0.432
MSMEG_0580	-	hypothetical protein MSMEG_0580	8	79.4	6.7	-3.57	635.5	53.47	-582.1	0.0733	0.43221
MSMEG_6237	-	hypothetical protein MSMEG_6237	7	53	3.8	-3.79	370.7	26.74	-344	0.0735	0.43301
MSMEG_4075	-	CoA-binding protein	20	57.4	25.4	-1.18	1147.5	507.99	-639.5	0.074	0.43557
MSMEG_3441c	-	hypothetical protein MSMEG_3441	7	128.6	19.1	-2.75	900.4	133.68	-766.7	0.0742	0.43636
MSMEG_2584	-	penicillin-binding protein, putative	14	13.9	0	-3.89	194.2	0	-194.2	0.0747	0.43892
MSMEG_1676	add	adenosine deaminase	9	186.3	44.6	-2.06	1677.1	401.05	-1276.1	0.0748	0.43912
MSMEG_0616	EccB3	hypothetical protein MSMEG_0616	12	69.1	15.6	-2.15	829.7	187.16	-642.6	0.0749	0.43933
MSMEG_5170c	-	pyridoxamine 5'-phosphate oxidase family protein	4	83.9	20.1	-2.06	335.4	80.21	-255.2	0.075	0.43953
MSMEG_6232c	katA	catalase KatA	19	171	481.3	1.49	3248.3	9143.88	5895.5	0.0752	0.44032
MSMEG_1410	fabG	3-ketoacyl-(acyl-carrier-protein) reductase	10	63.6	10.7	-2.57	635.5	106.95	-528.6	0.0753	0.44052
MSMEG_4082c	-	monoxygenase	28	83.9	243.5	1.54	2348	6817.81	4469.8	0.0755	0.4413
MSMEG_1403	-	cutinase superfamily protein	8	200.8	768.7	1.94	1606.5	6149.39	4542.9	0.0756	0.44132
MSMEG_3825	-	3-oxoacyl-	7	272.4	64.9	-2.07	1906.6	454.52	-1452.1	0.0757	0.44132
MSMEG_4621c	proB	gamma-glutamyl kinase	8	15.4	0	-4.04	123.6	0	-123.6	0.0757	0.44132
MSMEG_6140	-	membrane protein	8	55.2	0	-5.81	441.4	0	-441.4	0.076	0.44269
MSMEG_0781	-	amino acid permease	22	127.6	46.2	-1.47	2807	1015.99	-1791	0.0763	0.44328
MSMEG_1485	map	methionine aminopeptidase	8	381.8	1129.6	1.57	3054.1	9036.94	5982.8	0.0763	0.44328
MSMEG_6594c	-	amino acid ABC transporter, permease protein, 3-TM region, His/Glu/Gln/Arg/opine	8	203	86.9	-1.22	1624.2	695.15	-929	0.0763	0.44328
MSMEG_0425c	-	putative membrane protein DcsA	8	39.7	0	-5.35	317.8	0	-317.8	0.0765	0.44367
MSMEG_5080	-	glycogen synthase	14	209.3	84	-1.32	2930.6	1176.41	-1754.2	0.0765	0.44367
MSMEG_2921	-	NADPH-flavin oxidoreductase	8	39.7	0	-5.35	317.8	0	-317.8	0.0768	0.44465
MSMEG_4649	-	phytanoyl-CoA dioxygenase	14	65.6	22.9	-1.52	918	320.84	-597.2	0.0768	0.44465
MSMEG_6686	-	glutaryl-CoA dehydrogenase	10	68.9	18.7	-1.88	688.5	187.16	-501.4	0.0769	0.44484
MSMEG_1626c	-	putative DNA-binding protein	8	86.1	3.3	-4.69	688.5	26.74	-661.8	0.0771	0.44561
MSMEG_2697c	-	hypothetical protein MSMEG_2697	6	294.2	115.9	-1.34	1765.4	695.15	-1070.3	0.0774	0.44677
MSMEG_0138	-	virulence factor Mce family protein	7	113.5	15.3	-2.89	794.4	106.95	-687.5	0.0775	0.44677
MSMEG_1983c	-	major facilitator family protein transporter	12	69.1	13.4	-2.37	829.7	160.42	-669.3	0.0775	0.44677
MSMEG_4204	-	catalase	17	93.5	33	-1.5	1588.9	561.47	-1027.4	0.0777	0.44754
MSMEG_2233	-	acyl-CoA dehydrogenase domain-containing protein	9	15.7	0	-4.06	141.2	0	-141.2	0.0779	0.44773
MSMEG_6713c	-	hydroxyquinol 1,2-dioxygenase	8	26.5	3.3	-2.99	211.8	26.74	-185.1	0.0779	0.44773
MSMEG_1924c	-	N-acetyltransferase Ats1	5	53	5.3	-3.31	264.8	26.74	-238.1	0.078	0.44773
MSMEG_2304	-	hypothetical protein MSMEG_2304	5	113	26.7	-2.08	564.9	133.68	-431.2	0.078	0.44773
MSMEG_5339	-	nitrile hydratase regulator1	16	124.7	40.1	-1.64	1994.9	641.68	-1353.2	0.0781	0.44792
MSMEG_1737	-	RNA pseudouridine synthase family protein	9	317.8	106.9	-1.57	2860	962.51	-1897.4	0.0782	0.44812
MSMEG_4363c	-	hypothetical protein MSMEG_4363	8	64	13.4	-2.26	512	106.95	-405	0.0786	0.45002
MSMEG_5631	-	AMP-dependent synthetase and ligase	11	16	4.9	-1.72	176.5	53.47	-123.1	0.0789	0.45097
MSMEG_5728	-	polysaccharide deacetylase family protein	14	39.1	15.3	-1.36	547.3	213.89	-333.4	0.0789	0.45097
MSMEG_0638	-	hypothetical protein MSMEG_0638	21	69.8	17.8	-1.97	1465.3	374.31	-1091	0.079	0.45116
MSMEG_4586c	-	ABC nitrate/sulfonate/bicarbonate family protein transporter, periplasmic ligand binding protein	13	97.8	28.8	-1.76	1271.1	374.31	-896.8	0.0791	0.45135
MSMEG_0709	dnaK	molecular chaperone DnaK	14	8.8	0	-3.3	123.6	0	-123.6	0.0793	0.4521
MSMEG_2327	-	nudix hydrolase	6	256	93.6	-1.45	1535.9	561.47	-974.4	0.0795	0.45286
MSMEG_1683c	-	cytosine/purine/uracil/thiamine/allantoin permease family protein	20	146.5	61.5	-1.25	2930.6	1229.88	-1700.7	0.0796	0.45305
MSMEG_5554c	-	ANTAR domain-containing protein	11	110.7	38.9	-1.51	1218.1	427.78	-790.3	0.0797	0.45323
MSMEG_0093	-	methyltransferase	13	308.3	131.6	-1.23	4007.5	1711.14	-2296.3	0.0802	0.45569
MSMEG_4773c	-	amidohydrolase family protein	17	251.3	106.9	-1.23	4272.3	1818.08	-2454.2	0.0804	0.45644
MSMEG_1102	-	twin-arginine translocation pathway signal	14	146.3	42	-1.8	2047.9	588.2	-1459.7	0.0806	0.45719
MSMEG_6467c	-	starvation-induced DNA protecting protein	4	384	33.4	-3.52	1535.9	133.68	-1402.2	0.0809	0.45829
MSMEG_1411c	-	universal stress protein family protein	9	94.2	8.9	-3.4	847.4	80.21	-767.2	0.081	0.45829
MSMEG_4850c	-	short-chain dehydrogenase/reductase SDR	10	58.3	0	-5.89	582.6	0	-582.6	0.081	0.45829
MSMEG_1146	-	virulence factor Mce family protein	9	47.1	3	-3.99	423.7	26.74	-397	0.0811	0.45847
MSMEG_3551	-	linalool 8-monooxygenase	8	77.2	3.3	-4.53	617.9	26.74	-591.2	0.0815	0.46035
MSMEG_3846c	-	phosphotransferase enzyme family protein	22	57.8	25.5	-1.18	1271.1	561.47	-709.6	0.0817	0.46088
MSMEG_2592	-	hypothetical protein MSMEG_2592	4	83.9	13.4	-2.65	335.4	53.47	-282	0.0818	0.46088
MSMEG_3748c	-	thiamin pyrophosphokinase catalytic subunit	9	31.4	0	-5.02	282.5	0	-282.5	0.0818	0.46088
MSMEG_2350c	-	hypothetical protein MSMEG_2350	9	39.2	0	-5.33	353.1	0	-353.1	0.082	0.46162
MSMEG_2344c	-	dehydrogenase	15	104.7	28.5	-1.88	1571.2	427.78	-1143.4	0.0827	0.46517
MSMEG_0152c	-	alanine dehydrogenase/pyridine nucleotide transhydrogenase	10	26.5	0	-4.78	264.8	0	-264.8	0.0829	0.4659
MSMEG_0556	-	ABC transporter, nucleotide binding/ATPase protein	6	179.5	31.2	-2.52	1076.9	187.16	-889.7	0.0832	0.4672
MSMEG_1182	hutI	imidazolonepropionase	10	8.8	0	-3.3	88.3	0	-88.3	0.0835	0.46849
MSMEG_5222c	ychF	translation-associated GTPase	4	454.6	140.4	-1.7	1818.4	561.47	-1256.9	0.0836	0.46866
MSMEG_3847c	tynA	tyramine oxidase	29	74.9	249.8	1.74	2171.4	7245.59	5074.1	0.084	0.47051
MSMEG_4944c	-	hypothetical protein MSMEG_4944	12	345.7	135.9	-1.35	4148.7	1630.93	-2517.8	0.0844	0.47197
MSMEG_6709	-	cyclopentanol dehydrogenase	9	41.2	0	-5.4	370.7	0	-370.7	0.0844	0.47197
MSMEG_4860c	-	hydrolase, alpha/beta fold family protein, putative	10	49.4	10.7	-2.21	494.3	106.95	-387.4	0.0849	0.47414
MSMEG_0284c	-	ribosyldihydronicotinamide dehydrogenase (quinone)	13	28.5	4.1	-2.79	370.7	53.47	-317.3	0.085	0.47414
MSMEG_5634c	-	hypothetical protein MSMEG_5634	4	203	13.4	-3.92	812.1	53.47	-758.6	0.085	0.47414
MSMEG_5306	-	two-component system response regulator	9	105.9	23.8	-2.16	953.3	213.89	-739.4	0.0852	0.47423
MSMEG_0390	-	putative acyltransferase	29	154.6	79.3	-0.96	4484.1	2299.34	-2184.8	0.0853	0.47423
MSMEG_1599	-	RNA polymerase sigma factor SigD	5	109.5	10.7	-3.36	547.3	53.47	-493.8	0.0853	0.47423
MSMEG_5759c	-	PE family protein	10	291.3	115	-1.34	2912.9	1149.67	-1763.2	0.0853	0.47423
MSMEG_1880c	-	hypothetical protein MSMEG_1880	6	88.3	8.9	-3.31	529.6	53.47	-476.1	0.0856	0.47551
MSMEG_1430	-	transcriptional regulator, TetR family protein	5	60	5.3	-3.49	300.1	26.74	-273.4	0.0857	0.47567
MSMEG_3620	-	hypothetical protein MSMEG_3620	10	157.1	50.8	-1.63	1571.2	507.99	-1063.2	0.0859	0.47639
MSMEG_4502c	-	hypothetical protein MSMEG_4502	4	97.1	13.4	-2.86	388.4	53.47	-334.9	0.086	0.47655
MSMEG_6346	-	hypothetical protein MSMEG_6346	4	167.7	33.4	-2.33	670.9	133.68	-537.2	0.0861	0.47671
MSMEG_3386c	-	shikimate transporter	18	67.7	23.8	-1.51	1218.1	427.78	-790.3	0.0863	0.47742
MSMEG_5767c	-	hypothetical protein MSMEG_5767	15	142.4	42.8	-1.74	2136.1	641.68	-1494.5	0.0865	0.47813
MSMEG_0511	-	putative sugar isomerase, AgaS family protein	11	62.6	14.6	-2.1	688.5	160.42	-528.1	0.0867	0.47885
MSMEG_2975	-	metallo-beta-lactamase family protein	7	224.5	57.3	-1.97	1571.2	401.05	-1170.2	0.0871	0.48066
MSMEG_5004c	-	DNA repair exonuclease	8	79.4	33.4	-1.25	635.5	267.36	-368.2	0.0877	0.48318
MSMEG_5762	-	zinc-binding oxidoreductase	10	26.5	0	-4.78	264.8	0	-264.8	0.0877	0.48318
MSMEG_0220	-	monoglyceride lipase	12	117.7	40.1	-1.55	1412.3	481.26	-931.1	0.0879	0.48388
MSMEG_0658c	-	polyamine ABC-transporter, inner membrane subunit	10	24.7	0	-4.68	247.2	0	-247.2	0.088	0.48404
MSMEG_0719c	-	flavohemoprotein	13	179.3	55.5	-1.69	2330.3	721.89	-1608.4	0.0884	0.48544
MSMEG_5118	-	nudix hydrolase	7	58	7.6	-2.92	406	53.47	-352.6	0.0884	0.48544
MSMEG_0605c	-	hypothetical protein MSMEG_0605	11	40.1	0	-5.36	441.4	0	-441.4	0.0885	0.4855
MSMEG_0606c	-	transcriptional regulator, TetR family protein	13	72	22.6	-1.67	935.7	294.1	-641.6	0.0886	0.4855
MSMEG_3206	hisC	histidinol-phosphate aminotransferase	12	30.9	8.9	-1.79	370.7	106.95	-263.8	0.0887	0.4855
MSMEG_4851c	-	caib/baif family protein	18	73.6	26.7	-1.46	1324.1	481.26	-842.8	0.0887	0.4855
MSMEG_0376	-	transcriptional regulator, AraC family protein	10	24.7	0	-4.68	247.2	0	-247.2	0.0889	0.4862
MSMEG_2106c	-	putative transcriptional regulator	11	46.5	2.4	-4.26	512	26.74	-485.2	0.0895	0.48908
MSMEG_1677c	aspA	aspartate ammonia-lyase	16	130.2	40.1	-1.7	2083.2	641.68	-1441.5	0.0899	0.48967
MSMEG_3673	malQ	4-alpha-glucanotransferase	25	117.2	420.3	1.84	2930.6	10507.4	7576.9	0.0899	0.48967
MSMEG_6333c	-	amino acid ABC transporter, ATP-binding protein	10	17.7	0	-4.22	176.5	0	-176.5	0.0899	0.48967
MSMEG_6526	-	pyridoxamine 5'-phosphate oxidase family protein	5	81.2	5.3	-3.92	406	26.74	-379.3	0.0899	0.48967
MSMEG_2665	-	hypothetical protein MSMEG_2665	5	169.5	5.3	-4.99	847.4	26.74	-820.7	0.0901	0.49037
MSMEG_2612c	-	hypothetical protein MSMEG_2612	15	176.5	540.1	1.61	2648.1	8101.16	5453.1	0.0908	0.49378
MSMEG_4244c	-	3-deoxy-7-phosphoheptulonate synthase	12	147.1	53.5	-1.46	1765.4	641.68	-1123.7	0.0912	0.49555
MSMEG_5491	-	putative acyl-CoA dehydrogenase	13	229.5	67.9	-1.76	2983.5	882.3	-2101.2	0.0914	0.49583
MSMEG_6775	-	major facilitator superfamily protein transporter	17	96.6	44	-1.13	1641.8	748.62	-893.2	0.0914	0.49583
MSMEG_3590	-	hypothetical protein MSMEG_3590	7	181.6	45.8	-1.99	1271.1	320.84	-950.3	0.0918	0.4976
MSMEG_6422	-	ferritin family protein	3	435.5	35.6	-3.61	1306.4	106.95	-1199.5	0.0921	0.49883
MSMEG_0652	-	hypothetical protein MSMEG_0652	5	116.5	5.3	-4.45	582.6	26.74	-555.8	0.0925	0.50019
MSMEG_2934	-	lipid A biosynthesis lauroyl acyltransferase	10	19.4	2.7	-2.86	194.2	26.74	-167.5	0.0925	0.50019
MSMEG_5692c	-	hypothetical protein MSMEG_5692	6	476.7	115.9	-2.04	2860	695.15	-2164.8	0.093	0.50181
MSMEG_3967c	-	TonB-dependent receptor	6	120.6	4.5	-4.76	723.8	26.74	-697.1	0.0931	0.50181
MSMEG_4366c	-	serine/threonine-protein kinase PknD	22	163.7	59.5	-1.46	3601.4	1310.09	-2291.3	0.0931	0.50181
MSMEG_6598	-	riboflavin synthase subunit beta	4	353.1	0	-8.47	1412.3	0	-1412.3	0.0931	0.50181
MSMEG_5211	-	hypothetical protein MSMEG_5211	29	34.7	12.9	-1.43	1006.3	374.31	-632	0.0935	0.50357
MSMEG_0050	-	hypothetical protein MSMEG_0050	3	105.9	0	-6.74	317.8	0	-317.8	0.0936	0.5037
MSMEG_0601c	-	hypothetical protein MSMEG_0601	3	441.4	26.7	-4.05	1324.1	80.21	-1243.8	0.0937	0.50383
MSMEG_3569c	-	hypothetical protein MSMEG_3569	7	113.5	15.3	-2.89	794.4	106.95	-687.5	0.094	0.50464
MSMEG_4314	-	hypothetical protein MSMEG_4314	5	190.7	37.4	-2.35	953.3	187.16	-766.2	0.094	0.50464
MSMEG_3787	-	D-aminoacylase	21	74.8	31.8	-1.23	1571.2	668.41	-902.8	0.0944	0.50598
MSMEG_5210c	-	hydrolase	7	166.5	22.9	-2.86	1165.2	160.42	-1004.7	0.0944	0.50598
MSMEG_3280c	-	polyamine-binding lipoprotein	19	150.5	56.3	-1.42	2860	1069.46	-1790.5	0.0948	0.50677
MSMEG_4178	-	flavodoxin/nitric oxide synthase	3	282.5	35.6	-2.99	847.4	106.95	-740.4	0.0949	0.50677
MSMEG_1724c	-	hypothetical protein MSMEG_1724	6	176.5	13.4	-3.72	1059.2	80.21	-979	0.095	0.50677
MSMEG_4591c	-	hypothetical protein MSMEG_4591	3	35.3	0	-5.18	105.9	0	-105.9	0.095	0.50677
MSMEG_5699	-	ThiS family protein	5	317.8	21.4	-3.89	1588.9	106.95	-1481.9	0.095	0.50677
MSMEG_6132c	-	glucarate dehydratase	10	134.2	32.1	-2.06	1341.7	320.84	-1020.9	0.095	0.50677
MSMEG_2604	pcaC	4-carboxymuconolactone decarboxylase	3	53	0	-5.75	158.9	0	-158.9	0.0951	0.5069
MSMEG_4008	-	oxidoreductase, 2OG-Fe(II) oxygenase family protein	17	57.1	17.3	-1.72	971	294.1	-676.9	0.0956	0.50874
MSMEG_6357c	-	hypothetical protein MSMEG_6357	3	123.6	0	-6.96	370.7	0	-370.7	0.0956	0.50874
MSMEG_0144c	-	HNH endonuclease	17	72.7	23.6	-1.62	1235.8	401.05	-834.7	0.0958	0.50874
MSMEG_4010	-	glyoxalase family protein	7	40.4	7.6	-2.4	282.5	53.47	-229	0.0958	0.50874
MSMEG_0159	-	formate dehydrogenase, gamma subunit	3	58.8	0	-5.9	176.5	0	-176.5	0.0959	0.50874
MSMEG_0872c	-	twin-arginine translocation pathway signal	3	70.6	0	-6.16	211.8	0	-211.8	0.0959	0.50874
MSMEG_1386	-	hypothetical protein MSMEG_1386	10	270.1	77.5	-1.8	2701.1	775.36	-1925.7	0.0962	0.50936
MSMEG_4985c	-	carbonic anhydrase	3	88.3	8.9	-3.31	264.8	26.74	-238.1	0.0963	0.50936
MSMEG_4113c	-	acyl-CoA dehydrogenase	8	61.8	6.7	-3.21	494.3	53.47	-440.8	0.0965	0.50936
MSMEG_0253	-	hypothetical protein MSMEG_0253	3	153	0	-7.27	459	0	-459	0.0966	0.50936
MSMEG_4215	-	phosphoribosyltransferase	3	58.8	8.9	-2.72	176.5	26.74	-149.8	0.0966	0.50936
MSMEG_0538c	-	regulatory protein, MarR	3	158.9	0	-7.32	476.7	0	-476.7	0.0967	0.50936
MSMEG_1481c	-	methyltransferase	9	82.4	23.8	-1.79	741.5	213.89	-527.6	0.0967	0.50936
MSMEG_2744c	-	thymidylate synthase	9	206	656.5	1.67	1853.7	5908.77	4055.1	0.0967	0.50936
MSMEG_5580	-	Ku protein	12	176.5	78	-1.18	2118.5	935.78	-1182.7	0.0967	0.50936
MSMEG_0822c	-	cytochrome P450	10	68.9	10.7	-2.69	688.5	106.95	-581.6	0.0969	0.5096
MSMEG_2064c	-	two-component system response regulator	3	111.8	0	-6.82	335.4	0	-335.4	0.0969	0.5096
MSMEG_0579c	-	helix-turn-helix, Fis-type	6	82.4	4.5	-4.21	494.3	26.74	-467.6	0.097	0.5096
MSMEG_2170	-	3-hydroxyisobutyrate dehydrogenase family protein	12	30.9	4.5	-2.79	370.7	53.47	-317.3	0.0971	0.5096
MSMEG_2264	-	peptidase M52, hydrogen uptake protein	6	126.5	26.7	-2.24	759.1	160.42	-598.7	0.0972	0.5096
MSMEG_5948c	-	glycosyl transferase	14	208.1	70.7	-1.56	2912.9	989.25	-1923.7	0.0972	0.5096
MSMEG_2318c	-	GTP cyclohydrolase II	3	129.5	8.9	-3.86	388.4	26.74	-361.7	0.0973	0.50972
MSMEG_1792c	-	hypothetical protein MSMEG_1792	3	276.6	17.8	-3.96	829.7	53.47	-776.3	0.0974	0.50985
MSMEG_5350c	-	PPE family protein, putative	18	80.4	23.8	-1.76	1447.6	427.78	-1019.8	0.0975	0.50998
MSMEG_4449c	-	putative transcriptional regulator	7	244.6	84	-1.54	1712.4	588.2	-1124.2	0.0979	0.51167
MSMEG_5332c	-	transcriptional regulator, TetR family protein	11	117.2	566.3	2.27	1288.7	6229.6	4940.9	0.0981	0.51189
MSMEG_1038c	-	GTP cyclohydrolase II	3	94.2	0	-6.57	282.5	0	-282.5	0.0983	0.51189
MSMEG_4970	-	hypothetical protein MSMEG_4970	3	82.4	8.9	-3.21	247.2	26.74	-220.4	0.0983	0.51189
MSMEG_6040	-	hypothetical protein MSMEG_6040	3	388.4	71.3	-2.45	1165.2	213.89	-951.3	0.0983	0.51189
MSMEG_1262	-	hypothetical protein MSMEG_1262	3	182.4	26.7	-2.77	547.3	80.21	-467.1	0.0984	0.51189
MSMEG_2641c	-	enoyl-CoA hydratase	3	176.5	0	-7.47	529.6	0	-529.6	0.0984	0.51189
MSMEG_6200c	-	hypothetical protein MSMEG_6200	3	417.8	17.8	-4.55	1253.4	53.47	-1200	0.0988	0.51318
MSMEG_6603c	-	NADH:flavin oxidoreductase/NADH oxidase	3	194.2	0	-7.61	582.6	0	-582.6	0.0988	0.51318
MSMEG_4888c	-	ligand-binding /sugar binding domain-containing protein	10	49.4	5.3	-3.21	494.3	53.47	-440.8	0.0989	0.5133
MSMEG_5691c	-	hypothetical protein MSMEG_5691	7	191.7	42	-2.19	1341.7	294.1	-1047.6	0.099	0.51339
MSMEG_6597	-	hydrolase of the alpha/beta superfamily protein	3	423.7	44.6	-3.25	1271.1	133.68	-1137.4	0.0992	0.51339
MSMEG_5115	-	hypothetical protein MSMEG_5115	3	53	8.9	-2.57	158.9	26.74	-132.1	0.0993	0.51339
MSMEG_5176c	-	methyltransferase type 11	3	88.3	8.9	-3.31	264.8	26.74	-238.1	0.0993	0.51339
MSMEG_5645c	-	hypothetical protein MSMEG_5645	5	127.1	10.7	-3.57	635.5	53.47	-582.1	0.0993	0.51339
MSMEG_6268	-	putative ScnB protein	3	35.3	0	-5.18	105.9	0	-105.9	0.0996	0.51346
MSMEG_6556	-	putative transcriptional regulator	3	158.9	8.9	-4.16	476.7	26.74	-449.9	0.0996	0.51346
MSMEG_2061c	-	NADH dehydrogenase subunit C	16	65.1	23.4	-1.48	1041.6	374.31	-667.3	0.0997	0.51346
MSMEG_3650c	-	integral membrane protein	3	88.3	17.8	-2.31	264.8	53.47	-211.3	0.0997	0.51346
MSMEG_0595c	-	glycolate oxidase	9	204	68.3	-1.58	1836	614.94	-1221.1	0.0998	0.51346
MSMEG_5162c	-	cinnamoyl ester hydrolase	3	200.1	0	-7.65	600.2	0	-600.2	0.0999	0.51346
MSMEG_2174	-	superfamily protein I DNA or RNA helicase	22	150.9	54.7	-1.46	3319	1203.14	-2115.8	0.1	0.51346
MSMEG_4337c	-	beta-lactamase	3	129.5	17.8	-2.86	388.4	53.47	-334.9	0.1	0.51346
MSMEG_4903c	murI	glutamate racemase	6	32.4	4.5	-2.86	194.2	26.74	-167.5	0.1	0.51346
MSMEG_5444	-	RNA polymerase sigma-70 factor protein	10	91.8	26.7	-1.78	918	267.36	-650.6	0.1001	0.51355
MSMEG_0186c	-	MmpS2 protein	3	311.9	17.8	-4.13	935.7	53.47	-882.2	0.1003	0.51355
MSMEG_4399	-	hypothetical protein MSMEG_4399	3	105.9	8.9	-3.57	317.8	26.74	-291	0.1003	0.51355
MSMEG_1375c	-	tagatose-1,6-bisphosphate aldolase GatY	3	53	0	-5.75	158.9	0	-158.9	0.1004	0.51355
MSMEG_2729	miaB	tRNA-I(6)A37 thiotransferase enzyme MiaB	11	75.4	14.6	-2.37	829.7	160.42	-669.3	0.1004	0.51355
MSMEG_3988c	-	transcriptional regulator, AsnC family protein	7	98.4	19.1	-2.36	688.5	133.68	-554.8	0.1006	0.51376
MSMEG_5428	arsC	arsenate reductase	3	94.2	0	-6.57	282.5	0	-282.5	0.1007	0.51376
MSMEG_3809	-	hypothetical protein MSMEG_3809	7	191.7	80.2	-1.26	1341.7	561.47	-780.2	0.1008	0.51376
MSMEG_6253c	-	fur family protein transcriptional regulator	3	223.6	0	-7.81	670.9	0	-670.9	0.1008	0.51376
MSMEG_0454	-	GntR-family protein transcriptional regulator	3	147.1	8.9	-4.05	441.4	26.74	-414.6	0.1009	0.51376
MSMEG_5924	-	hypothetical protein MSMEG_5924	3	200.1	8.9	-4.49	600.2	26.74	-573.5	0.1009	0.51376
MSMEG_0366	-	hypothetical protein MSMEG_0366	4	123.6	0	-6.96	494.3	0	-494.3	0.1012	0.51396
MSMEG_0549c	-	ABC transporter, permease protein	3	53	0	-5.75	158.9	0	-158.9	0.1012	0.51396
MSMEG_0246	-	sensor-type histidine kinase PrrB	3	82.4	0	-6.38	247.2	0	-247.2	0.1013	0.51396
MSMEG_2084	-	hypothetical protein MSMEG_2084	3	229.5	8.9	-4.69	688.5	26.74	-661.8	0.1013	0.51396
MSMEG_2486	-	major facilitator superfamily protein	20	102.4	42.8	-1.26	2047.9	855.57	-1192.3	0.1014	0.51396
MSMEG_5701c	moaE	molybdopterin converting factor, subunit 2	3	94.2	0	-6.57	282.5	0	-282.5	0.1014	0.51396
MSMEG_4899c	rdgB	non-canonical purine NTP pyrophosphatase, RdgB/HAM1 family protein	3	41.2	0	-5.4	123.6	0	-123.6	0.1016	0.51432
MSMEG_2154	-	hypothetical protein MSMEG_2154	10	65.3	24.1	-1.44	653.2	240.63	-412.6	0.1017	0.51432
MSMEG_6214c	-	GatB/Yqey domain-containing protein	3	311.9	8.9	-5.13	935.7	26.74	-908.9	0.1017	0.51432
MSMEG_0656c	-	transcriptional regulator, TetR family protein	3	47.1	0	-5.59	141.2	0	-141.2	0.102	0.51441
MSMEG_3385c	-	hypothetical protein MSMEG_3385	7	30.3	3.8	-2.99	211.8	26.74	-185.1	0.102	0.51441
MSMEG_3882c	-	glyoxalase family protein	3	194.2	53.5	-1.86	582.6	160.42	-422.2	0.102	0.51441
MSMEG_4488c	-	hydrolase, nudix family protein	3	247.2	17.8	-3.79	741.5	53.47	-688	0.1021	0.51441
MSMEG_5154c	-	hypothetical protein MSMEG_5154	3	135.3	17.8	-2.92	406	53.47	-352.6	0.1021	0.51441
MSMEG_1668	-	pyridoxamine 5'-phosphate oxidase family protein	3	441.4	26.7	-4.05	1324.1	80.21	-1243.8	0.1022	0.51452
MSMEG_3910	-	hypothetical protein MSMEG_3910	3	135.3	0	-7.09	406	0	-406	0.1023	0.51464
MSMEG_3944	-	two component transcriptional regulatory protein devr	3	123.6	0	-6.96	370.7	0	-370.7	0.1032	0.51878
MSMEG_0209	-	ribonuclease inhibitor	3	241.3	0	-7.92	723.8	0	-723.8	0.1035	0.51951
MSMEG_6108	-	zinc-binding dehydrogenase	9	113.8	8.9	-3.67	1023.9	80.21	-943.7	0.1035	0.51951
MSMEG_3699	-	hypothetical protein MSMEG_3699	3	105.9	0	-6.74	317.8	0	-317.8	0.1038	0.52063
MSMEG_2353	-	secreted protein	3	276.6	8.9	-4.96	829.7	26.74	-803	0.104	0.52124
MSMEG_1069	-	amino acid permease-associated region	12	225.1	795.4	1.82	2701.1	9544.93	6843.9	0.1045	0.52269
MSMEG_2342	-	putative glycosyltransferase	10	38.8	2.7	-3.86	388.4	26.74	-361.7	0.1045	0.52269
MSMEG_2544	-	transcriptional regulator, LysR family protein	3	94.2	0	-6.57	282.5	0	-282.5	0.1046	0.52269
MSMEG_2557c	-	transcriptional regulator, TetR family protein	7	53	3.8	-3.79	370.7	26.74	-344	0.1046	0.52269
MSMEG_3264c	-	transcriptional regulator	13	34	6.2	-2.46	441.4	80.21	-361.1	0.1048	0.5233
MSMEG_2476c	-	MarR family protein transcriptional regulatory protein	3	82.4	0	-6.38	247.2	0	-247.2	0.105	0.52352
MSMEG_3828	-	glutamine synthetase	18	66.7	20.8	-1.68	1200.5	374.31	-826.2	0.105	0.52352
MSMEG_0445	-	amidohydrolase family protein	19	75.3	29.6	-1.35	1430	561.47	-868.5	0.1054	0.52512
MSMEG_1171c	-	low molecular weight phosphotyrosine protein phosphatase	6	32.4	4.5	-2.86	194.2	26.74	-167.5	0.1055	0.52523
MSMEG_2229	-	enoyl-CoA hydratase	6	47.1	4.5	-3.4	282.5	26.74	-255.7	0.1063	0.52843
MSMEG_6809	cbbQ	CbbQ protein	6	76.5	4.5	-4.1	459	26.74	-432.3	0.1063	0.52843
MSMEG_5059c	-	ABC transporter, permease protein SugB	6	126.5	44.6	-1.51	759.1	267.36	-491.8	0.1064	0.52854
MSMEG_2294c	dinB	DNA polymerase IV	5	222.4	925.1	2.06	1112.2	4625.41	3513.2	0.1065	0.52864
MSMEG_5487c	-	sensor histidine kinase	10	243.6	74.9	-1.7	2436.3	748.62	-1687.6	0.1066	0.52875
MSMEG_1423	-	radical SAM domain-containing protein	7	63.1	15.3	-2.05	441.4	106.95	-334.4	0.1069	0.52985
MSMEG_4920c	-	acetyl-CoA acetyltransferase	14	92.1	347.6	1.92	1288.7	4866.04	3577.3	0.107	0.52995
MSMEG_3442	-	cyclohexadienyl dehydratase	8	154.5	46.8	-1.72	1235.8	374.31	-861.5	0.1072	0.53055
MSMEG_1301	-	NanT3	3	229.5	0	-7.85	688.5	0	-688.5	0.1082	0.53491
MSMEG_0589	rhaI	L-rhamnose isomerase	13	85.6	28.8	-1.57	1112.2	374.31	-737.9	0.1084	0.53491
MSMEG_2072c	-	3-hydroxy-3-methylglutaryl-CoA lyase	6	32.4	4.5	-2.86	194.2	26.74	-167.5	0.1084	0.53491
MSMEG_4484	-	putative transmembrane protein	10	116.5	45.5	-1.36	1165.2	454.52	-710.6	0.1084	0.53491
MSMEG_6012c	-	putative acyl-CoA dehydrogenase	12	138.3	46.8	-1.56	1659.5	561.47	-1098	0.1086	0.5355
MSMEG_4872	-	short chain dehydrogenase	4	57.4	6.7	-3.1	229.5	26.74	-202.8	0.1087	0.5356
MSMEG_4523	-	binding-protein-dependent transport systems inner membrane component	5	24.7	0	-4.68	123.6	0	-123.6	0.1092	0.53767
MSMEG_5863	-	cytochrome P450 51	12	75	20.1	-1.9	900.4	240.63	-659.7	0.1097	0.53974
MSMEG_6151	-	alpha/beta hydrolase fold-1	19	288	108.4	-1.41	5472.7	2058.71	-3414	0.1098	0.53984
MSMEG_6620c	-	hypothetical protein MSMEG_6620	5	49.4	0	-5.66	247.2	0	-247.2	0.1102	0.54141
MSMEG_0828c	-	immunogenic protein MPT63	5	81.2	16	-2.34	406	80.21	-325.8	0.1104	0.54199
MSMEG_3493	-	putative secreted protein	5	459	197.9	-1.21	2295	989.25	-1305.8	0.1109	0.54405
MSMEG_0643c	-	extracellular solute-binding protein, family protein 5, putative	25	434.3	944.3	1.12	10857.2	23608.3	12751.1	0.111	0.54414
MSMEG_4107c	-	phosphoglycerate mutase, putative	9	123.6	47.5	-1.38	1112.2	427.78	-684.4	0.1112	0.54433
MSMEG_6565c	-	hypothetical protein MSMEG_6565	5	105.9	10.7	-3.31	529.6	53.47	-476.1	0.1112	0.54433
MSMEG_1603	-	inositol-5-monophosphate dehydrogenase	11	142.8	43.8	-1.71	1571.2	481.26	-1090	0.1114	0.54451
MSMEG_5623c	-	L-carnitine dehydratase/bile acid-inducible protein F	16	51.9	272.4	2.39	829.7	4358.05	3528.3	0.1114	0.54451
MSMEG_2721c	hypB	hydrogenase accessory protein HypB	6	53	13.4	-1.99	317.8	80.21	-237.6	0.1116	0.5447
MSMEG_4400c	-	alcohol dehydrogenase, zinc-containing	6	58.8	4.5	-3.72	353.1	26.74	-326.3	0.1116	0.5447
MSMEG_1759	-	hypothetical protein MSMEG_1759	7	358.1	145.1	-1.3	2506.9	1015.99	-1490.9	0.1121	0.54674
MSMEG_4973	-	glyoxalase/bleomycin resistance protein/dioxygenase	7	121.1	42	-1.53	847.4	294.1	-553.3	0.1123	0.54732
MSMEG_3380	-	pyridoxamine 5'-phosphate oxidase-related, FMN-binding	7	58	11.5	-2.34	406	80.21	-325.8	0.1125	0.5479
MSMEG_3645c	-	hypothetical protein MSMEG_3645	4	123.6	13.4	-3.21	494.3	53.47	-440.8	0.113	0.54954
MSMEG_5375c	-	GntR-family protein transcriptional regulator	6	865	285.2	-1.6	5190.3	1711.14	-3479.1	0.113	0.54954
MSMEG_0741	-	hypothetical protein MSMEG_0741	7	75.7	3.8	-4.31	529.6	26.74	-502.9	0.1134	0.55108
MSMEG_2718c	-	iron-sulfur cluster-binding protein, Rieske family protein, putative	5	63.6	0	-6.01	317.8	0	-317.8	0.1135	0.55117
MSMEG_1654	-	isocitrate dehydrogenase, NADP-dependent	26	10.9	26.7	1.3	282.5	695.15	412.7	0.114	0.5532
MSMEG_2573c	-	hypothetical protein MSMEG_2573	12	154.5	53.5	-1.53	1853.7	641.68	-1212	0.1144	0.55419
MSMEG_6217	-	integral membrane protein	6	26.5	4.5	-2.57	158.9	26.74	-132.1	0.1144	0.55419
MSMEG_5622c	-	putative acyl-CoA dehydrogenase	8	48.5	3.3	-3.86	388.4	26.74	-361.7	0.1145	0.55419
MSMEG_1012c	-	alkaline phosphatase	15	128.3	55.3	-1.22	1924.3	828.83	-1095.5	0.1147	0.55419
MSMEG_1488	-	acetolactate synthase	18	50	20.8	-1.27	900.4	374.31	-526	0.1147	0.55419
MSMEG_4351	-	oxidoreductase YjgI	7	63.1	7.6	-3.05	441.4	53.47	-387.9	0.1147	0.55419
MSMEG_6392c	-	polyketide synthase	54	1.3	0	-1.21	70.6	0	-70.6	0.115	0.55524
MSMEG_0283	-	short chain dehydrogenase	5	53	5.3	-3.31	264.8	26.74	-238.1	0.1158	0.5587
MSMEG_0236	-	putative transmembrane protein	4	216.3	26.7	-3.02	865	106.95	-758.1	0.116	0.55926
MSMEG_0313c	edd	phosphogluconate dehydratase	14	205.5	97.4	-1.08	2877.6	1363.56	-1514	0.1162	0.55983
MSMEG_3987	-	FAD dependent oxidoreductase	29	65.7	181.6	1.47	1906.6	5267.09	3360.5	0.1163	0.55991
MSMEG_5360c	-	formate/nitrate transporter	8	326.6	1009.3	1.63	2612.8	8074.42	5461.6	0.1166	0.56095
MSMEG_6383	-	transcription regulator FurA	6	76.5	17.8	-2.1	459	106.95	-352.1	0.1171	0.56295
MSMEG_6843c	-	NAD-dependent epimerase/dehydratase	7	113.5	11.5	-3.31	794.4	80.21	-714.2	0.1174	0.56399
MSMEG_3763	-	ABC transporter efflux protein, DrrB family protein	7	131.1	26.7	-2.29	918	187.16	-730.9	0.1181	0.56695
MSMEG_2054c	-	NADH dehydrogenase subunit J	7	45.4	3.8	-3.57	317.8	26.74	-291	0.1184	0.56798
MSMEG_5131	-	hypothetical protein MSMEG_5131	6	67.7	13.4	-2.34	406	80.21	-325.8	0.1186	0.56854
MSMEG_6045c	-	ABC heavy metal transporter, inner membrane subunit	5	247.2	37.4	-2.72	1235.8	187.16	-1048.6	0.1187	0.56861
MSMEG_5047c	-	drug resistance transporter Bcr/CflA subfamily protein	8	286.9	56.8	-2.34	2295	454.52	-1840.5	0.1189	0.56916
MSMEG_4715c	-	acyl-CoA dehydrogenase	14	64.3	24.8	-1.37	900.4	347.57	-552.8	0.1191	0.56971
MSMEG_4937c	atpG	F0F1 ATP synthase subunit gamma	11	401.2	206.6	-0.96	4413.5	2272.6	-2140.9	0.1195	0.57122
MSMEG_2774c	-	diguanylate cyclase	9	276.6	112.9	-1.29	2489.2	1015.99	-1473.2	0.1196	0.57129
MSMEG_5111	-	hypothetical protein MSMEG_5111	7	55.5	7.6	-2.86	388.4	53.47	-334.9	0.1197	0.57136
MSMEG_4768	-	transcriptional regulator	6	20.6	0	-4.43	123.6	0	-123.6	0.12	0.57198
MSMEG_4818	-	putative cytochrome P450 123	17	115.3	45.6	-1.34	1959.6	775.36	-1184.2	0.12	0.57198
MSMEG_4938c	atpA	F0F1 ATP synthase subunit alpha	11	547.3	216.3	-1.34	6020	2379.55	-3640.5	0.1201	0.57205
MSMEG_0308	-	dihydrofolate reductase	8	229.5	73.5	-1.64	1836	588.2	-1247.8	0.1206	0.57403
MSMEG_3450	dehII	haloacid dehalogenase, type II	6	161.8	22.3	-2.86	971	133.68	-837.3	0.1216	0.57769
MSMEG_0260	-	DNA-binding protein	8	229.5	73.5	-1.64	1836	588.2	-1247.8	0.1217	0.57769
MSMEG_3283c	-	membrane transport protein	12	133.9	49	-1.45	1606.5	588.2	-1018.3	0.1218	0.57769
MSMEG_5672c	gltA	type II citrate synthase	26	24.4	134.7	2.46	635.5	3502.48	2866.9	0.1218	0.57769
MSMEG_6243c	-	response regulator receiver domain-containing protein	6	17.7	0	-4.22	105.9	0	-105.9	0.1218	0.57769
MSMEG_6356c	-	AraC family transcriptional regulator	7	53	7.6	-2.79	370.7	53.47	-317.3	0.122	0.57823
MSMEG_4879c	-	hypothetical protein MSMEG_4879	6	17.7	0	-4.22	105.9	0	-105.9	0.1223	0.57924
MSMEG_3222	-	prolipoprotein diacylglyceryl transferase	17	50.9	265.8	2.38	865	4518.47	3653.4	0.1224	0.57931
MSMEG_0581	gabT	4-aminobutyrate transaminase	10	180.1	80.2	-1.17	1800.7	802.09	-998.6	0.1226	0.57985
MSMEG_4301c	-	acyl-CoA synthetase	24	175.1	91.3	-0.94	4201.7	2192.39	-2009.3	0.1228	0.57998
MSMEG_5532	-	FAD dependent oxidoreductase	13	55.7	18.5	-1.59	723.8	240.63	-483.2	0.1228	0.57998
MSMEG_5804	-	hypothetical protein MSMEG_5804	5	105.9	16	-2.72	529.6	80.21	-449.4	0.1229	0.58004
MSMEG_5572c	-	sugar ABC transporter permease protein	9	35.3	5.9	-2.57	317.8	53.47	-264.3	0.1232	0.5807
MSMEG_1742	-	oxidoreductase	12	113.3	42.3	-1.42	1359.4	507.99	-851.4	0.1233	0.5807
MSMEG_4808	-	amidohydrolase family protein	18	130.4	53.5	-1.29	2348	962.51	-1385.5	0.1233	0.5807
MSMEG_0348	-	mce-family protein mce3c	22	126.8	41.3	-1.62	2789.3	909.04	-1880.3	0.1242	0.58453
MSMEG_6037c	-	2-hydroxy-6-ketonona-2,4-dienedioic acid hydrolase	6	126.5	22.3	-2.51	759.1	133.68	-625.4	0.1245	0.58553
MSMEG_2591	-	hypothetical protein MSMEG_2591	5	67.1	5.3	-3.65	335.4	26.74	-308.7	0.125	0.58747
MSMEG_0294c	fabG	3-oxoacyl-(acyl-carrier-protein) reductase	6	20.6	0	-4.43	123.6	0	-123.6	0.1251	0.58753
MSMEG_0457c	-	DNA topoisomerase IV subunit B	11	207	63.2	-1.71	2277.4	695.15	-1582.2	0.1254	0.58853
MSMEG_5418	-	iron permease FTR1	8	289.1	66.8	-2.11	2312.7	534.73	-1777.9	0.1255	0.58859
MSMEG_3008	-	putative sigma 54 type regulator	7	50.4	7.6	-2.72	353.1	53.47	-299.6	0.1261	0.59058
MSMEG_6215c	-	hypothetical protein MSMEG_6215	6	229.5	686.2	1.58	1377	4117.42	2740.4	0.1261	0.59058
MSMEG_0723c	-	hypothetical protein MSMEG_0723	10	109.5	34.8	-1.65	1094.5	347.57	-747	0.1264	0.59157
MSMEG_6610c	-	protein of unknown function DUF58, putative	8	72.8	10	-2.86	582.6	80.21	-502.4	0.1274	0.59583
MSMEG_3511	-	hydroxylase	16	101.5	35.1	-1.53	1624.2	561.47	-1062.7	0.1276	0.59635
MSMEG_6379	-	transporter, major facilitator family protein	16	263.7	123.7	-1.09	4219.3	1978.5	-2240.8	0.1277	0.59641
MSMEG_1824c	-	transcriptional regulator, LytR family protein	9	41.2	5.9	-2.79	370.7	53.47	-317.3	0.1278	0.59646
MSMEG_2323c	-	GntR-family protein transcriptional regulator	12	80.9	26.7	-1.6	971	320.84	-650.1	0.128	0.59698
MSMEG_4542	-	oligopeptide transport integral membrane protein	8	28.7	6.7	-2.1	229.5	53.47	-176	0.1281	0.59703
MSMEG_2598	-	short chain dehydrogenase	5	95.3	16	-2.57	476.7	80.21	-396.4	0.1283	0.59755
MSMEG_0020c	-	periplasmic binding protein	10	35.3	5.3	-2.72	353.1	53.47	-299.6	0.1287	0.59899
MSMEG_0234c	-	metallopeptidase	25	260.6	142.2	-0.87	6514.3	3555.95	-2958.4	0.1289	0.5991
MSMEG_3817	-	hypothetical protein MSMEG_3817	7	297.6	87.8	-1.76	2083.2	614.94	-1468.2	0.1289	0.5991
MSMEG_6115c	-	phosphoglycerate dehydrogenase	11	94.7	36.5	-1.38	1041.6	401.05	-640.5	0.1292	0.60007
MSMEG_5454	-	choloylglycine hydrolase, putative	11	166.9	60.8	-1.46	1836	668.41	-1167.6	0.1295	0.60105
MSMEG_0214c	-	L-sorbosone dehydrogenase	12	189.8	64.6	-1.55	2277.4	775.36	-1502	0.1296	0.6011
MSMEG_4922c	-	hypothetical protein MSMEG_4922	5	123.6	26.7	-2.21	617.9	133.68	-484.2	0.1298	0.60161
MSMEG_1642c	-	ABC transporter, ATP-binding protein	26	184	77.1	-1.25	4784.2	2005.24	-2779	0.1302	0.60305
MSMEG_4783c	-	hypothetical protein MSMEG_4783	5	35.3	5.3	-2.72	176.5	26.74	-149.8	0.1304	0.60356
MSMEG_2590	-	AraC-family protein transcriptional regulator	7	156.4	49.7	-1.65	1094.5	347.57	-747	0.1309	0.60467
MSMEG_4512c	MbtD	polyketide synthetase mbtd	19	40	11.3	-1.83	759.1	213.89	-545.2	0.1309	0.60467
MSMEG_1835	-	TobH protein	8	17.7	3.3	-2.4	141.2	26.74	-114.5	0.131	0.60467
MSMEG_5817c	-	hypothetical protein MSMEG_5817	5	31.8	5.3	-2.57	158.9	26.74	-132.1	0.131	0.60467
MSMEG_6126	-	D-isomer specific 2-hydroxyacid dehydrogenase	12	172.1	69.1	-1.32	2065.5	828.83	-1236.7	0.1317	0.60748
MSMEG_2010c	-	stress responsive A/B barrel domain superfamily protein	6	53	13.4	-1.99	317.8	80.21	-237.6	0.1318	0.60753
MSMEG_0889	-	succinic semialdehyde dehydrogenase	17	273.1	129	-1.08	4643	2192.39	-2450.6	0.1319	0.60757
MSMEG_1936	-	hypothetical protein MSMEG_1936	14	248.4	101.2	-1.3	3477.8	1417.03	-2060.8	0.132	0.60762
MSMEG_5143c	-	HTH-type transcriptional regulator DegA	8	46.3	6.7	-2.79	370.7	53.47	-317.3	0.1321	0.60766
MSMEG_4213	-	cytochrome P450 hydroxylase	8	59.6	13.4	-2.16	476.7	106.95	-369.7	0.1325	0.60908
MSMEG_2150c	-	putative transposition helper protein	9	39.2	3	-3.72	353.1	26.74	-326.3	0.1328	0.61004
MSMEG_3252	-	hypothetical protein MSMEG_3252	3	223.6	17.8	-3.65	670.9	53.47	-617.4	0.1333	0.61192
MSMEG_1332c	-	hypothetical protein MSMEG_1332	16	141.2	367.6	1.38	2259.7	5882.03	3622.3	0.1335	0.61242
MSMEG_0070	-	hypothetical protein MSMEG_0070	6	153	62.4	-1.29	918	374.31	-543.7	0.1339	0.6135
MSMEG_1112c	-	aconitate hydratase	16	86.1	26.7	-1.69	1377	427.78	-949.2	0.1341	0.6135
MSMEG_4168c	-	propionate CoA-transferase	26	82.2	28.8	-1.51	2136.1	748.62	-1387.5	0.1341	0.6135
MSMEG_5373c	-	nitrilase 2	17	96.6	23.6	-2.03	1641.8	401.05	-1240.8	0.1341	0.6135
MSMEG_1858	-	putative transposition helper protein	9	29.4	3	-3.31	264.8	26.74	-238.1	0.1342	0.61354
MSMEG_0194c	-	serine esterase, cutinase family protein	8	154.5	50.1	-1.62	1235.8	401.05	-834.7	0.1345	0.61449
MSMEG_2589c	-	hypothetical protein MSMEG_2589	6	111.8	8.9	-3.65	670.9	53.47	-617.4	0.1348	0.61544
MSMEG_2616	cobO	cob(I)yrinic acid a,c-diamide adenosyltransferase	4	123.6	13.4	-3.21	494.3	53.47	-440.8	0.135	0.61594
MSMEG_6845c	-	trap dicarboxylate transporter, dctm subunit	12	91.2	29	-1.65	1094.5	347.57	-747	0.1355	0.6178
MSMEG_2702c	hypD	hydrogenase expression/formation protein HypD	13	50.2	14.4	-1.8	653.2	187.16	-466	0.1362	0.62057
MSMEG_5030	-	hypothetical protein MSMEG_5030	7	169	53.5	-1.66	1182.8	374.31	-808.5	0.1364	0.62106
MSMEG_4577c	-	DegV family protein	9	13.7	0	-3.88	123.6	0	-123.6	0.1365	0.62109
MSMEG_2071c	-	transcriptional regulator, TetR family protein	4	30.9	0	-5	123.6	0	-123.6	0.1366	0.62113
MSMEG_2695	-	35 kDa protein	4	97.1	13.4	-2.86	388.4	53.47	-334.9	0.1368	0.62162
MSMEG_5658	-	epoxide hydrolase	17	94.5	42.5	-1.15	1606.5	721.89	-884.6	0.1373	0.62347
MSMEG_4974c	-	rrf2 family protein (putative transcriptional regulator)	4	110.3	0	-6.8	441.4	0	-441.4	0.1376	0.62441
MSMEG_0078c	-	hypothetical protein MSMEG_0078	6	105.9	13.4	-2.99	635.5	80.21	-555.3	0.138	0.6258
MSMEG_3534	-	4-hydroxybenzoyl-CoA thioesterase	4	83.9	0	-6.41	335.4	0	-335.4	0.1381	0.62583
MSMEG_0420c	-	hypothetical protein MSMEG_0420	4	70.6	0	-6.16	282.5	0	-282.5	0.1387	0.62812
MSMEG_3525	-	transcriptional regulator, XRE family protein	4	35.3	0	-5.18	141.2	0	-141.2	0.1389	0.62857
MSMEG_6894c	rplI	50S ribosomal protein L9	4	317.8	33.4	-3.25	1271.1	133.68	-1137.4	0.1391	0.62857
MSMEG_0098	-	methyltransferase	4	136.8	0	-7.11	547.3	0	-547.3	0.1395	0.62857
MSMEG_3429	-	O-acyl transferase	29	62.1	21.2	-1.55	1800.7	614.94	-1185.8	0.1395	0.62857
MSMEG_6939c	-	Soj family protein	10	17.7	2.7	-2.72	176.5	26.74	-149.8	0.1398	0.62857
MSMEG_6499	-	hypothetical protein MSMEG_6499	10	178.3	82.9	-1.11	1783.1	828.83	-954.2	0.14	0.62857
MSMEG_6796	-	hypothetical protein MSMEG_6796	4	39.7	0	-5.35	158.9	0	-158.9	0.14	0.62857
MSMEG_3311c	-	acyl carrier protein	4	158.9	0	-7.32	635.5	0	-635.5	0.1401	0.62857
MSMEG_4856c	-	cytochrome P450	9	35.3	3	-3.57	317.8	26.74	-291	0.1403	0.62857
MSMEG_6703	-	N5,N10- methylenetetrahydromethanopterin reductase-related protein	4	30.9	6.7	-2.21	123.6	26.74	-96.8	0.1403	0.62857
MSMEG_5445c	-	hypothetical protein MSMEG_5445	4	66.2	6.7	-3.31	264.8	26.74	-238.1	0.1404	0.62857
MSMEG_5387	-	hypothetical protein MSMEG_5387	4	167.7	6.7	-4.65	670.9	26.74	-644.1	0.1406	0.62857
MSMEG_5884	-	3-hydroxyisobutyrate dehydrogenase family protein	4	61.8	0	-5.97	247.2	0	-247.2	0.1406	0.62857
MSMEG_5751c	-	putative adhesin/hemolysin	4	70.6	6.7	-3.4	282.5	26.74	-255.7	0.1407	0.62857
MSMEG_3629c	-	hypothetical protein MSMEG_3629	4	79.4	0	-6.33	317.8	0	-317.8	0.1408	0.62857
MSMEG_4662	-	deoxyribose-phosphate aldolase superfamily protein	4	30.9	0	-5	123.6	0	-123.6	0.1409	0.62857
MSMEG_6292	-	transcription elongation factor GreA	4	119.2	0	-6.91	476.7	0	-476.7	0.1409	0.62857
MSMEG_2489c	-	transcriptional regulator, GntR family protein, putative	4	251.6	20.1	-3.65	1006.3	80.21	-926.1	0.1411	0.62857
MSMEG_4840	-	Rieske (2Fe-2S) domain-containing protein	21	107.6	43.3	-1.31	2259.7	909.04	-1350.7	0.1411	0.62857
MSMEG_5971	-	hypothetical protein MSMEG_5971	4	53	0	-5.75	211.8	0	-211.8	0.1413	0.62857
MSMEG_0423	-	hypothetical protein MSMEG_0423	4	304.5	1443.8	2.25	1218.1	5775.08	4557	0.1414	0.62857
MSMEG_0829c	xth	exodeoxyribonuclease III	10	266.6	104.3	-1.35	2665.8	1042.72	-1623	0.1414	0.62857
MSMEG_2417	-	hypothetical protein MSMEG_2417	4	216.3	6.7	-5.02	865	26.74	-838.3	0.1414	0.62857
MSMEG_5385c	-	metallo-beta-lactamase family protein	23	112.1	51.1	-1.13	2577.5	1176.41	-1401.1	0.1415	0.62857
MSMEG_6671	-	sulfate/thiosulfate import ATP-binding protein CysA	8	167.7	16.7	-3.33	1341.7	133.68	-1208	0.1415	0.62857
MSMEG_1600	-	hypothetical protein MSMEG_1600	8	152.3	60.2	-1.34	1218.1	481.26	-736.9	0.1416	0.62857
MSMEG_1781c	-	hypothetical protein MSMEG_1781	4	88.3	20.1	-2.14	353.1	80.21	-272.9	0.1416	0.62857
MSMEG_3126	-	SUF system FeS assembly protein, NifU family protein	4	0	260.7	8.03	0	1042.72	1042.7	0.1416	0.62857
MSMEG_4356	-	inner membrane ABC transporter permease protein YddQ	4	150.1	0	-7.24	600.2	0	-600.2	0.1416	0.62857
MSMEG_5460c	-	hypothetical protein MSMEG_5460	4	92.7	0	-6.55	370.7	0	-370.7	0.1417	0.62857
MSMEG_5509	-	hypothetical protein MSMEG_5509	4	35.3	0	-5.18	141.2	0	-141.2	0.1417	0.62857
MSMEG_4098c	-	ABC transporter ATP-binding protein	14	51.7	21	-1.3	723.8	294.1	-429.7	0.142	0.62924
MSMEG_2480	-	transcriptional regulator, GntR family protein, putative	4	83.9	0	-6.41	335.4	0	-335.4	0.1422	0.62924
MSMEG_6411	-	hypothetical protein MSMEG_6411	4	141.2	0	-7.15	564.9	0	-564.9	0.1423	0.62924
MSMEG_1120	-	nitrilase/cyanide hydratase and apolipoprotein N-acyltransferase	13	101.9	41.1	-1.31	1324.1	534.73	-789.3	0.1424	0.62924
MSMEG_4154	-	transposase, Mutator family protein	12	76.5	22.3	-1.78	918	267.36	-650.6	0.1424	0.62924
MSMEG_2089	ftsE	cell division ATP-binding protein FtsE	4	97.1	0	-6.62	388.4	0	-388.4	0.1425	0.62924
MSMEG_6225	-	proton antiporter efflux pump	4	128	6.7	-4.26	512	26.74	-485.2	0.1426	0.62924
MSMEG_6795	-	enoyl-CoA hydratase/isomerase family protein	4	88.3	6.7	-3.72	353.1	26.74	-326.3	0.1426	0.62924
MSMEG_5466	-	oxidoreductase	4	128	6.7	-4.26	512	26.74	-485.2	0.1427	0.62927
MSMEG_3101c	zwf	glucose-6-phosphate 1-dehydrogenase	15	117.7	411.7	1.81	1765.4	6176.13	4410.7	0.143	0.63018
MSMEG_1190	-	serine/threonine-protein kinase PknD	23	95.9	34.9	-1.46	2206.8	802.09	-1404.7	0.1433	0.63108
MSMEG_1588	-	hypothetical protein MSMEG_1588	4	97.1	0	-6.62	388.4	0	-388.4	0.1434	0.63111
MSMEG_1554	eutC	ethanolamine ammonia-lyase small subunit	4	220.7	6.7	-5.05	882.7	26.74	-856	0.1435	0.63114
MSMEG_6031c	-	carveol dehydrogenase	4	128	6.7	-4.26	512	26.74	-485.2	0.1439	0.63248
MSMEG_4427	-	transmembrane efflux pump	11	59.4	12.2	-2.29	653.2	133.68	-519.5	0.144	0.63251
MSMEG_4278c	gcvT	glycine cleavage system aminomethyltransferase T	12	261.9	109.2	-1.26	3142.4	1310.09	-1832.3	0.1441	0.63253
MSMEG_0702c	-	monooxygenase	10	190.7	69.5	-1.46	1906.6	695.15	-1211.5	0.1442	0.63256
MSMEG_3704	-	3-alpha-hydroxysteroid dehydrogenase	8	145.6	56.8	-1.36	1165.2	454.52	-710.6	0.1443	0.63258
MSMEG_2901	-	hypothetical protein MSMEG_2901	4	61.8	0	-5.97	247.2	0	-247.2	0.1448	0.63436
MSMEG_0235	-	hypothetical protein MSMEG_0235	4	269.2	6.7	-5.33	1076.9	26.74	-1050.2	0.1453	0.63531
MSMEG_1071	-	3-oxoacyl-	4	229.5	0	-7.85	918	0	-918	0.1453	0.63531
MSMEG_2988c	-	carbon-nitrogen hydrolase family protein	14	132.4	59.2	-1.16	1853.7	828.83	-1024.8	0.1453	0.63531
MSMEG_3141	-	hypothetical protein MSMEG_3141	4	66.2	0	-6.07	264.8	0	-264.8	0.1455	0.63536
MSMEG_5201	-	regulatory protein GntR, HTH	4	57.4	0	-5.87	229.5	0	-229.5	0.1455	0.63536
MSMEG_6558	-	putative enoyl-CoA hydratase	4	17.7	0	-4.22	70.6	0	-70.6	0.1459	0.63547
MSMEG_6680c	-	integral membrane protein	4	92.7	0	-6.55	370.7	0	-370.7	0.1459	0.63547
MSMEG_1266c	-	ankyrin repeat-containing protein	4	101.5	0	-6.68	406	0	-406	0.146	0.63547
MSMEG_1297	-	hydroxydechloroatrazine ethylaminohydrolase	11	38.5	14.6	-1.4	423.7	160.42	-263.3	0.146	0.63547
MSMEG_4996	oppC	ABC transporter, permease protein OppC	10	178.3	72.2	-1.3	1783.1	721.89	-1061.2	0.146	0.63547
MSMEG_6615c	-	hypothetical protein MSMEG_6615	4	92.7	0	-6.55	370.7	0	-370.7	0.1461	0.6355
MSMEG_5943	-	putative peroxisomal multifunctional enzyme type 2	5	53	10.7	-2.31	264.8	53.47	-211.3	0.1467	0.63769
MSMEG_6862	-	putative transcription regulator	4	30.9	0	-5	123.6	0	-123.6	0.1468	0.63772
MSMEG_2667c	-	HpcH/HpaI aldolase/citrate lyase family protein, putative	11	208.6	72.9	-1.52	2295	802.09	-1492.9	0.1471	0.63778
MSMEG_3839c	-	DNA polymerase I	28	5.7	22.9	2.01	158.9	641.68	482.8	0.1471	0.63778
MSMEG_4697c	-	hypothetical protein MSMEG_4697	4	39.7	0	-5.35	158.9	0	-158.9	0.1471	0.63778
MSMEG_2944	ruvA	Holliday junction DNA helicase motor protein	6	53	4.5	-3.57	317.8	26.74	-291	0.1472	0.6378
MSMEG_6341c	-	6-phosphogluconate dehydrogenase, NAD-binding	4	123.6	6.7	-4.21	494.3	26.74	-467.6	0.1475	0.63869
MSMEG_3433	-	IS1549, transposase	16	259.3	486.3	0.91	4148.7	7780.32	3631.6	0.1479	0.64001
MSMEG_0090c	-	hypothetical protein MSMEG_0090	17	170.3	67.6	-1.33	2895.3	1149.67	-1745.6	0.1482	0.6409
MSMEG_4320c	-	alkyl hydroperoxide reductase/ Thiol specific antioxidant/ Mal allergen	4	39.7	0	-5.35	158.9	0	-158.9	0.1483	0.64092
MSMEG_3867c	-	ATPase family protein associated with various cellular activities	13	146.7	53.5	-1.46	1906.6	695.15	-1211.5	0.1489	0.64309
MSMEG_1096	-	urease accessory protein UreD, putative	6	282.5	1327.9	2.23	1694.8	7967.48	6272.7	0.1494	0.64484
MSMEG_5274	purT	phosphoribosylglycinamide formyltransferase 2	7	211.8	53.5	-1.99	1482.9	374.31	-1108.6	0.1498	0.64615
MSMEG_1700	-	TetR-family protein transcriptional regulator	4	66.2	13.4	-2.31	264.8	53.47	-211.3	0.1505	0.64875
MSMEG_3346	-	putative hydroxyacid aldolase	8	59.6	20.1	-1.57	476.7	160.42	-316.2	0.1507	0.6492
MSMEG_3354	-	TetR family protein transcriptional regulatory protein	8	57.4	10	-2.52	459	80.21	-378.8	0.1508	0.64921
MSMEG_3488	-	transcriptional regulator, AraC family protein	7	141.2	19.1	-2.89	988.6	133.68	-854.9	0.151	0.64966
MSMEG_3103c	tkt	transketolase	20	19.4	69.5	1.84	388.4	1390.3	1001.9	0.1523	0.65483
MSMEG_1014c	dinB	DNA polymerase IV	5	247.2	855.6	1.79	1235.8	4277.84	3042.1	0.153	0.65742
MSMEG_2965	relA	GTP pyrophosphokinase	23	62.2	230.2	1.89	1430	5293.83	3863.9	0.1532	0.65744
MSMEG_3556	-	integral membrane transporter	19	114.3	59.1	-0.95	2171.4	1122.93	-1048.5	0.1532	0.65744
MSMEG_6677c	-	transcriptional regulator, LysR family protein	4	88.3	6.7	-3.72	353.1	26.74	-326.3	0.1533	0.65745
MSMEG_6602c	-	oxidoreductase	19	170	76	-1.16	3230.7	1443.77	-1786.9	0.1565	0.67074
MSMEG_1033	nrdF2	ribonucleotide-diphosphate reductase subunit beta	18	258.9	442.6	0.77	4660.7	7967.48	3306.8	0.1566	0.67074
MSMEG_2260c	-	putative transcriptional regulator	9	219.7	92.1	-1.25	1977.3	828.83	-1148.4	0.157	0.67203
MSMEG_0230	-	hypothetical protein MSMEG_0230	5	353.1	85.6	-2.05	1765.4	427.78	-1337.6	0.1574	0.67331
MSMEG_5469c	-	acetyltransferase, GNAT family protein	5	95.3	0	-6.59	476.7	0	-476.7	0.1575	0.67331
MSMEG_6778c	-	hypothetical protein MSMEG_6778	7	244.6	91.7	-1.42	1712.4	641.68	-1070.8	0.1576	0.67331
MSMEG_6900c	-	penicillin-binding protein 1	22	20.1	2.4	-3.05	441.4	53.47	-387.9	0.1577	0.67331
MSMEG_3079	-	hypothetical protein MSMEG_3079	11	345.1	162.8	-1.08	3795.6	1791.35	-2004.3	0.1578	0.67331
MSMEG_1612	-	extracellular solute-binding protein, family protein 3	11	107.5	36.5	-1.56	1182.8	401.05	-781.8	0.158	0.67373
MSMEG_5516c	purN	phosphoribosylglycinamide formyltransferase	6	356	62.4	-2.51	2136.1	374.31	-1761.8	0.1581	0.67373
MSMEG_6538	-	3-oxoacyl-(acyl-carrier-protein) reductase, putative	6	361.9	958.1	1.4	2171.4	5748.35	3576.9	0.1585	0.675
MSMEG_6750c	-	hypothetical protein MSMEG_6750	9	247.2	92.1	-1.42	2224.4	828.83	-1395.6	0.1586	0.675
MSMEG_2173	-	GntR-family protein transcriptional regulator	7	305.2	49.7	-2.62	2136.1	347.57	-1788.6	0.159	0.67628
MSMEG_4451	-	monooxygenase	25	306.5	181.8	-0.75	7661.8	4545.2	-3116.6	0.1593	0.67713
MSMEG_5826	-	pyruvate decarboxylase	19	212.8	104.1	-1.03	4042.8	1978.5	-2064.3	0.1602	0.68052
MSMEG_0892	-	hypothetical protein MSMEG_0892	8	41.9	3.3	-3.65	335.4	26.74	-308.7	0.1611	0.68347
MSMEG_6093	-	hypothetical protein MSMEG_6093	5	63.6	10.7	-2.57	317.8	53.47	-264.3	0.1611	0.68347
MSMEG_6096c	-	pantothenate kinase	5	60	5.3	-3.49	300.1	26.74	-273.4	0.1612	0.68347
MSMEG_5764	-	putative cyanamide hydratase	5	42.4	0	-5.44	211.8	0	-211.8	0.1614	0.68389
MSMEG_0218	-	3-demethylubiquinone-9 3-methyltransferase	6	253	89.1	-1.51	1518.2	534.73	-983.5	0.1618	0.68471
MSMEG_2955	-	hypothetical protein MSMEG_2955	5	17.7	0	-4.22	88.3	0	-88.3	0.1618	0.68471
MSMEG_5221c	-	GCN5-related N-acetyltransferase	9	262.8	80.2	-1.71	2365.6	721.89	-1643.8	0.1619	0.68471
MSMEG_0262	-	hypothetical protein MSMEG_0262	5	38.8	0	-5.32	194.2	0	-194.2	0.1624	0.68548
MSMEG_0517	-	sugar binding-protein dependent transporter system permease	5	35.3	0	-5.18	176.5	0	-176.5	0.1625	0.68548
MSMEG_1524	rpoA	DNA-directed RNA polymerase subunit alpha	10	3.5	208.5	5.88	35.3	2085.45	2050.1	0.1625	0.68548
MSMEG_5533	-	4Fe-4S ferredoxin, iron-sulfur binding	5	91.8	0	-6.54	459	0	-459	0.1627	0.68548
MSMEG_5913c	-	dioxygenase	5	24.7	0	-4.68	123.6	0	-123.6	0.1627	0.68548
MSMEG_6145	-	hypothetical protein MSMEG_6145	14	167.7	85.9	-0.96	2348	1203.14	-1144.8	0.1627	0.68548
MSMEG_2638	-	hypothetical protein MSMEG_2638	14	102.1	22.9	-2.16	1430	320.84	-1109.1	0.1629	0.68548
MSMEG_6230c	-	acyltransferase	18	220.7	106.9	-1.05	3972.2	1925.03	-2047.1	0.1629	0.68548
MSMEG_0049c	-	pirin domain-containing protein	9	131.4	41.6	-1.66	1182.8	374.31	-808.5	0.163	0.68548
MSMEG_5661c	-	ABC transporter ATP-binding protein	17	177.6	67.6	-1.39	3018.8	1149.67	-1869.2	0.1634	0.68673
MSMEG_0742c	-	transcriptional regulatory protein	5	109.5	10.7	-3.36	547.3	53.47	-493.8	0.1638	0.68706
MSMEG_3520	-	TetR-family protein transcriptional regulator	5	14.1	0	-3.92	70.6	0	-70.6	0.1638	0.68706
MSMEG_6861c	-	cupin domain-containing protein	9	94.2	38.6	-1.29	847.4	347.57	-499.8	0.1639	0.68706
MSMEG_0747	-	carbon monoxide dehydrogenase F protein	5	53	10.7	-2.31	264.8	53.47	-211.3	0.164	0.68706
MSMEG_0986c	-	RemM protein	5	53	0	-5.75	264.8	0	-264.8	0.164	0.68706
MSMEG_0607c	-	methyltransferase, putative, family protein	5	49.4	0	-5.66	247.2	0	-247.2	0.1643	0.68706
MSMEG_0898	-	tagatose-1,6-bisphosphate aldolase GatY	5	45.9	0	-5.55	229.5	0	-229.5	0.1643	0.68706
MSMEG_3963c	-	hypothetical protein MSMEG_3963	5	21.2	0	-4.47	105.9	0	-105.9	0.1643	0.68706
MSMEG_0406c	-	acyl-CoA-dehydrogenase	20	223.3	101.6	-1.14	4466.5	2031.97	-2434.5	0.1644	0.68706
MSMEG_5108	-	hypothetical protein MSMEG_5108	4	203	13.4	-3.92	812.1	53.47	-758.6	0.1646	0.68747
MSMEG_6725c	-	ABC transporter, ATP-binding protein	5	130.6	0	-7.04	653.2	0	-653.2	0.1648	0.68787
MSMEG_4135c	-	lysine decarboxylase superfamily protein	7	83.2	22.9	-1.86	582.6	160.42	-422.2	0.1649	0.68787
MSMEG_5463	-	6-phosphogluconate dehydrogenase, NAD-binding	5	63.6	0	-6.01	317.8	0	-317.8	0.1651	0.68828
MSMEG_2548	-	3-oxoacyl-	5	38.8	0	-5.32	194.2	0	-194.2	0.1653	0.68868
MSMEG_3901c	ectA	L-2,4-diaminobutyric acid acetyltransferase	5	28.2	5.3	-2.4	141.2	26.74	-114.5	0.1655	0.68909
MSMEG_5416c	-	LpqU protein	9	382.5	163.4	-1.23	3442.5	1470.51	-1972	0.1658	0.68944
MSMEG_0468c	-	integral membrane protein	5	289.5	117.6	-1.3	1447.6	588.2	-859.4	0.1659	0.68944
MSMEG_6112c	-	hypothetical protein MSMEG_6112	5	60	0	-5.93	300.1	0	-300.1	0.1659	0.68944
MSMEG_3902c	-	ATPase, AAA family protein	21	300.1	506.7	0.76	6302.5	10641.1	4338.6	0.166	0.68944
MSMEG_3784c	-	transcriptional regulator, IclR family protein	5	17.7	0	-4.22	88.3	0	-88.3	0.1661	0.68944
MSMEG_4239	-	LppM protein	4	172.1	46.8	-1.88	688.5	187.16	-501.4	0.1662	0.68944
MSMEG_6316	-	lipoprotein LpqH	5	63.6	0	-6.01	317.8	0	-317.8	0.1668	0.69063
MSMEG_0639c	-	oligopeptide transport ATP-binding protein AppF	10	164.2	53.5	-1.62	1641.8	534.73	-1107.1	0.1669	0.69063
MSMEG_4982c	-	hypothetical protein MSMEG_4982	19	68.8	29.6	-1.22	1306.4	561.47	-744.9	0.1669	0.69063
MSMEG_6876c	-	branched chain amino acid transport ATP-binding protein	5	155.4	0	-7.29	776.8	0	-776.8	0.1669	0.69063
MSMEG_0071	-	hypothetical protein MSMEG_0071	46	118.2	201.7	0.77	5437.4	9277.57	3840.1	0.1671	0.69104
MSMEG_2661c	-	hypothetical protein MSMEG_2661	5	81.2	0	-6.36	406	0	-406	0.1674	0.6914
MSMEG_6832c	-	hypothetical protein MSMEG_6832	5	53	0	-5.75	264.8	0	-264.8	0.1674	0.6914
MSMEG_0224	-	O-methyltransferase MdmC	5	169.5	5.3	-4.99	847.4	26.74	-820.7	0.1675	0.6914
MSMEG_2608	-	cobalt transport protein CbiM	3	182.4	17.8	-3.36	547.3	53.47	-493.8	0.1676	0.6914
MSMEG_1378	-	1-phosphofructokinase	5	53	10.7	-2.31	264.8	53.47	-211.3	0.1678	0.69174
MSMEG_1477	-	major facilitator superfamily protein	26	147.3	315.7	1.1	3830.9	8208.11	4377.2	0.1681	0.69174
MSMEG_1621c	-	pyrimidine-specific ribonucleoside hydrolase RihA	5	63.6	5.3	-3.57	317.8	26.74	-291	0.1681	0.69174
MSMEG_0142	-	hypothetical protein MSMEG_0142	4	176.5	26.7	-2.72	706.2	106.95	-599.2	0.1682	0.69174
MSMEG_1175	-	putative transcriptional regulatory protein	4	172.1	46.8	-1.88	688.5	187.16	-501.4	0.1682	0.69174
MSMEG_2098c	-	fumarylacetoacetate hydrolase family protein	13	65.2	20.6	-1.66	847.4	267.36	-580	0.1683	0.69174
MSMEG_0458	-	two-component system sensor kinase	8	97.1	16.7	-2.54	776.8	133.68	-643.1	0.1687	0.69295
MSMEG_0124c	-	transcriptional regulator, GntR family protein	5	38.8	0	-5.32	194.2	0	-194.2	0.1688	0.69295
MSMEG_4575c	-	hypothetical protein MSMEG_4575	5	105.9	10.7	-3.31	529.6	53.47	-476.1	0.1691	0.69375
MSMEG_4934	-	ATP:cob(I)alamin adenosyltransferase	6	682.6	311.9	-1.13	4095.7	1871.55	-2224.2	0.1694	0.69456
MSMEG_4388	-	ABC transporter ATP-binding protein	8	59.6	16.7	-1.83	476.7	133.68	-343	0.1696	0.69493
MSMEG_4563c	-	puromycin N-acetyltransferase	9	100	35.6	-1.49	900.4	320.84	-579.5	0.1698	0.69493
MSMEG_6053	bluB	cob(II)yrinic acid a,c-diamide reductase	5	88.3	0	-6.48	441.4	0	-441.4	0.1698	0.69493
MSMEG_3740c	rluB	ribosomal large subunit pseudouridine synthase B	5	63.6	0	-6.01	317.8	0	-317.8	0.17	0.69532
MSMEG_3422	-	D-isomer specific 2-hydroxyacid dehydrogenase, NAD-binding	9	94.2	597.1	2.66	847.4	5374.04	4526.6	0.1703	0.6957
MSMEG_4463c	-	CalR5 protein	14	49.2	19.1	-1.36	688.5	267.36	-421.1	0.1703	0.6957
MSMEG_1107	-	isonitrile hydratase, putative	5	49.4	0	-5.66	247.2	0	-247.2	0.1706	0.69647
MSMEG_0483	-	shikimate transporter	23	54.5	18.6	-1.55	1253.4	427.78	-825.7	0.1707	0.69647
MSMEG_2025	-	putative IclR family protein transcriptional regulator	6	44.1	0	-5.5	264.8	0	-264.8	0.1708	0.69647
MSMEG_2867c	-	3-ketosteroid-delta-1-dehydrogenase	21	64.7	175.7	1.44	1359.4	3689.64	2330.3	0.1711	0.69727
MSMEG_1389	-	hypothetical protein MSMEG_1389	5	42.4	5.3	-2.99	211.8	26.74	-185.1	0.1715	0.69754
MSMEG_1686c	-	NPL/P60-family protein secreted protein	5	31.8	0	-5.03	158.9	0	-158.9	0.1715	0.69754
MSMEG_2583	-	putative transcriptional regulator	5	151.8	69.5	-1.13	759.1	347.57	-411.5	0.1715	0.69754
MSMEG_4242c	-	transcriptional regulatory protein	5	91.8	0	-6.54	459	0	-459	0.1717	0.69754
MSMEG_0335	-	enoyl-CoA hydratase/isomerase	5	42.4	679.1	4	211.8	3395.54	3183.7	0.1718	0.69754
MSMEG_3001c	-	hypothetical protein MSMEG_3001	4	132.4	13.4	-3.31	529.6	53.47	-476.1	0.1718	0.69754
MSMEG_0930c	-	serine 3-dehydrogenase	4	344.3	73.5	-2.23	1377	294.1	-1082.9	0.1719	0.69754
MSMEG_5173	-	O-methyltransferase, putative	5	95.3	529.4	2.47	476.7	2646.91	2170.3	0.172	0.69754
MSMEG_1605	phoU	phosphate transport system regulatory protein PhoU	4	172.1	40.1	-2.1	688.5	160.42	-528.1	0.1721	0.69754
MSMEG_4807	-	amidohydrolase family protein	18	110.8	49	-1.18	1994.9	882.3	-1112.6	0.1729	0.70036
MSMEG_0187c	-	acetyltransferase	10	171.2	80.2	-1.09	1712.4	802.09	-910.3	0.1731	0.70075
MSMEG_6354	-	serine esterase, cutinase family protein	8	132.4	36.8	-1.85	1059.2	294.1	-765.1	0.1733	0.70113
MSMEG_3403	amiF	formamidase	13	73.3	26.7	-1.46	953.3	347.57	-605.7	0.1738	0.70273
MSMEG_6830	-	hypothetical protein MSMEG_6830	14	64.3	24.8	-1.37	900.4	347.57	-552.8	0.1741	0.7035
MSMEG_6530	-	cytochrome c oxidase subunit III family protein	8	39.7	10	-1.99	317.8	80.21	-237.6	0.1742	0.7035
MSMEG_3852c	-	aliphatic sulfonate binding protein	7	73.1	15.3	-2.26	512	106.95	-405	0.1745	0.70429
MSMEG_6425c	-	rhodanese-like domain-containing protein	6	461.9	111.4	-2.05	2771.7	668.41	-2103.3	0.1748	0.70506
MSMEG_1147	-	mce related protein	6	26.5	0	-4.78	158.9	0	-158.9	0.1749	0.70506
MSMEG_0163c	-	hypothetical protein MSMEG_0163	4	79.4	13.4	-2.57	317.8	53.47	-264.3	0.1752	0.70542
MSMEG_0875	-	putative sialic acid transporter	19	171	92.9	-0.88	3248.3	1764.61	-1483.7	0.1752	0.70542
MSMEG_5586	-	hypothetical protein MSMEG_5586	15	151.8	58.8	-1.37	2277.4	882.3	-1395.1	0.1755	0.70619
MSMEG_2850	-	cell entry (mce) related family protein	4	145.6	60.2	-1.28	582.6	240.63	-342	0.1756	0.70619
MSMEG_3432c	-	choline dehydrogenase	22	52.2	19.4	-1.42	1147.5	427.78	-719.7	0.1762	0.70775
MSMEG_5815	-	betaine aldehyde dehydrogenase	13	169.8	43.2	-1.97	2206.8	561.47	-1645.3	0.1762	0.70775
MSMEG_6023c	-	transposase	21	142.9	58.6	-1.29	3001.2	1229.88	-1771.3	0.1765	0.70849
MSMEG_5386	-	rhodanese-like domain-containing protein	4	114.8	26.7	-2.1	459	106.95	-352.1	0.1766	0.70849
MSMEG_0100c	-	phosphotyrosine protein phosphatase ptpb	5	367.2	165.8	-1.15	1836	828.83	-1007.2	0.1767	0.70849
MSMEG_6009c	-	transcriptional regulator, TetR family protein	9	96.1	41.6	-1.21	865	374.31	-490.7	0.1769	0.70887
MSMEG_3347	-	nitrilase/cyanide hydratase and apolipoprotein N-acyltransferase	11	64.2	21.9	-1.55	706.2	240.63	-465.5	0.1773	0.71002
MSMEG_6375c	-	transporter, major facilitator family protein	10	121.8	438.5	1.85	1218.1	4384.79	3166.7	0.1774	0.71002
MSMEG_6372	-	membrane protein	6	26.5	0	-4.78	158.9	0	-158.9	0.1779	0.71158
MSMEG_6742c	-	hypothetical protein MSMEG_6742	5	88.3	5.3	-4.05	441.4	26.74	-414.6	0.178	0.71158
MSMEG_6785c	tpiA	triosephosphate isomerase	6	61.8	4.5	-3.79	370.7	26.74	-344	0.1784	0.71265
MSMEG_2629	rbfA	ribosome-binding factor A	6	14.7	0	-3.97	88.3	0	-88.3	0.1785	0.71265
MSMEG_4316	-	methylated-DNA--protein-cysteine methyltransferase	6	14.7	0	-3.97	88.3	0	-88.3	0.1788	0.71265
MSMEG_5795c	-	4-amino-4-deoxychorismate lyase	6	91.2	4.5	-4.36	547.3	26.74	-520.5	0.1788	0.71265
MSMEG_6655c	-	hypothetical protein MSMEG_6655	6	35.3	4.5	-2.99	211.8	26.74	-185.1	0.1788	0.71265
MSMEG_5852c	purD	phosphoribosylamine--glycine ligase	6	29.4	0	-4.93	176.5	0	-176.5	0.179	0.71303
MSMEG_1875	-	sensor histidine kinase MtrB	8	35.3	6.7	-2.4	282.5	53.47	-229	0.1795	0.7146
MSMEG_4095c	-	putative monooxygenase	8	26.5	3.3	-2.99	211.8	26.74	-185.1	0.18	0.71616
MSMEG_0560c	dapB	dihydrodipicolinate reductase N-terminus domain-containing protein	11	195.8	63.2	-1.63	2153.8	695.15	-1458.6	0.1802	0.71653
MSMEG_6004	-	oxidoreductase, 2-nitropropane dioxygenase family protein	5	45.9	10.7	-2.1	229.5	53.47	-176	0.1809	0.71889
MSMEG_0501c	-	glucosamine-6-phosphate deaminase 1	6	47.1	0	-5.59	282.5	0	-282.5	0.1813	0.72
MSMEG_3328c	-	hypothetical protein MSMEG_3328	6	14.7	0	-3.97	88.3	0	-88.3	0.1815	0.72
MSMEG_4475c	-	LppP protein	4	229.5	60.2	-1.93	918	240.63	-677.4	0.1815	0.72
MSMEG_3487c	-	metal-dependent phosphohydrolase	8	50.8	6.7	-2.92	406	53.47	-352.6	0.1818	0.72034
MSMEG_6015	-	putative acyl-CoA dehydrogenase	9	27.5	196.1	2.84	247.2	1764.61	1517.5	0.1818	0.72034
MSMEG_0015	-	ferric enterobactin transport ATP-binding protein FepC	6	50	0	-5.67	300.1	0	-300.1	0.1823	0.72129
MSMEG_2504c	-	3-isopropylmalate dehydratase small subunit	6	67.7	0	-6.1	406	0	-406	0.1825	0.72129
MSMEG_3543c	-	soluble secreted antigen MPT53	5	176.5	508	1.52	882.7	2539.97	1657.3	0.1825	0.72129
MSMEG_4032c	-	zinc-binding alcohol dehydrogenase	8	35.3	160.4	2.18	282.5	1283.35	1000.9	0.1825	0.72129
MSMEG_5040	-	transcriptional regulator, TetR family protein	6	41.2	0	-5.4	247.2	0	-247.2	0.1827	0.72129
MSMEG_4308	-	5'-nucleotidase	6	14.7	0	-3.97	88.3	0	-88.3	0.1828	0.72129
MSMEG_0793	thiG	thiazole synthase	6	26.5	0	-4.78	158.9	0	-158.9	0.1829	0.72129
MSMEG_2271c	hypB	hydrogenase accessory protein HypB	6	23.5	4.5	-2.4	141.2	26.74	-114.5	0.1829	0.72129
MSMEG_3394	-	cupin domain-containing protein	6	14.7	0	-3.97	88.3	0	-88.3	0.1832	0.72205
MSMEG_5978c	-	GlcNAc-PI de-N-acetylase family protein	7	83.2	15.3	-2.45	582.6	106.95	-475.6	0.1834	0.72241
MSMEG_3848c	-	para-nitrobenzyl esterase	23	189.6	476.6	1.33	4360.5	10962	6601.4	0.1836	0.72278
MSMEG_5614c	-	hypothetical protein MSMEG_5614	6	44.1	0	-5.5	264.8	0	-264.8	0.1846	0.72629
MSMEG_5087c	-	hypothetical protein MSMEG_5087	5	197.7	481.3	1.28	988.6	2406.28	1417.7	0.1858	0.73058
MSMEG_5628c	-	oxidoreductase, short chain dehydrogenase/reductase family protein	7	103.4	11.5	-3.17	723.8	80.21	-643.6	0.1864	0.73248
MSMEG_0369	-	hypothetical protein MSMEG_0369	7	12.6	0	-3.77	88.3	0	-88.3	0.1865	0.73248
MSMEG_5314c	-	hypothetical protein MSMEG_5314	7	37.8	0	-5.28	264.8	0	-264.8	0.1868	0.73323
MSMEG_5263	greA	transcription elongation factor GreA	7	95.8	38.2	-1.33	670.9	267.36	-403.5	0.1871	0.73397
MSMEG_2151c	-	transposase IstA protein, putative	15	101.2	33.9	-1.58	1518.2	507.99	-1010.3	0.1874	0.73472
MSMEG_6733c	-	hydrolase, carbon-nitrogen family protein	8	123.6	360.9	1.55	988.6	2887.54	1898.9	0.188	0.73661
MSMEG_2954	-	LacI-family protein transcriptional regulator	7	20.2	0	-4.4	141.2	0	-141.2	0.1881	0.73661
MSMEG_5632	-	oxidoreductase, short chain dehydrogenase/reductase family protein	7	20.2	0	-4.4	141.2	0	-141.2	0.189	0.73966
MSMEG_1494c	-	transcriptional regulatory protein DegU	6	167.7	53.5	-1.65	1006.3	320.84	-685.4	0.1891	0.73966
MSMEG_6085c	-	hydrolase, alpha/beta hydrolase fold family protein	9	545.3	208	-1.39	4907.8	1871.55	-3036.3	0.1899	0.74236
MSMEG_6324	-	peroxidase	20	196	82.9	-1.24	3919.2	1657.66	-2261.5	0.1902	0.7431
MSMEG_1615	ggt	gamma-glutamyltranspeptidase	7	30.3	3.8	-2.99	211.8	26.74	-185.1	0.1909	0.74531
MSMEG_3658c	-	hypothetical protein MSMEG_3658	7	141.2	462.2	1.71	988.6	3235.12	2246.5	0.191	0.74531
MSMEG_3218	-	hypothetical protein MSMEG_3218	7	12.6	0	-3.77	88.3	0	-88.3	0.1911	0.74531
MSMEG_6247c	-	hypothetical protein MSMEG_6247	10	70.6	29.4	-1.26	706.2	294.1	-412.1	0.1914	0.74605
MSMEG_1111c	-	hypothetical protein MSMEG_1111	9	107.9	35.6	-1.6	971	320.84	-650.1	0.1917	0.74674
MSMEG_4469c	-	cobalt transport protein	4	242.7	66.8	-1.86	971	267.36	-703.6	0.1918	0.74674
MSMEG_3028	aroE	shikimate 5-dehydrogenase	7	12.6	0	-3.77	88.3	0	-88.3	0.1922	0.74787
MSMEG_3447	-	two-component system response regulator	7	20.2	0	-4.4	141.2	0	-141.2	0.1925	0.7486
MSMEG_2224	-	acetyl-CoA C-acyltransferase	7	63.1	0	-6	441.4	0	-441.4	0.193	0.74897
MSMEG_5398c	-	ISMsm4, transposase	16	109.2	53.5	-1.03	1747.7	855.57	-892.2	0.193	0.74897
MSMEG_5437	-	serine/threonine-protein kinase PknB	4	282.5	60.2	-2.23	1129.9	240.63	-889.2	0.1932	0.74897
MSMEG_5627c	-	Rieske (2Fe-2S) domain-containing protein	18	136.3	62.4	-1.13	2453.9	1122.93	-1331	0.1932	0.74897
MSMEG_0733c	dapB	dihydrodipicolinate reductase N-terminus domain-containing protein	10	100.6	32.1	-1.65	1006.3	320.84	-685.4	0.1935	0.74897
MSMEG_0678	dcd	deoxycytidine triphosphate deaminase	3	41.2	8.9	-2.21	123.6	26.74	-96.8	0.1936	0.74897
MSMEG_1969	-	MerR-family protein transcriptional regulator	6	185.4	80.2	-1.21	1112.2	481.26	-630.9	0.1936	0.74897
MSMEG_2734	miaA	tRNA delta(2)-isopentenylpyrophosphate transferase	7	10.1	0	-3.47	70.6	0	-70.6	0.1936	0.74897
MSMEG_6592	-	short-chain dehydrogenase/reductase SDR	5	53	16	-1.72	264.8	80.21	-184.6	0.1936	0.74897
MSMEG_1663c	-	transcriptional regulator, AsnC family protein	8	35.3	3.3	-3.4	282.5	26.74	-255.7	0.1945	0.74968
MSMEG_4443c	-	hypothetical protein MSMEG_4443	3	41.2	8.9	-2.21	123.6	26.74	-96.8	0.1945	0.74968
MSMEG_1995c	-	transcriptional regulator MdcY family protein	4	70.6	20.1	-1.82	282.5	80.21	-202.3	0.1947	0.74968
MSMEG_5839c	-	protease 2	42	68.1	34.4	-0.99	2860	1443.77	-1416.2	0.1947	0.74968
MSMEG_4796c	-	hypothetical protein MSMEG_4796	3	176.5	26.7	-2.72	529.6	80.21	-449.4	0.1948	0.74968
MSMEG_6938c	-	ParB-like partition proteins	7	10.1	0	-3.47	70.6	0	-70.6	0.1948	0.74968
MSMEG_1160	-	ABC-type nitrate/sulfonate/bicarbonate transport system ATPase component	7	10.1	0	-3.47	70.6	0	-70.6	0.1949	0.74968
MSMEG_1845c	-	YghA protein	6	50	8.9	-2.49	300.1	53.47	-246.6	0.1949	0.74968
MSMEG_5229c	-	hypothetical protein MSMEG_5229	3	123.6	8.9	-3.79	370.7	26.74	-344	0.1949	0.74968
MSMEG_6633c	mdcC	malonate decarboxylase acyl carrier protein	3	100	8.9	-3.49	300.1	26.74	-273.4	0.1949	0.74968
MSMEG_2635c	-	ABC transporter permease protein	7	80.7	7.6	-3.4	564.9	53.47	-511.5	0.1954	0.75118
MSMEG_6059c	-	hypothetical protein MSMEG_6059	3	217.7	8.9	-4.61	653.2	26.74	-626.5	0.1958	0.75185
MSMEG_6338c	-	phosphoglycerate mutase family protein, putative	4	233.9	93.6	-1.32	935.7	374.31	-561.4	0.1958	0.75185
MSMEG_0277c	-	putative aminotransferase	13	89.6	341.4	1.93	1165.2	4438.26	3273.1	0.196	0.75219
MSMEG_5549	-	hypothetical protein MSMEG_5549	11	226.3	87.5	-1.37	2489.2	962.51	-1526.7	0.1962	0.75244
MSMEG_4861c	-	cyclase	7	35.3	0	-5.18	247.2	0	-247.2	0.1964	0.75244
MSMEG_6116	-	putative OHCU decarboxylase	7	211.8	49.7	-2.09	1482.9	347.57	-1135.4	0.1964	0.75244
MSMEG_3715	-	linear gramicidin synthetase subunit C	95	128.4	220.4	0.78	12198.9	20934.7	8735.7	0.1972	0.75502
MSMEG_4698c	-	hypothetical protein MSMEG_4698	8	216.3	56.8	-1.93	1730.1	454.52	-1275.6	0.1973	0.75502
MSMEG_1052c	-	amino acid carrier protein	23	444.4	725.4	0.71	10221.7	16683.6	6461.9	0.1977	0.7556
MSMEG_0983c	-	two-component system response regulator	3	141.2	8.9	-3.99	423.7	26.74	-397	0.1979	0.7556
MSMEG_1289c	-	hypothetical protein MSMEG_1289	10	130.6	50.8	-1.36	1306.4	507.99	-798.4	0.1979	0.7556
MSMEG_3955c	-	hypothetical protein MSMEG_3955	9	88.3	445.6	2.34	794.4	4010.47	3216	0.1979	0.7556
MSMEG_2970	-	polysaccharide deacetylase	13	46.2	18.5	-1.32	600.2	240.63	-359.6	0.1986	0.75774
MSMEG_1715	araA	L-arabinose isomerase	11	78.6	26.7	-1.56	865	294.1	-570.9	0.1988	0.75774
MSMEG_3372c	-	transcriptional regulator, ArsR family protein	3	53	8.9	-2.57	158.9	26.74	-132.1	0.1988	0.75774
MSMEG_5328	-	hypothetical protein MSMEG_5328	3	70.6	8.9	-2.99	211.8	26.74	-185.1	0.1991	0.75845
MSMEG_1254	-	DEAD/DEAH box helicase	102	233.7	168	-0.48	23832.9	17138.1	-6694.8	0.1997	0.75988
MSMEG_2993c	-	acyl-CoA dehydrogenase domain-containing protein	8	39.7	3.3	-3.57	317.8	26.74	-291	0.1997	0.75988
MSMEG_3618c	-	alanine and proline-rich secreted protein apa	9	176.5	53.5	-1.72	1588.9	481.26	-1107.6	0.2001	0.76011
MSMEG_4655	-	transcriptional regulator, AraC family protein	9	109.8	26.7	-2.04	988.6	240.63	-748	0.2001	0.76011
MSMEG_6540	-	virulence factor Mce family protein	15	361.3	167.5	-1.11	5419.8	2513.23	-2906.6	0.2001	0.76011
MSMEG_1931	-	hypothetical protein MSMEG_1931	8	11	0	-3.59	88.3	0	-88.3	0.2008	0.76191
MSMEG_4580c	-	hypothetical protein MSMEG_4580	3	206	35.6	-2.53	617.9	106.95	-510.9	0.2008	0.76191
MSMEG_4473c	-	integral membrane protein	3	370.7	80.2	-2.21	1112.2	240.63	-871.6	0.2011	0.76261
MSMEG_3412c	-	polysaccharide deacetylase family protein	14	39.1	11.5	-1.77	547.3	160.42	-386.9	0.2014	0.76263
MSMEG_3526	-	hypothetical protein MSMEG_3526	3	76.5	8.9	-3.1	229.5	26.74	-202.8	0.2014	0.76263
MSMEG_2926c	-	glycine betaine/carnitine/choline transport ATP-binding protein opuCA	8	72.8	23.4	-1.64	582.6	187.16	-395.4	0.2016	0.76263
MSMEG_2520	tsf	elongation factor Ts	8	6.6	0	-2.93	53	0	-53	0.2017	0.76263
MSMEG_3720c	-	recombination activating protein 1	5	49.4	10.7	-2.21	247.2	53.47	-193.7	0.2017	0.76263
MSMEG_1113	-	glycosyl transferase	8	26.5	3.3	-2.99	211.8	26.74	-185.1	0.2019	0.76263
MSMEG_3080	-	hypothetical protein MSMEG_3080	7	37.8	3.8	-3.31	264.8	26.74	-238.1	0.2019	0.76263
MSMEG_4557c	-	ABC transporter, ATP-binding protein	4	88.3	33.4	-1.4	353.1	133.68	-219.4	0.2022	0.76323
MSMEG_1295	-	transthyretin	9	31.4	329.8	3.39	282.5	2967.75	2685.3	0.2023	0.76323
MSMEG_6835c	-	Fatty acid desaturase	19	40	14.1	-1.51	759.1	267.36	-491.8	0.2024	0.76323
MSMEG_1532c	-	antibiotic biosynthesis monooxygenase	3	241.3	17.8	-3.76	723.8	53.47	-670.3	0.2027	0.76388
MSMEG_1900c	-	D-alanyl-D-alanine carboxypeptidase family protein	3	200.1	62.4	-1.68	600.2	187.16	-413.1	0.2028	0.76388
MSMEG_5297	-	putative oxalyl-CoA decarboxylase	12	48.5	15.6	-1.64	582.6	187.16	-395.4	0.2032	0.76496
MSMEG_6404c	glf	UDP-galactopyranose mutase	30	3.5	0.9	-1.99	105.9	26.74	-79.2	0.2037	0.76626
MSMEG_3480	-	streptomycin 6-kinase (streptidine kinase) (Streptomycin6-phosphotransferase) (APH(6))	10	113	34.8	-1.7	1129.9	347.57	-782.3	0.2038	0.76626
MSMEG_4041	-	hydroxyquinol 1,2-dioxygenase	17	71.7	28.3	-1.34	1218.1	481.26	-736.9	0.2039	0.76626
MSMEG_3147	moxR	ATPase, MoxR family protein	9	5.9	0	-2.78	53	0	-53	0.204	0.76626
MSMEG_6297	-	aldehyde dehydrogenase	16	87.2	36.8	-1.25	1394.7	588.2	-806.5	0.2043	0.76695
MSMEG_2363c	-	amino acid-binding ACT	3	188.3	26.7	-2.82	564.9	80.21	-484.7	0.2045	0.76722
MSMEG_2666	-	multimeric flavodoxin WrbA	8	132.4	46.8	-1.5	1059.2	374.31	-684.9	0.2046	0.76722
MSMEG_0840c	-	hypothetical protein MSMEG_0840	9	9.8	0	-3.43	88.3	0	-88.3	0.205	0.76818
MSMEG_0488c	-	ABC transporter ATP-binding protein	14	103.4	305.6	1.56	1447.6	4277.84	2830.2	0.2052	0.76818
MSMEG_4028c	-	hypothetical protein MSMEG_4028	3	123.6	8.9	-3.79	370.7	26.74	-344	0.2052	0.76818
MSMEG_3183	ilvA	threonine dehydratase	16	210.7	392.7	0.9	3371.9	6283.08	2911.2	0.206	0.77075
MSMEG_5504	-	hypothetical protein MSMEG_5504	15	121.2	385	1.67	1818.4	5775.08	3956.7	0.2064	0.77182
MSMEG_3383c	-	hypothetical protein MSMEG_3383	3	88.3	8.9	-3.31	264.8	26.74	-238.1	0.2066	0.77213
MSMEG_4012	hydA	dihydropyrimidinase	18	85.3	40.1	-1.09	1535.9	721.89	-814	0.2068	0.77245
MSMEG_4639c	-	hypothetical protein MSMEG_4639	5	42.4	5.3	-2.99	211.8	26.74	-185.1	0.207	0.77277
MSMEG_1047	-	nudix hydrolase	6	270.7	115.9	-1.22	1624.2	695.15	-929	0.2073	0.77303
MSMEG_3820	-	hypothetical protein MSMEG_3820	10	19.4	0	-4.35	194.2	0	-194.2	0.2073	0.77303
MSMEG_4799c	-	aldehyde dehydrogenase (NAD) family protein	15	243.6	115.9	-1.07	3654.4	1737.87	-1916.5	0.2076	0.77372
MSMEG_0573c	-	putative ECF sigma factor RpoE1	9	17.7	0	-4.22	158.9	0	-158.9	0.2078	0.77392
MSMEG_4342	-	metallo-beta-lactamase family protein	3	141.2	17.8	-2.99	423.7	53.47	-370.2	0.208	0.77392
MSMEG_6304	ligC	ATP-dependent DNA ligase	10	180.1	58.8	-1.61	1800.7	588.2	-1212.5	0.208	0.77392
MSMEG_1564c	-	lignostilbene-alpha,beta-dioxygenase	25	50.1	233.1	2.22	1253.4	5828.56	4575.1	0.2084	0.77455
MSMEG_3379	-	2-deoxy-D-gluconate 3-dehydrogenase	8	37.5	13.4	-1.49	300.1	106.95	-193.2	0.2084	0.77455
MSMEG_1947c	-	hypothetical protein MSMEG_1947	5	229.5	74.9	-1.62	1147.5	374.31	-773.2	0.2087	0.77524
MSMEG_4878	-	2Fe-2S iron-sulfur cluster binding domain-containing protein	10	17.7	0	-4.22	176.5	0	-176.5	0.209	0.77586
MSMEG_6520	-	orotate phosphoribosyltransferase	7	166.5	64.9	-1.36	1165.2	454.52	-710.6	0.2091	0.77586
MSMEG_3630	-	transcriptional repressor, CopY family protein	5	162.4	53.5	-1.6	812.1	267.36	-544.7	0.2095	0.77638
MSMEG_3875c	cobK	cobalt-precorrin-6x reductase	5	45.9	5.3	-3.1	229.5	26.74	-202.8	0.2095	0.77638
MSMEG_2950	-	carbon monoxide dehydrogenase, medium chain	9	17.7	0	-4.22	158.9	0	-158.9	0.2097	0.77638
MSMEG_4288c	-	integral membrane protein	5	70.6	427.8	2.6	353.1	2138.92	1785.8	0.2097	0.77638
MSMEG_2131c	-	acyl-CoA synthetase	10	37.1	0	-5.25	370.7	0	-370.7	0.2106	0.77842
MSMEG_4220c	-	hypothetical protein MSMEG_4220	11	122	527.4	2.11	1341.7	5801.82	4460.1	0.2106	0.77842
MSMEG_4324	-	hypothetical protein MSMEG_4324	12	11.8	0	-3.67	141.2	0	-141.2	0.2106	0.77842
MSMEG_6110c	hpt	hypoxanthine phosphoribosyltransferase	10	12.4	0	-3.74	123.6	0	-123.6	0.2109	0.77855
MSMEG_0097	-	oxidoreductase, zinc-binding dehydrogenase family protein	8	121.4	16.7	-2.86	971	133.68	-837.3	0.211	0.77855
MSMEG_6804c	-	sugar ABC transporter substrate-binding protein	5	307.2	85.6	-1.84	1535.9	427.78	-1108.1	0.211	0.77855
MSMEG_6492	-	GAF domain-containing protein	17	114.2	58.2	-0.97	1941.9	989.25	-952.7	0.2111	0.77855
MSMEG_5188c	-	caax amino protease family protein	9	49	0	-5.64	441.4	0	-441.4	0.2124	0.78286
MSMEG_3019	-	hypothetical protein MSMEG_3019	12	123.6	51.2	-1.27	1482.9	614.94	-868	0.2125	0.78286
MSMEG_4520	-	sulfate/thiosulfate import ATP-binding protein CysA	9	15.7	0	-4.06	141.2	0	-141.2	0.2127	0.78317
MSMEG_4942c	atpB	F0F1 ATP synthase subunit A	6	409	240.6	-0.77	2453.9	1443.77	-1010.1	0.213	0.78378
MSMEG_4329	-	propionyl-CoA carboxylase beta chain	8	86.1	40.1	-1.1	688.5	320.84	-367.7	0.2131	0.78378
MSMEG_1125	-	regulatory protein, ArsR	5	74.1	26.7	-1.47	370.7	133.68	-237.1	0.2136	0.78519
MSMEG_1571c	-	integral membrane protein	10	254.2	56.1	-2.18	2542.2	561.47	-1980.7	0.2142	0.7861
MSMEG_3125	-	cysteine desulfurase	11	1.6	99.7	5.96	17.7	1096.2	1078.5	0.2142	0.7861
MSMEG_3158	mutA	methylmalonyl-CoA mutase, small subunit	11	65.8	4.9	-3.76	723.8	53.47	-670.3	0.2142	0.7861
MSMEG_6295	-	shikimate transporter	18	180.5	325.3	0.85	3248.3	5855.29	2607	0.2146	0.78714
MSMEG_4823c	-	cytochrome p450	13	172.5	63.8	-1.44	2242.1	828.83	-1413.2	0.2151	0.78854
MSMEG_1756c	-	endonuclease VIII and DNA n-glycosylase with an AP lyase activity	6	100	22.3	-2.17	600.2	133.68	-466.6	0.2153	0.78878
MSMEG_6878c	-	inner-membrane translocator	14	194.2	106.9	-0.86	2718.7	1497.24	-1221.5	0.2154	0.78878
MSMEG_6803c	-	ribose transport system permease protein RbsC	8	61.8	16.7	-1.89	494.3	133.68	-360.6	0.2157	0.78939
MSMEG_3666c	-	C-5 sterol desaturase	16	225.1	573.2	1.35	3601.4	9170.62	5569.2	0.2158	0.78939
MSMEG_0309c	-	aldehyde dehydrogenase family protein	12	166.2	91.3	-0.86	1994.9	1096.2	-898.7	0.2165	0.79152
MSMEG_4889c	-	integral membrane transport protein	18	182.4	86.2	-1.08	3283.6	1550.72	-1732.9	0.2169	0.79248
MSMEG_6089c	-	hypothetical protein MSMEG_6089	7	229.5	557.6	1.28	1606.5	3903.53	2297	0.217	0.79248
MSMEG_6162c	-	IS1096, tnpR protein	10	257.7	457.2	0.83	2577.5	4571.94	1994.5	0.2175	0.79381
MSMEG_4144	-	transcriptional regulator, LysR family protein	11	24.1	0	-4.65	264.8	0	-264.8	0.2176	0.79381
MSMEG_2488	-	[NADP+] succinate-semialdehyde dehydrogenase [Mycobacterium smegmatis str. MC2 155]	12	53	334.2	2.66	635.5	4010.47	3374.9	0.2178	0.79411
MSMEG_1205c	-	cyclopropane-fatty-acyl-phospholipid synthase 1	13	65.2	281.8	2.11	847.4	3662.9	2815.5	0.218	0.79434
MSMEG_5278	-	membrane-spanning protein	18	136.3	55	-1.31	2453.9	989.25	-1464.7	0.2181	0.79434
MSMEG_2597	-	aldehyde dehydrogenase	8	88.3	6.7	-3.72	706.2	53.47	-652.7	0.2183	0.79457
MSMEG_5036c	-	rhomboid family protein	8	302.3	160.4	-0.91	2418.6	1283.35	-1135.2	0.2184	0.79457
MSMEG_3200	nadB	L-aspartate oxidase	12	206	543.6	1.4	2471.6	6523.71	4052.1	0.2186	0.79487
MSMEG_2275	hypD	hydrogenase expression/formation protein HypD	8	17.7	3.3	-2.4	141.2	26.74	-114.5	0.2189	0.79553
MSMEG_3046	carA	carbamoyl phosphate synthase small subunit	8	110.3	40.1	-1.46	882.7	320.84	-561.9	0.2192	0.79619
MSMEG_0046	-	hypothetical protein MSMEG_0046	14	200.5	95.5	-1.07	2807	1336.82	-1470.2	0.2195	0.79684
MSMEG_6875c	-	endoribonuclease L-PSP family protein	11	141.2	46.2	-1.61	1553.6	507.99	-1045.6	0.2204	0.79961
MSMEG_1857	-	transposase IstA protein, putative	15	77.7	32.1	-1.28	1165.2	481.26	-683.9	0.2205	0.79961
MSMEG_2045	-	monoxygenase	19	116.1	66.1	-0.81	2206.8	1256.62	-950.1	0.2208	0.80027
MSMEG_2332c	-	amino acid carrier protein	23	422.9	668.4	0.66	9727.4	15373.5	5646.1	0.222	0.80375
MSMEG_4011	-	putative pyrimidine permease RutG	12	22.1	0	-4.53	264.8	0	-264.8	0.222	0.80375
MSMEG_0783	pta	phosphate acetyltransferase	22	128.4	63.2	-1.02	2824.6	1390.3	-1434.3	0.223	0.80635
MSMEG_1897	pcaD	3-oxoadipate enol-lactonase	6	35.3	8.9	-1.99	211.8	53.47	-158.4	0.223	0.80635
MSMEG_0865	-	membrane flanked domain-containing protein	10	81.2	224.6	1.47	812.1	2245.87	1433.8	0.2231	0.80635
MSMEG_1311c	-	oligopeptide transporter, OPT family protein	14	232	128	-0.86	3248.3	1791.35	-1457	0.2232	0.80635
MSMEG_3364	-	RhtB family protein transporter	10	113	53.5	-1.08	1129.9	534.73	-595.1	0.2241	0.8091
MSMEG_5178c	-	integral membrane protein	12	204.5	100.3	-1.03	2453.9	1203.14	-1250.8	0.2242	0.8091
MSMEG_1242	iscS	cysteine desulfurase IscS	24	354.6	632.8	0.84	8509.2	15186.3	6677.1	0.2246	0.8101
MSMEG_3508	-	hydrolase, alpha/beta hydrolase fold family protein	8	200.8	481.3	1.26	1606.5	3850.06	2243.5	0.2248	0.81032
MSMEG_4019c	-	AMP-dependent synthetase and ligase	28	106.6	53.5	-0.99	2983.5	1497.24	-1486.3	0.2249	0.81032
MSMEG_0886c	-	serine/threonine-protein kinase PknD	10	121.8	37.4	-1.7	1218.1	374.31	-843.8	0.2253	0.81089
MSMEG_3335	-	transcriptional regulator, IclR family protein, putative	15	98.9	37.4	-1.4	1482.9	561.47	-921.5	0.2253	0.81089
MSMEG_4066c	-	hypothetical protein MSMEG_4066	19	112.4	296.9	1.4	2136.1	5641.4	3505.3	0.2258	0.81174
MSMEG_3172	-	DNA polymerase IV	12	35.3	193.8	2.46	423.7	2326.08	1902.4	0.2259	0.81174
MSMEG_6572	-	methyltransferase	11	113.9	51	-1.16	1253.4	561.47	-692	0.2259	0.81174
MSMEG_3798c	-	hypothetical protein MSMEG_3798	8	94.9	284.1	1.58	759.1	2272.6	1513.5	0.2265	0.81339
MSMEG_3176	rarD	RarD protein	10	413.1	903.7	1.13	4131	9036.94	4905.9	0.2266	0.81339
MSMEG_5135	-	hypothetical protein MSMEG_5135	5	444.9	1064.1	1.26	2224.4	5320.56	3096.2	0.2272	0.8151
MSMEG_3824	-	hypothetical protein MSMEG_3824	12	207.4	414.4	1	2489.2	4972.99	2483.8	0.2275	0.81567
MSMEG_0337	-	hypothetical protein MSMEG_0337	18	82.4	227.3	1.46	1482.9	4090.68	2607.7	0.2276	0.81567
MSMEG_3586c	-	major facilitator family protein transporter	21	53.8	21.6	-1.31	1129.9	454.52	-675.3	0.2284	0.8181
MSMEG_3606	-	transcriptional regulator	8	273.6	127	-1.11	2189.1	1015.99	-1173.1	0.2292	0.82009
MSMEG_5774	-	tRNA-dihydrouridine synthase, putative	6	765	374.3	-1.03	4590	2245.87	-2344.2	0.2292	0.82009
MSMEG_6398c	-	antigen 85-A	15	76.5	33.9	-1.18	1147.5	507.99	-639.5	0.2298	0.8218
MSMEG_2142	-	gp36 protein	9	260.9	106.9	-1.29	2348	962.51	-1385.5	0.2302	0.82263
MSMEG_6094c	lysS	lysyl-tRNA synthetase	18	3.9	0	-2.3	70.6	0	-70.6	0.2303	0.82263
MSMEG_2652c	-	iron repressor protein	5	74.1	165.8	1.16	370.7	828.83	458.1	0.2304	0.82263
MSMEG_6844c	-	trap-t family protein transporter, dctp	15	50.6	249.5	2.3	759.1	3743.11	2984	0.2307	0.82318
MSMEG_4713c	-	HpcH/HpaI aldolase/citrate lyase family protein	8	236.1	76.9	-1.62	1889	614.94	-1274	0.2308	0.82318
MSMEG_3990	-	putative transporter	20	144.8	73.5	-0.98	2895.3	1470.51	-1424.8	0.231	0.8233
MSMEG_6091c	-	negative regulator of genetic competence ClpC/mecB	19	2.8	0	-1.92	53	0	-53	0.2311	0.8233
MSMEG_0433c	-	nitrite extrusion protein	17	281.4	160.4	-0.81	4784.2	2727.12	-2057.1	0.2312	0.8233
MSMEG_4565	-	oxidoreductase	15	214.2	509.8	1.25	3213	7646.64	4433.6	0.2314	0.82357
MSMEG_3214	-	hypothetical protein MSMEG_3214	7	330.4	168.1	-0.98	2312.7	1176.41	-1136.3	0.2321	0.82563
MSMEG_3423	-	IclR family protein regulator	8	33.1	6.7	-2.31	264.8	53.47	-211.3	0.2324	0.82626
MSMEG_5109c	-	hypothetical protein MSMEG_5109	14	107.2	45.8	-1.23	1500.6	641.68	-858.9	0.2329	0.8276
MSMEG_0757	-	hypothetical protein MSMEG_0757	5	151.8	64.2	-1.24	759.1	320.84	-438.3	0.2333	0.82858
MSMEG_1740	-	dehydrogenase/reductase SDR family protein member 4	8	236.1	120.3	-0.97	1889	962.51	-926.5	0.234	0.83063
MSMEG_4050c	-	hypothetical protein MSMEG_4050	4	233.9	521.4	1.16	935.7	2085.45	1149.8	0.2343	0.83125
MSMEG_4310c	cobD	cobalamin biosynthesis protein	8	37.5	163.8	2.13	300.1	1310.09	1010	0.2355	0.83507
MSMEG_6386	-	membrane protein	28	1.9	0	-1.53	53	0	-53	0.2359	0.83604
MSMEG_1245	-	phosphoadenosine phosphosulfate reductase	21	270.7	635.3	1.23	5684.6	13341.5	7656.9	0.237	0.83941
MSMEG_5519c	-	monooxygenase	16	113.6	265.7	1.23	1818.4	4251.1	2432.7	0.2371	0.83941
MSMEG_0247c	-	secreted peptidase	15	210.7	98	-1.1	3160.1	1470.51	-1689.6	0.2378	0.841
MSMEG_6359	-	trypsin domain-containing protein	9	204	98	-1.06	1836	882.3	-953.7	0.2378	0.841
MSMEG_1846c	-	polysulphide reductase, NrfD	11	163.7	85.1	-0.94	1800.7	935.78	-864.9	0.2385	0.84303
MSMEG_1382	-	MmpL5 protein	29	82.8	190.8	1.2	2400.9	5534.46	3133.5	0.2387	0.84321
MSMEG_6231	-	hypothetical protein MSMEG_6231	5	278.9	69.5	-2	1394.7	347.57	-1047.1	0.2388	0.84321
MSMEG_3860c	-	polyprenol-monophosphomannose synthase Ppm1	14	170.2	85.9	-0.99	2383.3	1203.14	-1180.2	0.2392	0.84418
MSMEG_5562	rnhA	RNase H	5	314.2	155.1	-1.02	1571.2	775.36	-795.8	0.2398	0.84585
MSMEG_0895	-	GntR family transcriptional regulator	7	184.1	485.1	1.4	1288.7	3395.54	2106.8	0.2402	0.84682
MSMEG_4357	-	ABC transporter, ATP-binding protein	13	23.1	4.1	-2.49	300.1	53.47	-246.6	0.2409	0.84873
MSMEG_2881c	-	aldehyde dehydrogenase	14	87	42	-1.05	1218.1	588.2	-629.9	0.2411	0.84873
MSMEG_4377c	-	amino acid permease family protein, putative	16	118.1	51.8	-1.19	1889	828.83	-1060.1	0.2413	0.84873
MSMEG_6738c	-	transcriptional regulator YdhC	5	95.3	21.4	-2.16	476.7	106.95	-369.7	0.2414	0.84873
MSMEG_1034	-	putative esterase family protein	13	199.6	117.2	-0.77	2595.1	1523.98	-1071.2	0.2415	0.84873
MSMEG_3108c	-	ABC transporter, ATPase subunit	7	103.4	45.8	-1.17	723.8	320.84	-403	0.2415	0.84873
MSMEG_0312c	eda	2-dehydro-3-deoxyphosphogluconate aldolase/4-hydroxy-2-oxoglutarate aldolase	7	146.3	53.5	-1.45	1023.9	374.31	-649.6	0.2417	0.84898
MSMEG_4046c	-	L-carnitine dehydratase/bile acid-inducible protein F	15	110.6	58.8	-0.91	1659.5	882.3	-777.2	0.242	0.84959
MSMEG_5556	-	MFS permease	8	514.2	1032.7	1.01	4113.4	8261.58	4148.2	0.2424	0.85055
MSMEG_5726	-	hypothetical protein MSMEG_5726	11	94.7	31.6	-1.58	1041.6	347.57	-694	0.2426	0.85072
MSMEG_3642c	gcvP	glycine dehydrogenase	29	109	50.7	-1.1	3160.1	1470.51	-1689.6	0.2427	0.85072
MSMEG_2465	-	adenine deaminase	7	100.9	38.2	-1.4	706.2	267.36	-438.8	0.243	0.85123
MSMEG_0691c	-	putative transcriptional regulatory protein	8	57.4	13.4	-2.1	459	106.95	-352.1	0.2431	0.85123
MSMEG_3203c	-	transporter, LysE family protein	7	262.3	1065.6	2.02	1836	7459.48	5623.5	0.2434	0.85184
MSMEG_3325c	-	hypothetical protein MSMEG_3325	10	67.1	24.1	-1.48	670.9	240.63	-430.2	0.2437	0.85244
MSMEG_3836c	-	hypothetical protein MSMEG_3836	7	191.7	61.1	-1.65	1341.7	427.78	-913.9	0.244	0.85305
MSMEG_5708c	-	hypothetical protein MSMEG_5708	9	180.5	445.6	1.3	1624.2	4010.47	2386.3	0.2447	0.85505
MSMEG_4774c	-	AMP-dependent synthetase and ligase	12	53	178.2	1.75	635.5	2138.92	1503.4	0.2451	0.85556
MSMEG_6441	-	transcriptional regulator, TetR family protein	6	270.7	779.8	1.53	1624.2	4678.89	3054.7	0.2451	0.85556
MSMEG_2736	-	GTP-binding protein	9	184.4	77.2	-1.26	1659.5	695.15	-964.3	0.2454	0.85616
MSMEG_4339c	-	TPR repeat-containing protein	24	91.2	212.8	1.22	2189.1	5106.67	2917.6	0.2458	0.85711
MSMEG_1849c	selB	selenocysteine-specific translation elongation factor	8	79.4	33.4	-1.25	635.5	267.36	-368.2	0.2462	0.85777
MSMEG_4658c	-	sugar ABC transporter substrate-binding protein	9	162.8	457.5	1.49	1465.3	4117.42	2652.1	0.2464	0.85777
MSMEG_6527c	-	transcriptional regulator, TetR family protein	7	47.9	7.6	-2.65	335.4	53.47	-282	0.2464	0.85777
MSMEG_6105c	-	cell division protein	24	97.8	42.3	-1.21	2348	1015.99	-1332	0.2465	0.85777
MSMEG_1274c	-	gluconolactonase	12	186.8	106.9	-0.8	2242.1	1283.35	-958.7	0.2471	0.85941
MSMEG_1567c	-	hypothetical protein MSMEG_1567	6	282.5	632.8	1.16	1694.8	3796.58	2101.8	0.2474	0.86001
MSMEG_5072c	-	RNA polymerase sigma factor SigE	10	137.7	66.8	-1.04	1377	668.41	-708.6	0.2477	0.86051
MSMEG_2445c	-	hypothetical protein MSMEG_2445	13	139.9	59.6	-1.23	1818.4	775.36	-1043	0.2478	0.86051
MSMEG_0688c	-	aminotransferase AlaT	18	241.3	135.2	-0.84	4342.9	2433.02	-1909.9	0.248	0.86076
MSMEG_1980c	-	hypothetical protein MSMEG_1980	20	105.9	49.5	-1.1	2118.5	989.25	-1129.2	0.2486	0.8624
MSMEG_3171c	-	hypothetical protein MSMEG_3171	7	126.1	45.8	-1.46	882.7	320.84	-561.9	0.2489	0.86299
MSMEG_4116c	-	3-hydroxybutyryl-CoA dehydrogenase	8	35.3	10	-1.82	282.5	80.21	-202.3	0.2495	0.86462
MSMEG_4695	-	hypothetical protein MSMEG_4695	6	117.7	49	-1.26	706.2	294.1	-412.1	0.25	0.86581
MSMEG_6141c	-	N-acyl-D-glutamate amidohydrolase	20	67.1	197.9	1.56	1341.7	3957	2615.3	0.2501	0.86581
MSMEG_1630c	-	2,5-dichloro-2,5-cyclohexadiene-1,4-diol dehydrogenase	6	329.5	151.5	-1.12	1977.3	909.04	-1068.2	0.2504	0.8663
MSMEG_4084c	-	putative acyl-CoA dehydrogenase	20	110.3	46.8	-1.24	2206.8	935.78	-1271	0.2505	0.8663
MSMEG_3259	-	acyl-CoA dehydrogenase	10	204.8	106.9	-0.94	2047.9	1069.46	-978.4	0.251	0.86758
MSMEG_3470	-	NAD-dependent epimerase/dehydratase	6	44.1	8.9	-2.31	264.8	53.47	-211.3	0.2513	0.86817
MSMEG_2525	-	amino acid permease superfamily protein	23	97.5	256.9	1.4	2242.1	5908.77	3666.7	0.2515	0.86842
MSMEG_2726c	-	glutamate permease	7	146.3	53.5	-1.45	1023.9	374.31	-649.6	0.2517	0.86866
MSMEG_3338	-	oxidoreductase, FAD/FMN-binding	24	57.4	119.2	1.05	1377	2860.81	1483.8	0.252	0.86925
MSMEG_6579	-	hypothetical protein MSMEG_6579	5	324.8	684.5	1.08	1624.2	3422.27	1798.1	0.2523	0.86974
MSMEG_3215c	-	ABC-type molybdenum transport system, ATPase component/photorepair protein PhrA	4	61.8	6.7	-3.21	247.2	26.74	-220.4	0.2524	0.86974
MSMEG_5968c	-	polysaccharide biosynthesis protein	25	243.6	141.2	-0.79	6090.6	3529.22	-2561.4	0.2527	0.87032
MSMEG_5578c	-	hypothetical protein MSMEG_5578	12	200.1	100.3	-1	2400.9	1203.14	-1197.8	0.253	0.8704
MSMEG_2313	nrdF2	ribonucleotide-diphosphate reductase subunit beta	18	286.4	435.2	0.6	5155	7833.79	2678.8	0.2531	0.8704
MSMEG_3435	-	hypothetical protein MSMEG_3435	4	53	6.7	-2.99	211.8	26.74	-185.1	0.2534	0.8704
MSMEG_0428	-	nitrite reductase	4	79.4	6.7	-3.57	317.8	26.74	-291	0.2535	0.8704
MSMEG_1290	ilvD	dihydroxy-acid dehydratase	18	54.9	22.3	-1.3	988.6	401.05	-587.6	0.2535	0.8704
MSMEG_2474	-	cutinase Cut3	8	53	13.4	-1.99	423.7	106.95	-316.8	0.2535	0.8704
MSMEG_3140	-	ABC transporter ATP-binding protein	12	153	363.2	1.25	1836	4358.05	2522	0.2538	0.87099
MSMEG_3496	-	MmpL4 protein	30	298.4	475.9	0.67	8950.6	14277.3	5326.7	0.2541	0.87113
MSMEG_3655	-	ABC transporter, permease/ATP-binding protein	18	265.8	164.9	-0.69	4784.2	2967.75	-1816.5	0.2541	0.87113
MSMEG_0123	-	hypothetical protein MSMEG_0123	4	75	13.4	-2.49	300.1	53.47	-246.6	0.2545	0.87161
MSMEG_2043	-	transcriptional regulator, TetR family protein	4	22.1	6.7	-1.72	88.3	26.74	-61.5	0.2545	0.87161
MSMEG_5055c	-	NAD-dependent malic enzyme	4	242.7	73.5	-1.72	971	294.1	-676.9	0.2556	0.87482
MSMEG_4767	-	major facilitator superfamily protein permease	9	315.8	579.3	0.88	2842.3	5213.62	2371.3	0.2557	0.87482
MSMEG_5424c	-	transcriptional regulator, TetR family protein	9	229.5	127.7	-0.85	2065.5	1149.67	-915.9	0.2559	0.87506
MSMEG_2917c	-	hypothetical protein MSMEG_2917	6	291.3	864.5	1.57	1747.7	5186.88	3439.1	0.2561	0.8753
MSMEG_5822	-	hypothetical protein MSMEG_5822	8	244.9	113.6	-1.11	1959.6	909.04	-1050.6	0.2566	0.87656
MSMEG_4264c	-	hypothetical protein MSMEG_4264	5	204.8	85.6	-1.26	1023.9	427.78	-596.1	0.2573	0.87851
MSMEG_6764	-	transcriptional regulator, TetR family protein	4	75	13.4	-2.49	300.1	53.47	-246.6	0.2583	0.88137
MSMEG_4716c	-	acetyl-/propionyl-coenzyme A carboxylase alpha chain	14	88.3	36.3	-1.28	1235.8	507.99	-727.8	0.2584	0.88137
MSMEG_5462	rarD	RarD protein	11	160.5	85.1	-0.92	1765.4	935.78	-829.6	0.259	0.88275
MSMEG_1968c	-	putative oxidoreductase	6	258.9	748.6	1.53	1553.6	4491.73	2938.2	0.2591	0.88275
MSMEG_6743	-	lactoylglutathione lyase	4	57.4	6.7	-3.1	229.5	26.74	-202.8	0.2592	0.88275
MSMEG_2743	nrdR	transcriptional regulator NrdR	4	39.7	6.7	-2.57	158.9	26.74	-132.1	0.2598	0.88424
MSMEG_3159	-	methylmalonyl-CoA mutase	25	184.3	102.7	-0.84	4607.7	2566.7	-2041	0.2599	0.88424
MSMEG_2179	-	transcriptional regulatory protein	12	85.3	40.1	-1.09	1023.9	481.26	-542.7	0.2618	0.89003
MSMEG_1838	-	cationic amino acid transporter	19	169.1	372.9	1.14	3213	7085.17	3872.1	0.2619	0.89003
MSMEG_1861c	-	hypothetical protein MSMEG_1861	12	98.6	44.6	-1.15	1182.8	534.73	-648.1	0.262	0.89003
MSMEG_6617c	-	nudix hydrolase	5	183.6	74.9	-1.29	918	374.31	-543.7	0.2624	0.89094
MSMEG_3726c	-	alcohol dehydrogenase	29	84	168.7	1.01	2436.3	4892.78	2456.5	0.2627	0.89106
MSMEG_4707c	-	non-heme bromoperoxidase BPO-A2	11	195.8	85.1	-1.2	2153.8	935.78	-1218	0.2629	0.89106
MSMEG_0982	-	immunogenic protein	9	143.2	386.2	1.43	1288.7	3475.74	2187	0.263	0.89106
MSMEG_1808c	-	Fe-S metabolism associated SufE	4	211.8	26.7	-2.99	847.4	106.95	-740.4	0.263	0.89106
MSMEG_3970c	-	glutamyl-tRNA(Gln) amidotransferase subunit A	14	47.9	160.4	1.74	670.9	2245.87	1575	0.2631	0.89106
MSMEG_3536	-	sugar transport protein	15	105.9	55.3	-0.94	1588.9	828.83	-760	0.2638	0.89298
MSMEG_3863c	-	pyridoxamine 5'-phosphate oxidase family protein	4	344.3	100.3	-1.78	1377	401.05	-976	0.2642	0.89389
MSMEG_3425c	-	TetR-family protein transcriptional regulator	6	123.6	57.9	-1.09	741.5	347.57	-393.9	0.2645	0.89445
MSMEG_4349c	-	hypothetical protein MSMEG_4349	8	97.1	36.8	-1.4	776.8	294.1	-482.7	0.2659	0.89873
MSMEG_5029c	-	alkanal monooxygenase alpha chain	7	100.9	38.2	-1.4	706.2	267.36	-438.8	0.2661	0.89896
MSMEG_3533	-	di-/tripeptide transporter	23	95.9	37.2	-1.37	2206.8	855.57	-1351.2	0.2663	0.89918
MSMEG_6788c	-	dihydroxyacetone kinase	9	143.2	35.6	-2.01	1288.7	320.84	-967.9	0.2665	0.8994
MSMEG_4465c	-	cutinase	7	252.2	80.2	-1.65	1765.4	561.47	-1203.9	0.2671	0.90098
MSMEG_6570c	-	integral membrane protein	16	130.2	294.1	1.18	2083.2	4705.62	2622.4	0.2676	0.90207
MSMEG_4868	-	transcriptional regulator	7	171.5	53.5	-1.68	1200.5	374.31	-826.2	0.2678	0.90207
MSMEG_4053c	-	transcriptional regulatory protein	36	119.2	222.8	0.9	4289.9	8020.95	3731	0.268	0.90207
MSMEG_6423c	-	glycerophosphoryl diester phosphodiesterase family protein	9	166.7	86.2	-0.95	1500.6	775.36	-725.2	0.2683	0.90207
MSMEG_2081c	-	putative acyl-CoA dehydrogenase	12	107.4	410	1.93	1288.7	4919.52	3630.8	0.2684	0.90207
MSMEG_6850	-	alpha/beta hydrolase	6	61.8	17.8	-1.79	370.7	106.95	-263.8	0.2684	0.90207
MSMEG_3265	-	arabitol-phosphate dehydrogenase	14	59.3	24.8	-1.26	829.7	347.57	-482.2	0.2685	0.90207
MSMEG_5876	-	H-N-H endonuclease F-TflIV	5	462.5	246	-0.91	2312.7	1229.88	-1082.8	0.2685	0.90207
[truncated: 4,717 more rows]
