# Supplementary material for: Maturing Mycobacterium smegmatis peptidoglycan requires non-canonical crosslinks to maintain shape
Source: eLife. 2018 Oct 16;7:e37516. doi: 10.7554/eLife.37516 (PMC6231781; doi:10.7554/eLife.37516)
Supplement: Figure 3—source data 2. [file elife-37516-fig3-data2.xlsx]

## Sheet: reads per TA ponA2
TA site	normalized reads WT	normalized reads delta LDT
6267930	11	0	MSMEG_6201	ponA2
6267983	0	0	MSMEG_6201
6268121	2	0	MSMEG_6201
6268172	39	1.5	MSMEG_6201
6268184	43	0	MSMEG_6201
6268322	7	0	MSMEG_6201
6268345	0	0	MSMEG_6201
6268355	42	1.5	MSMEG_6201
6268360	4	0	MSMEG_6201
6268382	28	0	MSMEG_6201
6268469	11	3	MSMEG_6201
6268652	34	0	MSMEG_6201
6268664	3	3	MSMEG_6201
6268712	19	1.5	MSMEG_6201
6268870	12	0	MSMEG_6201
6268874	38	3	MSMEG_6201
6269105	0	0	MSMEG_6201
6269231	18	1.5	MSMEG_6201
6269258	31	0	MSMEG_6201
6269648	10	0	MSMEG_6201
6269663	75	7.6	MSMEG_6201
6269669	50	1.5	MSMEG_6201
6269746	0	0	MSMEG_6201
6269834	20	3	MSMEG_6201
6269945	36	1.5	MSMEG_6201

## Sheet: reads per TA pbpA
TA site	normalized reads WT	normalized reads delta LDT
51528	13	3	MSMEG_0031c	PbpA
51550	6	0	MSMEG_0031c
51577	0	0	MSMEG_0031c
51659	25	1.5	MSMEG_0031c
51664	0	0	MSMEG_0031c
51721	26	0	MSMEG_0031c
51724	5	0	MSMEG_0031c
51759	4	0	MSMEG_0031c
51773	16	0	MSMEG_0031c
52203	15	0	MSMEG_0031c
52314	7	0	MSMEG_0031c
52430	10	1.5	MSMEG_0031c
52572	3	0	MSMEG_0031c
52584	3	0	MSMEG_0031c
52605	4	0	MSMEG_0031c
52623	4	0	MSMEG_0031c
52635	5	0	MSMEG_0031c
52665	2	0	MSMEG_0031c
52713	1	0	MSMEG_0031c
52855	46	3	MSMEG_0031c
