# Supplementary material for: Maturing Mycobacterium smegmatis peptidoglycan requires non-canonical crosslinks to maintain shape
Source: eLife. 2018 Oct 16;7:e37516. doi: 10.7554/eLife.37516 (PMC6231781; doi:10.7554/eLife.37516)
Supplement: Figure 4—figure supplement 1—source data 1. [file elife-37516-fig4-figsupp1-data1.xlsx]

## Sheet: ldtEmRFP
length (um)	birth frame	15min post birth	30mini post birth	45min post birth	60min post birth	75min post birth	90min post birth		frame before division
0	159.077	143.345	158.075	195.184	223.518	195.693	224.575	178.577	186.3
0.10781	147.41	166.176	164.776	213.58	233.214	216.584	234.322	197.625	207.436
0.21562	174.537	162.069	176.921	195.834	245.041	219.445	268.576	242.223	219.714
0.32343	173.558	190.921	182.507	193.443	237.608	245.873	255.586	264.654	243.927
0.43124	180.083	162.487	184.961	196.641	191.49	235.979	233.417	247.92	260.399
0.53905	190.629	164.711	198.011	193.615	194.272	192.15	198.593	236.622	240.645
0.64686	157.141	170.091	185.974	181.686	197.104	182.674	197.905	214.226	206.169
0.75468	168.229	159.43	195.948	174.409	167.4	184.584	204.015	187.494	189.251
0.86249	169.741	141.841	193.974	162.092	179.527	169.062	194.864	180.537	175.073
0.9703	162.188	154.095	167.484	154.311	178.733	173.604	161.362	201.341	208.286
1.07811	178.346	164.126	184.245	156.831	167.08	177.165	172.857	197.245	175.246
1.18592	189.974	202.741	152.41	158.474	180.908	182.075	173.509	193.187	180.349
1.29373	204.665	224.338	157.748	203.167	208.864	195.182	173.21	192.168	156.164
1.40154	221.328	215.665	187.837	224.777	218.014	193.448	203.573	207.086	170.457
1.50935	230.501	223.841	220.111	235.834	231.761	200.865	243.971	230.655	185.71
1.61716	234.424	235.229	228.446	240.281	241.325	231.469	260.399	241.378	230.961
1.72497	228.066	234.497	225.143	254.713	270.762	246.695	275.087	258.987	243.951
1.83278	228.049	224.882	240.963	271.484	268.538	268.935	284.018	270.225	267.423
1.94059	229.684	214.25	244.086	244.239	273.657	271.112	275.414	287.613	299.242
2.0484	210.762	195.794	250.868	260.618	302.383	256.207	277.117	291.849	311.099
2.15621	187.515	208.737	261.377	270.69	297.792	281.931	289.106	273.781	280.988
2.26403	172.634	183.755	247.139	267.867	308.354	306.236	318.289	281.713	289.371
2.37184	138.238	150.953	218.335	231.384	262.372	280.442	300.374	301.897	311.188
2.47965	125.253	132.865	174.954	199.753	244.166	274.418	293.057	310.745	316.436
2.58746	107.493	128.434	161.668	161.074	193.126	257.821	288.492	278.208	326.819
2.69527	77.488	110.902	126.471	142.525	164.988	233.073	254.62	279.186	326.283
2.80308	67.971	91.455	120.837	144.511	141.884	193.536	237.147	266.558	296.258
2.91089		90.592	105.384	129.204	141.168	156.291	209.448	252.33	276.909
3.0187			95.715	110.05	138.068	125.993	195.518	199.286	244.869
3.12651			89.036	114.229	137.705	120.633	182.551	189.172	230.646
3.23432			88.001	113.825	128.166	108.152	160.096	175.986	207.032
3.34213			85.953	112.162	104.076	105.852	145.794	177.022	205.003
3.44994					99.54	98.548	144.833	147.574	194.473
3.55775					91.845	89.148	133.468	145.888	180.56
3.66557					82.886	75.587	98.435	136.087	163.751
3.77338					68.395	77.744	105.717	132.881	147.476
3.88119						70.475	95.76	118.33	142.113
3.989						57.841	95.67	106.861	135.765
4.09681						55.999	61.583	86.3	123.429
4.20462							66.662	81.667	109.175
4.31243							75.153	72.626	100.575
4.42024							51.463	60.429	82.749
4.52805								57.036	75.384
4.63586								47.93	79.885
4.74367									70.652
4.85148									70.484
4.95929									52.841

## Sheet: ponA1RFP
length (um)	birth frame	15min post birth	30mini post birth	45min post birth	60min post birth	75min post birth	90min post birth		frame before division
0	180.588	205.325	155.972	202.484	292.603	275.614	349.146	341.861	365.752
0.1078	240.922	234.458	211.272	278.371	370.319	328.105	387.657	393.534	451.219
0.2156	258.624	271.669	273.163	293.787	390.014	333.465	422.013	427.952	483.352
0.3234	262.512	313.029	296.104	316.724	434.606	381.359	467.853	466.152	514.582
0.4312	264.493	326.193	292.058	307.724	380.997	355.014	445.23	477.327	499.363
0.5391	252.233	300.866	291.131	291.701	383.115	348.446	423.897	476.43	521.743
0.6469	241.615	257.842	260.543	256.327	332.805	336.097	393.544	495.26	561.037
0.7547	238.623	227.944	230.989	246.146	304.628	328.223	363.897	453.727	534.843
0.8625	236.532	242.937	230.312	225.453	274.351	293.41	332.004	412.508	500.276
0.9703	213.367	204.362	221.19	202.338	251.638	270.581	312.467	383.744	469.109
1.0781	205.892	195.457	213.831	223.072	256.913	254.268	277.678	354.333	463.908
1.1859	207.184	193.143	211.194	213.519	223.304	222.899	232.956	305.672	432.023
1.2937	201.845	185.463	192.978	184.523	221.991	224.792	220.283	287.925	406.013
1.4015	200.099	171.44	170.67	175.19	209.988	211.535	205.264	235.06	348.88
1.5094	207.879	180.84	181.749	175.011	214.561	212.239	193.404	249.464	303.747
1.6172	201.432	211.776	198.004	171.256	194.787	189.995	182.475	197.236	246.632
1.725	195.912	194.617	182.08	180.805	194.148	208.088	159.466	188.915	226.87
1.8328	188.203	176.344	199.507	186.618	176.028	172.194	175.212	170.323	191.763
1.9406	188.541	165.366	213.886	184.197	202.06	189.466	147.479	190.449	198.427
2.0484	194.712	135.571	192.96	206.382	185.797	171.03	139.274	158.363	179.737
2.1562	195.271	168.22	176.842	207.927	202.39	172.715	175.92	150.368	183.688
2.264	203.32	185.634	190.945	190.424	199.971	179.283	178.759	161.463	157.904
2.3718	219.401	183.795	194.95	167.999	178.65	179.355	191.442	145.479	161.285
2.4796	204.46	183.593	170.667	192.511	161.663	183.784	171.388	174.22	160.243
2.5875	207.37	193.908	171.542	170.821	166.69	194.347	193.732	167.498	160.778
2.6953	215.097	171.111	193.042	178.535	174.239	166.821	162.654	188.167	177.631
2.8031	238.628	175.548	199.375	188.222	202.375	177.337	167.387	177.159	160.456
2.9109	237.237	165.348	178.89	187.407	169.146	186.599	143.552	160.279	166.611
3.0187	213.951	176.557	169.379	156.6	179.831	195.666	171.769	177.199	146.728
3.1265	219.874	168.579	179.887	181.986	180.233	198.251	163.898	162.757	161.43
3.2343	228.128	192.215	181.838	169.835	183.314	193.721	168.682	175.204	166.368
3.3421	211.52	197.431	175.406	184.867	194.553	229.177	168.997	170.349	167.419
3.4499	198.609	193.961	163.717	186.553	174.236	211.826	196.096	177.642	157.375
3.5578	219.299	183.666	168.475	193.876	182.432	197.88	180.058	181.061	165.316
3.6656	213.81	185.427	178.953	171.776	179.2	208.752	198.43	196.584	154.827
3.7734	212.298	188.941	186.814	187.167	179.226	192.29	176.985	188.76	160.845
3.8812	220.4	213.268	198.9	197.37	190.414	197.263	142.762	184.886	182.3
3.989	219.46	215.397	209.284	190.876	209.132	196.423	163.464	174.914	169.889
4.0968	205.258	185.629	206.38	179.031	198.474	192.332	165.655	175.61	186.634
4.2046	206.338	187.026	195.451	213.942	202.827	195.403	181.595	166.326	167.026
4.3124	202.579	187.085	186.947	208.457	204.438	205.933	202.007	159.12	160.886
4.4202	213.357	168.584	193.902	183.999	210.415	217.2	202.433	175.662	173.4
4.5281	204.639	191.992	204.139	172.596	184.829	214.647	211.376	189.73	156.472
4.6359	215.827	198.993	212.877	188.86	176.922	215.83	219.836	202.955	172.263
4.7437	243.96	192.869	212.396	203.07	175.614	215.001	242.119	217.619	188.064
4.8515	275.451	204.847	218.022	215.29	188.831	205.746	211.295	215.357	199.571
4.9593	278.624	244.565	225.168	224.397	219.539	192.541	196.468	227.587	212.253
5.0671	265.921	259.578	243.836	239.656	235.273	221.491	202.023	223.466	228.404
5.1749	275.803	283.917	244.48	228.832	239.376	216.29	204.343	205.628	213.897
5.2827	291.541	276.535	233.942	230.728	234.708	221.688	195.479	198.494	208.119
5.3905	307.83	288.71	249.303	218.683	224.115	221.605	216.255	228.802	200.537
5.4983	331.834	308.314	270.878	230.457	225.858	247.482	213.976	247.39	204.263
5.6062	333.582	345.768	307.246	284.578	241.564	227.048	216.382	244.816	217.419
5.714	324.265	359.662	327.191	322.567	306.036	221.085	210.782	240.804	214.278
5.8218	311.185	344.313	328.914	340.892	322.711	246.67	239.89	230.406	227.366
5.9296	303.834	366.397	345.644	315.645	342.404	265.58	244.132	243.301	205.27
6.0374	298.447	380.586	331.43	334.276	332.991	275.828	229.51	237.92	212.028
6.1452	316.401	359.838	352.518	337.822	313.126	293.124	237.286	251.646	216.233
6.253	294.823	361.965	398.422	379.886	341.389	305.22	272.255	256.861	212.799
6.3608	263.772	354.993	389.558	412.555	362.084	291.244	291.028	250.346	223.769
6.4686	252.366	340.392	389.69	423.231	367.356	324.1	289.548	274.335	214.286
6.5765	228.445	334.574	363.085	421.185	389.193	336.441	311.032	287.36	202.178
6.6843	203.38	364.016	365.821	427.108	394.829	344.958	326.482	298.498	215.231
6.7921	184.642	343.998	365.431	422.313	388.85	374.166	336.76	311.177	207.122
6.8999	160.882	332.053	353.86	429.342	394.809	396.564	348.826	347.331	228.423
7.0077	114.665	293.286	361.276	408.407	380.992	410.196	378.668	379.566	235.917
7.1155	93.482	268.607	361.313	416.214	420.35	407.186	404.227	397.226	280.783
7.2233		233.213	363.09	409.635	422.253	408.67	422.923	396.906	306.65
7.3311		222.841	336.081	405.406	454.247	415.703	383.037	428.078	323.33
7.4389		182.883	290.407	382.34	453.388	450.502	396.21	425.368	389.298
7.5468		143.911	252.658	409.079	465.458	452.081	389.44	418.382	420.922
7.6546		111.941	228.006	344.513	444.991	449.41	422.672	430.277	415.082
7.7624			209.246	318.034	413.196	457.709	438.332	459.81	380.834
7.8702			167.64	278.118	395.695	462.53	447.865	487.675	417.485
7.978			130.101	236.524	407.962	441.643	490.4	502.299	420.179
8.0858				229.496	405.514	429.967	501.931	512.701	406.559
8.1936				177.89	346.383	445.677	506.427	556.796	428.021
8.3014				122.245	307.611	425.92	496.49	525.283	449.799
8.4092				92.785	281.201	444.462	475.308	513.951	500.079
8.517					252.07	398.532	442.846	497.112	508.049
8.6249					210.371	362.436	450.831	479.542	515.884
8.7327					136.667	355.898	471.726	465.124	482.312
8.8405						335.16	446.576	474.483	453.75
8.9483						277.507	415.078	438.721	447.357
9.0561						241.826	368.465	421.593	444.159
9.1639						178.047	320.848	427.677	450.118
9.2717							273.285	425.238	442.743
9.3795							262.383	378.272	439.352
9.4873							226.383	341.716	407.633
9.5952							158.904	319.557	404.753
9.703								269.986	401.386
9.8108								235.199	362.073
9.9186								207.243	348.316
10.0264								165.126	325.12
10.1342								100.757	326.064
10.242									318.035
10.3498									275.129
10.4576									236.369
10.5655									218.712
10.6733									164.361
10.7811									106.404

## Sheet: dacB2mRFP
length (um)	birth frame	30min post birth	60min post birth	90min post birth	pre division frame
0	236.933	227.973	95.125	75.177	82.695	0
0.10833	210.152	225.776	116.946	90.79	101.263	0.10833
0.21667	205.518	260.599	115.783	126.621	104.499	0.21667
0.325	217.687	285.224	138.944	157.179	131.385	0.325
0.43333	223.108	274.919	192.259	179.883	174.819	0.43333
0.54167	216.549	270.847	228.918	241.837	196.415	0.54167
0.65	204.73	280.719	265.617	305.82	209.795	0.65
0.75833	246.432	265.962	306.068	350.742	280.435	0.75833
0.86667	238.32	246.039	332.46	354.642	327.758	0.86667
0.975	240.288	238.946	316.828	354.621	386.444	0.975
1.08333	230.925	237.609	300.59	291.43	465.795	1.08333
1.19167	216.065	222.354	270.784	220.269	539.937	1.19167
1.3	192.434	229.378	289.223	214.007	574.127	1.3
1.40833	214.278	234.043	270.137	228.535	587.84	1.40833
1.51667	225.947	259.634	263.786	215.021	543.599	1.51667
1.625	226.922	265.122	233.752	225.082	426.716	1.625
1.73333	218.591	263.791	253.211	246.307	366.211	1.73333
1.84167	258.354	242.924	258.224	246.702	297.466	1.84167
1.95	238.088	242.652	243.78	248.396	286.234	1.95
2.05833	229.909	229.53	242.437	242.891	265.705	2.05833
2.16667	203.581	216.738	232.932	196.46	251.799	2.16667
2.275	231.24	217.854	231.03	223.75	238.107	2.275
2.38333	207.256	230.432	238.89	251.76	256.313	2.38333
2.49167	227.083	228.027	240.644	256.72	249.43	2.49167
2.6	227.536	228.342	271.483	275.449	227.066	2.6
2.70833	190.927	207.585	275.884	275.433	205.985	2.70833
2.81667	194.796	181.883	260.966	256.799	217.873	2.81667
2.925	197.451	178.693	277.392	270.615	237.861	2.925
3.03333	212.804	212.573	277.306	280.65	255.689	3.03333
3.14167	225.719	200.501	253.547	254.769	273.531	3.14167
3.25	218.039	187.422	254.955	233.698	258.031	3.25
3.35833	208.514	239.886	254.054	204.187	239.908	3.35833
3.46667	225.452	222.807	251.828	216.439	241.249	3.46667
3.575	264.325	237.324	242.47	234.113	222.05	3.575
3.68333	286.073	302.445	235.057	238.284	222.055	3.68333
3.79167	373.926	358.322	235.307	206.934	215.465	3.79167
3.9	454.774	433.725	213.336	195.331	225.855	3.9
4.00833	475.295	430.353	215.375	200.005	223.464	4.00833
4.11667	455.883	416.797	246.273	220.678	243.353	4.11667
4.225	395.558	383.025	272.359	247.83	213.229	4.225
4.33333	374.393	363.346	279.015	255.125	203.409	4.33333
4.44167	319.989	346.135	309.448	267.676	190.214	4.44167
4.55	308.317	312.859	306.194	296.761	186.068	4.55
4.65833	287.129	297.064	330.316	308.708	203.93	4.65833
4.76667	272.207	268.01	404.709	360.296	222.944	4.76667
4.875	239.609	233.161	503.228	420.046	205.992	4.875
4.98333	168.556	168.476	560.699	421.195	223.511	4.98333
5.09167	169.922	170.923	579.888	405.87	261.426	5.09167
5.2	165.205	140.43	564.55	390.045	305.853	5.2
5.30833	125.289	134.379	519.264	426.859	366.572	5.30833
5.41667	117.443	158.325	503.068	408.284	438.445	5.41667
5.525	80.013	123.779	487.441	403.159	450.912	5.525
5.63333	74.421	108.806	455.845	411.077	442.335	5.63333
5.74167	67.388	102.948	396.657	350.554	410.408	5.74167
5.85		89.813	380.945	369.147	395.354	5.85
5.95833		67.304	357.436	375.6	409.389	5.95833
6.06667		74.018	313.294	352.471	416.29	6.06667
6.175		57.211	270.821	382.618	370.374	6.175
6.28333		57.459	290.605	332.364	345.797	6.28333
6.39167		52.066	276.955	320.491	347.544	6.39167
6.5		47.358	249.81	282.205	341.359	6.5
6.60833			216.697	274.796	330.913	6.60833
6.71667			199.113	248.239	331.852	6.71667
6.825			200.51	241.56	344.8	6.825
6.93333			163.213	211.436	342.262	6.93333
7.04167			159.945	199.321	312.495	7.04167
7.15			127.879	173.154	286.652	7.15
7.25833			123.535	150.682	292.162	7.25833
7.36667			129.638	142.715	295.084	7.36667
7.475			107.189	131.393	305.07	7.475
7.58333			80.839	126.568	276.151	7.58333
7.69167			66.676	108.005	253.292	7.69167
7.8			67.918	104.921	233.616	7.8
7.90833			65.169	118.955	236.094	7.90833
8.01667			65.897	94.937	214.811	8.01667
8.125				86.389	211.808	8.125
8.23333				67.244	207.36	8.23333
8.34167				60.183	190.82	8.34167
8.45				62.375	167.536	8.45
8.55833					162.306	8.55833
8.66667					140.094	8.66667
8.775					123.4	8.775
8.88333					106.992	8.88333
8.99167					97.98	8.99167
9.1					79.205	9.1
9.20833					66.969	9.20833
9.31667					68.005	9.31667
9.425					50.252	9.425
