# Supplementary material for: Maturing Mycobacterium smegmatis peptidoglycan requires non-canonical crosslinks to maintain shape
Source: eLife. 2018 Oct 16;7:e37516. doi: 10.7554/eLife.37516 (PMC6231781; doi:10.7554/eLife.37516)
Supplement: Figure 4—figure supplement 3—source data 1. — Alexa 488 NHS ester and FDAA incorporation used for Figure 1—figure supplement 2C,E. [file elife-37516-fig4-figsupp3-data1.xlsx]

## Sheet: bleb width in um
no guide	guide -aTc (not induced)	guide +aTc (induced)
1.35867	2.55533	1.38867
1.22333	0.911333	1.126
1.244	2.52867	1.02067
0.993333	1.01267	1.45933
1.02267	1.09133	2.73067
2.55	1.33533	1
3.252	1.47467	1.06733
1.15333	1.82133	2.71133
0.995333	1.15333	2.39467
2.026	2.736	1.62867
2.216	2.672	1.052
1.16867	1.216	1.374
1.45933	3.2	1.148
1.214	1.62133	1.45733
0.86	2.434	3.144
3.726	2.16733	0.848
0.724667	1.11	1.23533
3.74267	2.992	2.48
1.58467	1.10267	1.00733
1.562	0.950667	1.13667
1.35133	1.03933	1.11
0.807333	3.066	3.08467
1.71533	1.24133	1.36133
0.988	2.12467	3.48733
1.13867	1.424	4.268
1.57	1.68933	1.38867
2.95133	2.67	0.95
1.07267	2.19	1.01667
1.04133	1.65667	0.866667
2.67467	1.158	1.008
1.89267	1.60733	1.79333
3.51067	1.03933	0.782
1.29867	1.27933	0.836
1.052	2.44067	1.02533
1.742	1.83067	1.36733
1.80067	1.068	3.13333
1.56	1.63267	2.55333
1.17933	0.986	3.45133
3.74267	1.32467	1.056
1.18133	1.67933	1.60933
0.926	1.08667	1.528
3.008	2.34533	1.20867
2.024	3.16533	2.898
2.678	2.88933	1.08467
2.258	1.08133	0.991333
1.20133	1.82133	1.314
1.06467	0.76	1.47733
1.922	1.01267	1.02933
1.32733	1.448	0.888
0.912	2.12267	3.27533
1.148	1.31867	1.978
1.49933	1.922	1.76667
1.936	2.00267	1.59333
2.588	1.26733	1.054
2.05667	2.644	1.42
1.87667	1.93267	1.39467
1.34867	2.86667	1.21
1.36133	3.12267	0.978667
1.14467	2.52133	0.957333
1.11733	2.498	1.728
1.196	1.29867	1.16867
2.89733	1.922	1.71933
0.976667	2.19733	0.987333
1.448	1.41067	1.11533
2.16067	1.65133	1.33533
2.888	1.25533	1.27933
1.252	1.34933	1.272
1.39867	1.086	0.810667
2.34067	2.10133	3.21267
1.08933	1.138	1.11533
1.87133	1.22067	0.922667
2.524	1.41733	0.858
2.172	1.514	1.21333
2.86133	1.292	1.38067
1.798	0.975333	1.23467
3.022	0.989333	1.99
2.21733	1.292	3.02933
1.078	1.01133	1.15533
2.734	0.898	1.90067
0.940667	0.773333	0.932667
1.04133	1.018	1.04133
1.184	1.82133	1.51533
1.59533	1.584	0.835333
1.61467	3.57667	0.916667
1.47267	3.59333	1.002
1.50067	2.67	1.606
0.966667	1.264	1.788
1.39467	0.872667	0.872
3.71133	1.11	0.961333
2.32133	1.57333	1.206
1.18733	1.366	2.73467
1.42133	3.74533	2.62333
1.332	1.42333	2.47467
3.03333	2.388	1.296
0.986	1.12	1.01667
1.666	1.126	1.16333
1.216	0.888667	0.872
1.238	3.558	0.930667
0.875333	1.73667	1.16333
1.7	1.04333	0.841333
3.41133	1.93733	0.920667
1.03533	2.44867	0.837333
3.25067	2.06067	1.00933
1.62933	1.536	0.969333
1.45933	1.02133	2.61733
1.59467	2.79667	0.884667
1.19733	2.79	2.488
1.29467	1.238	1.56867
1.416	1.39867	2.76133
2.27667	0.911333	1.49467
1.252	1.206	1.27467
0.885333		1.584
3.27267		3.2
1.48133		1.02133
1.216		1.496
0.975333		1.094
2.086		1.47333
2.34267		1.18467
1.73533		3.12267
2.55733
1.296
2.03
1.75933
0.738667
1.19
1.106
