# Supplementary material for: Maturing Mycobacterium smegmatis peptidoglycan requires non-canonical crosslinks to maintain shape
Source: eLife. 2018 Oct 16;7:e37516. doi: 10.7554/eLife.37516 (PMC6231781; doi:10.7554/eLife.37516)
Supplement: Figure 4—source data 1. [file elife-37516-fig4-data1.xlsx]

## Sheet: ponA1-RFP
length	fluorescence (normalized)
0	0.0914206
0.0117289	0.22349
0.0235665	0.364932
0.0352954	0.497927
0.0470243	0.610786
0.0588619	0.721183
0.0705908	0.814472
0.0823197	0.872737
0.0941572	0.900069
0.105886	0.895758
0.117615	0.877555
0.129453	0.843934
0.141182	0.792179
0.152911	0.745912
0.164748	0.712784
0.176477	0.649568
0.188206	0.573097
0.200043	0.518805
0.211772	0.465655
0.223501	0.425546
0.235339	0.402362
0.247068	0.373635
0.258797	0.352748
0.270634	0.345337
0.282363	0.347121
0.294092	0.339135
0.30593	0.333932
0.317659	0.323024
0.329387	0.310766
0.341225	0.309904
0.352954	0.320638
0.364683	0.333557
0.37652	0.345503
0.388249	0.354151
0.399978	0.360951
0.411816	0.372738
0.423545	0.38574
0.435274	0.387439
0.447111	0.401723
0.45884	0.42108
0.470569	0.434065
0.482407	0.444463
0.494136	0.470517
0.505864	0.495817
0.517702	0.515967
0.529431	0.538833
0.54116	0.547935
0.552997	0.55704
0.564726	0.578949
0.576455	0.60006
0.588293	0.62387
0.600022	0.640399
0.611751	0.649575
0.623588	0.66177
0.635317	0.682539
0.647046	0.689471
0.658884	0.696109
0.670613	0.687708
0.682341	0.690651
0.694179	0.719954
0.705908	0.748469
0.717637	0.77371
0.729474	0.802736
0.741203	0.84286
0.752932	0.873566
0.76477	0.900999
0.776499	0.932369
0.788228	0.951439
0.800065	0.97536
0.811794	0.992036
0.823523	0.990896
0.835361	0.987965
0.847089	1
0.858818	0.976168
0.870656	0.942753
0.882385	0.903547
0.894114	0.859567
0.905951	0.817094
0.91768	0.761751
0.929409	0.679811
0.941247	0.572905
0.952976	0.453198
0.964705	0.331615
0.976542	0.218267
0.988271	0.115067
1	0

## Sheet: ldtE-mRFP
length	fluorescence (normalized)
0	0.111083
0.0142424	0.188572
0.0286166	0.255536
0.042859	0.334775
0.0571014	0.424248
0.0714757	0.524427
0.0857181	0.641767
0.0999604	0.764349
0.114335	0.885278
0.128577	0.970889
0.142819	1
0.157194	0.961936
0.171436	0.891842
0.185678	0.809456
0.200053	0.743505
0.214295	0.696916
0.228538	0.645154
0.242912	0.609962
0.257154	0.587442
0.271397	0.551247
0.285771	0.530851
0.300013	0.528826
0.314256	0.525279
0.32863	0.526765
0.342872	0.531089
0.357115	0.561847
0.371489	0.580305
0.385731	0.590401
0.399974	0.616426
0.414348	0.648342
0.42859	0.67787
0.442833	0.693774
0.457207	0.716867
0.471449	0.749476
0.485692	0.77209
0.500066	0.787771
0.514308	0.816235
0.528551	0.835482
0.542925	0.852562
0.557167	0.856997
0.57141	0.861097
0.585784	0.872438
0.600026	0.86304
0.614269	0.841644
0.628643	0.795622
0.642885	0.730455
0.657128	0.692149
0.671502	0.658607
0.685744	0.626776
0.699987	0.589607
0.714361	0.543073
0.728603	0.509454
0.742846	0.483404
0.75722	0.469322
0.771462	0.448416
0.785705	0.424532
0.800079	0.387906
0.814322	0.378616
0.828564	0.352639
0.842938	0.321255
0.857181	0.294886
0.871423	0.269693
0.885797	0.237095
0.90004	0.207396
0.914282	0.192587
0.928656	0.182991
0.942899	0.147452
0.957141	0.10719
0.971515	0.0854807
0.985758	0.0321286
1	0

## Sheet: dacB2-mRFP
length	fluorescence (normalized)
0	0.0914206
0.0117289	0.22349
0.0235665	0.364932
0.0352954	0.497927
0.0470243	0.610786
0.0588619	0.721183
0.0705908	0.814472
0.0823197	0.872737
0.0941572	0.900069
0.105886	0.895758
0.117615	0.877555
0.129453	0.843934
0.141182	0.792179
0.152911	0.745912
0.164748	0.712784
0.176477	0.649568
0.188206	0.573097
0.200043	0.518805
0.211772	0.465655
0.223501	0.425546
0.235339	0.402362
0.247068	0.373635
0.258797	0.352748
0.270634	0.345337
0.282363	0.347121
0.294092	0.339135
0.30593	0.333932
0.317659	0.323024
0.329387	0.310766
0.341225	0.309904
0.352954	0.320638
0.364683	0.333557
0.37652	0.345503
0.388249	0.354151
0.399978	0.360951
0.411816	0.372738
0.423545	0.38574
0.435274	0.387439
0.447111	0.401723
0.45884	0.42108
0.470569	0.434065
0.482407	0.444463
0.494136	0.470517
0.505864	0.495817
0.517702	0.515967
0.529431	0.538833
0.54116	0.547935
0.552997	0.55704
0.564726	0.578949
0.576455	0.60006
0.588293	0.62387
0.600022	0.640399
0.611751	0.649575
0.623588	0.66177
0.635317	0.682539
0.647046	0.689471
0.658884	0.696109
0.670613	0.687708
0.682341	0.690651
0.694179	0.719954
0.705908	0.748469
0.717637	0.77371
0.729474	0.802736
0.741203	0.84286
0.752932	0.873566
0.76477	0.900999
0.776499	0.932369
0.788228	0.951439
0.800065	0.97536
0.811794	0.992036
0.823523	0.990896
0.835361	0.987965
0.847089	1
0.858818	0.976168
0.870656	0.942753
0.882385	0.903547
0.894114	0.859567
0.905951	0.817094
0.91768	0.761751
0.929409	0.679811
0.941247	0.572905
0.952976	0.453198
0.964705	0.331615
0.976542	0.218267
0.988271	0.115067
1	0
