# Supplementary material for: Maturing Mycobacterium smegmatis peptidoglycan requires non-canonical crosslinks to maintain shape
Source: eLife. 2018 Oct 16;7:e37516. doi: 10.7554/eLife.37516 (PMC6231781; doi:10.7554/eLife.37516)
Supplement: Figure 5—figure supplement 2—source data 1. [file elife-37516-fig5-figsupp2-data1.xlsx]

## Sheet: Msm delta LDT RLU
time (hours)	meropenem	combination	amoxicillin	no drug
0	9891	8220	8175	6686
3	10478	6747	9106	9465
6	8385	4668	11480	20611
9	7792	2971	10378	33240
12	8237	1485	8968	54800
15	9351	548	6060	82638
18	10915	200	3571	120840

## Sheet: Msm LDT comp RLU
time(hours)	combination	meropenem	amoxicillin	no drug
0	6499	8317	6675	6891
3	3645	6123	6824	12151
6	1059	8687	8960	35588
9	196	8580	8950	76819
12	61	4455	6014	172290
15	92	1420	3025	374170
18	54	392	996	728800
