# Supplementary material for: Maturing Mycobacterium smegmatis peptidoglycan requires non-canonical crosslinks to maintain shape
Source: eLife. 2018 Oct 16;7:e37516. doi: 10.7554/eLife.37516 (PMC6231781; doi:10.7554/eLife.37516)
Supplement: Figure 5—source data 1. [file elife-37516-fig5-data1.xlsx]

## Sheet: WT Msm RLU
Time (Hours)	combination	meropenem	amoxicillin	no drug
0	12240	17923	11197	17298
3	4612	9567	7271	28660
6	2749	9553	7264	64829
9	1658	10774	9610	192980
12	647	12057	11229	546240
15	256	11227	11758	1486400
18	95	9809	12128	677730

## Sheet: MTB RLU
	DAY	No drug-1		no drug-2		no drug-3		AMX 5X-1		AMX 5X-2		AMX 5X-3		MERO 5X-1		MERO 5X-2		MERO 5X-3		A/M 5X-1		A/M 5X-2		A/M 5X-3
0	0	14289	13809	12747	12060	12646	13049	14562	14628	13999	13732	14234	14249	14806	13828	12932	13269	13919	14012	13805	15554	14650	14114	14063	15419
1	1	26297	26973	22545	23804	23840	24563	16446	17243	15454	16219	16952	16382	16955	17305	14340	15832	16159	16266	9478	10087	8769	9459	8429	8622
2	2	86108	91947	84122	85706	79818	85043	12982	13240	12432	12700	12826	12596	15891	17203	13661	13978	15040	14820	2242	2108	2305	2249	2203	2386
3	3	134438	130842	118775	130520	133943	136282	6598	6795	6170	6434	6084	7391	11329	11640	10519	10680	10118	11421	580	464	602	558	454	579
4	4	135925	128557	126751	135665	123468	139530	1492	1567	1440	1463	1343	1438	4590	4062	3381	3392	3485	3476	203	269	249	137	150
5	5	215582	223794	200062	202148	145566	153579	862	703	1114	891	588	800	4192	4580	3703	3866	3389	3735	225	183	83	158	225	152
5X refers to 5X MIC as determined by alamar blue
AMX=amoxicillin
MERO= meropenem
A/M is the combination of AMX and MERO
each biological replicate (1, 2 or 3) was measured in technical duplicate
