# Supplementary material for: Maturing Mycobacterium smegmatis peptidoglycan requires non-canonical crosslinks to maintain shape
Source: eLife journal article supplement (doi:10.7554/elife.37516), 2018-10-16

A

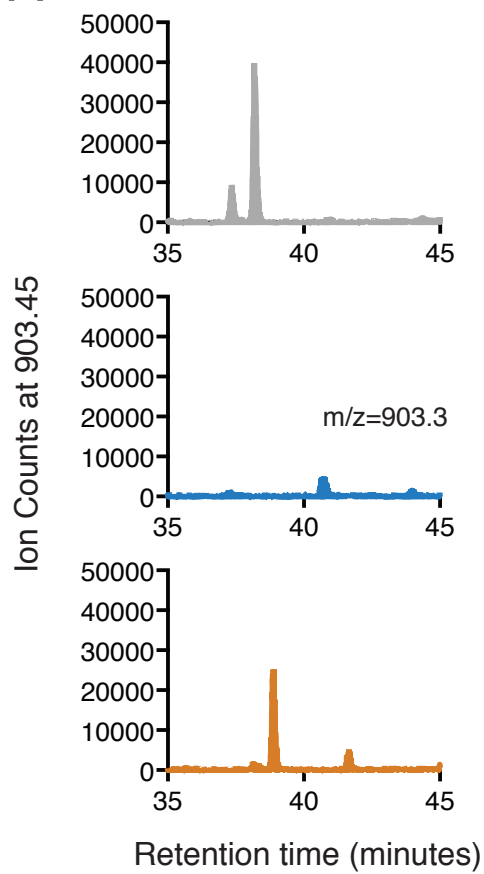

B

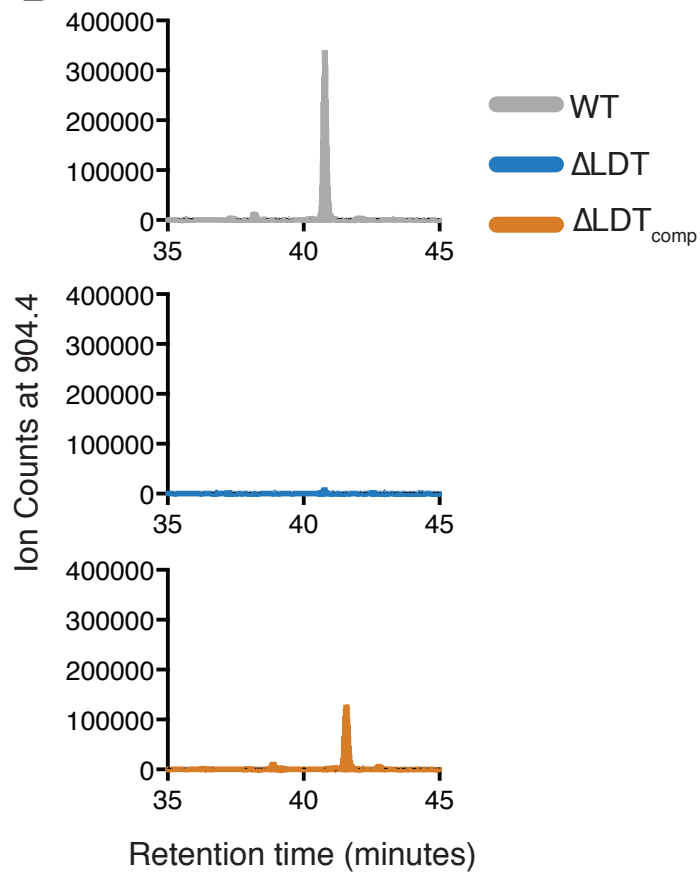

C

| Donor Stem | Acceptor Stem | amidated sites | Calculated $m/z$ [M+H] <sup>1+</sup> | Observed $m/z$ [M+H] <sup>1+</sup> |
|------------|---------------|----------------|--------------------------------------|------------------------------------|
| tripeptide | tripeptide    | 0              |                                      | ND                                 |
|            |               | 1              |                                      | ND                                 |
|            |               | 2              |                                      | ND                                 |
|            |               | 3              | 904.43                               | 904.42                             |
|            |               | 4              | 903.45                               | 903.44                             |
| tripeptide | tetrapeptide  | 0              |                                      | ND                                 |
|            |               | 1              |                                      | ND                                 |
|            |               | 2              |                                      | ND                                 |
|            |               | 3              | 975.47                               | 975.45                             |
|            |               | 4              | 974.49                               | 974.47                             |

D

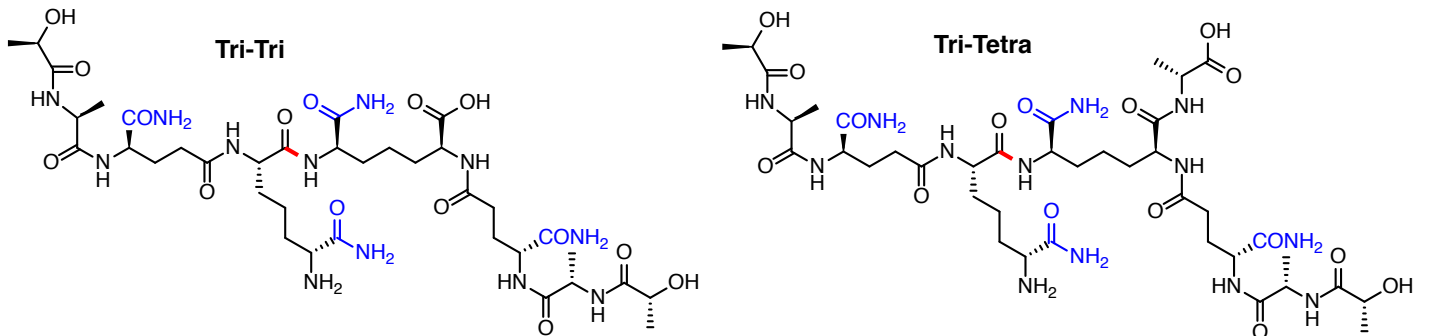

Supplement: supp [file elife_poa_e37516_Figure_1_figure_supplement_4.pdf › elife_poa_e37516_Figure_1_figure_supplement_4.pdf]
