# Supplementary material for: Maturing Mycobacterium smegmatis peptidoglycan requires non-canonical crosslinks to maintain shape
Source: eLife journal article supplement (doi:10.7554/elife.37516), 2018-10-16
Supplement: supp [file elife_poa_e37516_Figure_3_figure_supplement_1.pdf › elife_poa_e37516_Figure_3_figure_supplement_1.pdf]

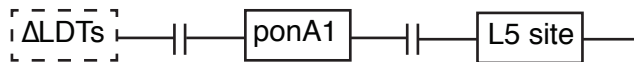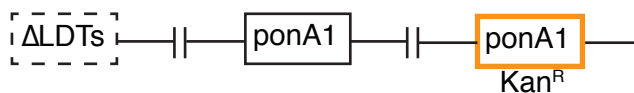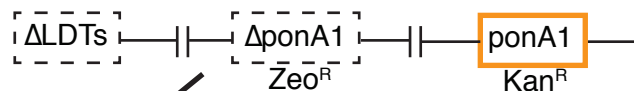

positive control swap of a  
NuoR marked WT ponA1

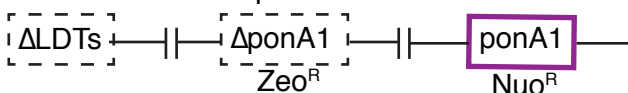

L5 allele  
swapping

test swap of a transpeptidase  
null allele of ponA1

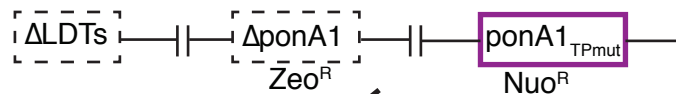

Count colonies and patch for  
NuoR and KanR. Colonies that  
are NuoR only are a successful  
swap, double resistant colonies  
are double integrants and are  
deemed unsuccessful swaps
