# Supplementary material for: Maturing Mycobacterium smegmatis peptidoglycan requires non-canonical crosslinks to maintain shape
Source: eLife journal article supplement (doi:10.7554/elife.37516), 2018-10-16
Supplement: supp [file elife_poa_e37516_Figure_5_figure_supplement_2.pdf › elife_poa_e37516_Figure_5_figure_supplement_2.pdf]

A

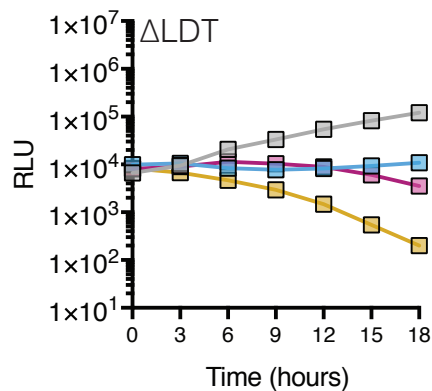

B

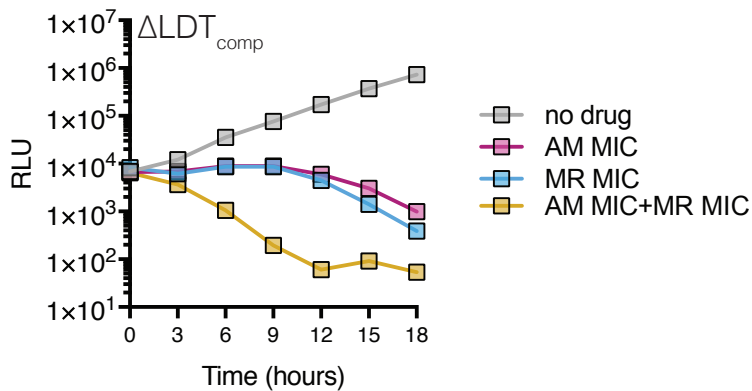

C

|                                  | MR MIC | AM MIC | MR MIC in combination | AM MIC in combination | FIC MR | FIC AM | FIC MR+FIC AM |
|----------------------------------|--------|--------|-----------------------|-----------------------|--------|--------|---------------|
| WT Msm                           | 10     | 2.5    | 5                     | 1.25                  | 0.5    | 0.5    | 1             |
| Msm $\Delta$ LDT                 | 0.625  | 0.156  | 0.313                 | 0.078                 | 0.5    | 0.5    | 1             |
| Msm $\Delta$ LDT <sub>comp</sub> | 20     | 10     | 10                    | 5                     | 0.5    | 0.5    | 1             |
|                                  |        |        |                       |                       |        |        |               |
| WT Mtb                           | 2.5    | 1.25   | 0.313                 | 0.156                 | 0.125  | 0.125  | 0.25          |
