# Supplementary material for: Maturing Mycobacterium smegmatis peptidoglycan requires non-canonical crosslinks to maintain shape
Source: eLife. 2018 Oct 16;7:e37516. doi: 10.7554/eLife.37516 (PMC6231781; doi:10.7554/eLife.37516)
Supplement: Supplementary file 1. [file elife-37516-supp1.xlsx]

## Sheet: Primers
Primer description	Primer Sequence	5' or 3' features	Primer KB#
MSMEG_3528 (ldtA) upstream flanking region FOR	CGTTGTAAAACGACGGCCAGTGATGGCGGGCGTGATCTGGAATCTCT	pUC57 overlap	208
MSMEG_3528 (ldtA) upstream flanking region REV	ACCCAACTTAATCGCCTTGCAGCTCTTCCAGTGTAGGTTGTCGAAACG	Zeo cassette overlap	209
MSMEG_3528 (ldtA) downstream flanking region FOR	TAATCATGGTCATAGCTGTTTTCATCGTGCAGGCGTGACGTGCAG	Zeo cassette overlap	210
MSMEG_3528 (ldtA) downstream flanking region REV	CAGTCGACGGGCCCGGGATCCGCGGTGGTGCCCTTGGTGATGGTC	pUC57 overlap	211
MSMEG_0233 (ldtE) upstream flanking region FOR	CGTTGTAAAACGACGGCCAGTGGCTGTCCGCCCAGCCCCGGGCC	pUC57 overlap	220
MSMEG_0233 (ldtE) upstream flanking region REV	CCAACTTAATCGCCTTGCAGCGTGGTACCTCCAGAGCACAACTG	Zeo cassette overlap	221
MSMEG_0233 (ldtE) downstream flanking region FOR	GTAATCATGGTCATAGCTGTTTCCGGACGTCATACGAAGAACCCCC	Zeo cassette overlap	222
MSMEG_0233 (ldtE) downstream flanking region REV	GCAGTCGACGGGCCCGGGATCTGGACCGACGCCGACCGCACCG	pUC57 overlap	223
MSMEG_4745 (ldtB) upstream flanking region FOR	GGTCGAGATGCTCCTGGAAGAGGCCG		444
MSMEG_4745 (ldtB) upstream flanking region REV	GAGCTCCAATTCGCCCTACGTCGTTACCTGCCCCATCACG	hyg cassette overlap	445
MSMEG_4745 (ldtB) downstream flanking region FOR	GTACCTCGAGTCTAGAAGTAGCGCTATCGCACCGCGCGGTCCAG	hyg cassette overlap	446
MSMEG_4745 (ldtB) downstream flanking region REV	CGACCCGGCCCGTCACAAGGACACCGAAC		447
MSMEG_0929 (ldtC) upstream flanking region FOR	CGTTGTAAAACGACGGCCAGTGAACTGGCGACGGCGCTGGGCGTGG	pUC57 overlap	216
MSMEG_0929 (ldtC) upstream flanking region REV	TGGAGCTCCAATTCGCCCTAGTGGATCTAGGGTACCGACAGCACGC	hyg cassette overlap	448
MSMEG_0929 (ldtC) downstream flanking region FOR	GGTACCTCGAGTCTAGAAGTAGTCCGGCGGCTAGGTCCGGCGGTTGAAG	hyg cassette overlap	449
MSMEG_0929 (ldtC) downstream flanking region REV	CAGTCGACGGGCCCGGGATCCCAAGGGACTCGCGCCGGTCTCC	pUC57 overlap	219
MSMEG_0929 (ldtC) upstream flanking region FOR	GGCTCGTTCTTCACCAACC		507
MSMEG_0929 (ldtC) downstream flanking region REV	CTGCCCAAGCTCATCGAC		508
MSMEG_0674 (ldtG) upstream flanking region FOR	GTTGTAAAACGACGGCCAGTGCGGCGTCGACCTCCCGGCCGGGTC	pUC57 overlap	228
MSMEG_0674 (ldtG) upstream flanking region REV	GTGGAGCTCCAATTCGCCCTAGCGCATTGGCTTCCGATTTCCCTCG	hyg cassette overlap	454
MSMEG_0674 (ldtG) downstream flanking region FOR	CGGTACCTCGAGTCTAGAAGTACGCCGACGTGTATGCCCACCCCCGCG	hyg cassette overlap	455
MSMEG_0674 (ldtG) downstream flanking region REV	GCAGTCGACGGGCCCGGGATCGCCTGCGCCCGCGGGAGCGCCTGCC	pUC57 overlap	231
MSMEG_0674 (ldtG) upstream flanking region FOR	GCATCTGAGTTTCGGCAAG		513
MSMEG_0674 (ldtG) downstream flanking region REV	CAACTACCCCGCAGTTGAAT		514
MSMEG_1322 (ldtF) upstream flanking region FOR	GTTGTAAAACGACGGCCAGTGCGAGGTAAGGGTCTCGACGGTTTCT	pUC57 overlap	224
MSMEG_1322 (ldtF) upstream flanking region REV	GTGGAGCTCCAATTCGCCCTATCCAATGTGCTTCGGCGAAAGCCAGTTTG	hyg cassette overlap	452
MSMEG_1322 (ldtF) downstream flanking region FOR	GTACCTCGAGTCTAGAAGTAGTTCCCCCCGGCCCACATATGTCTGGACG	hyg cassette overlap	453
MSMEG_1322 (ldtF) downstream flanking region REV	GCAGTCGACGGGCCCGGGATCCACGACAACGCCAGCGCGAT	pUC57 overlap	227
MSMEG_1322 (ldtF) upstream flanking region FOR	GGTCGACGACGAACTGGT		511
MSMEG_1322 (ldtF) downstream flanking region REV	AACGGCACGTACATCAGGAC		512
MSMEG_0233 (ldtE) FOR with TetO overlap (vector)	CATGCTTAATTAAGAAGGAGATATACAATGCCGAAATCGGCAAAACGCAG		323A
MSMEG_0233 (ldtE) REV (no stop codon) with ser-ser-gly linker	GATGACGTCCTCGGAGGAGGCCGAGCCGCCGAACATCTGCCAGTCGGATG		351
mRFP FOR with ser-ser-gly linker	CATCCGACTGGCAGATGTTCGGCGGCTCGGCCTCCTCCGAGGACGTCATC		352
mRFP REV with vector overlap	GTCCCCAATTAATTAGCTAAGTGATGGTGATGGTGATGACAGGCG		353
PonA1 FOR	atatatatCATATGaataacgaagggcg	restriction enzyme sites in CAPS	KK1
PonA1 REV no stop	atatatatGATATCcggtggcggcggggc	restriction enzyme sites in CAPS	KK2
RFP FOR	atatatatGATATCatggcctcctccgag	restriction enzyme sites in CAPS	KK3
RFP REV	atatatatAAGCTTttagcgccggtggagtg	restriction enzyme sites in CAPS	KK4
MSMEG_2433 FOR with vector overlap	GCTTAATTAAGAAGGAGATATACAATGTGGAGGTACGCCTTCGGGCTGG		626
2433 REV with gly-gly-ser linker and mRFP overlap	CGTCCTCGGAGGAGGCCGAGCCGCCGAGCGCCCCGATGCTCGCCGAACGG		627
mRFP FOR with 2433 and gly-gly-ser linker overlap	CGTTCGGCGAGCATCGGGGCGCTCGGCGGCTCGGCCTCCTCCGAGGAC		628
MSMEG_2433 (dacB2) FOR (first 27 amino acids truncated)	GGCCTGGTGCCGCGCGGCAGCCATCGCGCGGACGCCGACATCCAG	with 5' overlaps to pet28b cut with NdeI	662
MSMEG_2433 (dacB2) REV	GCTGTCCACCAGTCATGCTAGCCATCAGAGCGCCCCGATGCTCG	with 3' overlaps to pet28b cut with NdeI	663
