# Supplementary figures and images for: Maturing Mycobacterium smegmatis peptidoglycan requires non-canonical crosslinks to maintain shape
Source: eLife journal article supplement (doi:10.7554/elife.37516), 2018-10-16

A

*B. subtilis*  
*E. coli*

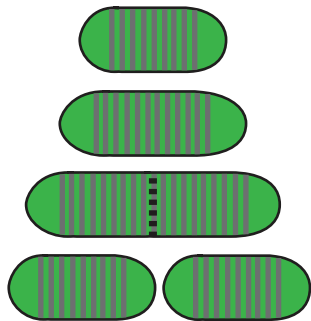

B

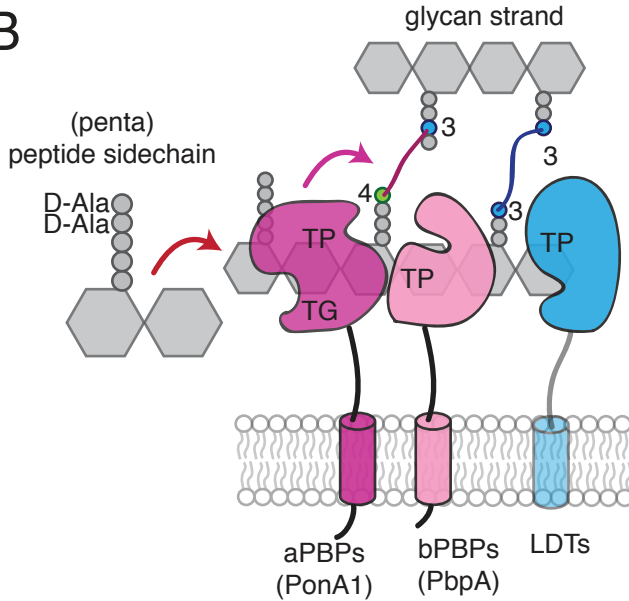

Supplement: supp [file elife_poa_e37516_Figure_1_figure_supplement_1.pdf › elife_poa_e37516_Figure_1_figure_supplement_1.pdf]

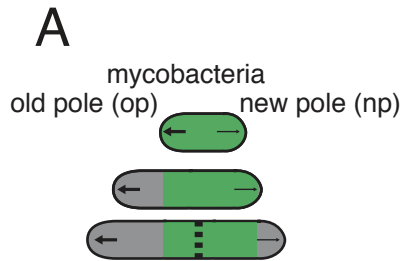

**B**

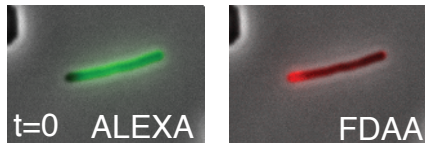

**D**

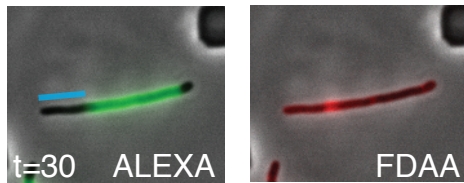

**C**

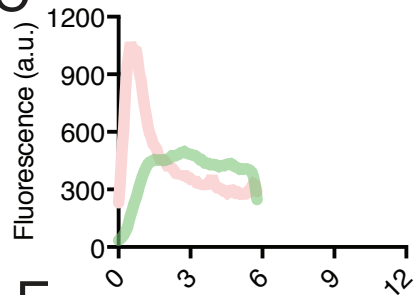

**E**

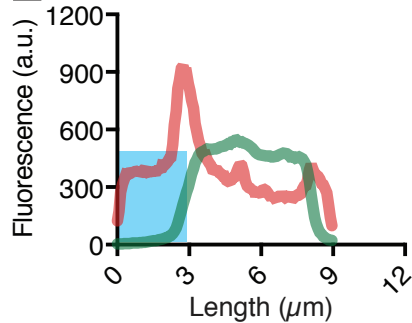

Supplement: supp [file elife_poa_e37516_Figure_1_figure_supplement_2.pdf › elife_poa_e37516_Figure_1_figure_supplement_2.pdf]

A

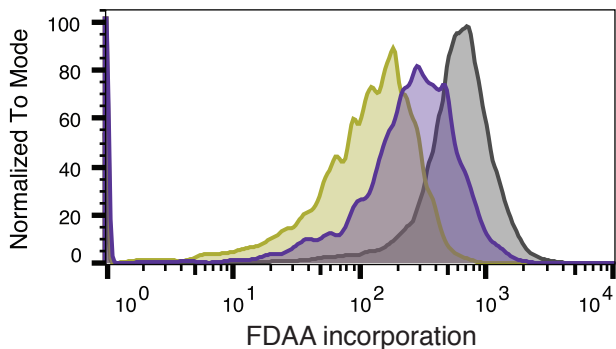

|                    | Median | CV    | Count |
|--------------------|--------|-------|-------|
| WT                 | 605    | 6407  | 13530 |
| $\Delta dtAEB$     | 91.3   | 10050 | 5236  |
| $\Delta dtAEBcomp$ | 246    | 8770  | 1890  |

B

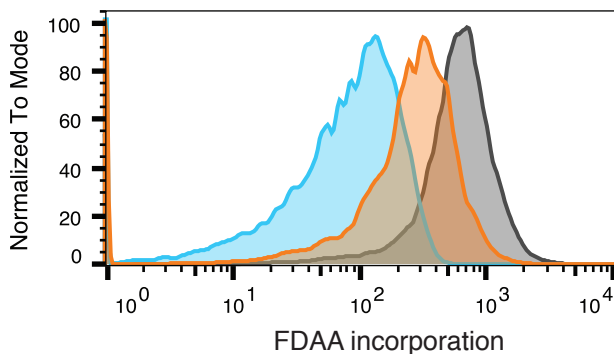

|                  | Median | CV    | Count |
|------------------|--------|-------|-------|
| WT               | 605    | 6407  | 13530 |
| $\Delta LDT$     | 29.9   | 12433 | 15324 |
| $\Delta LDTcomp$ | 266    | 7825  | 6907  |

Supplement: supp [file elife_poa_e37516_Figure_1_figure_supplement_3.pdf › elife_poa_e37516_Figure_1_figure_supplement_3.pdf]

A

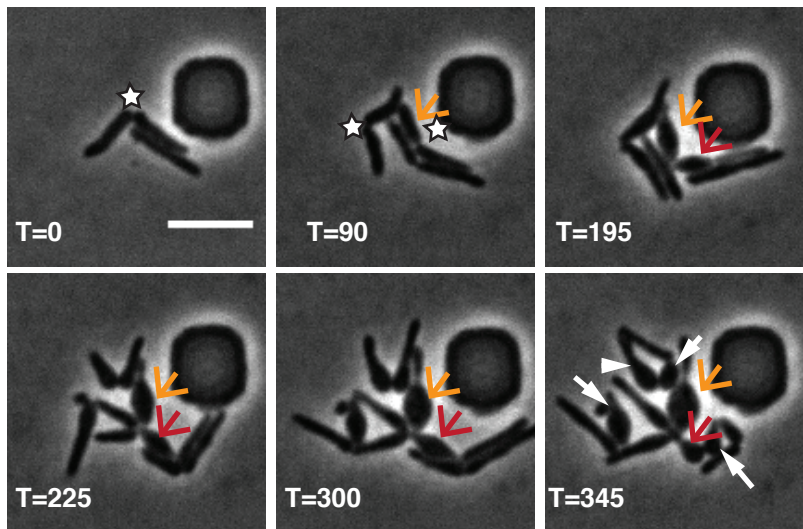

B

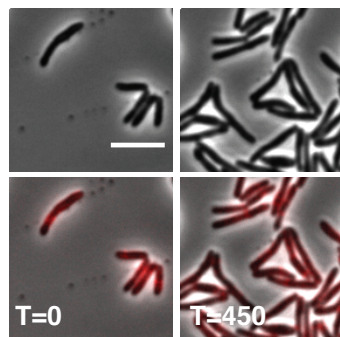

Supplement: supp [file elife_poa_e37516_Figure_2_figure_supplement_1.pdf › elife_poa_e37516_Figure_2_figure_supplement_1.pdf]

**A**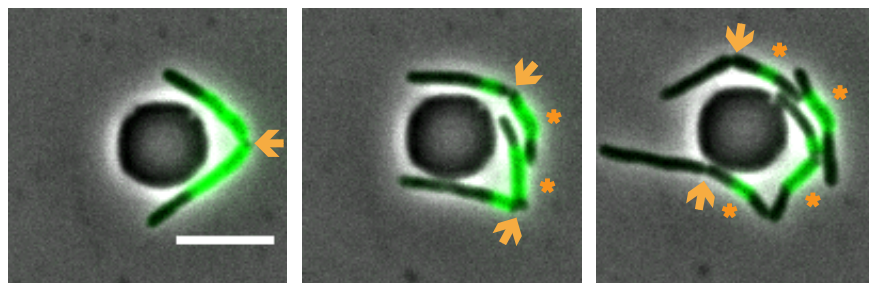 $t=135\text{min}$  $t=240\text{min}$  $t=330\text{min}$ 

→ new poles  
\* new pole daughter

**B**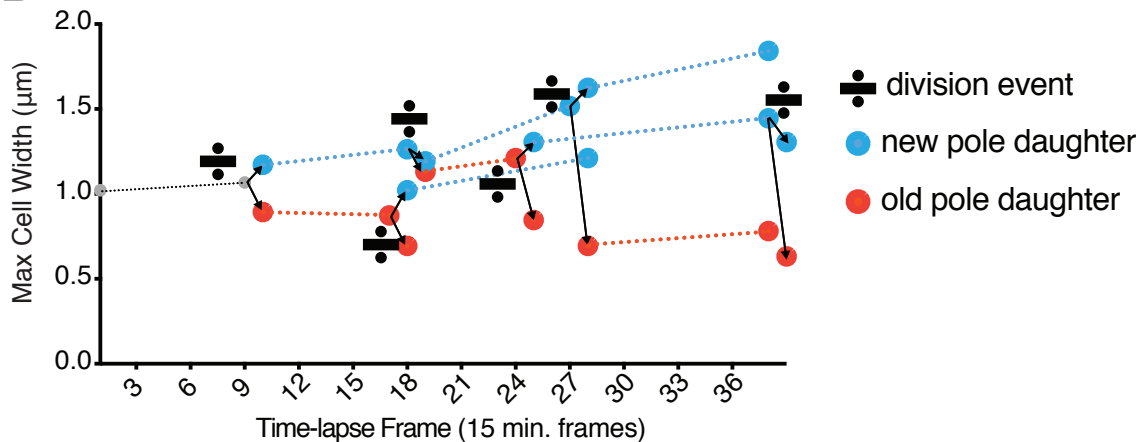

Supplement: supp [file elife_poa_e37516_Figure_2_figure_supplement_2.pdf › elife_poa_e37516_Figure_2_figure_supplement_2.pdf]

A

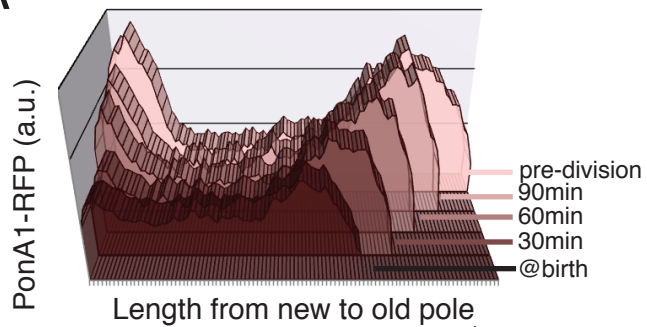

B

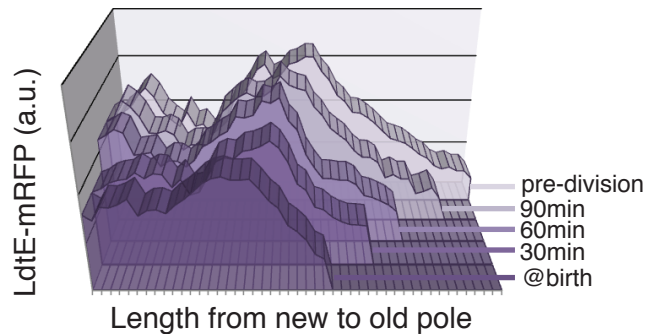

C

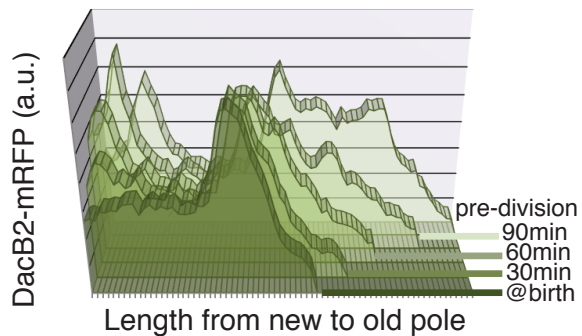

Supplement: supp [file elife_poa_e37516_Figure_4_figure_supplement_1.pdf › elife_poa_e37516_Figure_4_figure_supplement_1.pdf]

**A**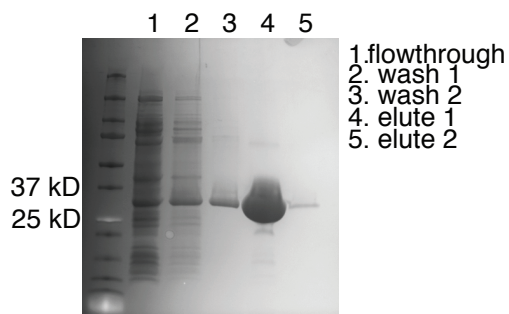**B**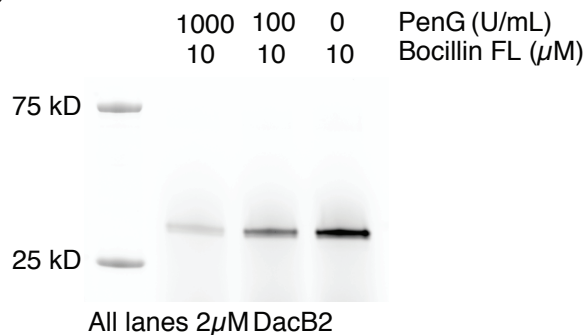**C**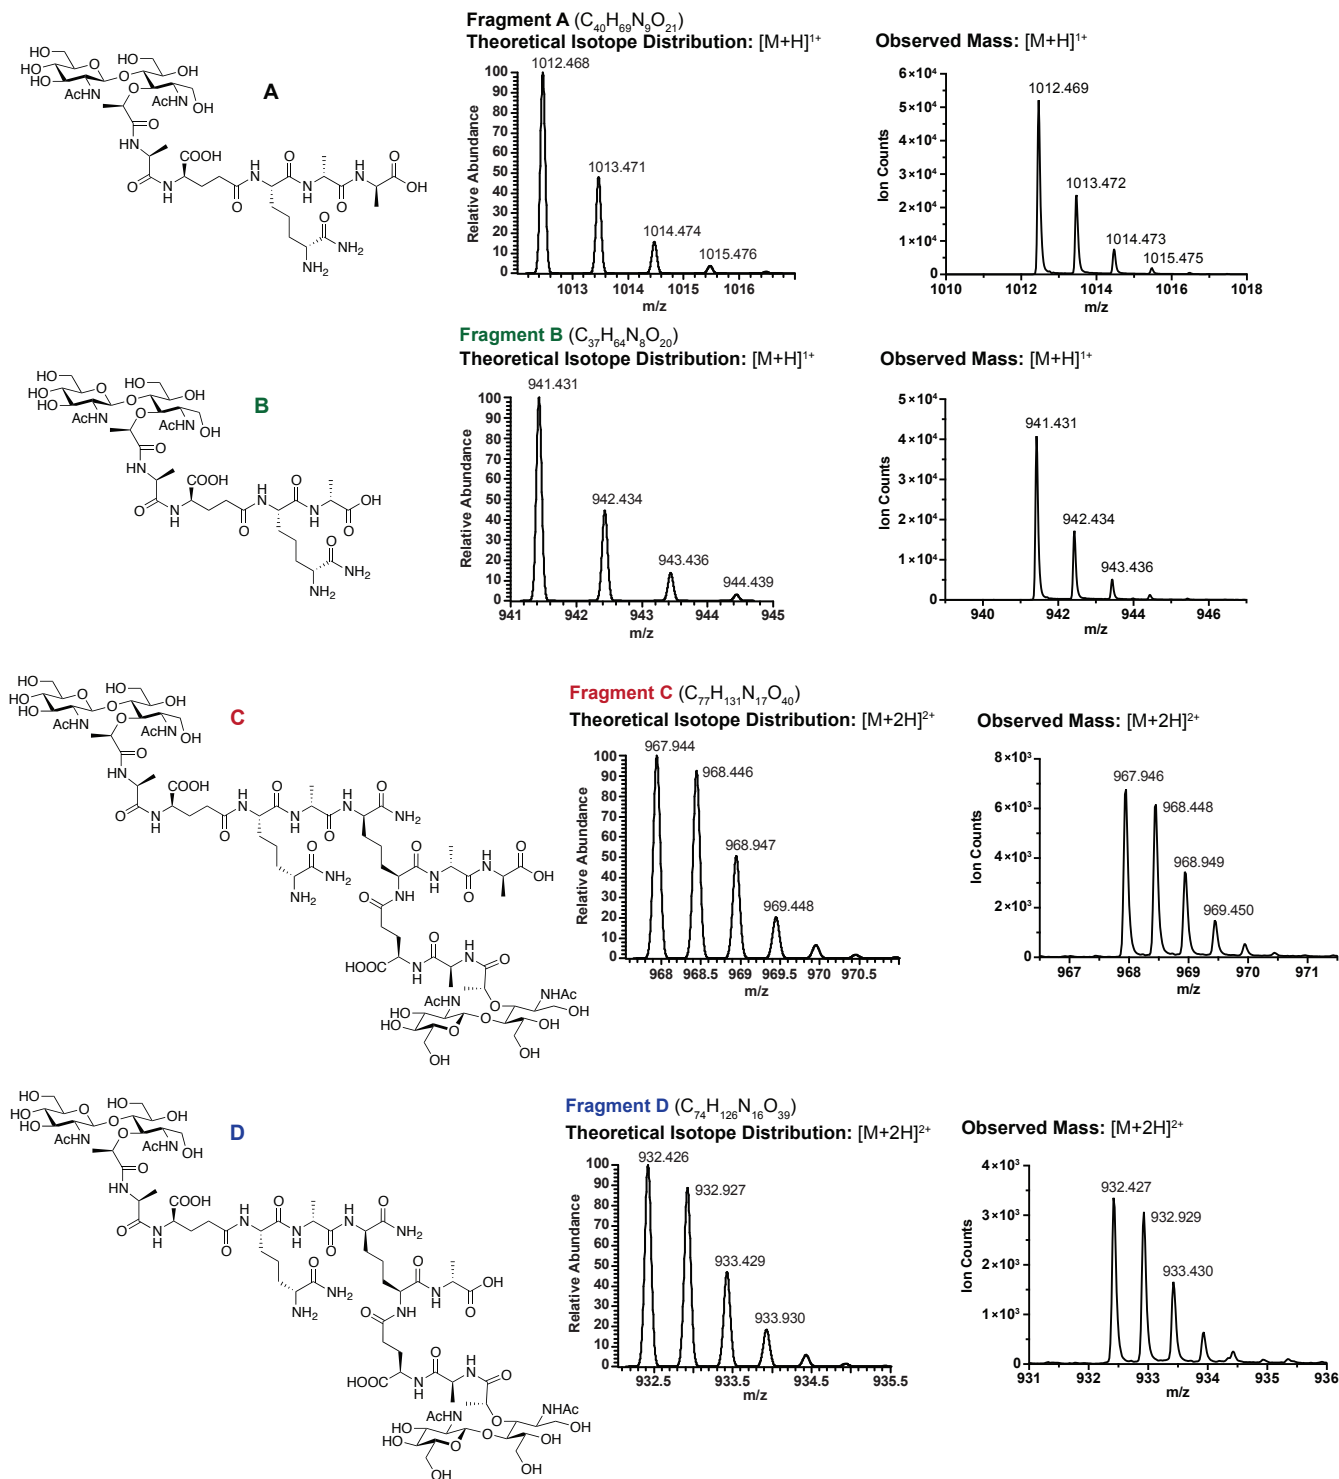

Supplement: supp [file elife_poa_e37516_Figure_4_figure_supplement_2.pdf › elife_poa_e37516_Figure_4_figure_supplement_2.pdf]

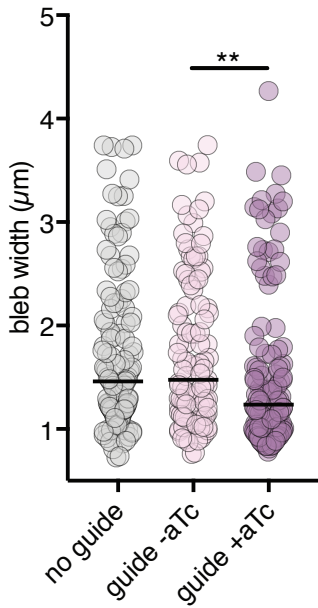

Supplement: supp [file elife_poa_e37516_Figure_4_figure_supplement_3.pdf › elife_poa_e37516_Figure_4_figure_supplement_3.pdf]

A

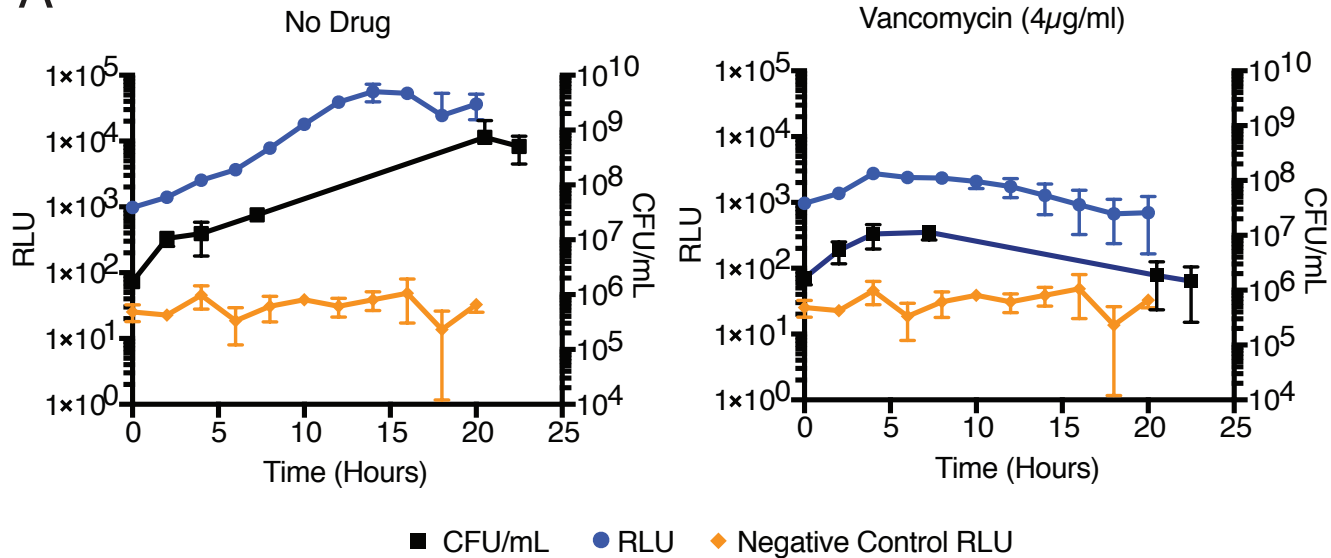

Supplement: supp [file elife_poa_e37516_Figure_5_figure_supplement_1.pdf › elife_poa_e37516_Figure_5_figure_supplement_1.pdf]
